# Supplementary material
Source: HighWire-hosted journal article supplement (https://genome.cshlp.org/content/suppl/2012/08/22/22.9.1634)
Supplement: Supp_TableS3_library_stats.xlsx [file Supp_TableS3_library_stats.xlsx]

## Sheet: Summary
Table S2. Statistics of the mouse and human small RNA mapping.
				17-40 nt ACGT							Intron (may include miRNA)	intron
Species	datasets	raw reads	clipped reads	clipped pass	perfect mapped	clipped unmapped	miRNA mapped (perfect hairpin)	miRNA mapped (tailed hairpin)	mirtron (perfect hairpin)	mirtron (tailed hairpin)	mapped	trimmed
Human	501	1358711357	1185025331	1023364356	652110561	371253793	494096521	102690453	78533	56624	133254416	15169877
Mouse	236	1480375413	1211803528	1090468574	649227262	441241312	431543037	87195904	234617	125707	92872757	10600599
