# Supplementary material
Source: HighWire-hosted journal article supplement (https://genome.cshlp.org/content/suppl/2012/08/22/22.9.1634)
Supplement: Supp_TableS4_human_loci.xlsx [file Supp_TableS4_human_loci.xlsx]

## Sheet: Human 3p tailed mirtron
Gene (Intron)	Fold; ΔG (kcal/mol)	5p reads		3p reads		Intron length	miRBase ID	Failed Criteria
		Perfect	Tailed	Perfect	Tailed
Known Human 3p tailed mirtron
KHSRP (14)	GTGGGTTGGGGCGGGCTCTGGGGATTTGGTCTCACAGCCCGGATCCCAGCCCACTTACC (((((((((((((((((.(((((......))))).))))))..)))))))))))..... (-37.00)	643.5	55.5	445.5	110	82	hsa-mir-3940
SCRIB (7)	GTGAGTCAGGGTGGGGCTGGCCCCCTGCTTCGTGCCCATCCGCGCTCTGACTCTCTGCCCAC ..(((((((((((.((.(((......((.....))))).)).)))))))))))......... (-26.70)	33.33	42	620	129	68	hsa-mir-937
Reclassified Human 3p tailed mirtron
REXO1 (11)	GTGAGTGCCGGTGCCTGCCCTGGGGCCGTCCCTGCGCAGGGGCCGGGTGCTCACCGCATC (((((..(((((.(((((...(((.....)))...))))).))).))..)))))...... (-35.00)	19	15	36	58.33	70	hsa-mir-1909
DGKZ (22)	CCAGGTAGGGGCAGCAGAGGACCTGGGCCTGGACATGGCACTCCCTGATCCTCAGCTGCCCTCTCTCCCACAG ...((.(((((((((.(((((...(((..((.......))..)))...))))).))))))).))..))..... (-31.10)	233.92	240.92	7	2	126	hsa-mir-4688
PCNXL3 (33)	GTGAGCAGGCGAGGCTGGGCTGAACCCGTGGGTGAGGAGTGCAGCCCAGCTGAGGCCTCT ...((.((((..((((((((((.((((........)).)).))))))))))...)))))) (-31.90)	36	8	218.33	160.67	83	hsa-mir-4690
PTBP1 (7)	GTGAGTGGGGCTCCCGGGACGGCGCCCGCCCTGGCCCTGGCCCGGCGACGTCTCACGGTCCC ....((((((((((((((.(((.(((......))).))).))))).)).)))))))...... (-31.00)	588	590	72	26	73	hsa-mir-4745
LAMA5 (27)	GTGAGTGGGAGCCGGTGGGGCTGGAGTAAGGGCACGCCCGGGGCTGCCCCACCTGCTGACCACCCTCC ....((((.(((.((((((((...(((..(((....)))...))))))))))).)))..))))..... (-36.50)	63	50	34	28	76	hsa-mir-4758
Novel Human 3p tailed mirtron
GTF2F1 (1)	GTGAGTGTGGATTTGGCGGGGTTCGGGGGTTCCGACGGCGACCTCGGCGACCCCTCACTCACC (((((((.((..(((.((((((((((.....)))).....)))))).)))..)).))))))). (-31.00)	24	39	6	2	80	hsa-mir-6790
CAMSAP3 (17)	GTAAGCAGGGGCTCTGGGTGATGTGAGGAGCAACAGGCACCCTCCTCCACAGCCCCTGCTCATTCCT ...((((((((((.((((......((((.((.....))..)))).)))).))))))))))....... (-29.60)	35	13	7	0	104	hsa-mir-6792
RPL8 (1)	GTGCGGAACGCTGGCCGGGGCGGGAGGGGAAGGGACGCCCGGCCGGAACGCCGCACTCACG ((((((....((((((.(((((.............)))))))))))....))))))..... (-34.62)	288	2302	9	1	77	hsa-mir-6850
FAM50A (12)	GTGAGGAGGGGCTGGCAGGGACCCCTCCAAGTTGGGGACGGCAGCCAGCCCCTGCTCACCCCTCGCC (((((.((((((((((..(((....)))..((((....)))).)))))))))).)))))........ (-42.10)	143.5	58.67	9	29	104	hsa-mir-6858
FKBP1A-SDCBP2 (1)	GTGAGTAGTGGCGCGCGGCGGCTCGGAGTACCTCTGCCGCCGCGCGCATCGGCTCAGCATGC .(((((....((((((((((((..((((...))))))))))))))))....)))))...... (-39.60)	42	22	12.5	0	80	hsa-mir-6869
HLA-B (1)	GTAAGGAGGGGGATGAGGGGTCATATCTCTTCTCAGGGAAAGCAGGAGCCCTTCAGCAGGGTCAGGGCCCCTCATCTTCCCCTCCTTTCCCAG ..((((((((((((((((((((....((((.((.((((...((....)))))).)).))))....)))))))))))..)))))))))...... (-48.30)	122	117.5	4	0	93	hsa-mir-6891

## Sheet: Human 5p tailed mirtron
Gene (Intron)	Fold; ΔG (kcal/mol)	5p reads		3p reads		Intron length	miRBase ID	Failed Criteria
		Perfect	Tailed	Perfect	Tailed
Known Human 5p tailed mirtron
RPS6KA4 (11)	TGTCCCGGGGGCGGGGCCGAAGCGCGGCGACCGTAACTCCTTCTGCTCCGTCCCCCAG ......(((((((((((.((((.((((...)))).....)))).)))))))))))... (-30.50)	6	2	19	145	102	hsa-mir-1237
NOP56 (1)	TGCCCTGGGAACGGGTTCCGGCAGACGCTGAGGTTGCGTTGACGCTCGCGCCCCGGCTCCCGTTCCAG .......((((((((..((((....(((.((((((.....))).))))))..))))..)))))))).. (-32.20)	4750	1568	7	11	178	hsa-mir-1292
RPS6KA1 (7)	AAAGGGTGGCAGCAAGGAAGGCAGGGGTCCTAAGGTGTGTCCTCCTGCCCTCCTTGCTGTAG ........((((((((((.((((((((.((...)).....)).)))))).)))))))))).. (-32.40)	39.17	35	238.03	248.7	344	hsa-mir-1976
PHC2 (2)	ATTGTGATGAGGATGGATAGCAAGGAAGCCGCTCCCACCTGACCCTCACGGCCTCCGTGTTACCTGTCCTCTAG ........((((((((.(((((.(((.((((.................)))).))).))))).))))))))... (-26.63)	4457	911	352	243	1685	hsa-mir-3605
COL3A1 (21)	CTAGGTTAGTGAAGGCTATTTTAATTTTTTTAAAATTTCTTTCACTACTTAG (((((.(((((((((..(((((((.....)))))))..)))))))))))))) (-18.60)	497	21	2	2	592	hsa-mir-3606
ARF1 (2)	AGGGAGTGGGCTGGGCTGGGCTGGGCCAAGGTACAAGGCCTCACCCTGCATCCCGCACCCAG .(((.(((((....((.(((..(((((.........)))))..))).))..))))).))).. (-31.90)	86.93	25.84	41	377	79	hsa-mir-3620	B.P. between mature/star: 11
AEBP1 (12)	TTGTCTGGGCGAGGGGTGGGCTCTCAGAGGGGCTGGCAGTACTGCTCTGAGGCCTGCCTCTCCCCAG ....(((((.((((((..(((.(((((((.((.........)).))))))))))..))))))))))) (-43.40)	43	26	16	86	103	hsa-mir-4649
TESK1 (6)	TTCTGACTGGGGAGCAGAAGGAGAACCCAAGAAAAGCTGACTTGGAGGTCCCTCCTTCTGTCCCCACAG ..(((..((((((.(((((((((.(((((((.........)))))..))..)))))))))))))))))) (-31.20)	297.5	141.5	6	18	148	hsa-mir-4667
ADCY6 (17)	AAGCCTTGGCCACCACACCTACCCCTTGTGAATGTCGGGCAATGGGTGATGGGTGTGGTGTCCACAG ......(((.((((((((((((((.((((.........)))).))))...)))))))))).)))... (-29.70)	17	3	6.5	18.5	321	hsa-mir-4701	5p + 3p reads: < 50
TMEM199 (4)	GTTGGTGGGGGAGCCATGAGATAAGAGCACCTCCTAGAGAATGTTGAACTAAAGGTGCCCTCTCTGGCTCCTCCCCAAAG .((((.((((((((((.(((...((.((((((..(((...........))).)))))).))))))))))))))))))).. (-38.50)	116	18	20	11	163	hsa-mir-4723	Mature 5p heterogeneity: 84.71%
ERBB2 (26)	GGGAGTGGGAGGGGAGAGGCAGCAAGCACACAGGGCCTGGGACTAGCATGCTGACCTCCCTCCTGCCCCAG (((.(((((((((...((((((((.((...(((...)))......)).))))).))))))))))))))).. (-35.50)	94.7	44.3	378.33	266	708	hsa-mir-4728
WDR26 (5)	TTTCATCAGGCAAAGGGATATTTACAGATACTTTTTAAAATTTGTTTGAGTTGAGGCAGATTAAATATCTGTATTCTCCTTTGCCTGCAG ......((((((((((((....((((((((.(((....(((((((((......)))))))))))))))))))).)).))))))))))... (-31.20)	687	49	523.5	358.5	288	hsa-mir-4742
CTIF (6)	CCTGCTGGCCGGATGGGACAGGAGGCATGAATGAGCCATCTTTCCAATGCCTTTCTGTCTTTTCTGGTCCAG ....(((((((((..((((((((((((((((.((....)).)))..))))))).))))))..))))).)))) (-34.50)	228	146	1	5	6117	hsa-mir-4743
TBC1D17 (15)	GGGCGCTCGGGCGGAGGTGGTTGAGTGCCGACTGGCGCCTGACCCACCCCCTCCCGCAG .....((((((.((.(((((((..(((((....)))))..)))).))).)).)))).)) (-29.20)	300	311	4	5	396	hsa-mir-4750
SYNGAP1 (8)	GTTAGTGAGGACAGGGCAAATTCACGAGATTGGGTTGTGCAGAGGCTGACACTTGGATTTTCCTGGGCCTCAG .....(((((.(((((.(((((((.......((((((.((....)))))).))))))))))))))..))))). (-21.01)	136.5	8.5	6	28	127	hsa-mir-5004
CALR (5)	CCACATTGGAGGGTGTGGAAGACATCTGGGCCAACTCTGATCTCTTCATCTACCCCCCAG ......(((.(((((..(((((.(((.(((....))).))).)))))...))))).))). (-21.80)	676.5	204	14	151	88	hsa-mir-6515
ENO1 (3)	CTAGATTGGGATGGTAGGACCAGAGGGGCTTACTGCCCTGTGGGGCTCTCTGGACCCAGTGCCATGCTTCTCTGCTCTGCTCTCCCCAG .......((((.((((((..(((((..((.....((((....))))...(((....)))......))..))))).)))))).))))... (-36.70)	235	152	1	11	615	hsa-mir-6728
EBNA1BP2 (1)	GTGCTTGGGAAAGACAAACTCAGAGTTCCCTTCTTGTGAGCTCAGTGTCTGGATTTCCTAG .....(((((((..((.((...((((((.........))))))...)).))..))))))). (-17.90)	172	48	14	67	234	hsa-mir-6733
ARHGEF2 (19)	GAAGGCGAGGGGTAGAAGAGCACAGGGGTTCTGATAAACCCTTCTGCCTGCATTCTACTCCCAG ........(((((((((..(((.(((((((......))))))).))).....)))))).))).. (-24.60)	74	30	43	25	210	hsa-mir-6738
IPO9 (13)	GAATGTGGGAAAGAGAAAGAACAAGTAAAAGGAATTTTCATTTTCCAGCCCCTAATTGTTCTGTCTTTCTCCCAG .....(((((.(((((.(((((((......((((........)))).........))))))).))))).))))). (-23.26)	92.36	11	42	31	4453	hsa-mir-6739
PACSIN3 (6)	GTGGAGTCCTGGGTGGAAGAAGGTCTGGTTCTCACCAGGCCCCTCCTCTCCCACCCAG ........((((((((.(((.((((((((....)))))))).....))).)))))))) (-28.90)	0	0	66.25	13	599	hsa-mir-6745	Star like reads: 0
EEF1G (5)	TTTGGAGGGGTGTGGAAAGAGGCAGAACATTCGTTCACTTTCCTGCCTTCCTCTGCACCAG ........((((..((..(((((((.................)))))))..))..)))).. (-22.63)	200.25	32	85.67	402.83	388	hsa-mir-6747
MARS (15)	TGGGCTAGAGAGGGGAAGGATGTGATGTGAGCAGATGGTTCTCACTCATTCTCCTCTGTCCAG (((((...(((((((((.((.((((...((((.....)))))))))).)))))))))))))). (-26.70)	68.33	36	33	90	397	hsa-mir-6758
PLCD3 (11)	TACAGGCCGGGGCTTTGGGTGAGGGACCCCCGGAGTCTGTCACGGTCTCACCCCAACTCTGCCCCAG ........(((((...((((((((.....(((((.....)).))))))))))).......))))).. (-26.10)	24	2	10	24	727	hsa-mir-6784
HGS (10)	GCTGCGGTGGGGCCGGAGGGGCGTCACGTGCACCCAAGTGACGCCCCTTCTGATTCTGCCTCAG .(((.((..((..((((((((((((((.((....)).))))))))))).)))..))..)).))) (-38.10)	13	1	38	24	117	hsa-mir-6786
PIEZO2 (6)	GACGGCTGGGAGAAGAGTGGTGAAGAAGAGTATTGATTGTGCTGTTCGCCACTTCCCTCCCTGCAG ....((.(((((..(((((((...(((.(((((.....))))).))))))))))..))))).)).. (-30.10)	127	19	31	24	121	hsa-mir-6788	Mature 5p heterogeneity: 73.47%
RUVBL2 (7)	GGCAGCCAGGGGGATGGGCGAGCTTGGGCCCATTCCTTTCCTTACCCTACCCCCCATCCCCCTGTAG ......((((((((((((.......(((................))).....))))))))))))... (-28.19)	10	5	26	64	101	hsa-mir-6798
PPP6R1 (11)	GAGGGCTAGGTGGGGGGCTTGAAGCCCCGAGATGCCTCACGTCTTCACCCCTCTCACCTAAGCAG ....(((((((((((((..(((((....(((....)))....)))))..))))))))))).)).. (-28.90)	54.5	38	123	151	87	hsa-mir-6802
ZSCAN22 (1)	TGCTCTGTAGGCATGAGGCAGGGCCCAGGTTCCATGTGATGCTGAAGCTCTGACATTCCTGCAG ....(((((((.(((...((((((.(((..((.....))..)))..)))))).))).))))))) (-22.70)	3	0	121	291	7637	hsa-mir-6806
PNKD (6)	CTGGGATGGGGACAGGGATCAGCATGGCACAGATCCAATACCTTCTGTCCCCTGCTCCCTTGTTCCCCAG ......(((((((((((...((((.((.(((((..........))))).)).)))).)))))).))))). (-30.20)	440.5	133	46	14	354	hsa-mir-6810
POLR2F (4)	CCTTCTGCGGCAGAGCTGGGGTCACCAGCCCTCATGTACTTGTGACTTCTCCCCTGCCACAG ....(((.(((((....((((((((.((..........)).))))))))....))))).))) (-22.60)	168.33	163.67	89.5	80.5	454	hsa-mir-6820
DBNL (2)	GTGGGACCAGGGCCAGCAGGGAATGTCAGGGCCACCCCTGACCTTCACTGTGACTCTGCTGCAG ((((...(((((...((((.(((.(((((((....))))))).))).))))..))))))))).. (-27.70)	202.67	89.5	48	18	1549	hsa-mir-6837
CLU (1)	CAGGCAGCAGGTGGGCGGGACGCCAGCAGGCTGTCTAGCTGTTCCCATGATGGTCTCCTGTTCTCTGCAG ......(((((.((((((((.((((.((((((....)))).......)).)))).))))))))))))).. (-26.81)	8	8	21	50	545	hsa-mir-6843
FUBP3 (11)	TGGAAAAGAGAGGAGCAGTGGTGCTGTGGCAGTGGCAGAGGTCGCTACAGCCCTGTGATCTTTCCAG ((((...((((...(((..((.((((((((...(((....))))))))))))))))..)))))))). (-25.20)	16	10	5	16	2652	hsa-mir-6856	5p + 3p reads: < 50
SYT12 (6)	AAACTGGGCAGGGCTGTGGTGAGTGAGTGTGACACTGGCCCTCACCTGTCCGCCTGCCCACAG ....((((((((.....(((((((.((((...)))).))..)))))......))))))))... (-27.60)	389	141	1	0	1030	hsa-mir-6860	Star like reads: 1
SLC12A3 (24)	GGCCATAGACGTGGTGAAGGATTGAGTGACCTCGATGATATGGGAAGTGACCACTCGGCTTTCTCCCGCCCAG ..........((((.(((((.(((((((((((((......))))..))...))))))))))))..)))).... (-17.10)	361	48	1	0	1886	hsa-mir-6863	Star like reads: 1
RANGAP1 (10)	CTGTGTCGGGGAGTCTGGGGTCCGGAATTCTCCAGAGCCTCTGTGCCCCTACTTCCCAG .......(((((((..((((..((((.(((....)))..))))..)))).))))))).. (-27.20)	88	20	0	31	1316	hsa-mir-6889
DDX54 (19)	GCTTCTGGGAGGAGGGGATCTTGGGAGTGATCCCAACAGCTGAGCTCCCTGAATCCCTGTCCCAG ....((((((...((((((...((((((...............))))))...)))))).)))))) (-27.96)	10	7	1	9	2157	hsa-mir-7106	5p + 3p reads: < 50
KDM2B (4)	TGCCGTCGGCCTGGGGAGGAGGAAGGGCAAGTCCAAAGGTATACAGTTGGTCTGTTCATTCTCTCTTTTTGGCCTACAAG ....((.((((.(((((((((((.((((.((.((((..........)))).)))))).))))).)))))))))).))... (-27.00)	9	7	1	0	177	hsa-mir-7107	Star length: 27
PISD (5)	GTCTCCTGGGGGGAGGAGACCCTGCTCTCCCTGGCAGCAAGCCTCTCCTGCCCTTCCAGATTAGC .....((((((((((((((..(((((((....)).))).))..)))))).)))).))))...... (-25.60)	7	6	2	40	176	hsa-mir-7109
NELF (8)	TCCGCTCTGTGGAGTGGGGTGCCTGTCCCCTGCCACTGGGTGACCCACCCCTCTCCACCAG ........((((((.((((((...((((((.......))).))).)))))).))))))... (-31.50)	40.75	41	5	38	150	hsa-mir-7114
CPSF1 (33)	GGCCCTGGGGAGCTGAGGCTCTGGGGGTGGCCGGGGCTGACCCTGGGCCTCTGCTCCCCAG ....(((((((((.(((((.((((((..(((....)))..))))))))))).))))))))) (-45.50)	110.2	139.37	88.42	53.67	73	hsa-mir-939
Reclassified Human 5p tailed mirtron
CIT (24)	GGGTCCAGGGTCAGCTGAGCATGCCCTCAGGTTGCTCACTGTTCTTCCCTAG (((...((((.(((.((((((.(((....)))))))))))))))).)))... (-20.60)	2	0	1	1	548	hsa-mir-1178	5p + 3p reads: < 50
CPSF1 (9)	GGGGGGGGGGGGGGGGGGCCGGGGACGGCTTGGGCCTGCCTAGTCGGCCTGACCACCCACCCCACAG .((((..(((.((..(((((((((..(((....)))..)))...))))))..)).))).)))).... (-39.80)	0.53	12.07	10.5	7	84	hsa-mir-1234	5p + 3p reads: < 50
DDX5 (11)	TTTGGTCTGGCTGTTGTGGTGTGCAAAACTCCGTACATTGCTATTTTGCCACACTGCAACACCTTACAG ....((..((.(((((..((((((((((...((.....))...)))))).))))..)))))))..)).. (-23.60)	1031	340	105	29	1236	hsa-mir-3064
TNFRSF1B (3)	CTGGGAGGGCAGCGTGGGTGTGGCGGAGGCAGGCGTGACCGTTTGCCGCCCTCTCGCTGCTCTAG .....(((((((((.(((.((((((((((((....)).)).)))))))).))).))))))))).. (-34.80)	4	2	21	17	688	hsa-mir-4632	5p + 3p reads: < 50
MYLIP (2)	TGAAATTGCTAAGTAGGCTGAGATTGATGTCAGGTTATCCCCAAGCATAACCTCACTCTCACCTTGCTTTGCAG ......(((.(((((((.(((((.(((.....((((((........))))))))).))))).))))))).))). (-23.60)	146	18	7	38	10877	hsa-mir-4639
DDR1 (4)	TGGGCTGGGCCAGGGAGCAGCTGGTGGGTGGGAAGTAAGATCTGACCTGGACTCCATCCCACCCACCCCCTGTTTCCTGGCCCACAG .....(((((((((((((((..(((((((((((....((.(((.....)))))...)))))))))))..)))))))))))))))... (-55.40)	95.6	54.5	18	35	1542	hsa-mir-4640
FOXP4 (16)	CAGAGTTCTGGGTGAGTTTGGGGGGCAGGGGGCAGAGGGCATCAGAGGACAGCCGCCTGGTGCCCATGCCATACTTTTGCCTCAG ((((.(((.....))))))).((((((((.((((..(((((((((.((....))..))))))))).))))...))..)))))).. (-38.80)	2	0	45	13	838	hsa-mir-4641	B.P. between mature/star: 0
ABHD16A (3)	GGCTGAACTGGGAAGAGGAGCTGAGGGACATTGCGGAGAGGGTCTCACATTGTCCCTCTCCCTTCCCAG .......((((((((.(((...((((((((.((..(((.....))).)).))))))))))))))))))) (-36.30)	101	56	5	31	245	hsa-mir-4646
NOTCH1 (4)	GTCCAGGCAGGAGCCGGACTGGACCTCAGGGAAGAGGCTGACCCGGCCCCTCTTGCGGCAG (((((((.(((.(((((..(((.((((......)))))))..))))).))))))).))).. (-29.70)	26	9	1	0	3284	hsa-mir-4673	Star like reads: 1
HPS1 (6)	ACTAGCCCAGGGCTTGGAGTGGGGCAAGGTTGTTGGTGATATGGCTTCCTCTCCCTTCCTGCCCTGGCTAG .((((.(((((((..(((..((((..(((..((((......))))..)))..))))))).))))))))))) (-34.00)	14	7	93.99	144.67	2648	hsa-mir-4685
PIEZO1 (4)	GGGCAGGAGGGCTGTGCCAGGTTGGCTGGGCCAGGCCTGACCTGCCAGCACCTCCCTGCAG ..((((((((((((.((.(((((((((......)))).))))))))))).))))).))).. (-35.60)	62	73	0	1	83	hsa-mir-4722	Star like reads: 1
MLLT6 (13)	GGAGAAGGGCCAGAGGAGCCTGGAGTGGTCGGGTCGACTGAACCCAGGTTCCCTCTGGCCGCAG .......((((((((((((((((.(((((((...)))))..))))))))))).))))))).... (-37.50)	205.5	73.5	17	16	166	hsa-mir-4726
UHRF1 (4)	CATTGAGGGAAGGAGGCTTGGTCTTAGCACGGGGTCTAAGGCCCGGGCTTTCCTCCCAG ......((((.((((((((((((((((.((...)))))))))).)))))))).)))).. (-27.70)	194	95.5	7	40	1864	hsa-mir-4747
PTOV1 (2)	GTCCCTGCGGGGACAGGCCAGGGCATCTAGGCTGTGCACAGTGACGCCCCTCCTGCCCCCACAG ....(((.((((.((((...((((.((...((((....)))))).))))..)))).)))).))) (-30.20)	186.5	90	12	48	108	hsa-mir-4749
Novel Human 5p tailed mirtron
KIAA0564 (44)	GTGGTTTGCCAGGGCAGGAGGTGGAAGGGAGCCCCATTTACAGTGGTAACTTCCTTTCCCTTTCCATCCTGGCAG ......((((((((..(((((.(((((((((..((((.....))))....))))))))))))))..)))))))). (-35.30)	6	7	17	140	2162	hsa-mir-5006
ATP6V0A1 (20)	AGAGCAGGGGGATGGCAGAGCAAAATTCATGGCCTACAGCTGCCTCTTGCCAAACTGCACTGGATTTTGTGTCTCCCATTCCCCAG ......(((((((((.(((((((((((((.(((........)))...(((......))).)))))))))).))).))))))))).. (-34.30)	2850	479.25	107	488.5	310	hsa-mir-5010
PRMT1 (4)	CCCATCAGGGCTCAGGGATTGGATGGAGGTGATGGGGGCAGGGGATGGGTCTCACCCTCCCTTCTTCCTGGGCCCTCAG ......((((((((((((..(((.(((((.....(((((.........)))))..))))).)))))))))))))))... (-35.40)	275.5	56	15	5	130	hsa-mir-5088
TOMM40L (2)	AAGGGTGGGATGAGGGATTGAAGTGGAGCAGGAATGCGCTTTTCTCCACTGAATCCTCTTTTCCTCAG .....(((((.((((((((..(((((((.((((......))))))))))).))))).))).))).)). (-24.70)	1918	679	35	119	653	hsa-mir-5187
CD22 (11)	GAGGCCAGGGAAGGGGACGAGGGTTGGGGAACAGGTGGTTAGCACTTCATCCTCGTCTCCCTCCCAG .......((((.((((((((((((..((.(((.....)))....))..)))))))))))).)))).. (-32.60)	29	25	22	246	475	hsa-mir-5196
PFKM (8)	CATTGGAATAGGGGATATCTCAGCATGTTGAGCCCTGTCTCTGGGGAGCTGACTTCTACCTCTTCCAAAG ..((((((.((((((....(((((........((((......)))).)))))..))).))).)))))).. (-22.10)	264	12	12	37.5	1474	hsa-mir-6505
KRT15 (1)	GAGAGCAGCAGGGGAGAGAGAGGAGTCCTCTAGACACCGACTCTGTCTCCTGCAG .......((((((((.((((.((.(((.....))).))..)))).)))))))).. (-27.50)	10	12	586	1266	1164	hsa-mir-6510
PKD1P1 (11)	GGGGCCTGCAGGCAGAAGTGGGGCTGACAGGGCAGAGGGTTGCGCCCCCTCACCATCCCTTCTGCCTGCAG .....(((((((((((((.((((.(((..((((..........))))..)))))..))))))))))))))) (-38.00)	80.33	73.81	122.14	84	127	hsa-mir-6511a
PKD1 (17)	GGGGCCTGCAGGCAGAAGTGGGGCTGACAGGGCAGAGGGTTGCGCCCCCTCACCACCCCTTCTGCCTGCAG .....(((((((((((((.(((..(((..((((..........))))..)))...)))))))))))))))) (-40.50)	80.33	73.81	194.7	250.67	127	hsa-mir-6511b-1
FLJ00285 (1)	GGGGCCTGCAGGCAGAAGTGGGGCTGACAGGGCAGAGGGTTGCGCCCCCTCACCACCCCTTCTGCCTGCAG .....(((((((((((((.(((..(((..((((..........))))..)))...)))))))))))))))) (-40.50)	80.33	73.81	194.7	250.67	127	hsa-mir-6511b-2
TMBIM1 (3)	GAGGCTTTGGGATTGACGCCACATGTCTCAGGTCCCCAGCTGAGTCAAGTGTCATCTGTCCCTAG ........(((((((((((....((.(((((........))))).)).))))))...)))))... (-21.30)	308	45	15.5	52	1813	hsa-mir-6513
NXF1 (19)	TATGGAGTGGACTTTCAGCTGGCATTTACGAGTCAGAGTTCTTACAGAGCTGCCTGTTCTTCCACTCCAG ..(((((((((....((((((((........)))))(((((.....)))))..)))....))))))))). (-26.10)	1102	257	5	65	1556	hsa-mir-6514
PHLDB1 (2)	GACCTTGGGAATGGGGGTAAGGGCCTTCTGAGCCCAGGTCCGAACTCTCCATTCCTCTGCAG ......((((((((((((..((((((.........))))))..)))).))))))))...... (-25.70)	3.5	2	212	66	131	hsa-mir-6716
ACAP3 (6)	GGGGGCGGGAGCTGGGGTCTGCAGGTTCGCACTGATGCCTGCTCGCCCTGTCTCCCGCTAG ...((((((((.((((((..((((((((.....)).))))))..)))))).)))))))).. (-36.30)	23	17	16	92	101	hsa-mir-6726
CPSF3L (13)	GGGTGCTCGGGGCAGGCGGCTGGGAGCGGCCCTCACATTGATGGCTCCTGCCACCTCCTCCGCAG ...(((..((((.(((.(((.((((...(((.((.....)).)))))))))).))))))).))). (-28.00)	40	75	2	22	91	hsa-mir-6727
MIIP (5)	GAGGGTGGGCGAGGGCGGCTGAGCGGCTCCATCCCCCGGCCTGCTCATCCCCCTCGCCCTCTCAG ..(((.(((((((((.((.(((((((((.........)))).))))).))))))))))).))).. (-42.10)	76	50	2	19	81	hsa-mir-6729
DHRS3 (3)	CCGAAAGAAAGGTGGAGGGGTTGTCAGAGCTGCGGCTGCTCCACCCTGACACCCCATCTGCCCTCAG ......((..((..((((((.(((((((((.......)))).....))))))))).))..)).)).. (-26.20)	123	81	7	9	336	hsa-mir-6730
RUNX3 (2)	ACAGGTGGGAGAGCAGGGTATTGTGGAAGCTCCAGGTGCCAACCACCTGCCTCTATTCCCCACTCTCCCCAG ......(((((((..(((....(((((.((...(((((.....))))))).))))).)))..)))))))... (-29.70)	269	59	4	33	8229	hsa-mir-6731
ZC3H12A (2)	AGGCCTAGGGGGTGGCAGGCTGGCCATCAGTGTGGGCTAACCCTGTCCTCTCCCTCCCAG .((...((((((.((((((.(((((.........)))))..)))).)).)))))).)).. (-26.60)	11.17	15.83	17	20	4350	hsa-mir-6732
ELOVL1 (6)	AGAACTTGAGGGGAGAATGAGGTGGAGAAGCCCAGGTTCTGAATCCCCTTCCCTCACTCTTCTCTCAG ......((((((((((.(((((.((((.....(((...)))......))))))))).)))))))))). (-26.00)	393.15	141.73	12	29	90	hsa-mir-6734
SZT2 (54)	GCAGCCAGGGCAGAGGGCACAGGAATCTGAGGTGACTGGCACAGAAGACTCAGGCCTGTGGCTCCTCCCTCAG ......((((.((.((.((((((...(((((....(((...)))....))))).)))))).)).))))))... (-28.60)	553.37	146.81	13.5	36	127	hsa-mir-6735
PIAS3 (11)	CTGAGCTGGGTGAGGGCATCTGTGGTTTGCTGGCTGCCTCAGCTCCTCTCTACCCACAG (((...((((((((((...(((.(((.........))).)))...))))).)))))))) (-20.50)	132	68	8	9	184	hsa-mir-6736
SLC39A1 (2)	TTGGGTTGGGGTGGTCGGCCCTGGAGGGGGTTTGTTTGCTTATTCCCCTCTGTGCTTCACCCCTACCCAG .(((((.(((((((..(((...((((((((.............))))))))..)))))))))).))))). (-37.02)	4	1	14	78	178	hsa-mir-6737
RNPEP (8)	GAAAGAGTTTGGGATGGAGAGAGGAGAAACTTGAGGTCTCTGGGAGTTGCTTAAACCAGTTGACCGTAACCTGGCCAGAGAATTCTGATAGTGTCTTCTCTCCTCCCAAACAG ......((((((((.((((((((((...(((.(((.(((((((..(((((((((.....))))..)))))....))))))).)))....))).)))))))))))))))))).. (-47.70)	165.5	44	5	52	1469	hsa-mir-6740
PYCR2 (1)	AATGGGTGGGTGCTGGTGGGAGCCGTGCCCTGGCCACTCATTCGGCTCTCTCCCTCACCCTAG ...(((((((....((.((((((((.((....))........)))))))).)))))))))... (-28.90)	72.2	76	67	21	124	hsa-mir-6741
TRIM11 (4)	GAGGGAGTGGGGTGGGACCCAGCTGTTGGCCATGGCGACAACACCTGGGTTGTCCCCTCTAG ...((((.((((...(((((((.(((((((....))..))))).))))))).)))))))).. (-29.10)	8	23	10	106	95	hsa-mir-6742
RIC8A (2)	GGGTAAAGGGGCAGGGACGGGTGGCCCCAGGAAGAAGGGCCTGGTGGAGCCGCTCTTCTCCCTGCCCACAG ........(((((((((.(((((((.(((((........)))))....)))))))...))))))))).... (-38.90)	5	5	29	37	88	hsa-mir-6743
MUC5B (38)	TCACGTGGATGACAGTGGAGGCCTCCTGGATCTCTAGGTCTCAGGGCCTCTCTTGTCATCCTGCAG ....(((((((((((.(((((((((((((....))))).....)))))))).))))))))).)).. (-35.80)	135	172	3	6	445	hsa-mir-6744
FADS3 (5)	CTTGCCCGGGAGAAGGAGGTGGCCTGGAGAGCTGCTGTCTCCAGCCGCCGCCTGTCTCCACAG ........((((((((.(((((.(((((((.......)))))))))))).))).))))).... (-33.30)	34.17	22	21	21	296	hsa-mir-6746
TMEM179B (4)	TGGTGTGTGGGTGGGAAGGACTGGATTTGAAATGGTCCCACTCCTGACGATCCTGTCCCTGTCTCCTACAG .....((((((.(((..((((.(((((......((.......))....))))).))))...))))))))). (-21.60)	39	8	3	14	206	hsa-mir-6748
ATG2A (2)	GGCCCTCGGGCCTGGGGTTGGGGGAGCTCTGTCCTGTCTCACTCATTGCTCCTCCCCTGCCTGGCCCAG .......(((((..((((.((((((((..((............))..))))))))...))))))))).. (-31.30)	22	2	2.83	27.5	123	hsa-mir-6749
ATG2A (7)	GCTGTCAGGGAACAGCTGGGTGAGCTGCTGCCCCAGAGGCCCAGCAGGTGTCCAGAACTCACCCTCTGCTCCCAG .......((((.(((..(((((((((((((((.....)))..)))))..........))))))).))).)))).. (-31.50)	41	43	2	20	273	hsa-mir-6750
SYVN1 (13)	TCTTCTTGGGGGTGAGGTTGGTGTCTGGCCCCAGCAGCCCAGACTGAGCCTCTCTCTCTCCAG .......(((((.((((((...(((((((.......))).))))..)))))).)))))..... (-24.10)	46	22	20	36	86	hsa-mir-6751
AIP (4)	ATGGAGGGGGGTGTGGAGCCAGGGGGCCCAGGTCTACAGCTTCTCCCCGCTCCCTGCCCCCATACTCCCAG ..(((((((((((.(((((..(((((...((((.....)))).)))))))))).)))))))...))))... (-35.20)	14	19	1.33	50	101	hsa-mir-6752
TCIRG1 (9)	CACCAGGGCAGAGCAGGGCTGATCATCTCACGTCAGAGAGAGGGGAAGGGGCTGCCCAGTGAGCCCCCACAGGGCTCTACATCTCCAGCTGGGCCTGGCTGGAGATCCCAGGGTCCCTGAAGGCCCCCGCCACCGTTCTGGTCTGTCTCTGCCCTGGCACCCAG ..(((((((((((((((.(((((........)))))((((.((((..((((((((((.((((((((.....)))))).)).(((((((((......))))))))).....)))).......))))))..)).)).))))..)))).)))))))))))....... (-84.01)	23.33	26.33	38	116	613	hsa-mir-6753
NADSYN1 (7)	GGCTGCCAGGGAGGCTGGTTTGGAGGAGTCTGGTGGCCTGTTCTCTTCACCTGCCTCTGCCTGCAG ..(((.(((((((((.(((..(((((((((....)))...))))))..))).)))))..))))))) (-29.20)	18	18	10	8	202	hsa-mir-6754
EED (11)	TGTTTTAGGGTAGACACTGACAACGTTATGTGTGGTCTTTAACCTGTTGTCATGTTTTTTCCCTAG .....(((((.(((((.((((((((........(((.....))))))))))))))))...))))). (-20.20)	143	1	7	12	407	hsa-mir-6755
MCAM (5)	ACCCTAGGGTGGGGCTGGAGGTGGGGCTGAGGCTGAGTCTTCCTCCCCTTCCTCCCTGCCCAG ......(((..(((..(((((.((((..(((((...)))))..))))))))).)))..))).. (-33.50)	21.25	24.75	0.5	69	1539	hsa-mir-6756
TENC1 (10)	GGGCTTAGGGATGGGAGGCCAGGATGAAGATTAATCCCTAATCCCCAACACTGGCCTTGCTATCCCCAG .......(((((((((((((((..((..(((((.....)))))..))...)))))))).)))))))... (-29.30)	76.33	26.5	16	11	1167	hsa-mir-6757
CDK4 (7)	TATTGTTGTGGGTGGGCAGAAGTCTGTTTTCTTCATGGTTTTCTGACCTTTGCCTCTCCCCTCAG ......((.(((.(((((((.(((......((....))......))).)))))))...))).)). (-18.40)	70.33	16	0	4	564	hsa-mir-6759
CUX2 (9)	CAGTGCAGGGAGAAGGTGGAAGTGCAGAGTGGGCTCACCTCTCGCCCACACTGTCCCCTTCTCCCCAG .......(((((((((.((....((((.((((((.........)))))).)))))))))))))))... (-35.10)	76.67	22.33	2.14	32	5620	hsa-mir-6760
ALDH2 (10)	GCTCTGAGAGAGCTCGATGGCAGGTGCCTCCGTGTTGCCGAACCCTCCTACGCTGCTCTCTCACTCCAG ....(((((((((.((..((..(((.....((......)).)))..))..))..)))))))))...... (-20.70)	724	709	20	1	1663	hsa-mir-6761
TPCN1 (24)	AGAGCCGGGGCCATGGAGCAGCCTGTGTAGACGGGGACCTGCCCTGCATGGGCACCCCCTCACTGGCTGCTTCCCTTGGTCTCCAG .(((((((((....(((((((((.(((.((..((((...(((((.....)))))))))))))).))))))))))))))).)))... (-47.80)	14.5	5	26.5	53	610	hsa-mir-6762
FBRSL1 (15)	TTCTCCTGGGGAGTGGCTGGGGAGCAGACAGACCCAACCTCATGCTCCCCGGCCTCTGCCCCCAG .....((((((((.((((((((((((...((.......))..)))))))))))).))..)))))) (-38.70)	39.24	89.14	3	13	237	hsa-mir-6763
YY1 (4)	GACTCCCAGGGTCTGGTCAGAGTTGCTGAGTGGGTTGATCTCTGGTCTTTCCTTGACAG ......(((((...((((((((..(((.....)))....))))))))...))))).... (-16.30)	107	42	18	1	769	hsa-mir-6764
POLG (8)	ATGAGCGGGTGGGAGCAGATCTTATTGAGAGTTCCTTCTCCTGCTCCTGATTGTCTTCCCCCACCCTCACAG .(((..(((((((...((((...(((..((((..........))))..))).))))...))))))))))... (-22.10)	29	2	32	16	173	hsa-mir-6766
CCNF (9)	TGAAATCGCAGACAGGGACACATGGAGAACGCCCCCACCAGTTCCCACGTGCTTCTCTTTCCGCAG .......((.((.((((((((.(((.((((..........))))))).)))..))))).)).)).. (-19.80)	484	43	4	5	1657	hsa-mir-6767
C16orf59 (8)	CCAGGCACACAGGAAAAGCGGGGCCCTGGGTTCGGCTGCTACCCCAAAGGCCACATTCTCCTGTGCACACAG .......(((((((.((....((((..((((.........))))....))))...)).)))))))....... (-23.30)	19	26	8	2	1306	hsa-mir-6768
MGRN1 (8)	AGGCCAGGTGGGTATGGAGGAGCCCTCATATGGCAGTTGGCGAGGGCCCAGTGAGCCCCTCTCTGCTCTCCAG ......((.(((((.(((((.((..((((..(((..((...))..)))..)))))).))))).))))).)).. (-25.30)	11	34	0	22	3078	hsa-mir-6769a
IKBKE (4)	CTTCCTGGTGGGTGGGGAGGAGAAGTGCCGTCCTCATGAGCCCCTCTCTGTCCCACCCATAG .......(((((((((..(((((...(((((....))).))...)))))..))))))))).. (-28.00)	30.33	2.67	9	31	393	hsa-mir-6769b
NPIP (5)	TATCCTGAGAAGGCACAGCTTGCACGTGACCTCCTGGGCCTGGCGGCTGTGTCTTCACAG ....(((.(((((((((((.(((.((...((....))...)))))))))))))))).))) (-27.50)	25.14	5.86	17.33	15.33	124	hsa-mir-6770
ADCY7 (4)	GGTGCCTCGGGAGGGCATGGGCCAGGCCACATAATGAGCCAAACCCCTGTCTACCCGCAG .....((((((.(((((.(((...(((((.....)).)))...))).))))).)))).)) (-23.40)	23	172	1	3	778	hsa-mir-6771
KIFC3 (4)	AGGCCTGGGTGTAGGCTGGAGCTGAGGACTGAGGCTCACCTTGCTCCTGACTCTGTGCCCACAG .....((((..((((..(((((.((((..((.....)))))))))))....))))..))))... (-24.70)	29	8	17	9	4197	hsa-mir-6772
ESRP2 (4)	GGGAGTTGGGCCCAGGAGTAAACAGGATTAGTGCTTATGCTAAGATGTCTTCACTGTCACTTCTCTGCCCATAG ......(((((..((((((..(((((((((((......))))).......)).)))).))))))..)))))... (-20.51)	52	8	2	2	342	hsa-mir-6773
IRF8 (6)	TGTGCACTTGGGCAGGAGGGACCCTGTATGTCTCCCCGCAGCACCGTCATCGTGTCCCTCTTGTCCACAG ........((((((((((((((.((((..........))))...((....)).))))))))))))))... (-26.40)	12.5	5	22	44	3896	hsa-mir-6774
SLC7A5 (8)	GAACCTCGGGGCATGGGGGAGGGAGGCTGGACAGGAGAGGGCTCACCCAGGCCCTGTCCTCTGCCCCAG .......((((((.((((.((((...((((....(((....)))..)))).)))).)))).)))))).. (-35.90)	9.17	16	135.5	181	1906	hsa-mir-6775
KIAA0664 (17)	CGGGCTCTGGGTGCAGTGGGGGTTCCCACGCCGCGGCAACCACCACTGTCTCTCCCCAG .(((....(((.(((((((.((((.((.......)).)))).))))))))))..))).. (-25.70)	20.5	19	8	23	1039	hsa-mir-6776
SREBF1 (12)	TCAAGACGGGGAGTCAGGCAGTGGTGGAGATGGAGAGCCCTGAGCCTCCACTCTCCTGGCCCCCAG .......((((.((((((.(((((.((....((.....))....)).)))))..)))))))))).. (-31.90)	338	281	6	87	89	hsa-mir-6777
SHMT1 (5)	GTTCAAGTGGGAGGACAGGAGGCAGGTGTGGTTGGAGGAAGCAGCCTGAACCTGCCTCCCTGACATTCCACAG ......((((((...((((((((((((..(((((.......)))))...)))))))))).))...)))))).. (-38.10)	38.5	35	0	6	6682	hsa-mir-6778
LASP1 (5)	GAGCTCTGGGAGGGGCTGGGTTTGGCAGGACAGTTTCCAAGCCCTGTCTCCTCCCATCTTCCAG ......((((((((((.((((((((.(((....))))))))))).))).)))))))........ (-30.20)	136	87.67	6	4	567	hsa-mir-6779
EZH1 (14)	GACACTTGGGAGGGAAGACAGCTGGAGAGTATGGTCACAGCAGCATCCTCCTCTGTTTTCTTTCCTAG ......(((((((((((((((..((((.((.((.......))..)).)))).))))))))))))))). (-26.20)	584.5	163	4.33	13	792	hsa-mir-6780a
ABCC10 (3)	CAGCCTGGGGAAGGCTTGGCAGGGAAGACACATGAGCAGTGCCTCCACTTCACGCCTCTCCCTTGTCTCCTTTCCCTAG ....((((((((((...(((((((.(((....(((..((((....)))))))....))).)))))))..)))))))))) (-30.50)	23.83	20	6	60	1260	hsa-mir-6780b
BECN1 (1)	AACCCCGGGCCGGAGGTCAAGGGCGTCGCTTCTCCCTAATGTTGCCTCTTTTCCACGGCCTCAG ......((((((..((..(((((.((.((...........)).)))))))..)).))))))... (-20.60)	24	14	6	22	253	hsa-mir-6781
UBTF (17)	TGGGGTAGGGGTGGGGGAATTCAGGGGTGTCGAACTCATGGCTGCCACCTTTGTGTCCCCATCCTGCAG ....((((((...(((((...((((((((.((..........)).))))))))..))))).)))))).. (-29.90)	56	16	27	9	93	hsa-mir-6782
KIF18B (3)	CCTGTTAGGGGAAAAGTCCTGATCCGGGAACCCACAGCCCCGTTCCTGGGCTTCTCCTCTGTAG .....(((((((.((((((.((..((((..........)))).))..)))))).)))))))... (-23.90)	98	32	18	25	213	hsa-mir-6783
KIAA0195 (29)	CTCCCTGGGAGGGCGTGGATGATGGTGGGAGAGGAGCCCCACTGTGGAAGTCTGACCCCCACATCGCCCCACCTTCCCCAG ....(((((..((.((((.((((.(((((...(((...((.....))...)))....)))))))))..))))))..))))) (-31.90)	182	80	10	2	90	hsa-mir-6785
SLC16A3 (2)	TCGGCTGGCGGGGGTAGAGCTGGCTGCAGGCCCGGCCCCTCTCAGCTGCTGCCCTCTCCAG ....((((.((((((((((((((.....(((...)))....)))))).)))))))).)))) (-30.70)	18	16	4	25	497	hsa-mir-6787
GPR108 (1)	CCAGACCCCTGGGGCTGGGCAGGCGGAAAGAGGTCTGAACTGCCTCTGCCTCCTTGGTCTCCGGCAG (((((((...(((((.((((((.((((......))))..))))))..)))))...)))))..))... (-28.70)	24.25	18	32	61	278	hsa-mir-6791
DNM2 (18)	GTCACTGTGGGTTCTGGGTTGGGGTGATACACAAGCCTGACCCTCCCCAACCCCTGCCCGCAG ....((((((((...(((((((((.....((......)).....)))))))))..)))))))) (-32.20)	108	136	29.83	115.33	3814	hsa-mir-6793
MAST1 (10)	GGGCGCAGGGGGACTGGGGGTGAGCAGGCCCAGAACCCAGCTCGTGCTCACTCTCAGTCCCTCCCTAG (((....((((((((((((((((((((((..........)))..)))))))))))))))))))))).. (-38.70)	90	76	1	6	80	hsa-mir-6794
NOTCH3 (21)	AGGGTTGGGGGGACAGGATGAGAGGCTGTCTTCATTCCCTCTTGACCACCCCTCGTTTCTTCCCCCAG .......((((((..(((((((.((..(((.............)))..)).)))))))..)))))).. (-26.02)	25	16	8	63	81	hsa-mir-6795
PLD3 (6)	TTACCTTGTGGGGTTGGAGAGCTGGCTGGTCCAGCCCCTCAGAAGCTCTCCCCTCCCCGCAG ......(((((((..(((((((((((((...))))).......))))))))...))))))). (-32.71)	50	50	5.33	26	2028	hsa-mir-6796
RPS19 (4)	CAGCCAGGAGGGAAGGGGCTGAGAACAGGACCTGTGCTCACTGGGGCCTGCATGACCCTTCCCTCCCCACAG ......(((((((((((........((((.(((((....)).))).)))).....)))))))))))...... (-32.12)	77.14	16	14	39	484	hsa-mir-6797
AP2A1 (4)	GAGGAGGGGAGGTGTGCAGGGCTGGGGTCACTGACTCTGCTTCCCCTGCCCTGCATGGTGTCCCCACAG .....(((((..((((((((((.((((...............)))).))))))))))...))))).... (-35.36)	147.33	117.33	17	54	9210	hsa-mir-6799
PPP2R1A (12)	TGGCCTGGTCAGAGGCAGCAGGAAATGAGAGTTAGCCAGGAGCTTTGCATACTCACCCCTGCCACTCACTGGCCCCCAG .((((.(((.((.(((((..((...((((.((.(((.....)))..))...)))))).))))).)).)))))))..... (-25.60)	40	11	6	4	965	hsa-mir-6801
PPP6R1 (3)	CTCCTCTGGGGGTGGGGGGCTGGGCGTGGTGGACAGCGATGCATCCCTCGCCTTCTCACCCTCAG .....(((((((((((((((.((((((.((.....)).))))...))..)))))).))))))))) (-32.40)	1	2	165	64	79	hsa-mir-6803
PPP6R1 (20)	GGATGTGAGGGTGTCAGCAGGTGACGGTGGGGGCCACGCTGACAGCCGCACCTGCCTCTCACCCACAG .....((.(((((...(((((((.(((((..(((...)))..)).))))))))))....))))).)). (-32.40)	54	42	7	3	525	hsa-mir-6804
RPL28 (4)	TGGCCTAGGGGGCGGCTTGTGGAGTGTATGGGCTGAGCCTTGCTCTGCTCCCCCGCCCCCAG .......((((((((...(((((((....((((...)))).)))))))....)))))))).. (-32.60)	768	155	0	7	194	hsa-mir-6805
DVL1 (2)	GGGGCCAGGCAGGGAGGTGGGACCATGGGGGCCTTGCTGTGTGACCACCGTTCCTGCAG ........((((((((((((...(((((........)))))...))))).))))))).. (-24.80)	2	2	30	80	86	hsa-mir-6808
TNS1 (1)	AATGTTGGCAAGGAAAGAAGAGGATCATGTTTGCCCCCGTGGACAGCTCTCTGGTGTGCTCCTCCTGCCATCCTGCCCACCCCTGCATAATGCTGCTTCTCTTCTCTCCTTCCCAG .....(((.(((((.(((((((((.((.((.(((....((((.(((......((((.((.......))))))))).))))....)))....)))).))))))))).))))).))). (-39.30)	103.92	32	1.26	20	3090	hsa-mir-6809
MLPH (4)	TATGCAGGCCTGTGTACAGCACTCAGGCAGTGCCATGAGCCTGTGCTTGTCCCTGCAG ..((((((.....((((((..(((((((...))).)))).)))))).....)))))). (-25.40)	122	32	1	4	193	hsa-mir-6811
PIGT (11)	TGAGGATGGGGTGAGATGGGGAGGAGCAGCCAGTCCTGTCTCACCGCTCTTCCCCTGACCCCAG ......((((((.....((((((((((((.((....)).))....))))))))))..)))))). (-29.30)	22	31	2.5	58	994	hsa-mir-6812
RGS19 (1)	GTAGGCAGGGGCTGGGGTTTCAGGTTCTCAGTCAGAACCTTGGCCCCTCTCCCCAG .......((((..((((((..(((((((.....))))))).))))))...)))).. (-27.40)	178	78	23	25	2668	hsa-mir-6813
RIPK4 (4)	TTTCCTCCCAAGGGTGAGATGCTGCCACCCAGCCCTGCAGAGCCCCTGACTCGCATCCTTCCCTTGGCAG ....((.(((((((...(((((.((......))....(((.....)))....)))))...))))))).)) (-22.10)	12	7	16	21	2382	hsa-mir-6814
COL18A1 (8)	CACTGTAGGTGGCGCCGGAGGAGTCATTTCCCATCACTAATGGCTTCTCTTGCACACCCAG ..(((..((((..((.((((((((((((..........)))))))))))).)).))))))) (-25.10)	216	53	5	12	361	hsa-mir-6815
TRMT2A (7)	CCGAGTGGGGCGGGGCAGGTCCCTGCAGGGACTGTGACACTGAAGGACCTGCACCTTCGCCCACAG ....((.(((((((((((((((...(((...........)))..)))))))).))..))))))).. (-32.40)	8	9	113	96	75	hsa-mir-6816
CRYBB2P1 (1)	AGGATTCTGCCATAGGAAGCTTGGAGTGGAACTGACCTGCCCCCTTTCTCTCTGACTCCATGGCAG ......(((((((.((.((.((((((.((((.............)))).))))))))))))))))) (-19.92)	7	1	10.5	168	7427	hsa-mir-6817
MTMR3 (9)	CTATTTTGTGTGAGTACAGAGAGCATCTGAATGGGTACAGTTGTTGTCTCTTGTTCCTCACACAG ......((((((((.((((((((((.(((........))).)))..))))).))..)))))))). (-22.20)	178	43	12	58	4120	hsa-mir-6818
MYH9 (34)	GAGGGTTGGGGTGGAGGGCCAAGGAGCTGGGTGGGGTGCCAAGCCTCTGTCCCCACCCCAG ......((((((((.((((..((..(((.(((.....))).)))..)))))))))))))). (-32.50)	19	4	5	42	1405	hsa-mir-6819
TTC21A (26)	TGGCCCAGGGAACCAGTTGGGGCTTCCGCTCTGCAGAGGCTCTAACTGGCTTTCCCTGCAG .....(((((((((((((((((((((.((...)).))))))))))))))..)))))))... (-34.60)	20	46	1	2	556	hsa-mir-6822
PFKFB4 (2)	CAAGGTCAGGGTTGGTAGGGGTTGCTGTTGCTGTGAAAGCTGAGCCTCTCCTTCCCTCCAG ...((..((((..((.(((((((((....)).((....))..)))))))))..)))))).. (-21.20)	45	40	0	4	157	hsa-mir-6823
CELSR3 (36)	GAGGTGTAGGGGAGGTTGGGCCAGGGATGCCTTCACTGTGTCTCTCTGGTCTTGCCACCCCAG ........((((.(((.((((((((((.((.........)).)))))))))).))).)))).. (-30.30)	23	25	12	14	6038	hsa-mir-6824
TPRA1 (8)	GGGCATGGGGAGGTGTGGAGTCAGCATGGGGCTAGGAGGCCCCGCGCTGACCCGCCTTCTCCGCAG ..((..(((((((.((((.((((((.(((((((....))))))).))))))))))))))))))).. (-43.30)	452	163	1	4	137	hsa-mir-6825
COPG (19)	CTTGGTCAATAGGAAAGAGGTGGGACCTCCTGGCTTTTCCTCTGCAGCATGGCTCGGACCTAGTGCAATGTTTAAGCTCCCCTCTCTTTCCTGTTCAG .......(((((((((((((.((((.......((((......((((....((......))...))))......)))))))).)))))))))))))... (-30.61)	41.58	48.5	20	8	334	hsa-mir-6826
AMOTL2 (2)	TCTGGTGGGAGCCATGAGGGTCTGTGCTGTCTCTGAGCACCGTCTCTTCTGTTCCCCAG .(((..((((((...(((((...(((((.......)))))...)))))..))))))))) (-20.90)	54.5	22	1.5	15	2896	hsa-mir-6827
CLDN11 (1)	GGCTCAGGAAGCAAGAGAACCCTGTGGTCTAACCTTTCCCATCTGCTCTCTTGTTCCCAG ......((.(((((((((.....((((...........))))....))))))))).)).. (-16.10)	44	8	0	5	3870	hsa-mir-6828
TNK2 (5)	CAGCGTGGGCTGCTGAGAAGGGGCAGGGTCCTCCAGCTCATTCCTCCTGCCTCCTCCGTGGCCTCAG .....((((((((.(((..(((((((((................)))))))))))).)))))).)). (-26.99)	80	100	1	6	828	hsa-mir-6829
P4HA2 (2)	GTGCCCCAAGGAAGGAGGCTGGACATCCCTCATCTGTTTCTCACTGGTGTCTTTCTTCTCTCCCTTGCAG ......(((((.((((((..(((((((..................)))))))..)))).)).)))))... (-18.97)	39	9	6	1	696	hsa-mir-6830
PRRC2A (17)	GGTGGAGTAGAGAGGAAAAGTTAGGGTCAGTGGCAGAGCCAGGCAGATGCTGACCCTTTTTCTCTTTCCCAG ..(((...((((((((((....(((((((((.((........))....))))))))))))))))))).))). (-27.30)	235.33	27	5	33	211	hsa-mir-6832
RNF5 (3)	AAACGGTGTGGAAGATGGGAGGAGAAAAATCCCTGTTAACTTTCTCTCTCCACTTCCTCAG ......((.(((((.(((..(((((((.............)))))))..)))))))).)). (-21.02)	105.5	28	18.2	69	113	hsa-mir-6833
HMGA1 (2)	TGATGAGGGGGTAGAAAGTGGCTGAAGCGAGATGTTTGTCTAAAAGCACTTTTCTGTCTCCCAG ......((((((((((((..(((......((((....))))...)))..))))))).))))).. (-20.40)	47	28	1	2	3419	hsa-mir-6835
SNX8 (8)	GGCTCCGCAGGGCCCTGGCGCAGGCATCCAGACAGCGGGCGAATGCCTCCCCCGGCCCCGCAG ......((.(((((..((...((((((((........))...)))))).))..))))).)).. (-24.10)	33	19	3	35	220	hsa-mir-6836
POLM (10)	CAGGGAAGCAGCAGTGGCAAGACTCCTAGGTCACGGAAGTCCTGCTTCTGTTGCAG .......(((((((.((((.((((((........))).))).)))).))))))).. (-24.50)	69	57	21.5	44	247	hsa-mir-6838
ZNF107 (2)	TGTAGTCTGGATTGAAGAGACGACCCAAGCAGGCTTTGTGTGAGCAGTGAGGCTATTTATTCACTTGGGTGCGAGCTCACACGAAGCCTGCTTGGGTTTTCTCTTCAATCCAG ......((((((((((((((.((((((((((((((((((((((((((((((........)))))).........)))))))))))))))))))))))).)))))))))))))) (-75.80)	711	270	6	8	9998	hsa-mir-6839
NEFL (2)	GTGTTTAGGGTACTCAGAGCAAGTTGTGAAACACAGGTGTTTTTTAACCTCACCTTGCATCTGCATCCCCAG .......(((....(((((((((..((((......(((........)))))))))))).))))....))).. (-19.90)	85.5	5	0	6	385	hsa-mir-6841
PTK2B (15)	AGCCCTGGGGGTGGTCTCTAGCCAAGGCTCTGGGGTCTCACCCTTGGCTGGTCTCTGCTCCGCAG ....((((((((((...((((((((((...(((....))).))))))))))...))))))).))) (-30.60)	20	16	126	1127	1073	hsa-mir-6842
NRBP2 (6)	AACTGCGGGGCCAGAGCAGAGAGCCCTTGCACACCACCAGCCTCTCCTCCCTGTGCCCCAG ......((((((((((.((((.((...((.....))...)))))).)))..)).))))).. (-21.00)	35	16	1.33	8	924	hsa-mir-6845
OPLAH (10)	CAGGCTGGGGGCTGGATGGGGTAGAGTAGGAGAGCCCACTGACCCCTTCTGTCTCCCTAG ......(((((.((((.(((((..(((.((....)).))).))))).)))).)))))... (-25.40)	61	35	2	8	127	hsa-mir-6846
EXOSC4 (1)	GACCCACAGAGGACAGTGGAGTGTGAGCTGGAAGGAGTGGGCCTGGCTCATGTGTCTGTCCTCTTCCAG .......(((((((((....(((((((((...(((......))))))))))))..)))))))))..... (-25.70)	228.5	55.5	8	2	1043	hsa-mir-6847
DGAT1 (13)	GTCCCTGGGGGCTGGGATGGGCCATGGTGTGCTCTGATCCCCCTGTGGTCTCTTGGCCCCCAGGAACTCC ((.(((((((((..(((..((((((((...............)))))))))))..))))))))).))... (-37.76)	43	19	1	17	80	hsa-mir-6848
CPSF1 (8)	CCTGGGAGTGGATAGGGGAGTGTGTGGAGAGAGCACTGAGCCTGCCCACCAGCCTGTGTCCACCTCCAG .((((..(((((((.(((..((.((((..((.((.....))))..)))))).))).)))))))..)))) (-34.80)	25	19	2	24	77	hsa-mir-6849
NOL6 (11)	CAGGGAGGAGGTGGTACTAGGGGCCAGCAACCTGATTACCCCTCTTTGGCCCTTTGTACCCCTCCAG ......(((((.(((((.(((((((((..................))))))))).)))))))))).. (-32.17)	122	122	32	11	161	hsa-mir-6851
TLN1 (32)	TGCTGCCCTGGGGTTCTGAGGACATGCTCTGACTCCCCTGATGTCCTCTGTTCCTCAGGTGCTGGG ..(((((((((((....((((((((...............))))))))....))))))).)).)). (-26.96)	703.08	226.75	0	54	113	hsa-mir-6852
CREB3 (1)	GGGAAAGCGTGGGATGTCCATGAAGTCAGGTGATGGTGATAAGGTCAAGGCCTGTTCATTGGAACCCTGCGCAG ......(((..((...((((((((..(((((..(((........)))..)))))))))).)))..))..))).. (-27.00)	4	1	9	91	94	hsa-mir-6853
TBC1D2 (4)	AAAGCAAGCTCAGGTTTGAGAACTGCTGATGTCATCAGTCATAACTTCTGCGTTTCTCCTCTTGAGCAG .......(((((((...(((((.(((.((.((.((.....)).)).)).))).)))))..))))))).. (-20.90)	34	1	3	14	4267	hsa-mir-6854
USP20 (13)	GCTGCTTGGGGTTTGGGGTGCAGACATTGCCAGAGGATGGGCAGCAGACTGACCTTCAACCCCACAG .(((..(((((((..((((.(((...(((((........)))))....)))))))..)))))))))) (-27.40)	32	14	145	145	246	hsa-mir-6855
SMC1A (10)	GCTTGTTGGGGATTGGGTCAGGCCAGTGTTCAAGGGCCCCTCCTCTAGTACTCCCTGTTTGTGTTCTGCCACTGACTGAGCTTCTCCCCACAG ...((.((((((..((.((((..(((((....(((((........(((......))).....)))))..))))).)))).))..)))))))). (-29.12)	14	10	17	127	98	hsa-mir-6857
WASH7P (1)	TGTGGGAGAGGAACATGGGCTCAGGACAGCGGGTGTCAGCTTGCCTGACCCCCATGTCGCCTCTGTAG ......(((((.(((((((.(((((..(((........)))..)))))..)))))))..))))).... (-29.20)	44.16	37	2.04	3.5	237	hsa-mir-6859
C12orf51 (67)	GAGGCACTGGGTAGGTGGGGCTCCAGGGCTCCTGACACCTGGACCTCTCCTCCCCAGGCCCACA ..(((.(((((.(((.((((.((((((..........)))))))))).))).)))))))).... (-37.00)	22	11	0	45	277	hsa-mir-6861
EIF3C (10)	CGAAGCGGGCATGCTGGGAGAGACTTTGTGATTTGTCTCCAAAGCCTCACCCAGCTCTCTGGCCCTCTAG ...((.((((..((((((.(((.(((((.((......))))))).))).))))))......)))).)).. (-30.80)	145.64	38.29	4.5	0	770	hsa-mir-6862
CAMTA2 (18)	GAAAGTTGAAGGGACAAGTCAGATATGCCATTATGTGGGTCATGAGGTGGTGAGACTTCTCTCCCTTCAG ......((((((((.(((((.....((((.(((((.....)))))))))....)))))...)))))))). (-23.20)	82	15	0	7	200	hsa-mir-6864
CAMTA2 (17)	ATCCATAGGTGGCAGAGGAGGGACTTCAGATGCTTCATGACACCCTCTTTCCCTACCGCCTACAG .....(((((((.(((((((((...(((((....)).)))..)))))))...)).)))))))... (-23.00)	69.5	47	1	2	254	hsa-mir-6865
CASC3 (4)	CCATTTTAGAGGCTGGAATAGAGATTCTTGAGGCTTGGAAGAGTAAGGATCCCTTTATCTGTCCTCTAG ......((((((.((((..((.((((((((...((....))..)))))))).))...)))).)))))). (-19.90)	455.5	63	4	40	90	hsa-mir-6866
RAPGEFL1 (14)	CCCGGTGTGTGTGTAGAGGAAGAAGGGAAGCTGGGAACCTGACTGCCTCTCCCTCTTTACCCACTAG ...((((.(((...(((((.((.(((..((..((....))..)).))))).))))).))).)))).. (-21.40)	108	36	0	3	246	hsa-mir-6867
EXOC7 (2)	CCAGGACTGGCAGAACACTGAAGCAGCAGGCACCTGCTTCCTTCTGTTGTCTGTGCAG ......((((((((..((.((((.(((((....)))))..)))).))..))))).))) (-20.50)	4	0	43	79	3252	hsa-mir-6868
JAG1 (1)	CAAGGTGGGGGAGATGGGGGTTGAACTTCATTTCTCATGCTCATCCCCATCTCCTTTCAG .....(((((((((((((((.(((....(((.....))).)))))))))))))))).)). (-23.50)	5	1	24	40	611	hsa-mir-6870
PLCG1 (4)	CTCCTCATGGGAGTTCGGGGTGGTTGCTGGAGGTCAGCACCCTGTGGCTCCCACAG .......((((((((((((((....((((.....)))))))))).))))))))... (-25.60)	44	41	9	25	208	hsa-mir-6871
SEMA3B (6)	GTGGGTCTCGCATCAGGAGGCAAGGCCAGGACCCGCTGACCCATGCCTCCTGCCGCGGTCAG .......((((..(((((((((.((.(((......)))..)).)))))))))..)))).... (-27.00)	36	23	5	1	1817	hsa-mir-6872
WDR46 (6)	CCCAGCAGAGGGAATACAGAGGGCAATCAGGACTGGGTCATTCTCTCTGTCTTTCTCTCTCAG ......((((((((.((((((((.(((...(((...))))))))))))))..))))))))... (-20.90)	26	24	10.5	11.33	128	hsa-mir-6873
RNF216 (11)	GCCACATGGAGCTGGAACCAGATCAGGCTTTAATGTTTGAAGTAATGTCAGTTCTGCTGTTCTGACTCTAG ......(((((..(((((((((((((((......))))))............))))..)))))..))))). (-17.90)	53	21	26	11	875	hsa-mir-6874
TRIP6 (2)	GAGTCTGAGGGACCCAGGACAGGAGAAGGCCTATGGTGATTTGCATTCTTCCTGCCCTGGCTCCATCCTCAG ....((((((((.(((((.((((((((.((..((....))..)).)))).)))).))))).)))...))))) (-29.40)	476.83	130.33	7	6	119	hsa-mir-6875
DOCK5 (25)	AGTTGCAGGAAGGAGACAGGCAGTTCAGGAGGTGGCACTGCTGTGTGTGAGCTGTCTGTGTTTTCCTTCTCAG .......((((((((((((((((((((.......((((....)))).))))))))))))...))))))))... (-28.20)	57	41.5	7	0	2967	hsa-mir-6876
GTF3C5 (3)	AGTTCAGGGCCGAAGGGTGGAAGCTGCTGGTGCTCATCTCAGCCTCTGCCCTTGGCCTCCCCAG ......(((((.(((((..((.((((..(((....))).)))).))..))))))))))...... (-30.20)	526	269	0	4	1081	hsa-mir-6877
TARS2 (5)	ATGAGAGGGAGAAAGCTAGAAGCTGAAGATTCTGAAAATCACTAACTGGCCTCTTCTTTCTCCTAG ......(((((((((..(((.(((..((....((.....))....))))).))).))))))))).. (-17.40)	145	16	2	7	748	hsa-mir-6878
ARL2 (2)	CAGAGCAGGGCAGGGAAGGTGGGAGAGGGGCCCAGCTGACCCTCCTGTCACCCGCTCCTTGCCCAG .......(((((((((.(((((.((((((..........)))).)).)))))...))))))))).. (-33.80)	7.5	10	12	26	96	hsa-mir-6879
NCOR2 (1)	GAGGGTGGTGGAGGAAGAGGGCAGCTCCCATGACTGCCTGACCGCCTTCTCTCCTCCCCCAG ..(((.((.((((((((.((((((.((....))))))))......)))).)))).))))).. (-29.00)	16.2	36	4	33	2825	hsa-mir-6880
SEMA7A (12)	TGCACTGGGGTAAGGATAGGAGGGTCAGGTCTGCAGCCTTGTATCTGCTGATCCTCTTTCGTCCTTCCCACTCCAG ....((((((((((((((((((((((((...(((......)))....)))))))))))..))))))...))))))) (-32.40)	28	25	21	3	199	hsa-mir-6881
ULK3 (4)	GGCTTTACAAGTCAGGAGCTGAAGCAGCTGGAATTCAAGCCCTGCTGCCTCTCCTCTTGCCTGCAG .........((.((((((..((.(((((.((.........)).))))).))..)))))).)).... (-21.50)	1172	303	14	5	763	hsa-mir-6882
PER1 (16)	CAGACAGGGAGGGTGTGGTATGGATGTGTTGACCCCTGAAGTGGTTCTGATGACCTTTCCCTATCTCACTCTCCTCAG ......(((((((((.((((.(((...(((((((........)))).....)))...))).)))).)))))))))... (-25.30)	13	5	25.5	12	964	hsa-mir-6883
MED24 (14)	CCCGCAGAGGCTGAGAAGGTGATGTTGGCTCAAGAAAGGGAGATAGATGGTAGCCCATCACCTTTCCGTCTCCCCTAG ......(((((.(((.((((((((..((((.....................))))))))))))))).)))))...... (-23.60)	476.2	52.5	3	2	315	hsa-mir-6884
GTF2F1 (1)	CCTGGAGGGGGGCACTGCGCAAGCAAAGCCAGGGACCCTGAGAGGCTTTGCTTCCTGCTCCCCTAG .....(((((((((......((((((((((.((....))....))))))))))..))))))))).. (-31.60)	385	40	3	50	2264	hsa-mir-6885
LDLR (9)	CTTGGCCCGCAGGTGAGATGAGGGCTCCTGGCGCTGATGCCCTTCTCTCCTCCTGCCTCAG ........(((((.((((.((((((((........)).)))))).))))..)))))..... (-25.30)	144	109	8.25	6	85	hsa-mir-6886
FXYD3 (5)	GAGAATGGGGGGACAGATGGAGAGGACACAGGCTGGCACTGAGGTCCCCTCCACTTTCCTCCTAG .....((((((((.((.(((((.((((.(((.......)))..)))).))))))).)))))))). (-32.20)	25.5	14	10	34	1519	hsa-mir-6887
TANC1 (15)	GTGGGAAGGAGATGCTCAGGCAGATCTGTCTCTGATTGTTTCCAAGATCTGTCTCGATTGTTTCCAG .......((((((..((((((((((((.................)))))))))).))..)))))).. (-22.33)	9	6	5	57	1002	hsa-mir-6888
QARS (13)	TGGGCCATGGGGTAGGGCAGAGTAGGGCTGGATGGTAGGGCCCACTGCCTATGCCCCACAG .......(((((((((((((....(((((.........))))).)))))).)))))))... (-28.30)	76	33	1	2.5	107	hsa-mir-6890
TONSL (17)	CCGGGCAGGCAGGTGTAGGGTGGAGCCCACTGTGGCTCCTGACTCAGCCCTGCTGCCTTCACCTGCCAG ...((((((.(((((((((((((((((......)))))).......))))))).))))...)))))).. (-37.51)	30.5	20	1	10	107	hsa-mir-6893
KDM5C (15)	CAAGAAGGAGGATGGAGAGCTGGGCCAGACATGCTCTTGCCTGCCCTCTTCCTCCAG ......((((((.((((.((.((((.(((.....))).)))))).)))))))))).. (-26.30)	63	48.5	10	90	88	hsa-mir-6894
KDM5C (20)	CAGCTCAGGGCCAGGCACAGAGTAAGCATCAATAGCATTGGCAAGTTGAACTGAGCTGTCTCTCGCCCTTGGCCTTAG ..(((.(((((.(((.((((....((..(((((.((....))..))))).))...)))).))).))))).)))..... (-24.90)	33	10	25	13	505	hsa-mir-6895
PDIA5 (16)	GGGGCTGGGGGTGTGGGGAGAGAGAGTGCACAGCCAGCTCAGGGATTAAAGCTCTTTCTCTCTCTCTCTCTCCCACTTCCCTGCAG ...((.(((((.((((((((((((((.((.......))..(((((...........)))))))))))))).))))).))))))).. (-38.80)	7	8	15	29	424	hsa-mir-7110
RPL10A (5)	CTGGGGGAGGAAGGACAGGCCATCTGCTATTCGTCCACCAACCTGACTTGATCCTCTCTTCCCTCCTCCCAG ((((((((((.((((.(((..(((.........................)))))).)))).))))).))))) (-23.81)	59.17	35.5	22	125	228	hsa-mir-7111
BOP1 (11)	ACGGGCAGGGCAGTGCACCCTGCAGGTGAGAGCGGGAACACCTGCATCACAGCCTTTGGCCCTAG ..((((.((((.(((.....((((((((..........)))))))).))).))))...))))... (-28.40)	8	8	9.5	53	180	hsa-mir-7112
NDUFS8 (3)	CTCCAGGGAGACAGTGTGTGAGGCCTCTTGCCATGGCCTCCCTGCCCGCCTCTCTGCAG ((.(((((((...(((.((((((((.........))))))...)).)))))))))).)) (-22.40)	113.25	45.5	10	5	586	hsa-mir-7113

## Sheet: Human mirtron
Gene (Intron)	Fold; ΔG (kcal/mol)	5p reads		3p reads		Intron length	miRBase ID	Failed Criteria
		Perfect	Tailed	Perfect	Tailed
Known Human mirtron
VWA5B2 (18)	GTGAGGACTCGGGAGGTGGAGGGTGGTGCCGCCGGGGCCGGGCGCTGTTTCAGCTCGCTTCTCCCCCCACCTCCTCTCTCCTCAG .((((((...(((((((((.(((.((.((..(((....)))..((((...))))..)).)).))).)))))))))...)))))). (-45.00)	4350	3004	6.38	58	85	hsa-mir-1224
DHX30 (21)	GTGAGGGCATGCAGGCCTGGATGGGGCAGCTGGGATGGTCCAAAAGGGTGGCCTCACCAGCCCTGTGTTCCCTAG ...((((.(((((((.((((.((((((.(((.((.....)).....))).)))))))))).))))))).)))).. (-36.90)	202	162	282	1210	75	hsa-mir-1226
PLEKHJ1 (4)	GTGGGGCCAGGCGGTGGTGGGCACTGCTGGGGTGGGCACAGCAGCCATGCAGAGCGGGCATTTGACCCCGTGCCACCCTTTTCCCCAG .(((((..(((.((((((((((((((((...((((((......))).)))..))))).....)).)))...)))))))))..))))). (-36.70)	2	3	13	283	88	hsa-mir-1227
LRP1 (49)	GTGGGCGGGGGCAGGTGTGTGGTGGGTGGTGGCCTGCGGTGAGCAGGGCCCTCACACCTGCCTCGCCCCCCAG ..((((.((((((((((((....((((.....(((((.....))))))))).))))))))))))))))..... (-46.00)	805	53	169	98	73	hsa-mir-1228
MGAT4B (10)	GTGGGTAGGGTTTGGGGGAGAGCGTGGGCTGGGGTTCAGGGACACCCTCTCACCACTGCCCTCCCACAG (((((.(((((.(((..(((((.(((..(((.....)))...))).))))).)))..)))))))))).. (-36.00)	187	31	115	206	69	hsa-mir-1229
GOLGA8A (9)	GTGAGTGGGAGGCCAGGGCACGGCAGGGGGAGCTGCAGGGCTATGGGAGGGGCCCCAGCGTCTGAGCCCTGTCCTCCCGCAG ....((((((((.((((((....((((....((((..(((((........))))))))).)))).)))))).)))))))).. (-46.50)	0.57	0.57	0.53	16.26	82	hsa-mir-1233-1	5p + 3p reads: < 50
RDBP (3)	GTGAGTGACAGGGGAAATGGGGATGGACTGGAAGTGGGCAGCATGGAGCTGACCTTCATCATGGCTTGGCCAACATAATGCCTCTTCCCCTTGTCTCTCCAG ..(((.((((((((((..((.(((((.........(((((((.....)))).)))))))).((((...))))........))..))))))).))).)))... (-37.90)	113	47	4.5	31.5	102	hsa-mir-1236
ATG4D (8)	GTGAGTGGGAGCCCCAGTGTGTGGTTGGGGCCATGGCGGGTGGGCAGCCCAGCCTCTGAGCCTTCCTCGTCTGTCTGCCCCAG .....((((.((..(((((...((...((((((.(((((((.....)))).)))..)).)))).)).)).)))...)))))). (-30.90)	1	0	7	1	83	hsa-mir-1238	Star like reads: 1
ZYX (3)	GTAAGGGACCGGAGAGTAGGAAAAGCAGGGCTCAGGGCCAGAGAGACTGGGCATAGAACTAAGGAGGATGGTGTCCTCCTGACTGCATCTCTCTTCCCTCTCCCACCCCTTGCAG (((((((...((((((..(((.......(((.....))).((((((....(((........((((((((...))))))))...))).)))))).)))))))))...))))))).. (-48.90)	287	54	4	6	115	hsa-mir-6892
ABCF1 (13)	GTAGAGGAGATGGCGCAGGGGACACGGGCAAAGACTTGGGGGTTCCTGGGACCCTCAGACGTGTGTCCTCTTCTCCCTCCTCCCAG ...((((((..((...((((((((((.........(((((((((.....)))))))))...))))))))))...)))))))).... (-35.80)	20349.8	18786.3	109.81	479.68	86	hsa-mir-877
Novel Human mirtron
JAG2 (3)	GTGAGGCGGGGCCAGGAGGGTGTGTGGCGTGGGTGCTGCGGGGCCGTCAGGGTGCCTGCGGGACGCTCACCTGGCTGGCCCGCCCAG .((.(((.(((((((..(((((.(((.((..((..(((((....)))...))..))..))...))).)))))..)))))))))))). (-51.60)	28	2	5	53	87	hsa-mir-6765
PLEKHJ1 (2)	GTAGGGGCGTCCCGGGCGCGCGGGCGGGTCCCAGGCTGGGCCCCTCGGAGGCCGGGTGCTCACTGCCCCGTCCCGGCGCCCGTGTCTCCTCCAG ..(((((((...(((((((.((((((((...(((..(((((.((.(((...))))).)))))))).)))).))))))))))))))).))).... (-51.30)	11	24	2	24	94	hsa-mir-6789
MED25 (11)	GTAGGTGACAGTCAGGGGCGGGGTGTGGTGGGGCTGGGGCTGGCCCCCTCCTCACACCTCTCCTGGCATCGCCCCCAG ...(((((..((((((((..((((((((.((((..((((....)))))))))))))))))))))))).)))))..... (-44.10)	22	7	20	40	78	hsa-mir-6800
TRIM28 (16)	GTGAGCCAGTGGAATGGAGAGGCTGTGGGCAGGGGGAGATGTGAAGGAAAGAACTAGGACCCATTCATCCACTGCATTCCTGCTTGGCCCAG .((.((((((((((((.((.((..(((((...(((.....((..........)).....))).))))))).)).)))))).))).))).)). (-28.20)	330.45	147.5	9	53	92	hsa-mir-6807
PIM3 (5)	GTGCGTGGTGGCTCGAGGCGGGGGTGGGGGCCTCGCCCTGCTTGGGCCCTCCCTGACCTCTCCGCTCCGCACAG (((((..((((...(((((((((...(((((((.((...))..)))))))))))).)))).))))..))))).. (-43.90)	58	15	1	6	74	hsa-mir-6821
APBB3 (1)	GTAGGTAGAGTGTGAGGAGGAGGTCTGAGCCCATGTGTGGACCTAGGTCTGCTGTTAAACTGACTAACTCCCACTCTACAG ....((((((((...((((..((((...........((((((....)))))).........))))..)))))))))))).. (-30.65)	46	41	0	4	81	hsa-mir-6831
PFDN6 (3)	GTGAGGGACTGGGATTTGTGGGGCGAGGAGGGACCTGTACTAGCCATGGTTCTGATCACATATGTCCCATCCCTCCATCAG ..((((((.((((((.((((....((...((((((((.......)).))))))..)).)))).))))))))))))...... (-31.50)	85	50	16	8	81	hsa-mir-6834
TATDN1 (7)	GTGAGTTAAAACCAAAGTCTCATTCAGAACTTAAGAATTTTGTAGAAATCAAGCTATTTGCTAAAAGTTCTTTGTTTTTAATTCACAG (((((((((((.(((..........(((((((.((......((((........))))...))..)))))))))).))))))))))).. (-17.80)	12	0	186.7	68.7	88	hsa-mir-6844
LMNB2 (5)	GTGTGGCCGGCAGGCGGGTGGGCGGGGGCGGCCGGTGGGAACCCCGCCCCGCCCCGCGCCCGCACTCACCCGCCCGTCTCCCCACAG .(((((..(((.(((((((((((((((((((..((((((...))))))))))))).)))))......))))))).)))...))))). (-60.70)	53.5	36	3	17	87	hsa-mir-7108

## Sheet: Human 3p tailed candidate
Gene (Intron)	Fold; ΔG (kcal/mol)	5p reads		3p reads		Intron length	miRBase ID	Failed Criteria
		Perfect	Tailed	Perfect	Tailed
Human 3p tailed mirtron candidate
CCHCR1 (2)	GTCAGTGGGACCAGACAAGGGGAGTGGTGGTTGTCTCTGCCTGGGAAACTGACCATCT ((((((....((((.((..((.((......)).))..)).))))...))))))..... (-18.10)	3	1	18	8	186
DCXR (6)	CAAGGTGAGCAGGGCTGGGGTACCTCCCCCAACCTAGGACACCCCACTTGCCCTGCTGACCCCAG ...(((.((((((((((((((...(((.........))).))))))...)))))))).))).... (-33.30)	6	4	25	13	75
FAM64A (1)	GTGAGTGCGGGCTGGGCACAAGTTTCGCCCTTGTTGCCCAGGCTGGAGTGCAATGGCGCGATCT .......(((.(((((((((((.......))))).)))))).)))..((((....))))..... (-27.00)	261	69	0	4	587
FLAD1 (5)	GTACTAGGGGCCTGGAGGTTTGGGCTCCAAGAGAAGCTTGACAGAGCCCACGCCCGACCCCTACTTCT ....((((((..((..(((.(((((((((((.....))))...))))))).))))).))))))..... (-27.80)	26.33	20	4	3	81
MIB2 (15)	GTGCGGACGCGGCCCAGTCCTGCCCAAGGACCGGGGAGCGGGAGGCCCACTGGGGTCCCTGGGCTGAGCCCGTCCCCACCCCTCCCCAG (((.(((((.(((.((((((..(((.......)))....(((.(((((....)))))))))))))).)))))))).))).......... (-43.70)	14	3	2	1	89
NAV1 (18)	GTCAGTGTCTGGGCGGACAGCTGCAGGAAAGGGAAGACCAAGGCTTGCTGTCTGTCCAGTCTGC ..(((...(((((((((((((.((......((.....))...))..))))))))))))).))). (-30.10)	13	2	1	0	92	hsa-mir-1231	Dicer cleavage inconsistent
PLEC (27)	GTGGGCTTGGGTCGGTGGGGACGGGGCGGCTGGGCGTGCCCTGCGGCCACGGCTCTGACCAC ((((....((((((.((....)).(((.((.(((....))).)).))).))))))...)))) (-31.10)	62	34	45	18	74
SLC25A39 (11)	GTGTGTGGGTGTCGGGGGTGGGGGCATGGCGGACCTGCGACCTGACCCCTGACACGGGCCT ....((..(((((((((((.((((((.((....)))))..))).)))))))))))..)).. (-32.30)	5.2	0	25	48	79
TOMM40 (5)	GTGAGTGGGGCACGGAGGCTGCTGCTCCCCTCGGCCACCGTGAGCAGGGAGCCGCCCTCACACCCCCTCCTCTCCACAG (((((.((((....((((..((.((((((((((.......))))..)))))).))))))....))))....))).)).. (-33.50)	12	16	2	1	79
VIPR1 (11)	GTATGGGCTGTTGACTTAAGGCTGCATTCTTCCCTGGCTTTTAAGGGAATTCAACCTGGAGTCT ............(((((.(((.((.....((((((........))))))..)).))).))))). (-17.30)	30	1	3	0	238

## Sheet: Human 5p tailed candidate
Gene (Intron)	Fold; ΔG (kcal/mol)	5p reads		3p reads		Intron length
		Perfect	Tailed	Perfect	Tailed
Human 5p tailed mirtron candidate
ABCA2 (25)	TGCAGGTGGTGGAGGTGGGCGCACTCCTGCCTGGGCGTCCCTGCCGCAGCCTCCCCCTCCACCGCCCCTGCAG (((((((((((((((.(((.(((....)))(((((((....)))).)))...))))))))))))))..)))). (-39.50)	3	7	1	3	102
ABR (21)	ACAGGCTGGAGTCAGCAAGGACGAGGCCTAGGACAGGGAGCCCAGCCTCCGCCTTCCTGTCTCCCCACAG ...((..((((.(((.((((..(((((...((........))..)))))..)))).))).)))))).... (-27.50)	154.5	116.5	0	2	995
ACAD8 (6)	AGCGGTCCGGGACAGGCACTGCTGTTTTCCAGCTTGGTTGGAACGTCGGCGCTCTTCCCCTCTAG ........((((..(((.(((.(((..((((((...))))))))).))).)))..))))...... (-21.40)	74	3	0	15	95
ACAP3 (1)	CTGAGTGGCCGTGTGTGGTGGCGAGTGCAGGCGCCAGTGCCCACTGTGCTCACCACGCCCCGCTGGCCCACAG ....(((((((((((((((((((((((..((((....)))))))).))).))))))))...)).)))).)).. (-35.00)	15.83	5	8.5	7	804
ADAMTS10 (6)	GGTCAGTGGGGAGGGCGGTTTCAGCATGACTAGAATTCTGAACCCTGCATCGTCCCCCAG .......(((((((((((.(((((.((.......)).))))).)).)).)).)))))... (-18.40)	2	2	21	17	94
ANKRD13D (14)	TCTGGCCTCTGCAGCCACACGGCAGAAGTGACAGCTGTGGGCTCTGGTGGCTGCAG ........((((((((((..(((...(((....)))....)))...)))))))))) (-25.10)	0	0	0	0	80
ANKRD24 (15)	GACACACGGGGGCTGAGAGCAGAACCCCGAGCTGGACTCTGCTCCCTCCCCCCAG .......(((((....(((((((..((......))..)))))))....))))).. (-24.40)	23	6	3	9	3279
ARFGAP3 (11)	GAGCCCAGGACGAGTGTCAACAAGGACCTCCAAAGTCACTGTTGTACTCTTGCTCCTACAG ......((((((((.(((((((..(((.......)))..))))).)).)))).)))).... (-18.70)	12	3	9	0	6197
ARHGAP25 (10)	GCAAGGGGGAAGGAAGAGTCTAGAATGAATGCCACATTCTTTCATTCTTTTCTTTCCTTCCTTGTAG ((((((((((((((((((....(((.(((((...))))).)))...)))))))))))).)))))).. (-28.50)	15	3	11.25	13	3114
ARHGDIG (5)	AACGGGGCGGGGGGGGGAAGCGGGGGCAGACAGAGGACAGCTCTGATGCCCTCGCCCTCCCTAG ..........(((((((..(((((((((..(((((.....))))).)))))))))))))))).. (-37.60)	0	0	1	19	84
ARPC1B (6)	CATCCCCAGGGGAGGAGGTGAGTGCAGAGGAGTGGGACACCGTGACTCACAGCTCTCTCCCCTCAG ........((((.(((((.((((...(((..((((....))))..)))...))))))))))))).. (-26.90)	66.5	33	8	29	78
ARRB2 (7)	GGGGGAGGAGTAGGGTTGGGGTGTGTGAGGAATGACCCCTCCTGCCCCTACTCTGATCCCAG ((((..(((((((((..(((((.(((.....))))))))......)))))))))..)))).. (-31.00)	5.5	6	22	52	135
ATG2A (17)	GCCAGCAGGGCGGGACTGGACACTGGGTGGGCCTGGCCTCCCTTACCTGCTGTCCACCCGCCTATCTCAG .......(((((((..((((((..(((((((........)))..))))..)))))))))))))....... (-31.00)	19.5	16	3	1	83
ATP2A3 (6)	CCTAGTGGGCCAGGACTAAGGGATGGGCGTGTCTTCATGTGGGGCTTCTCATCTCTGATTCCCTGACCAG .....(((..((((....(((((((((...(((((.....)))))..))))))))).....)))).))). (-24.60)	136.5	116	0	2	96
B4GALT2 (5)	TGGGGGGGGGAGGGGGGGTGCAGACTGGGTGGGGTTCTTTGCCCTTCCTGGAGCCTGTTCCAGTCTGTCCGTCCCCATCCTCAG (((((((((((.((.....((((((((((..(((((((...........)))))))..)))))))))))).))))).)))))). (-46.70)	0.5	37	2	27	116
BCAT2 (6)	ACGGCGGTGCTAGGGGGTGAGAGGTAACATCTTCCACCCCTTACACCTGCCCTAG ..(((((((.(((((((((.((((......))))))))))))))))).))).... (-31.30)	0	1	12	12	168
BCR (14)	ATGTGGGTGATGTGGAAAAGACCTGTGACCTTCTCCATGTCCACTTCTCCCCACAG .((((((.((.(((((..(((..........))).....))))).))..)))))). (-17.40)	30	9	3	4	2127
BIN1 (11)	CTCTGTGCAGGGCTGGAGGTGGGACGGAAGGTCTGACTTGCGATCCGCATCCTCTGCAG .....((((((...(((.(((((.((.(((......))).)).))))).))))))))). (-23.60)	4	1	2	16	279
BRD8 (8)	GCTTTGTTGGGAAATGGTAGTGAAGGAAAGCTTGAGTGTAGCCTTCACCTCTATTCTTCCCTGGTAG (((.....(((((((((..(((((((...((....))....)))))))..)))))..)))).))).. (-22.40)	118.5	16	2	0	1143
C11orf51 (5)	CAGGATCTGGGGCTGAGGCTGGCTGAGGCCCCTCCCCACCCACACCCAGCCTCCTCTCCAG ......((((((..((((((((.((.((...........)).)).))))))))..)))))) (-26.70)	48.09	43	0	11	159
C12orf43 (6)	GGAGGACAGCGAGAGGCAGCTCTGGGGCTGTGTCCTGACTCCAGCTAACCCAGGGTACCCTCTCGTTGCAG ......((((((((((..((((((((((((.((....))..))))...))))))))..))))))))))... (-35.70)	242.83	205.17	2	15	510
C15orf63 (3)	TAGATTATTGGGAATTGTGGGTAGCGGTGCAGTAACTAGACCTGCCTTTCCCATAG ........((((((..((((((...(((......)))..))))))..))))))... (-18.80)	72	25	5	1	347
C19orf54 (3)	AGCCCTCAGCACGGTGCTGGGCACATGCAGCAAGCCCCCTCTGTGTGCTCTCACCCTGCAG ........(((.((((..(((((((((.((........)).))))))))).)))).))).. (-22.40)	12	9	13	8	362
C3orf19 (8)	TTTTGGACAGGAATATTGCAAATTTGGCTTCAAGCAAATAATTTTCTGATTTTCTGTTCAG ...((((((((((......(((((..((.....))....)))))......)))))))))). (-13.50)	15	0	5	2	530
C7orf43 (2)	AGACCATTTGGAAGGAGGCCTGGGTCCTGGAAGCCGAGCTGGCATGCTGACCTGTGTCTCCCCCCAGCTAAGC .......((((..((((((.((((((..((..(((.....)))...)))))))).))))))..))))...... (-25.40)	8	7	12	131	215
C9orf93 (15)	TTTATTGGGGGAGATGACACAAAGAAATAGCTTGTGAGCATATTTCCTTCTCTGTTGCATCTCCCCGTATAG .......(((((((((..(((..(((((((((....))).))))))......)))..)))))))))...... (-24.60)	5	2	15	2	1573
CACHD1 (21)	ACCAGGAGCATGAGTTTGGAATGTGGGCGGTGGTCGTCTTAACCTCCAGACTTACCTCCTGCACAG ..((((((..((((((((((....(((((.....))))).....)))))))))).))))))..... (-26.50)	124	12	0	1	911
CACNB3 (9)	GCCTGCTGGAGTGAGCAGTGGGCAGAGCTCCTGGTGAGCACTGCTGCTGCCTCCCTCCATAG ..(((.(((((.(((((((.(((((.((((.....)))).)))))))))).)).)))))))) (-29.50)	51	44	3	3	597
CACNG8 (3)	CGGGGGCGGGGCCGGGGGTGGCCTCGAGGCTCCCGTCTGACCGTCCCCGCCCAG ...((((((((.((((((.((((....)))))))......))).)))))))).. (-34.10)	47.1	22.5	1	4	2072
CAPN1 (12)	GCCCCTGAGGGTGGGCTGAGTGGGCAGCTGCAGCCCTGCTCCCTCCTCCCTCCCACCAG ......(((((.(((..((((((((.......)))).))))..))).)))))....... (-25.40)	35	56	0	7	741
CASKIN2 (7)	ATCGGGTGAGGGGTGTCAAAGTGCTTAGCGTGTGCTCATGTGACACTGTGCACCCAG ...(((((...(((((((.(((((.......)))))....)))))))...))))).. (-23.70)	9	1	2	25	375
CELSR2 (17)	GCTCCATGGTGGGGATGTCAGGTGTGGGTTGTGAGCACACCCACCGTGACCTTGCCCACCCCAG .......((((((((.((((((((.((..((....))..)))))).)))).)).)))))).... (-26.20)	87.5	34.5	2	0	520
CEP57 (9)	AGGCTTAGGGAATAGAAAGTGGTGTAGAGAATATAACTTCAATTACTTCTTTCATCATTTTTCTTCCTTTAG ...((.((((((..((((((((((.((((((...............)))))))))))))))).)))))).)) (-17.26)	25	0	3	0	5209
CHCHD1 (1)	GTAGGAGGGCAGGAAGGTGGGTCTTCTTGTGACTGAAGGTCCCCCGGATCTGCCCCTCCAG ...((((((((((..((.((..((((........))))..)).))...))))))).))).. (-31.70)	53.83	51	3	32	123
CHD8 (8)	TGAGGTAGAGGAGTGGGTTTACTGGACAGTGATCTTTTGGTCTTATTGTTTGGTTTCCTAACTCATCTAG .....((((.(((((((...((..((((((((((....))))..))))))..))..)))).))).)))). (-24.60)	30	7	0	14	1304
CKB (3)	GGGCCGGGCGGGCGGGGCCGGGGTCTTCGGGCGCTCACTCCCGTCTCGCCTCCCAG (((..((((((((((((..((((((....))).)))..))))))).)))))))).. (-34.40)	72.16	47.17	3	19	72
CLCN7 (10)	GGGGGAGGGAGTTGGTGGTGGGCATGGTGCCCTGTGTCCAGCTGGCACCCGAGCCGGCCGCCTGCCTTCCAG ...((((((....((((((.(((..(((((((((....)))..))))))...))).))))))..)))))).. (-41.70)	23	23	2	7	317
CLPTM1 (11)	GAGCAGGGCTGCCAGGCAGGGCTGAGGAGCTGGCTGACAGCCCCACCCTGTGGCCCCACAG .....(((..(((..((((((.((.((.((((.....)))))))))))))))))))).... (-29.60)	113	87.5	1	1	292
CNOT3 (10)	TGGTGAGGGAGACCAGCTGGCCCACTGGGTCCTGACCCTCTGCTCTCTCCCACCCGCAGT .((((.((((((.(((..(((((...))).)).......))).)))))).))))...... (-21.30)	0	2	12	5	1489
CNOT3 (8)	CAGGAAGTGAGGGCCCAGAATGGGCTGTGTGAGCCAGCTAAGCATGCCCTTCTTCTGCCCCCACAG ......(((.((((..((((.(((((((...((....))..))).))))))))...)))).))).. (-26.90)	13.5	2	8	25	92
CNTROB (19)	AGTGGGGTGGGGAATTGAGAGGATCTGACGCTGATTTCTTCCTCTCTCTTCCCTCAACTCTCAG ..((((((((((((..(((((((...((........)).)))))))..))))))..)))).)). (-24.90)	27	8	0	3	227
COASY (10)	AGGGCAAGGCCGGGTTGTGGGGAAGGAGTCTCCAGTGGGTACTGCCTGACCCTGCCCTCTCTTCCTCCCAACATCCTGGCCTGTCTGAAG .((((.((((((((.(((.((((.((((........((((........))))........)))).)))).))).)))))))))))).... (-40.99)	18	27	3	1	100
COL27A1 (60)	TGAGGAAAGATGGAAGGGAAAATGCTCATGATGTATGATAAGAATCACGATGGATGTACGTGTGCACTTTTCCTTCTGCCTTCAG ....((.((..((((((((((.(((.((((((((.((((....))))......)))).)))).))).))))))))))..)))).. (-24.00)	59.33	9	5.5	0	1070
COPB2 (8)	GTGGAAGAAAGGAAATGGAGCTCTCTGTTAGGTGAAAAAAATAATCTGTTTTGTTTTGGTTTTATTCATTTTCCTTTTCATTGCTGAGAGCTATTTTTCTTTCTTTCAG .((((((((((((((...(((((((.((..((((((((.(((((......))))).(((......)))......)))))))))).)))))))..)))))))))))))). (-34.10)	109.25	15	0	4	253
CORO1A (4)	GTGGCTCGTGGCCTGCAGTGGATGAGGGCAGGAGGCTCATGGCTTCTGACACTGTGGGGAACGTGCAG ...((.(((..((..(((((...((((.((.((...)).)).))))...)))))..))..))).)).. (-29.70)	27	18	189	113	93
CPNE1 (4)	CAGCAAGGGTTGAGGAGGGACTTAACATCAATGAATTCATGAGGTGATGTAGTCTCCCCTACCTAG ......((((..(((.((((((..(((((((((....)))....)))))))))))).))))))).. (-20.90)	3	1	9	31	76
CPT1B (11)	CCTGCAGGGCAGGCTGTAGGGGATGAGGCCAGCCTCTCAGTCTCATCCTCTCCCTGCAGTTTGTC .((((((((........((((((((((((..........))))))))))))))))))))...... (-31.70)	7	5	12	3	80
CRABP2 (1)	TCTTATGGGGAGGGTGTGAGAGAGGTGCCCAAAGGCCCCTAAAAGGTGAGCCTCTCCTCTCTCCCCACAG .....(((((((((.....((((((((((....))).((.....))...)))))))..)))))))))... (-30.30)	39.25	27	2	1	4324
CREB3L1 (3)	GCTTGCAGAGGGTAAGAGGGTTCCTGCTGGACAGTCATCGCTGGCCTCTCTTCTCTCTCCAG ...((.((((((.(((((((.(((....)))((((....))))..))))))))))))).)). (-21.80)	70.5	20	3	2	181
CREB3L4 (6)	CTCACCATGGGAGGCAAGGTAAGGGACTCAGGTTGCTGAGCCTTGTCCTACCTCCCTACATTCTAG ........((((((..(((..((((.(((((....)))))))))..))).)))))).......... (-26.30)	58	27	7	2	116
CREBBP (26)	TTAAAGGCAGGGCCGATTTCACTGGCACGTTCATCTGACGTGTGTGCGTGGGTCCTGCAG ......((((((((.((..(((..(((((((.....)))))))))).)).)))))))).. (-27.40)	1	1	10	39	1743
CUX2 (20)	TGCTGGCCAGGAACTTTTGGGATGGGGACACCACCTCTCAGCCCTCCCTCTCTTCCTGGCCCCAG ....(((((((((.....((((.(((...............)))))))....))))))))).... (-27.06)	220	170	0.33	2	3305
CYLD (18)	TCACTGGCAAAAGGGTTTAGAACTTGACTGCCCTATAAAGAGTTCTTCCTCTGTGCCATAG ....(((((...(((...(((((((..............))))))).)))...)))))... (-17.14)	206	6	0	1	1895
DBN1 (6)	CCCTTTAGGTGTCGGGGGTTCCTGGGGCATTCAGCCTGCTTATGCTGGGTCCTTCGACACTGCAG .......(((((((..((..((..((((.....))))((....)).))..))..))))))).... (-27.30)	5	0	15	10	148
DHPS (5)	AGGAGAGGGGAAGGAGGGCTGGCTGAGTCCAAGGCCTGACTTCGGCGCTCTTCCCCCAG ......((((.(((((.((((...(((((........))))))))).))))).)))).. (-26.00)	1	3	10	35	79
DHX30 (17)	GCTGGGCTGGGCTGGGCTGGGGAGTGGCTCTCGAGGGTGGTACTGACAGCTGAGCCGTTGCAG .....((..((((.(((((...((((((((....))))..))))..))))).))))...)).. (-24.20)	2.5	12	190	7	73
DHX38 (3)	GTCTGGGGCCGCTGGGGACAGGCCAGGGCATGGACTGACCTGCTTCCTGTGCTCCTCCAG ..((((((..((((((((((((.(((........))).)))).)))))).))..)))))) (-26.10)	41	40	0	3	158
DOK3 (1)	GAGGGGAGGGGACAGGGCATGGGAGTGCGGTGCTCTCACCTTTGACTTGAACTCATTCCCCAG ..((((((((..((((.((.(((((.((...)).))).))..)).))))..)))..))))).. (-24.80)	1	1	9	39	3126
ECEL1 (11)	GGGCCTGGGCAGCAGCATGGGGCTCTCAGAGGGTGGAGGGCTAGGGCCTGATGCTGCTGCTGTGGGCCCAG ((((((((((((((((((.(((((((.....(((.....)))))))))).))))))))))).))))))).. (-46.60)	17	9	257.33	58.67	568
EIF2C2 (7)	GCAGCGCAGGGGAAGGGGCTCCGGGATGCCCTCGGCCTGAACAGCCCCTTTGCTCCTCAG .......(((((.((((((((((((.....))))).......)))))))...)))))... (-24.21)	1	2	29	28	1248
EIF3B (2)	GTGGGGCGGACAGCGCATACCTGCCTAGCCTTACAGTGTGGGTATGTGCCAACGGCCCTCTCTCACTCAG ..(((.((....((((((((((((((........)).))))))))))))...)).)))............ (-28.60)	64	113	1	0	1742
EIF3CL (2)	CGAAGCGGGCATGCTGGGAGAGACTTTGTGATTTGTCTCCAAAGCCTCACCCAGCTCTCTGGCCCTCTAG ...((.((((..((((((.(((.(((((.((......))))))).))).))))))......)))).)).. (-30.80)	145.64	38.29	4.5	0	770
EIF6 (5)	AGCTGGTCCCGGGATGAGGGCTGAGGCAGGCACCTCACTTGAGAGTGAGGTGGGCTCTGTGAAACAGCTACTGACCGTGCGCTTTCCTTTCTCTTCAG ..((((....((((.(((.((...(((((.(((((((((....)))))))))....(((.....)))...))).))..)).)))))))......)))) (-34.30)	31	7	0	6	359
EPHA2 (14)	AGGCTGGAGGCTGCAGAGGGTTTCAGTGGCTTTCTGCAACAGCGCCCCTGACCTTCGTGCCCCGCCAG .(((.((.(((....(((((..((((.(((...(((...))).))).)))))))))..)))))))).. (-29.20)	25.25	8	0	4	1301
EPHB3 (9)	GCCCATCGCAGGGAGAGGCTGGCTTGACGTTACCCTCTCACGCCCACCTCTTCTCCCTCCAG .........(((((((((..(((.(((..........))).))).....))))))))).... (-18.30)	6	4	13	2	1010
ESRRA (5)	TGACCCGGGGCTGCCCTGAACGGGCCCGGCTCTGGTGCGCTTGCTCAGCCAGGCCCGCTCCCCGCTGCCCCCTAG ......(((((.((...((.((((((.((((..(((......))).)))).)))))).))...)).))))).... (-37.00)	126	91	0	5	89
EWSR1 (7)	TGATTCCAGGAGAAAGTACATCAGGCAGTGGTGTAAATGCTGGTCCATGGCTTACAGATGTGACTCTTTCCTCAG .......((((((.((((((((((((.((((.((....))....)))).))))...)))))).)).))))))... (-21.10)	13	0	38	0	1471
F13A1 (13)	AAGACAACAAGAGAGCAGAACGAGGTTTTATTTGGTGCTAATGACCTGCATTCTCTCTCTTAG ........(((((((.((((..(((((....(((....))).)))))...))))))))))).. (-15.80)	21	5	1	3	15508
FAM116B (7)	CCAGCTGGCTGGGGAGTAGGCTCTGCAGGTGTGTGGGGATGCCCTACTCCCTCTGGCAGCTGCTCC .(((((.((((((((((((((((..((....))..)))....))))))))))..)))))))).... (-33.60)	22	1	2	3	86
FAM83F (3)	GGCCACAGCGGAGGGGCAGGTGGGGGCGGGGGCAGGGCAAGAGAGAGGCCTGGGCACATGTGTCTTGCTTTTCTGTCCCCACGTTCCCAG .((....))...((((...((((((((((((((((((((........((....)).....)))))))))..)))))))))))..)))).. (-41.22)	0	1	4	2	1281
FANCD2 (20)	GCGAGTGGAGTTTGGGAAAGATTGGCAGCCCAAGGTTTAAACCATTCTTCCTCTTTGCTCCAG .....((((((..(((.((((.(((.((((...))))....))).)))).)))...)))))). (-20.10)	51.2	11	0.33	12	1580
FBXL19 (9)	CTGGATACCTGGGCGCAGGGATGGGAGTGGCCAGGAGTGCTGACCTCTCATCTGGCTGCCCAGGGCAAA .......(((((((((..((((((((..((.(((.....))).)))))))))).)).)))))))..... (-33.00)	33	17	0	14	4193
FBXO17 (1)	GGACAAGGTAGGGAGGGGGTGGCCTGGCTGCGCTGACCCGCCTACCGACCCCTCTCGACCTGCAG .....((((.((((((((.(((...(((...........)))..))).)))))))).)))).... (-28.50)	1	1	35	6	2236
FGFR3 (13)	CAGCGGGGAGAGGTGGAGAGGCTTCAGCCCTGCCTCCCACCCCTTCCCCAG ....((((((.(((((.(((((.........))))))))))..)))))).. (-29.60)	7	1	18.33	7	110
FRMD8 (4)	GGCCAATCGGGAGAGGGGAGGGCTAAGCAGAGTGGGGATGCCCGGCAGTGACCCAGCCTCTCTCCCCAG ........((((((((((.(((.....((..((.(((...))).))..)).)))..))))))))))... (-30.40)	22	17	2	2	366
GATAD2A (2)	TGTCCACAGGGGTGGGCACTGGGTCCAGCTGTCAAGGGCGCTCTGGTCACTACTGTCTCCACCCCACAG ........((((((((((.(((..((((.(((.....)))..))))...))).)))..))))))).... (-26.10)	6	7	22	9	26691
GATSL1 (8)	CAGGGCCGGGGTGGGGAAGCAGGTTCCTGGGCTCACGGGCAGGCATCTGCCTCCTCTACCCCTGCACAG ....((.((((((((((.((((((.(((..(((....)))))).)))))).))).))))))).)).... (-37.10)	8.75	3.25	16.5	8	99
GCN1L1 (5)	GATGAAGCCAGGATTTGGAGGGTCTGATGGAGGTCTTTACAGGCTATGAGAGCCATGGGACCCTCAGTCTCATGTCCCACCTTGACCTGAGTCTTCCCTGGTCCTGGCAG ......((((((((..((.((((((.((((...((((..........)))).)))).))))))..((.((((.(((.......))).)))).))..))..)))))))).. (-46.70)	29	15	0	12	4618
GCN1L1 (54)	GCCTCATGGGTGCTGGGGACATGCTGTAAAATACCGGTTGATCCCAGTCGTGTCCTTCCACCCAG ......((((((..((((((((((((...(((....))).....))).))))))))).)))))). (-24.20)	23	3	3	1	592
GGA3 (7)	TAAGGTGTGACCTGGTGGAAGTGGAAAGACAGTCAAGTGACGCTCTCTTTCTCTTGAACTTCTTCACTGGGGCAG .......((.((..(((((((((((((((..(((....)))....))))))).....)))))..)))..)).)). (-22.80)	23	3	35	61	357
GPR108 (2)	GACAGGGTGGAGCTGGACCAGGAGAGGAGTAACCAAGACTCACTCCCTCCTGCCCACCCCCCAG ....((((((.((.(((...((((..((((.......)))).)))).))).))))))))..... (-28.10)	132	64.33	0	1	203
GPR135 (3)	CTCAGTAAGAATAGTGAGTCTGTGGCATTTGATTTATAACCCACTCTCTCCCTATTCCCAG ........((((((.(((...((((...............))))...))).)))))).... (-13.56)	458.58	64.5	1	0	1967
GPR56 (8)	GTGCTTTTGGGGGTGGACACAGTGGGGTCCTGGAGGACTGGACTTGATTGGAGCCCCGTGCTGTCCCCTCCTCAG ........(((((.(((((((.((((((((..(((.......)))....))).))))))).)))))))))).... (-31.30)	16.67	17.67	6	3	242
GRAMD1A (2)	TTGTGGGGCAGCATTGGGAGTGTGAACCCCCATCCAGGTTCTCACCTCTCAAACTTCCTCAG ...(((((.((..(((((((((.(((((........))))).))).)))))).)).))))). (-23.70)	5	0	11	63	558
GRAMD1B (11)	TCACTTGGAGGGGAAACTTGGATTGGGGAGAGGGCTCTGCCCTCCCTTCCTCATTCCAGGGCTCTCCTCTACCCTTAG .....(((((((((..((((((.((((((((((((...))))))...)))))).))))))..)))))))))....... (-42.90)	49	37	1	1	992
GRIA2 (13)	GTGGGTGGAATAGTATAACAATATGCTAAATGTTGTTATAGTATCCCACCTACCCTGAT ((((((((.(((.(((((((((((.....))))))))))).))).))))))))...... (-27.80)	15	2.5	6	2	565
GUK1 (7)	GGTCGTGTGGGACCTGGGGTGGGGCTGCATGGGCTCACTGTGCCCTGACCCCAGGCCCCACCCACAG ((..(((.(((.((((((((.(((..((((((.....))))))))).)))))))))))))))).... (-40.30)	16	13	2	1	671
H2AFY (2)	AATGTGGGGACCGGGGCGGGGACACATGGTCCTCTAACATGACCATACACTCATCTCTGCTCCCCACAG ..((((((((.(((((..(((....((((((.........))))))...)))..))))).)))))))). (-29.80)	5.5	14	35	28	18779
HAUS5 (7)	TGGTCATGGGAGAAGGGGCAGGGAGCCTGGAGTCAGGCAGATGCTAGGGTCCCCCTCAGGTCCCTTCCTCCTCTTCTCCCTAG .......(((((((((((.((((.(((((....))))).......((((.((......)).)))))))))))))))))))... (-42.00)	9.5	7	2	21	93
HERC2 (7)	TGTAAGCATGCTGTCTTTCTGGAGGTTGCTTTGTTCCTGCATCCACTGCTTTCATTTCAG ((.(((((.....(((....)))((.(((.........))).))..))))).))...... (-9.70)	215.5	414.5	3	1	1286
HMOX2 (2)	TCTGGAAAGCTGGGAAGGGCTAATTGACACACAAACACCTCCCATCTCTCCACAG ..((((.((.((((.(((.....(((.....)))...))))))).)).))))... (-15.50)	0	0	223.53	145.33	1284
HPD (8)	CATGGAGAAGGGAGCAATCTGGGGGGTAGCCACCTTCTCACCCCCATCTTCTTCCCTTCCCAG ..(((.((((((((.((..((((((..((.......))..))))))..)).))))))))))). (-28.70)	0	0	356.83	72	610
HSF1 (5)	GGGCCAGAGGGCCGGCGGGGGCCCCACAAGGGCCGGGGTAACTGTGTCCTCTCTCTCCACAG (((..(((((((..((((..(((((.........)))))..)))))))))))...))).... (-27.80)	7	1	8	9	71
HSPA8 (7)	AGACTGCTGAGAAGGAAGAATTTGAACATCAACAGAAAGAGCTGGAGAAAGTTTGCAAC ...(((.(((...(((....))).....))).)))...(((((......)))))..... (-6.20)	89	8	145	17.33	938
HSPG2 (35)	GATTTGGGGGGTGGTAACTGTAGGAGCAGCCCACAAAGCCCACTGCCCCCGCCCACGTTGCCACCCCCAACCCAG ......((((((((((((.((.((.((((.............)))).)).))....))))))))))))....... (-32.12)	165	52	2	0	211
HTT (58)	CCACCCACCAGGAGCCTGGCACTGTGGCCGCAGCACTGAGCAGTGCCCCGTTTCTGTGGCAG ....(((.(((((((..((((((((.((....)).....))))))))..))))))))))... (-27.10)	95	72	1	1	2871
IARS (26)	ACATTTTGCTGAGTTGGGAAGAAGTGTTTCTCCTTATTTGATTGTCATGGTGTGCACTGTTCATTCCCACAG ........(((...((((((..(((((....((.....((.....)).))...))))).....))))))))) (-15.30)	1	0	0	49	1647
IMP4 (5)	GGGAGTCGGGGTGGGAGCCGTCTGAGGGCAGACGGGGTCTCTGACAGCCACCTTTCCCCGCCAG (((((...((((((...(((((((....))))))).(((...)))..)))))))))))...... (-28.40)	20	10	38	50	79
INPP4A (20)	TCTGCTGAGACTGGGGAGAGTAGCAGGGCCCTCTGCCTGACAGCCCTGCCCCTCTCTCATGTCCAG ....(((.(((..(((((((..(((((((..((.....))..)))))))..)))))))..)))))) (-34.60)	85.5	48	0	1	876
IQSEC3 (12)	GTAAGTGGAGCCCTGGTTGCCCAGGTGAGTGACTACCCTGCCCCCTTGTTCTTCTTCTCACCGTCTCTGTTGTTTCTCTTCTCAG ..(((.(((((..(((..((...((((((.((..((...........))...))..))))))))..)))..))))).)))..... (-14.20)	0	0	0	2	85
IRAK1 (1)	CGGGCTGCCGGGGGGCGGGAGGCGCGCGGGCTCCTGGCGCCGACGCCTGACGCCCCCCGCCCCGCAG ((((..((.((((((((..(((((..(((((.....)).))).)))))..))))))))))))))... (-45.80)	9	28	2	22	78
IRAK1 (3)	CAGCTGTGGTGGGGAGAGCCTGGAGCCTTGGGCAGAAGGGAAGAGACAGGGACCCCACCTGATCCAGGCTCTCTTCCCACAG ...((((((.((((((((((((((.((((......)))).......((((.......)))).)))))))))))))))))))) (-45.40)	2	2	21	62	187
KDM6B (13)	GGAAGGGAAAGGGTCGATTGGGTCCTCGGTCCCTATCCTCTGCCTCTGCCCCGACACCCTGCTCGGCCCTCCCTTCCAG ((((((((..(((((((..((((..((((.....................)))).))))...))))))))))))))).. (-35.80)	24	16	9	4	843
KIF21B (16)	CTGTACACAGACAGAGAGGGCTAAGGTGCCTGAGTGTGGAGCCCAGCCCTCTTCTGTCTCCCACAG ((((....((((((((((((((..(((.((.......)).))).)))))))).))))))...)))) (-31.50)	47	41	3	2	556
KRT8 (5)	GAGGGAGGGTGGGAGCACGGGAGAAGAGAAGGCATACCCAACCTGACCTACTTACCTGTCCCCTACCCCACAG ......(((((((...(((((....(((.(((((.........)).))).))).)))))..)))))))..... (-21.50)	1.5	0	54	39	875
LDLR (3)	TATAGAATGGGCTGGTGTTGGGAGACTTCACACGGTGATGGTGGTCTCGGCCCATCCATCCCTGCAG ........(((.(((...((((.((..((((.((....))))))..))..)))).))).)))..... (-21.40)	29	5	8	0	2433
LLGL1 (10)	CATACTCGGGGTGAGAGGGAGAAGATGTTCGTCCTAACCTTGTGCATACATCTCTGCCACCCCCTCCCAG .......((((((..(((((....((((.((.........)).))))...)))))..))))))....... (-21.00)	25	3	6	2	157
LONP1 (10)	CCTGGAGGGTGCATGGTGTCGTTGTGGCCGAGCCAGGCTACCAAGTGACCTCTGACCCCGCTGTGCACCCACAG .(((..((((((((((((..(((((((((......))))))............)))..)))))))))))).))) (-33.60)	11	20	9	1	2269
LRP5 (6)	CTTGGCACTGGGGATGCTGCAGAGACCAGACAGACTCATGGGGTCATGGACTTCTGCTTCTTCTCCAG .......(((((((....((((((.(((....((((.....)))).)))..))))))....))))))) (-25.30)	89	44	3.5	10	3168
LRRC45 (2)	GGGGCATGGGCGGGAATTCAGAGCCAGTCAGGGCACGCGAGTGACTACCGGCCTGTTTCTCTCCTAG ......((((.(((((..(((.(((.((.((..(((....))).)))).)))))).))))).)))). (-26.70)	7	2	21	4	353
MADD (3)	GGTGATACTGAGTTGCAGTAGGGTATCAGCTTCTGATGCTAATGTGTCTGATTCCTGCTGTCTGCTTCTCAG .......(((((..(((((((((.((((......(((((....))))))))))))))))))......))))) (-22.60)	45	9	1.5	4	739
MAP3K6 (28)	GACAGAGGGGGCACTGGGCAGACAGTGTGTGCAAGATAGAGTCCAGGGCCACCTTCTGGCTGAGCCACACTGAGTCCATTACCCCCAG ......(((((...(((((...(((((((.((.((.((((....(((....))))))).))..))))))))).)))))...))))).. (-37.10)	17	5	6	17	199
MAP4K2 (3)	GTGAGGGGCGGTGGGGGGAGGCCCAGGGCACCCTCAGAGCTCTGGGGGGAGAAATGGAGACCTGAGCATCCCTGCTGCCCCCTAG ....(((((((..((((...((.((((...(((((((....)))))))............)))).)).))))..))))))).... (-46.86)	0	3	105	102	85
MARK3 (15)	CTAGCTGAAGTGTAAGAGGTTGATTTTCCTGTACGATTAAAAATAAACCTGCCTCTATGCATTTCAG ....((((((((((((((((..(((((............)))))......)))))).)))))))))) (-18.20)	15	1	3	4	10847
MCOLN1 (13)	GTTAGGGAATGGGGAAAGGGGAGCGAGCCAGAGAAAACTGACGCCCCTCTTCCCTGCTTCCTTCCTCCAG ...(((((..((((((..(((.(((...(((......))).))))))..))))))..)))))........ (-28.80)	36	48	0	8	105
MED12 (43)	AAAAAACGGATTGGGAAAGGAGGTTGAAGAAGGAGAAAAGTTCGACTTCAGTCTTCCACTTCCTATTTCCACCCAG .......((..(((((((((((((.(((((..(((...........)))..))))).))))))).)))))).)).. (-25.00)	140	37	6	0	512
MGAT5B (7)	TGCCCCGGGGGGGCGGGGCTCAGAGCTGCTGCTCCTCTCTGCTGACCCTCTGTGTTCCGCCCACCCAG ......(((.(((((((((.(((((.....((........)).....))))).))))))))).))).. (-35.40)	3	5	7	19	684
MLL4 (28)	GCATGTGGGGGTTGGGGGTGGAGCCGCGGAGGTGGGAGCTGCTGGTAACACCAACCCTCCCCCCACAG ...((((((((..(((((((..(((((((.........)))).)))..))))..)))..)))))))). (-37.60)	3	7	4	14	79
MLLT6 (1)	GGCTGAGCAGGAGTCTGGGGTGGAGAGTAACCACGTGCTTCCCTCTGTCCTTGTGCCTGCAG ......(((((.....((((..(((((((......))))...)))..))))....))))).. (-22.30)	16	6	0	3	1603
MLXIPL (5)	GGTGATATGGAAGATCGGGGCAGTGGGAGCTCTCTAGCGGCTGCTGACGGCTCTGTCTCCCTAG ........((.(((.((((((.((.((((((.......)))).)).)).))))))))).))... (-21.50)	19	6	2	4	862
MPP3 (3)	GGACCCAGCAGATATGGGGCAGGGGCACCTCTAGCCATCAGTGGCGCCTGTCTCATTCTCTGCAG .......(((((.((((((((((.((..((.........))..)).))))))))))..))))).. (-27.70)	1	2	20	64	1136
MPRIP (16)	CCCCTGTCAGCAGGAAGGGCGTGGTCCCTCGGTGCTGAGGCCGTGTCCTTGCCTGCAG .........(((((((((((((((..(((((....))))))))))))))).))))).. (-28.40)	29	14	1	2	832
MTSS1 (1)	AGAGCGATGAAGGGAATCACTCATGATAATAACATTTCATGAATGACTTTTCCTTCAG .......((((((((((((.((((((..........)))))).)))..))))))))). (-18.80)	50	7	15.5	7	1200
MYO3B (23)	TTTGGAAGACATGGAGCATGAGGTAAGTGCCTAGATCCTCAAACCACTTGCCTCCACCTATGCTTCCAG ..((((((.(((((.....((((((((((....((...))....))))))))))...))))))))))). (-26.40)	0	0	169	29	19321
N4BP3 (2)	CATCAGGAGGTAGAGCAGGCAGCTGCCCAGGTCTCACACCTGCCCTCTCTGCCCTCTCTTCCTGGCAG ..((((((((.((((..(((((.....(((((.....)))))......)))))))))))))))))... (-28.80)	120	61	1	0	264
NBEAL2 (18)	TCTGCTGGGGTGGAGTAGGGCAGGAAACTGGCTGGAAGGTCCCCCTCACTGCCATCCTCCTTCCCCCAG ....((((((.((((...(((((((....((((....))))....)).)))))...))))...)))))) (-30.30)	26	22	0	4	212
NCKIPSD (5)	TCCCTGGAGATGGTGAGGGCAGGGAGTGTGCTGAGTCATGCCTTGCCCTCTCCCTCTAG ...((((((..((.((((((((((.(((........))).)))))))))).)))))))) (-31.70)	8.5	14	4	25	1057
NFE2L1 (4)	ATCTCTGGGAGGAAAGCACAAGGTTTTTCCTTCCCCCTTGTTAAAGCCTCTGTGTTTTGCCCTAG ....(((((...(((((((((((((((...............))))))).))))))))..))))) (-18.16)	29.5	5.5	6	0	222
NFKB2 (15)	GTGGGAGGGGTTGGAAGGCAAGTGGGTCTCGGGCCTGGCTCACCCTGCTTTCATCCCCAG ......((((...(((((((.(((((((........)))))))..)))))))..)))).. (-28.60)	24	28	0	2	83
NOC4L (11)	AGGGGAGGGTGGTGGGGGCTAGCAGTCCGGGCCCTGTCTCACAACCACTGCCCTGCCCAG .(((.((((..(((((((((.........)))))..........))))..)))).))).. (-31.60)	1	1	4	29	115
NOLC1 (2)	CCCCCAAGATAGGCTGGGCTGTGTTTCTTGGTTTGGGAAGATTCCAGTCCCCTAGAAATTGGTCCAATCTACCTCAGCAG ......((.(((..(((((((.((((((.((.((((((...))))))...)).)))))))))))))..))).))...... (-22.80)	123	19	1	1	114
NTAN1 (2)	GTAGGTTAGGAAGCAGTGAATTGGGCGTTATCCCAAAAGGCTATTGGATATTTTATTTTATTTCTTTTTTAAACAG ....(((((((((.((((((.((((...(((((............))))).)))).)))))).))))))..))).. (-10.10)	0	0	0	0	76
NUBP1 (4)	TGAAATGTGACCAGGGTACATGATTTCTACTAATGAACATCGGTGCTCATGTTCACACAG .....(((((.((((((((.(((((((.......))).)))))))))).)).)))))... (-17.40)	16	0	3	11	3042
OTUD7B (2)	CTGTTTCAGAAATAGGAAGGTGGAAGGGCTTCATGGATAATCTCCTTTTCCTCCACTATCTTGTTTCTACAG ((((...((((((((((.(((((.((((......(((.....)))...))))))))).)))))))))))))) (-26.00)	273.5	105	0	1	1415
PANK4 (12)	GTGTCCAGGGTGGGCTGAGGCCACGTCTTCACTCAGGCCTGGCATCTGGCACTCTCCACAG (((.(((((....(((.(((((.............)))))))).))))))))......... (-21.82)	14	0	11	3	962
PARP3 (5)	GTGAGGGGTGAGAGGCAGGCAGGGTGGCAGGGGCCTCAGGGTGGCAGGGCTGTGGGGCTGA ..................((......))...(((((((.(((......))).))))))).. (-16.10)	0	1	95.33	85	87
PAX5 (6)	AGAAGTGGAGGAGACTGGTGGAAAGGGGACCCCGGATCTGACCTCGGTGCTCTCTCCCGTCTCTTCCAG .....((((((((((....(((.((((.(((..((......))..))).)))).))).)))))))))). (-30.50)	100	41	1	1	6206
PHGDH (4)	TTTTTTCTGGAGGTGGAAGGAAAGGATTGGGAGCCAGCAATACTTTCCCTCCTTTTCCAGGACCAGC ....(((((((((.(((.((((((.((((........)))).)))))).))).)))))))))..... (-25.90)	68	13	0	2	315
PIEZO1 (6)	ATGACTGTGGAGACAGCGGGACACATGGCACTGGCCAGGTACCACCCTGTGTGCCCCTGCCCCGCAG ....((((((...(((.((((((((.(((....))).((.....)).))))).))))))..)))))) (-27.20)	101	57	2	3	127
PIGQ (2)	GGGGGACGGTGGGAGGAGGATCTGGAGAGGGACACATCACTCCTCTCCACTCCCACGCAG ..((((..(((((((((((((.((........)).))).)))))).))))))))...... (-27.00)	34	8	7	1	1075
PIGS (2)	TTAGGTCTGGGAAGGTGGGCAGAGGCATGATGCTTGCCCTTTTCATTGTGCTACTTCTTATCCCTCCCAG ......((((((.((((((.((.((((..(((...........)))..)))).)).)))).)).)))))) (-24.60)	0	0	0	0	6944
PIK3CD (11)	GGGCATGGAGCCGGCGTGGAACCAGAGCCCTCACTCCTGCCCACACCCCTCAGCAG (((((.((((..(((.((....))..)))....))))))))).............. (-21.40)	1	4	7	17	83
PIM3 (3)	GGGCGGCGGCGGCGGCGGGGGGCGGGCGCGGGGCTTTTGCTGACCGCCGTGTCCCCCAG .((.((.(((.(((((((..(((((((.....)))..))))..)))))))))))))).. (-31.30)	13.44	386.35	6	54	73
PKD1 (12)	GAGGGAGGGACGCCAATCAGGGCCAGGCCTCTCACCTGCCACCTGGGCTCACTGACGCCTGTCCCTGCAGCTGACG ...........((....(((((.(((((.((......(((.....))).....)).))))).)))))..))..... (-25.30)	3	2	4	75	197
PKD1 (8)	AAGTTCGGGTAGGGGGAGTCTGGGCTTCAGGCTGGGATGGGGTCTGTGGAGCTGAGGCGGCCCCCTGCCCACCAG ......((((((((((.((((.(((((((((((.......))))))..))))).))))..))))))))))..... (-43.80)	82	54	3	5.5	410
PKD1P1 (2)	TATCCTGAGAAGGCACAGCTTGCACGTGACCTCCTGGGCCTGGCGGCTGTGTCTTCACAG ....(((.(((((((((((.(((.((...((....))...)))))))))))))))).))) (-27.50)	25.14	5.86	17.33	15.33	124
PLOD3 (6)	GGCTGGGAGCGAGGGGGGCACAGATCTGATGTGCCCCCCACCCTCTCACAG ...((((((...((((((((((.......))))))))))...))))))... (-29.80)	5	4	1	33	169
PNPLA7 (18)	GCTGTCAGGGACAGGTCCAGCTGGCTCGGCCCTCCCAAGCCCGCGGCCCCAGCAGCCGGCTCCTGTCCTCAG .(((...((((((((...((((((((.((((.............)))).....))))))))))))))))))) (-31.72)	2	1	22	15	2040
POLR3E (15)	GCTGCTGGAGGGGAGGGGGCTGGCTGTGCCTCACGCTGGGCCCCCTCCCCTCCAG ....((((((((((((((((((((.(((...)))))))).))))))))))))))) (-43.90)	33.83	10	0	24	89
PPP1R12C (17)	GGGGCGGGGTGGGAGAGGTGGGGTCTGCGTGCGGGCCGGGCCGGCCCCTGACGCGCGCTCCTCCCCTGCCCCAG (((((((((..((((..........((((((.((((((...))))))....))))))))))..))))))))).. (-46.90)	0.5	3	5	30	77
PPP5C (10)	GGGTGTGGGCTGTGGCAGCAGGTGGAGGCAGACAGTCACCCTGAACCCCTGTCTCTCCCTTCTGCCCACCCTCAG ...((.(((.((.(((((.(((..(((((((....((.....))....)))))))..))).)))))))))).)). (-35.70)	47	51	3	7	104
PRDM15 (13)	CCCAGAGGAGCCTGATGGAGAGGCTCCTTCCCGTCACGAGACGCCGCAGCCCCTCACCATGCGGCTCCTCTGCCACAG ..((((((((((..((((.((((........((((....))))........)))).))))..))))))))))...... (-35.69)	17	9	6	7	2510
PRPF40B (11)	GAGGGACAAGGTGCTGGAGTGGGGCTCCCAGGGAAGGTTTGGAGGGGGCTGGAGCGGG ..((.((...)).))...((..(((((((..............)))))))...))... (-12.24)	0	15	0	1	82
RAD23A (7)	CAAGGGCTGTGATGACCTGGGGAGAGGAGGGGACCAGGGCTGTGAATTACCTTCCCTTCCCCACCCTCTCCTGCAG ................(((((((((((.(((((..((((..(((...)))...)))))))))..)))))))).))) (-29.60)	5	1	60.5	226	3280
RAD9A (3)	GCCTGCATGGGACAGGAGAGCTTGTTGCAGAGATGTGATGCTAGGCTGAGGTGTCTTATCCCATGCAG ..((((((((((.((((..((((...((..((........))..))..)))).)))).)))))))))) (-27.40)	17	1	20	14	713
RARA (5)	GGGGCTGGAGCCAGGCTGAGAAGGGGTGCCATGGAGAAGAAGGCCCTCACTCTCCCTCCTCCCCCAG ((((..((((...((..(((..((((.(((...........))))))).))).))))))..)))).. (-27.90)	100	79.5	7	14	260
RCC1 (9)	TCGGGGCAGAGAGAAGCCATGTGTGTCTGTCTGTCACTGACCGTGGCTTTCCCTTTGCCTGCAG ...((((((((.(((((((((...(((.((.....)).))))))))))))..)))))))).... (-26.60)	36	6	0	8	490
RCN1 (2)	GAGCATGCAGGATGAGTGATCTGGCAGGAAACGCCTTTCTTGACCGCACGGTTTAAAAACATTTCTGCATACATACATCCTGCAG .....(((((((((.(((.....(((((((...........((((....))))........)))))))...))).))))))))). (-28.51)	10	6	5	3	1012
RFX1 (18)	AGAGGGGGTCGGGCCGGACGGGGCCTGACGGTCTCCTCTCCGTCTCCATCCCCAG ...((((((.(((.((((.((((((....))))))...)))).))).)))))).. (-28.20)	8	5	1	21	262
RMND5B (9)	GGTACTGGGGAGGACAGCCATGACAGGAAGTGGAACTCACCCGCTTCGCTGCCCTTCCCAGATTGAGA ....(((((((((.((((........(((((((.......))))))))))).)))))))))....... (-31.30)	88	19.5	1	8	93
RNF114 (3)	AAGTTTAATGGAAAGGTACTCACAGAAAAGTTTTCTTTTTTCCTGTGTTTCACCTTCCAG ........(((.(((((...((((((((((......)))))).))))....)))))))). (-16.50)	45	1	0	5	647
RNF207 (4)	GGTGGGGGATGGAACTGCCCGGCCCTGCTCCTGGCCCCCTGGAAACCAGGCAGCCCCCCTCCCCCAG ..(((((((.((..(((((.((((........))))...(((...))))))))...)).))))))). (-30.50)	0	1	144	32	252
SAMD4B (7)	GGAGGCTGGAACATGGCAGAGGGCATACTAGGGGTTAACCTCCTGCCCTTTCTCATGTCCCCCCAG ((.((..((.((((((.((((((((.....((((....)))).)))))))).)))))))))))).. (-28.80)	238.25	135.5	0	1	679
SBNO2 (3)	AGCCCAGTGCCCGCGGCCGCTCAGGCCTGCAGTCTCCGCTGAGCTCCCGCCACGCACGCAG .((...((((..((((..((((((..............))))))..))))...)))))).. (-22.04)	1	2	62	43	302
SETD1B (5)	AGTCTTGCAGAGGGGACTCCGAGAGCCCCTTGGCCTTCCAGACTCACCTCACTGTCTCTCCCTGCTCTCTCTGCAG .....((((((((((.....(((.(((....))))))..((((..........))))........)))))))))). (-22.40)	21	20	0	2	3270
SF3A2 (6)	GTGAGATCAGGGACTTGGGCGTGGGGGGCGGCCAAAGGCACCCAAGAGGCGGCTCTGCCACCCGGCCGTGTCCCTGCAG .......(((((((...(((.((((.(((((.....(((..((....))..)))))))).)))))))..)))))))... (-37.90)	91	54	4	13	79
SFSWAP (8)	CGAGCAGCCAGGACTGAGCTTGGCGAGCCCCTGAAGCCCAGGGGTCTCACAGACTCTTCTCCTGCAG ......((.((((..(((..((..(((((((((.....)))))).))).))..)))...)))))).. (-28.80)	4	8	27	11	1004
SFXN3 (9)	GGTGAAATGGGGTGACAGTGAGGCAGGGGACACAAGCCGTTCCATTGTCTTTCTGTCTCTCCACAG .......(((((.(((((.((((((((((((.......))))).))))))).))))).)))))... (-29.60)	9.3	6	9.25	16	1211
SGTA (6)	GGGCCTCCTGGAGCTGGGCAGATGGGAACAGTCCATCCCCGGTGCTCTCCTCCAGCCTGGCG ..(((..((((((..(((((...((((........))))...)))))..))))))...))). (-28.60)	276.2	397	0	5	1008
SLC25A11 (2)	CAGGATGGAGGGTAGACTGTGGGTTGGCAGCTCTAGACCTTGGCCTGATATGCTGACCCCTCTGCTCCTCAG .......(((((((((....((((..(((..((.((........))))..)))..)))).))))).)))).. (-27.30)	16	18	3	7	84
SLC25A6 (2)	CTGGGATGTTTCTGGGTGGTTGGCCCTGGGTCTGGTCTGAACACCCTCTGCGTCCCCCAG ..(((((((....(((((...((((........))))....)))))...))))))).... (-25.60)	54.5	51	3.5	8	355	Chr X
SLC25A6 (2)	CTGGGATGTTTCTGGGTGGTTGGCCCTGGGTCTGGTCTGAACACCCTCTGCGTCCCCCAG ..(((((((....(((((...((((........))))....)))))...))))))).... (-25.60)	54.5	51	3.5	8	355	Chr Y
SLC35C2 (6)	ACAGGCAGGGCGGAGGCAGGGCAGGGCCGGACCAGACCTGATGGTGCCTGTCCCCCGCCCTGCAG ....(((((((((.((((((...((......))..(((....))).)))).)).))))))))).. (-36.50)	2	3	3	21	107
SLC9A3R1 (1)	GCAGAGGACAGGGAAGGCAGAACCTGGGGCACTGTGGAATAGCCATGGACCCTCCCCTGTCCCTGCAG ((((.((((((((.(((.....))).(((..((((((.....)))))).)))..)))))))))))).. (-35.40)	9.5	5	5	12	12724
SMG9 (10)	AGGTCTTTGGGGTGAGAAAGGGGAGTCCATGAAGCCAAGCGATGTCTGCCTGACAGGGCCCGTCTCTTCCCACCCTCAG .......(((((((.((((((((.((((.....((...))..((((.....)))))))))).))).))).))))).)). (-24.70)	20.75	25	2	0	655
SMG9 (9)	CAGGCTGTGGGACCTGGGGTGCAAGTGCAAGAGCAACAGCCACTCACCCCAAACCCCAAG .......((((...(((((((..((((.....((....)))))))))))))...)))).. (-21.20)	30	4	8	6	3101
SMOC1 (3)	ATGCTTTGAAAGGGGTTGGAGATGAGTCTTGATATTGTGACCGAGACTTATGGTTT ..(((((....))))).....((((((((((..........))))))))))..... (-13.10)	172.5	8	2	0	22182
SPAG7 (6)	GATGCGGCAGGAGGGCAGTGGAGGCTGAGGTACGGATTTCTAGGCCCGCCCTACCCTCCTCTCTGCC .....((((((((((..((((.(((...(((..((....))..))).)))))))..))))).))))) (-29.90)	3	7	0	13	116
SPTAN1 (10)	CTGCCTCGGAGGCATTGGGGCTGACCTCATCTCCCTGACCATGTCTCCTATGCCCCCAAG .......((.(((((.(((((.....(((......)))....))).)).))))).))... (-17.10)	84	62	1	10	1183
ST3GAL4 (8)	ACCACTGGGTTGGATTTGAGAAACAGGGCTTCACCCGCTTCTGTCTCTCTCTTCTGACCCCATCCTCCTAG ......((((..((...((((.(((((((.......))).)))).))))...))..))))........... (-24.50)	100	14	7	0	771
STAB1 (64)	AAGGGTGTGGGCAGAGCAGAGCCTGCATTGGCCATCTCCATCTGGCCCAGGCCAACAGGCCTTGCTCTGCTCACAG .....(((((((((((((..(((((..((((((....((....))....)))))))))))..))))))))))))). (-45.40)	13.5	6	94	29	85
STAC3 (6)	TAGGGCTAGGGTGGAGTGTGGGTTGAGTCCAGAACCCGACATTGAGAGATGGACTCTCCCTACTATCTTCCCTAG .....((((((.(((..(((((..(((((((.....((....)).....)))))))..)))))..))).)))))) (-30.90)	23	13	0	10	89
TBC1D24 (6)	GCAGGTGAGGTGCCTGGGTCAGTGCTGATAGGGCAGTCAGGCCGCCACTGACCTGAGCATCCTGCAG (((((....((((..((((((((((((((......))))).....)))))))))..))))))))).. (-32.60)	6	5	196	597	313
TCEB2 (1)	CTGGGCCGCGCGGGGGGCCCGGGCTTCGTGCTCACGCCGGCCCGCCGCCCCCAG (((((....((((.(((((.((((.....)))).....))))).)))).))))) (-31.00)	370.7	136.7	5	2	109
TCL1A (2)	GGAGTGAGGAATGGAGGGAGTGGAGGGCTCTGGCCGATCAATGCCTTCTCTCTCTCTCTGCCTCTCAG .....((((...((((((((.(((((((..(((....)))..)))))))))))))))...)))).... (-30.80)	58	84	0	2	417
THOC5 (2)	GGAGAGGGAAGGGGAGATTGCTATGACTGATGCTCATCAGCTTGGCACTTTCCTTTGTCCAG .....((..((((((((.(((((...(((((....)))))..))))).))))))))..)).. (-23.80)	31	6	2	1	96
THRA (6)	CTCAGTGAGAGGCTGAAAGGGGTCTGCGGCCCCAGCTGACCCCCGTCTTTCTCTCTAG ......((((((..((..((((((.((.......)).))))))..))..))))))... (-26.30)	11.03	5	10	21	1891
TIMM10 (2)	AATATAGCAGGGCTGGAATGGTCAAGGTTCCTGGGATGTCACAGGATGCTGCTGACATGACCTTGCCCCTCCCTCCCTCCAG ........((((..(((..((.(((((((......(((((((((....))).)))))))))))))))..)))..)))).... (-28.90)	79	14	0	3	1200
TMEM183B (6)	CTTTGGTGGACTCTTAGAGCCATATAATGTTTCTTCTAAGCCATTGGATTAATTCTCAGTTCTCTTCAGTCCCCTAG ....((.(((((...((((.........(((...(((((....)))))..)))........))))..)))))))... (-15.93)	0	4	321	10	2239
TNFRSF1A (8)	GCGGGATGCGGGGCGGGGCCTGGGGTTGCCGCCCGAGGCTCACCGGCCCGCGTCCCCGCAG ((((((((((((.((((((((.((((....)))).)))))..))).)))))))))).)).. (-47.90)	2	2	25	71	155
TOMM40 (1)	TGCGGATTTGCTGGGGCTGAGTCGGGGGCGCGCGGGCCCTGACCTCTGCCCTCTGACCTCTCCCCTAGCAGGCGA .((....(((((((((..((((((((((.(((.(((......))).))))))))))).))..))))))))))).. (-38.00)	10	4	9	7	92
TRAF4 (2)	CATCCCTGGACTCAAGAGGGGCAAAGAGCCCAAGAGAGGCTATTACAGGCTCCAAGGTAGAGCCAGCCCAGTTGGGTCTAGGGGTGGGAACTGGG (((((((((((((((...((((....((((.......))))......(((((.......))))).))))..)))))))))))))))......... (-47.20)	0	7	33	45	578
TRAF4 (5)	AACTGTGGGTTGCAGGGTAGGTGACAGGTAGTCAGGATATTGACTCCTGCCTCTCTACTTCTGTGGCCCCAG ..(((.((((..(((((((((.((((((.((((((....))))))))))..)))))))).)))..))))))) (-36.50)	66	15	12	10	87
TRAF7 (7)	CCACCCGGGTGAGGGAGCGTGTGCCAGGCAGGCCGTGAGGGTCAGCACGCCCTCCTCTCCCAG ......(((.((.((((.((((((..(((...((....))))).)))))).)))))).))).. (-30.10)	6	5	13	34	585
TRMT1 (7)	GAGGAGTTGGGGTGTCGTGGTCACGCTGGGAACTCGTGGCCACTGGTACCCCCCACAG ..((....(((((((((((((((((.........))))))))).)))))))))).... (-25.90)	33	8	2	1	156
U2AF2 (10)	ATGTGAGGGGCCTAGGCTTGAGCAGAGGGAGACTGGGTCTGGGCCCCCTGTGACGCCGCTGCCTCCCCTGGCCCCACAG ...((.((((((.(((...((((((.((....))(((((.((....))...))).)).)))).)).))))))))).)). (-34.40)	76	26	1	0	274
UBA7 (21)	GGGATGGGGGTTGGGGGGAGGTAAGAAGTCTCTGACTCCTCCTCTACCTCATCCCAG (((((((((...((((((((...(((....)))..))))))))...))))))))).. (-34.60)	0	4	39.5	48.5	1570
UBR5 (23)	TTAAGGCCAGTTAAGAGAACATGTTAGGAATATGTTGCCTATAATGATATACATCCTACTGTTCTGTTTACTGAAAG .......((((.((.((((((.((.((((.((((((.........))))))..)))))))))))).)).)))).... (-19.60)	20	2	16	1	452
ULK1 (6)	CAGGCGGGCCCGGCGGGGAGGGGCTCCGGGGCCGGCGCCGGTCCTGACGCTTCTCTCCCGCAG ..((....))..((((((((..((..((((((((....))))))))..))..))).))))).. (-39.40)	0	18	39	56	80
USF2 (3)	CAATGAGGGGACGGGATGGAGGAACAGAGAAAGCTAAGGGTAGCCTCTGCCCTCCTACTCCCCAG ......(((((......(((((..(((((...((((....))))))))).)))))...))))).. (-26.10)	83	5	8	15	747
VARS2 (11)	ATACATCTGGAAAAGCAAAAGCCAAGGTCAGGTTCAGTACTCACCATGGCTGTGCTCCCCAAG .......(((...((((..(((((.(((.((........)).))).))))).))))..))).. (-19.70)	15	0	3	1	240
VASP (12)	CCTGTTTTGGAAGGGAGGAGGCAGAGACTCTGCCCCTGACCTCTGCTCCTTGTTTCCTTCCAGCCTTCG ......(((((((((((((.((((((..((.......)).)))))))))))....))))))))...... (-25.80)	48	35	0	3	136
WASH3P (6)	GTGGGAGAGGAACATGGGCTCAGGACAGCGGGTGTCAGCTTGCCTGACCCCCATGTCGCCTCTGTAG .....(((((.(((((((.(((((..(((........)))..)))))..)))))))..))))).... (-29.20)	44.16	37	2.04	3.5	239
WRNIP1 (5)	GTCGCCTGCACATAGGCCAGGAGGACAGTGTGTGTCATGACTGAAACTCTCCTTTGTCTCTGTGTGTGGCAG ...(((.(((((((((...((((((.(((....((....))....))).))))))...)))))))))))).. (-27.70)	5	0	74	11	762
ZNF107 (1)	TGTAGTCTGGATTGAAGAGACGACCCAAGCAGGCTTTGTGTGAGCAGTGAGGCTATTTATTCACTTGGGTGCGAGCTCACACGAAGCCTGCTTGGGTTTTCTCTTCAATCCAG ......((((((((((((((.((((((((((((((((((((((((((((((........)))))).........)))))))))))))))))))))))).)))))))))))))) (-75.80)	711	270	6	8	12891
ZNF598 (10)	ACAGGTGGGTGCCGGGAGGGCAGGTATGGAGCCACGGGGCCTGATAGCTGTTGACCAGCTGTGCTTCCCTGCACCCAG .....(((((((.((((((.(((((.((......))..)))))(((((((.....))))))).)))))).))))))). (-39.10)	1	7	6	91	134
ZNF629 (1)	GAGGTTCAGGGGGAATAAAGCAAAGTGCAAAATCAGCTCCCAGTGTGCGCTCATCGCTGTCTTCCCCCGCAG ........(((((((...(((..((((((......((.....)).))))))....)))...))))))).... (-24.10)	32	10	17	1	2512
ZYX (2)	CTGCCTTGGGGGTGGGGGGATAGAGGCATGGAATAGGTGCTCTGACCTCTGACCCTCTAG ....((.((((((.(((((.((((.((((.......)))))))).))))).)))))).)) (-27.10)	4	1	28.5	229	145

## Sheet: Human mirtron candidate
Gene (Intron)	Fold; ΔG (kcal/mol)	5p reads		3p reads		Intron length	miRBase ID	Failed Criteria
		Perfect	Tailed	Perfect	Tailed
Human mirtron candidate
ACACB (51)	GTGGGCCTGGGGTGAGAACGAGGCCGGTGAGCACAGGGGGTGCTGGGGGCTGAGACAGCTGGCCCACAGCTGGGTCCCTCTCTGAGGCATCCTCTGCCCCCTCCCCAG .((((...((((..........((......)).((((((((((((((((((....((((((.....)))))))))))))......))))))))))).))))..)))). (-50.10)	6	0	4	13	108
ARHGAP30 (8)	GTAAGTCTGGGGAGATGGGGGGAGCTCTGCTGAGGGTGCACAAGGCCCTGGCTCTACACACATCCCTGTCTTACAG (((((...(((((..((...((((((......(((((.......)))))))))))...))..)))))..))))).. (-29.60)	1	0	67	42	76
CACNA2D2 (31)	GTGAGGATCAGGAAGAGAGTGAAAGAAGAGAGTAGGGATTTGAGCCTTCTAGGGGTGTAGCACTGCCAGCCCT ..((((.(((((..........................))))).))))..((((.((((....)).)).)))) (-10.07)	78.5	18.25	0	2	103
CASKIN2 (11)	GTAGGATGATGGGGTCACGGACCAGGTCAGGGCTCACTCCCCACTGCCAGTTCCCCAAATGCTGAGTTGGCTCCTGCCCTGTCTCCTCCAG ..((((.(((((((.((.(((((((.(((((((............))).............)))).)))).)))))))))))))))).... (-32.01)	30	13	0	2	91
EIF4G2 (6)	GTAAGTGGTAGTTTTTGTTTGCTTGTTTTAAAGTTGACTTGAAAAATTTCCTTAATAAAGCATGACAATGTCTTCTTTTCCAGACATTC ......((.((((((((((.((((......)))).)))...))))))).))...............(((((((........))))))). (-13.80)	6	1	55	71	83
FLNA (5)	GTGAGTGGGGACTTGGGAAGGAGCTCGGGAGCCAAGGAGGCCAGACTGTGCCAATGAGCTGCCCTGACCTCAGCCCCACTGCCCCACAG ....((((((...((((...(((.((((((((((....(((((...)).)))..)).))).))).)).)))...))))...)))))).. (-37.40)	197.5	119.5	0	2	89
MAP3K6 (5)	GGAGGTGAGGACGCGGGACTGGGAGCTCGCGGAGGGCGAGGGGCCGCGGGCCCTGCTGAA ...(((..((.(((((..((....((((.....))))..))..)))))..))..)))... (-24.20)	36	15	0	567	82
PKD1 (45)	GTGGGTACGGCCCAGTGGGGGGGAGAGGGACACGCCCTGGGCTCTGCCCAGGGTGCAGCCGGACTGACTGAGCCCCTGTGCCGCCCCCAG .((((.....)))).((((((((..((((...((((((((((...))))))))))..(((((.....))).))))))...)).)))))). (-49.50)	25	6	7	1	90	hsa-mir-1225	Dicer cleavage inconsistent
PKN3 (10)	GTGTGGAGGGAATGGGGGCTATGTGTGAGGGAGCAGGGCTGGGGTCCCGGGACTAAGCTCCCCCTTTTCTCCCAG .((.((((..((.(((((.....(((......))).((((..((((....)))).)))))))))))..)))))). (-31.30)	30	10	3	1	75
PLCB3 (3)	GTGAGTGATGAGCCTGGGAGTGAAGACCACAGCGAGGCTGTGCGGGAGCCCCCTCTTCACCCTTCGCTGTCACCTACTCAG (((.(((((.(((..(((.((((((..((((((...)))))).(((....))).)))))))))..)))))))).))).... (-34.40)	30	8	6	1	81
PSMB10 (2)	GGAGCTGGAGGGGAGCCGAGAGTATCGAGCAGGCACTGAAGCTGCGGTCCCTCCCTCTCCTCAG ((((..((((((..((((..(((.((.((......)))).))).))))))))))..)))).... (-26.90)	4	2	7	25	85
RPLP1 (3)	TATAGACAAAATTGCCATTAATTTTTCACAAGTATATGAAGTATGGAAATCCTAACACCTGATTGACTTTTTTTTTCTAG ..((((.((((...((((.....(((((........))))).)))).((((.........))))......)))).)))). (-6.40)	0.78	0	24	105	140
RPS2 (4)	GTAGGCTGGTGGCAGGTGATGGGCCTGCCGTGGGGCAGGCTCCCTCGGGCCCCCGTCTCCTGACTCCTTCCCTCACCAG .....(((((((((((.((((((((((((....))))))).((....))...))))).))))..........))))))) (-35.90)	59.5	56	4	10	79
RRP9 (4)	TGTGGTAAGTGTGGAGGGAGAGTTGGGGGAGGACGGGGGTGGAGCTGATCTGCTCCCAGGGTCTCATCCATCTCTTCTCCATGCAG ........(((((((.((((((.(((..((((..(((((..((.....))..)))))....))))..))).))))))))))))).. (-41.90)	12	1	3	10	82
SIDT2 (3)	GTCTGCAGGGTAGAGTGAGGGGACCACGGGGGCTGGTTCTTCCCCAGGCTCCGGGGGTGACTGGTGGGGGCTCTTCTCTGCCCTGCAG ..(((((((((((((.(((((..((.(((((.((((.......)))).))))).((....))....))..)))))))))))))))))) (-52.00)	53	37	0	2	88
TBL3 (4)	GTGTGTTGGGCCGGGACATGGGCAGGCGGTAGGGGCTGGGGAAGGCCTGTGGACCTGAGAGTCTCAGCAGCCCTGTCCCCACCCACACAG .((((.((((..((((((.((((......((.(((((......))))).))...(((((...)))))..))))))))))..)))))))). (-43.50)	27	12	0	3	90
TRIOBP (20)	GTGGGCCTGGCCCCAGGTTGGGGGGACACGGGTGGGTCCCGGCACCCCTCCCCTGACCACCGTGCCTCTCCCAG .((((...(((....(((..(((((....(((((........))))).)))))..))).....)))...)))). (-34.80)	0	3	13	134	74
VPS16 (16)	GTGAGGGCAAGGCTGGGGGGCCCCTGGGCTAAGTGGGAGCCTGGCTGGAATTCCCACTCCACCTTACTCTCCTGCAG (((((((.((((.(((..((((....)))).(((((((.((.....))...)))))))))))))).)))))..)).. (-33.70)	0	12	19	13	77
WRAP73 (7)	GTGGGAACCAGTGCAGGGCACTCAGGAAGTCCGACCGCCCAGCGGGCCGGGCCCTGCCTCACCTGTGCATGGTTTCCTTCCTCAG ..(((((((((((((((.....((((..(((((.((((...))))..))))))))).....))))))).))))))))........ (-42.10)	23.5	19	0	1	85
