# Supplementary material
Source: HighWire-hosted journal article supplement (https://genome.cshlp.org/content/suppl/2012/08/22/22.9.1634)
Supplement: Supp_TableS5_mouse_loci.xlsx [file Supp_TableS5_mouse_loci.xlsx]

## Sheet: Mouse 3p tailed mirtron
Gene (Intron)	Fold; ΔG (kcal/mol)	5p reads		3p reads		Intron length	miRBase ID	Failed Criteria
		Perfect	Tailed	Perfect	Tailed
Reclassified Mouse 3p tailed mirtron
Mirg (1)	GTAAGTGTGCCTCGGGTGAGCATGCACTTAATGTAGGTGTATGTCACTCGGCTCGGCCCACTACCCAAT ((.((((.(((((((((((.((((((((((...))))))))))))))))))...))).))))))..... (-30.80)	303	99	15793	4072	92	mmu-mir-668
Novel Mouse 3p tailed mirtron
Syn1 (11)	GTAAGTGAGGGCAAGCCTTCTGGGTTCCTACCATCCCAGGCGGCCTCAGCTCTCACTCACTCTCA ((.(((((((((..(((.((((((..........)))))).)))....))))))))).))..... (-29.50)	76	18	38	8	92	mmu-mir-5617
Sirt7 (1)	GTGAGCCACTGCCGTGCCCGCGCTCGCGCCGGCGCGCGCGGTCGCTCACCCGCT ((((((.(((((((((((.(((....))).)))))).))))).))))))..... (-35.70)	28	32	58	43	66	mmu-mir-6936
Ptprs (20)	GTGAGGCGCTGTGGGCACGGCTTGGCCCCGAGGCTTCCAAGGCGTTGCCTGACCCTGACCTCAT ((((((((..(((((((((.(((((((....)))...)))).))).)))).))..)).)))))) (-27.20)	42	25	110	32	79	mmu-mir-6977

## Sheet: Mouse 5p tailed mirtron
Gene (Intron)	Fold; ΔG (kcal/mol)	5p reads		3p reads		Intron length	miRBase ID	Failed Criteria
		Perfect	Tailed	Perfect	Tailed
Known Mouse 5p tailed mirtron
Oaz1 (5)	ATTGCTTGGGAGGGTCCTGGGGAGGGGAGTTCTGGCACCCCAACCTCTCACCCTATGTTCTCCCACAG ......((((((((....(((((((((.....(((....))).)))))).)))....))))))))... (-26.40)	51.07	33.07	365.25	197	74	mmu-mir-1982
Ddx5 (1)	TTTGGTCTGGCTGTTGTGGTGTGCAAAACTCCGTACATTGCTATTTTGCCACACTGCAACACCTTACAG ....((..((.(((((..((((((((((...((.....))...)))))).))))..)))))))..)).. (-23.60)	990.5	397	112.5	25	1265	mmu-mir-3064
Tkt (12)	CACAGGGGAAGCTCAGTGCCAGCCTTTCTCTTAGCCGCACTCTGGTCTTCCCTTGCAG ..(((((((((((.(((((..((..........)).)))))..)).)))))))))... (-21.20)	249	165	262	298	962	mmu-mir-3076
Gm10094 (1)	GGCCTGCGGACGGGTGGGCGGGCAGGCCAAATGGCGCGCCCGAGGCTGACTCCCTGCTTCTCCGCAG ...(((((((..((..(((((((..(((....)))..)))))..........))..))..))))))) (-34.10)	24	13	70	260	133	mmu-mir-3077
Stub1 (4)	TGGTGGACAGAGTGTGTGTGTCTGTGTGGAGACAGGAGTTGCCCACACATGGCACTCAACTCTGCAG .......((((((.((.((((((((((((.(((....)))..))))))).))))).))))))))... (-29.90)	75.08	35.67	124.83	232	178	mmu-mir-3082	Mature 5p heterogeneity: 78%
Abca2 (28)	TAGCACAGGGCAGGGCAAGAGTTGAGACTTATGGCTCCTAACTCACTGTCATGTCCTCAG ......((((((.((((.((((((((........)))..)))))..)))).))))))... (-17.90)	348.83	93.33	128	158	82	mmu-mir-3087
Nfx1 (7)	TAGATTGTTGGGGACATTTTTAAAGCATGGATTGGTTATTGATTTGTCCTTTAAATTGTGTCCTCAAG .......((((((((((.(((((((.((..(((.......)))..)).)))))))..)))))))))). (-21.90)	173	19	37	19	1875	mmu-mir-3094
Rgs12 (6)	AGTGACACAGGTGGGAAGTGTGTGTCCAGTGGGTGTGTCTACAGATCTGCTCAGACCTTTCTACCTGTCAG ......((((((((((((.((.((...((..(((.((....)).)))..)))).))))))))))))))... (-29.40)	170.5	118.5	135	125	709	mmu-mir-3097
Dmpk (4)	TGTGCTTGGGAACGGGGTGTCTTTGGGAGTCTTGGGGGCTACCAAACCCCTGTGACACACCCGCTCCCAG ......(((((.(((((((((...(((.((.((((......)))))))))...))))).)))).))))). (-36.00)	43	27	29	13	308	mmu-mir-3100
BC017158 (4)	GGAGGAGGGAGGATCTGCTGTTAGAAAGTCTCTGGTTTGTGACCTCTAACCTCTGATCCTTCCCACAG ......(((((((((....((((((..(((..........))).))))))....)))))))))..... (-22.70)	126	16	83	48	89	mmu-mir-3103
Gnb2 (6)	GTCAGGGGAAGGGAAGAGATGCACTGTCCTCTAAAATGCCTGACTGCAACCTCCTTTCTCCAG ....(((((((((.((...((((..(((.............)))))))..))))))))))).. (-18.72)	39	4	75	633	93	mmu-mir-6418
Syvn1 (13)	TCGGGGTGGAGAGCTGAGGCCCAGGTAGCTCAGCCTGACCTCTGTATCTCCTGCCAG ....((((((((((.((((..(((((......))))).)))).)).))))).))).. (-25.40)	9	5	42	713	82	mmu-mir-6988
Reclassified Mouse 5p tailed mirtron
Ryr1 (34)	AGGGCTGGGACGAGATCATGAGGCCTTCCTGGCCACTGGGAAGGACTCGGCCCTTGTCCCGCAG ...((.((((((((....((((.(((((((((...))))))))).))))...)))))))))).. (-33.10)	12	10	1	2	2077	mmu-mir-1963	5p + 3p reads: < 50
Fam65a (5)	GTTGGAAGGGAGCTGGCTCAGGAGAGAGTCCTGAGATTTAGGCTCTTTCTGACTCAACTCTCCCTTAG .....(((((((.((..(((.(((((((.(((((...)))))))))))))))..))...))))))).. (-28.10)	128	42	24	33	92	mmu-mir-1966
Brsk2 (12)	CCAACTAGGGGGCAGGAGCCGGAGCCCTCTGCTGAACTGACAGACGCTCTGCTTTGCTCCCCCAG .......(((((..((((.((((((..((((.........)))).))))))))))...))))).. (-26.10)	9	1	28	27	3803	mmu-mir-3104
Cnot3 (11)	CAGTTTGGGGAACAGGGCAAGGTGGACAGTAGCTGACAGCCTGTTTACACTTGTCCTTCTTTCCCCAG .....(((((((.((((((((((((((((..((.....)))))))))).))))))))...))))))). (-33.80)	312.33	180.5	71	138	80	mmu-mir-3572
Cd74 (8)	AGATGTTGGGCAGAGGAGGCAGGGACAACAAACTGGTGGCCCAGCTGTATCAACCTGTGCTTCTCTTCCCAG ......((((.((((((((((((....(((..((((....)))).))).....))))).))))))).)))). (-28.90)	2375.5	3500	29	9	230	mmu-mir-5107
Zeb2 (1)	TGAATATGTGGGGGCATTGGTATTTTCAAAGCAGCATTTTGAATGTGCCTGTGCATCTCTTCCCACAG ......(((((((((((.(((((.(((((((.....))))))).))))).))))......))))))). (-24.80)	306	126	117	24	86911	mmu-mir-5129
Irak1 (1)	GCCGGCGTGGGGTGGTGGACTCAGGCTTCTGGAGCTGAAGCCTGATGTTCCCCATCCCGCAG ......(((((((((.(((((((((((((.......))))))))).)))).))))))))).. (-38.40)	328.5	388	50	141	76	mmu-mir-5132
Ccnf (9)	CAGACTTGGCAGAAAGGGCAGCTGTGATGCTTGTCCTAGTTTTCACGGGTGGCCCTCTTTCTGCAG ........((((((((((((.((((((.(((......)))..)))))).)).))))..)))))).. (-27.70)	120.08	40	18	94	2546	mmu-mir-5134
Inpp5b (4)	GGCTATGTGGGTGGGACAGGGATGTTCAGTTGCTAAAGACATTCTCGTTTCCTTCCCTCAG .....((.(((.(((((..(((((((...........)))))))..)))))...))).)). (-17.30)	31	50	5	1	140	mmu-mir-698
Pdia4 (5)	TGCACAGCTGGGAGCTAGAGGATGTGGTCAGCTGCAAGGATCTTCCTCAGACATGTGCTCTGCTCCTAG .......((((((((.((((.(((((.....(((..(((.....)))))).))))).)))))))))))) (-28.10)	158	68	14	166	115	mmu-mir-704
Novel Mouse 5p tailed mirtron
Nav1 (18)	GTCAGTGTCTGGGCAGAGCTGCAGGAGAGAAGGGCAGGGCCGGACATCTCTGCCACCCTGCCACCTGCCCTGTCTGTTCTGCCCACAG .........((((((((((.(((((..((...(((((((..((.((....)))).)))))))..))..)))))..))))))))))... (-45.00)	174.08	60	13	11	88	mmu-mir-1231
Dnaja4 (3)	AAGAGTCTTGGGACATAGTGTAAGGCAGTGGTCTGGCTAGTCCCACTAACTGGCTCTTTGTCCCTCGGCAG ....(((..((((((.((.((.((..(((((.((....))..)))))..)).)).)).))))))..))).. (-27.10)	70	15	13	30	2139	mmu-mir-5710
Unc13a (43)	TGCTCCTGGTGGGTGGGGAAGAGCCTAGTTCACATCAGGCATCTTCCCTGTCCCACCCAG .......(((((((((((((((((((.((....)).)))).))))))))).))))))... (-31.20)	15.33	6.33	21	186	3470	mmu-mir-6769b
Bpag1 (7)	TTTCCTTTGTAGGCGACGAGAACCCGTGCCTGGTGTGTAATAATCACTGTTTCTCTCTCTCACCTACAAACAG .....((((((((.((.((((..(((....))).(((.......)))........)))))).))))))))... (-18.10)	243	79	7	4	1236	mmu-mir-6896
Ugcgl1 (13)	CTGGGGGCAGTGTCACACGCTGTTTTATGACGTAAGTCTCACGGTCTGTGTTCTTCCCCCAG (((((((.((...((((.(((((.....(((....)))..))))).))))..)).))))))) (-29.90)	168	19	0	10	1780	mmu-mir-6897
4632411B12Rik (12)	ATCCCTGTAAGGGGAGATGCAGGGAGCCATGCCGAATGATGCTTGGATTCAAGTCTCTTTGTACCTTCTCTACCCAG ....(((..(((((((.(((((((((.(((.....)))..(((((....)))))))))))))).)))))))...))) (-23.10)	61	51	5	0	136	mmu-mir-6898
Klf7 (2)	CAGGCAGCAGAACGCAGCGGGCATGAGATCCTTTCTGACCATTGTCCTTCTGTGTCTTCTGCAG ...((((.((.((((((.((((((((((.....)))...))).))))..)))))))).)))).. (-22.10)	21	5	90	81	36269	mmu-mir-6899
Ndufa10 (4)	TCATGTGCCAGGAGAAGCCTAGAGCCGTCTGGACTCTGATGGTGATGGGCTCTCTTGTAG ........((((((.((((((..((((((........))))))..))))))))))))... (-27.60)	76	40	142	343	2898	mmu-mir-6900
Sned1 (14)	CTAAGTGCAGGAATGCAGAGGACCTCGTGGTGAAAGGACCTTCTGTGTTCTTGCAGCTCCCT .....((((((((((((((((.(((.........))).))).)))))))))))))....... (-24.30)	31	83	6	75	144	mmu-mir-6901
Ppp1r7 (1)	CTGTGTTCCTCACATTGTCACATGAAGTAGATGTGAATTGTCACCATGTGATGTGTGGGTTCAG ...((..((.((((.(((((((((........((((....)))))))))))))))))))..)). (-19.70)	30	1	63	72	2444	mmu-mir-6902
Atp2b4 (13)	CCCTTTTGGGAAAAGCAGTACTTACCACATGTCTTCAGGTGGCACGCGTGTGTTCACTGTCGTGTGTGTCTGTTTTTCCCAGGTATCA ....((((((((((((((.((....((((((....(((..(((((....)))))..))).)))))).))))))))))))))))..... (-34.20)	88	6	0	21	1159	mmu-mir-6903
Parp1 (8)	TCCTTTCCTGGGGTTAGAGTTGAGTGGTCGTAGCCTGTTGCTTCTGATCTCTTACCCCAGACAAG ..(((..(((((((.((((.....(((..((((....))))..)))..)))).)))))))..))) (-21.40)	73	17	4	12	1270	mmu-mir-6904
Med23 (27)	GGGAGACTGGGCAGGTTGGGTTGAATGATTTGATCATGTAGTCACTTAAATAACCTTATCTGCCCGATAG ((....))((((((((.((((((..(((..((((......)))).)))..)))))).))))))))..... (-24.50)	83	21	17	4	815	mmu-mir-6905
Spock2 (7)	GATGGATGGGCAGACGGACAGACAGCAGAGCCTACCTGAATTCCGGTCTCCTCTCCAG ..((((.(((.((((((((((..((......))..)))...)))).)))))).)))). (-17.80)	26.5	11	9	101	563	mmu-mir-6906
Rrp1 (4)	GCTTCTGGGACACAGGGAGGCTCGATGGGTTGGCTGTCTTCTTACTAACGTGCGTTTCTTTTGTGTCCTAG ....(((((((((((((((((..(((((.....)))))....(((....))).)))))))).))))))))) (-25.70)	18	10	21	12	659	mmu-mir-6907
Pdxk (7)	GAAGCTTGCCTGTCAGGGAGAGCCCCAGTGTGTGGATGCTGACACTCTCCCTTGTGCTGGCAG ......((((.(((((((((((...((((((....))))))...))))))).)).)).)))). (-26.00)	5	9	19	48	1855	mmu-mir-6908
Ppap2c (1)	GATAACAGGGGGGCTGGAATGGGCACTGCGGAGAACCATGTGCCTTCCCCGGCCTCCCACAG .......((((((((((...((((((...((....))..))))))...)))))))))).... (-33.90)	63.5	84	1	7	2595	mmu-mir-6909
Ptbp1 (11)	GCACCTGGGGGTAGGGCACCAGTGGGCAGAGTGTCCTGCTGCTCATGGTTTCCACCCTTTGTCCAG ....((((((((.(((.((((.(((((((((....)).))))))))))).))))))).....)))) (-28.30)	21	26	30	9	111	mmu-mir-6910
Dazap1 (5)	TGGAGTGGGCTGAGTGGGTCTGTGGCATCTACCCCCACAAAGCCTGCCTCAATCACACTCTGTCCACAG ....((((((.((((((((.((.((((.................)))).))))).))))).)))))).. (-25.83)	84	42	104	200	550	mmu-mir-6911
Scamp4 (2)	TGAAGTACAGGGAGGGTGCTCAGGCAGGCATCTGGCTGTAGCAGGCTACCTGAGGGTCTCCTTCCTGCAG .......((((((((..((((...((((....(((((......))))))))).))))..))))))))... (-28.40)	190	194	7	12	479	mmu-mir-6912
Dohh (2)	TGACCTGGGAGACCAGTCAGGTGTTGGGCATCAAGCAAGCTCCTCTCTACTGATTTGTCTCCTCAG ....(((((((((.((((((.....((((.........)).))......)))))).)))))).))) (-23.90)	38	14	37	45	365	mmu-mir-6913
Ankrd52 (10)	CTGACTCCTGGGGTGGTGGTGGCCACAGAAACGAGGTCTTTAACTCTGTCCACCTCTTCCCAGGCGCGG (((...(((((((.((.(((((..(((((...............)))))))))).)))))))))..))) (-26.96)	7	4	0	189	154	mmu-mir-6914
Ankrd52 (21)	AAGACAGGTCAGAGCAGATGGAGGTTCGTGGTATTTCTCACCCTCACCAACTTCCTTCCTCGTGCCCAG ......((.(((((..((.(((((((.((((............)))).))))))).))))).)).)).. (-18.00)	58	22	14	46	142	mmu-mir-6915
Esyt1 (26)	GCAGGCAGGAGGATGGAGATGAGTCACGGGGTTCTTAGATGCTTGGTCTCCCTCTTCCTACAG ......(((((((.((((((.((.((..((....))...)).)).)))))).))))))).... (-19.30)	1256.23	520.08	3	4	90	mmu-mir-6916
Erbb3 (3)	GAAGGTGTGGAAGGGGAGTTGTGCCGCAGTCTTCAGCCTGTCACTTCTCTTCCCACCACAG ...((((.((((((((((.((....((((........)))))))))))))))))))).... (-24.70)	25.5	4	19	23	575	mmu-mir-6917
Nipsnap1 (8)	TCTTGTGCTGAGGACGGGATTAGGTTCTCTGAAGAATGAGCCTGTGCCCTTCTCACAG .....((.((((((.(((..(((((((..........)))))))..))))))))))). (-21.20)	84	33	5	2	1416	mmu-mir-6918
Mgat4b (6)	TGCGGTAGGCCACTGGAGGTGGAATTGTCTCTGCCTCTGAGGCTCCTCCTCCTGGCCCACAG ....((.(((((..(((((.(((...(((((.......)))))))).)))))))))).)).. (-29.60)	35	1	0	19	169	mmu-mir-6919
Aff4 (17)	TTCCTACACAATGGAAAGACTGCTTGTAGATGGCGCCATGTCTATATACACTGCCCTTTTCCATTGCCTAG ...(((..((((((((((...((.((((...(((.....)))....))))..))..))))))))))..))) (-18.20)	92.5	13	5	1	797	mmu-mir-6920
Srebf1 (17)	CTGAGGGGCATGAGGTAGGAAGCCGGGAGTGGGGGGACAGTAAATCTGAAACGGGTGACTACTCCTTGCCTCTCAG ((((((((((...(((((....(((....((((...........))))...)))....)))))...)))))))))) (-27.00)	53	21	11	76	97	mmu-mir-6921
Srebf1 (12)	ATTGGTGTGGGAGGGGACTGTAGAGAGGAGGGTGCCTAACCTCTGTTCTGCTCACCCTTCTCACAG .....(((((((((((...((((((.(((((........))))).))))))...))))))))))). (-34.50)	41	35	41	4	500	mmu-mir-6922
mKIAA0050 (5)	TGGACAGAGGATGGGGATTTGGCGAAGTTCCAGGTCTTTTACTCCTTAATCCCCACCCTTCAG ......((((.((((((((.((.((((........))))....))..)))))))).))))... (-19.40)	1564	380	2	9	350	mmu-mir-6924
Kif1c (10)	AAGCCTGAGGAAGAGAAGGCTTGGACTGACTCATCCTGATTACCGTCCCCTTTTATCCCTCAGCAATCAA ..((.(((((...((((((...((((....((.....)).....))))))))))...)))))))...... (-19.80)	98.2	34	0	35	87	mmu-mir-6925
Sgsm2 (5)	TCGGGTCAGTGGGGTGAGGGATGGTGATGAAAGAGCCCCAGCTAAATTCACCATCCCTGTCTCCATAG ........((((((..(((((((((((......(((....)))....)))))))))))..)))))).. (-31.50)	35	32	12	3	97	mmu-mir-6926
Atp6v0a1 (8)	TTCCAAGGGGATTTGCATGGACTGCACTAAGACACTTCAGTGTTCCTAAAGCTGTTCCTGTACTCTCCAG ......(((((..((((.((((.((..((.(((((....)))))..))..)).)))).)))).))))).. (-20.10)	21	8	30	106	1151	mmu-mir-6928
1700113I22Rik (5)	GAGGGAGGGAGGAGCAGCATCTGTGAAGGCTGCCATAGAAACCACAGGTGCTGTCTTCTTCTTCCAG ...((((((((((((((((((((((....(((...)))....))))))))))).))))))))))).. (-36.30)	34	17.5	9	16	2678	mmu-mir-6929
Slc25a39 (6)	TAGGGAAGGGGGTGCTTGAGAGGTTTGGGAGCCCTTAAGTGATTTTCCTGGCCTCTCCATACTCCCAG .......(((((((...(((((((..(((((............)))))..)))))))..))))))).. (-27.10)	88	40	0	4	92	mmu-mir-6930
Dcakd (2)	GTCACTGGGGTGGGGAGTGGGGGACTTCTGAATCACTAGAGGCTCTGGAATGACCCAACCTCTTCATACCCCAG ....((((((((.((((.(((((.((((((......))))))))).((......))..)).)))).)))))))) (-29.90)	16	3	35	11	302	mmu-mir-6931
Helz (20)	AGTCTTTGTAGGTGAAGTAGACTTGGCTGACAGATGCTCTGTTCTGCTTCCTCTGCAG ......((((((.(((((((((..(((........)))..)).))))))).)))))). (-21.40)	131	26	29	53	1468	mmu-mir-6932
Pgs1 (4)	TGGTCTGTCTGGCGGCAGTCAGGATACCTGTCTTTCCTGGTAGGAATGAGTTACAGGTGTTTCCTCTGCCGTCACACTCAG ......((.(((((((((...((((((((((((((((.....)))..)))..))))))))))...))))))))).)).... (-33.30)	511	1478	34	8	635	mmu-mir-6933
Tbc1d16 (8)	AGGCCTTGGTGGAGACAGCAAGGGTGGGATGGTTCAAGCCACCTCTGCTCCTGCCCCACCAG ......((((((....((((..(((((...........)))))..))))......)))))). (-23.40)	63	57	1	2	1006	mmu-mir-6934
Actg1 (3)	GTGGGTGTGGGAGGCTCAGGGCCCCTGCTACTCACTCACTCAGGTGTTCTTTGTCTTTCCACAG .....((((((((((..(((((.((((.............)))).)))))..))))).))))). (-21.42)	101	220	22	65	286	mmu-mir-6935
Adi1 (2)	TAGCTGTAAGGGCTGGGTCTGTGTGATCGGTCTCCAGGAAACTCACAGGTTCCCCCTTGCACTAG (((.((((((((..((..(((((.((....))...((....)))))))..)).))))))))))). (-23.50)	74	42	30	11	1492	mmu-mir-6937
Mlh3 (7)	AGTGTTTGGAGCTAGCTCCAGAGAGAGTGAAGTCATGCTTGTCATCTGGGGCTGTCTCCTTAG .......((((.((((((((((..((((........))))....)))))))))).)))).... (-26.70)	19	3	16	17	1689	mmu-mir-6938
Akt1 (4)	GAGCCAGGCAGCTGGTTGGTGGAAGCCATGCAACAGCGCCCCCAGGTGCCTGAGGCCTCACTTGACCCGCTGCAG .......(((((.(((((((((..(((...((...(((((....))))).)).))).))))).)))).))))).. (-29.60)	4	3	14	116	273	mmu-mir-6939
AW555464 (5)	AGAGGCAGGGCTGGCTGGAAGGTTTTTCGAGGCTGGCTCAGCACCCCTTACCTTCCGTGCTTGCCCGCAG ....((.((((.(((((((((((........((((...)))).......)))))))).))).)))))).. (-31.56)	3.33	2	89	34	833	mmu-mir-6940
Jag2 (3)	GCACCCCTGGGGGACTGACGGGTAGCTGCTGCCGCCAGCTAACTCGGCTGCTCCCAAAG .......((((((.....(((((((((((....)).))))).))))....))))))... (-22.80)	24	17	6	5	1517	mmu-mir-6941
Zkscan3 (1)	GGGCCTAGGAGGAGGGGAACATTTGCAACTATAGTGGCTTATGGTTCTCTCCACCTCTCAG (((...(((.((((((((.(((..((.((....)).))..))).)))))))).)))))).. (-23.20)	146	54	4	1	5814	mmu-mir-6942
Grk6 (10)	GGAGATGGGGTGAGGTTGGAAGCTAGGCCTATCAGTGAACCCACCTGCTTCCATACCCCTACCCAG .......(((((.((((((((((.(((................)))))))))).)))..))))).. (-23.59)	196.33	90.33	131.5	370	87	mmu-mir-6943
Pdlim7 (5)	CACGTCCTGGGAGGGGCAGCCCCTGGTGCCCACAGAACCAGAGGTTCTGAGCTCTGCCCTTCCCATAG .......((((((((((((.....(((.....(((((((...))))))).)))))))))))))))... (-32.00)	53	23	171.14	110	239	mmu-mir-6945
Sec24c (14)	AAAAGAAAAGGGAGAGAAAGAAATGCAAGGTGGGCAAAGCTATTTGACATTTCTTCTCTTCCCTTTCAG ....((((.(((((((.((((((((((((...(((...))).)))).))))))))))))))).)))).. (-27.80)	195.56	15.14	21	270	683	mmu-mir-6946
Actr8 (8)	GGGCTCATCCAGTGGAGAGGCTCGTGCACGCTCCTACTGACAGCAGCCTCTTTCCCTGGCATCAG ..(((....((((((((..((....))...)))).))))..))).(((.........)))..... (-19.70)	19	73	6	3	610	mmu-mir-6947
Acin1 (12)	GGATCAGTTCAGACAGGACTGTGACACACTTCTCTGCCTCTGTCCTTCCTGTCTGACCACAG ......((((((((((((....((((..............))))..))))))))))..)).. (-17.74)	132	15	41	20	675	mmu-mir-6948
Mcpt8 (4)	GGGAGAAAGTGGGTCTAGAAAGAGGTGAAAAGAGTATTTACTAAAACTTCCCCTTTTTCTATCCACAG ........((((((..(((((((((.(((...(((....))).....))).))))))))))))))).. (-20.60)	112	6	1	11	479	mmu-mir-6949
Loxl2 (12)	CTCTGTCCTGGAGTGGAGGACAGTCAGAAAGGCAGTTGTAGCATTCTCTGTCTTGATCCTCTCCAGGTTGTCA ......(((((((.(((((((((..((((..((.......)).))))))))))...))).)))))))...... (-27.40)	74	10	1	24	2043	mmu-mir-6950
Azin1 (12)	TTTCATTGTATTTGTGTGATTAAAGTATTAGAAGTATTGAAATTCTGAGTTTTGCTTTTTTCTTCACAAATACAG ......((((((((((.((..((((((((((((.........))))))....))))))..))..)))))))))). (-21.00)	82	10	2	16	1003	mmu-mir-6951
Scrib (11)	CCTGAATGGTGGGCGGTGAAACAGAGAGCTTAGCATGGGTCTCTGACTCTGCCTCCCACAG ........(((((.(((((..((((((.((......)).))))))..)).))).))))).. (-26.00)	289	105	40	103	82	mmu-mir-6952
Grina (2)	AGGGTAAGGGGCAGGGGCAGGGATTCAAGTGCCCTCAGGGGACACTGACCCAGCCTCTATGTCCCCAG .......(((((((((((.(((..((.(((((((....))).))))))))).))))))..)))))... (-32.40)	8	1	32	38	81	mmu-mir-6953
Heatr7a (24)	TACTCTGGGGCAGTTCTGGGGGCAGATATGCAAACCTCCTGCAGCCAGCTCTTCCCCTAG ......((((.((..((((..((((.............))))..))))..)).))))... (-21.62)	49	45	5	44	875	mmu-mir-6954
Gga1 (12)	AAGGGAGGGCCTCAGGACTCAGGAGGTGACCCTAACACTTTGGAGAGTCTCACACCTGTCTCCTTTGCCCACAG ......((((...((((..((((..((((..((..((...))...))..)))).))))..))))..)))).... (-25.60)	258.33	137.33	7.5	2.5	412	mmu-mir-6955
Triobp (21)	GCAGGCAGTGAGTGGGTGGGACTGGCCTGGAGTCAGTCACCCTGACCGGCCTATCCTCTCAG ........((((.(((((((.((((...((.((.....))))...))))))))))).)))). (-24.60)	12	4	44	419	77	mmu-mir-6956
Grap2 (5)	ACTGCCAGAAGAGAGACAGGATCTAGGGAAAGGATGAATCTGGATCTCTTGTTTTCTCTTCCAG .(((...((((((((((((((((((((...........)))))))))..))))).))))))))) (-21.40)	132.5	124	25	12	2326	mmu-mir-6957
Sbf1 (11)	GTGCCTGGGAAACCTGTGTCGGGCTGTGAGTGTTTTCTGGGACCTGATACTCACTGCACCGACCTGCTCTCCCAG ....((((((.......(((((((.(((((((((...........))))))))).)).)))))......)))))) (-31.22)	69	60	3	38	337	mmu-mir-6959
Troap (8)	CTGGGCAGGATGAGAAGAGTTTGGCTGGAAGCCCTGCTCAGCCAACCACCTCTCTCCTCAG (((...((((.(((.((.(((((((((..(((...))))))))))..)))))))))))))) (-20.10)	2184.5	1166.5	5	2	1963	mmu-mir-6960
BC141885 (1)	AAAGCTGACTGGGAAGGAAATGGCCAGGGCTCTCTAACTAACCTGTCCTCTTTCTTCCTGGCTCTAG ......(((((((((((((..((.((((.............)))).))..))))))))))).))... (-23.32)	77.5	102.5	28.5	6	1037	mmu-mir-6961
Acvr1b (1)	CGGAAAAGGACCTGGTGGGAGATCTCACATCACTGTTGATATCTGCCCTTCCCTGTCCTATAG ......(((((..((.(((((((.(((((....))).)).)))).)))..))..))))).... (-20.00)	171	74	27	4	19696	mmu-mir-6962
Itga5 (22)	GGGAAGGTGGGATGGATGGCAGAACCTGGAGATTCTTGTCAAACTGCTTGCCTCTTGCCTCCATCCCACAG ......((((((((((.((((......((((......((......))....)))))))))))))))))).. (-26.50)	32	13	15	9	119	mmu-mir-6963
C2cd2 (8)	CCCCCTTGGGGTGTGAGACTGGAAACATCACCATTGTTCTTTCTTGTCTTCCACTCTAG ......(((((((..((((.(((((...((....))...))))).))))..))))))). (-19.00)	17	13	6	64	2377	mmu-mir-6964
Ccnf (6)	GCGGGAGAGGGAGGCTATTGGGCAGGAGATGAGGAAGAACCTTCTGTGCTCGGTCTCGCTCCAG ...((((...((((((...(((((..(((..(((.....)))))).))))))))))).)))).. (-21.80)	3	2	20	49	504	mmu-mir-6965
Narfl (7)	TGTCCCTCGGGGATGTGGACAGCACAGCCATCTCAGATCAATGAGAGCATGTGCTGTGTGCTTCCTCTGCAG ........(((((.(((.((((((((((..(((((......))))))).)))))))).))).)))))..... (-31.60)	88	43	22.07	30	443	mmu-mir-6966
Kifc1 (2)	AAAGGCAGGGAGGGATAAAGACCAGTCACTATGGAAACTCATCTTTATCTCTCCCCAG .......(((((((((((((((((.......))).......))))))))))))))... (-22.31)	121.5	36.5	85.58	320.33	88	mmu-mir-6967
Phf1 (6)	AGGGGGCGAGGGGGCCCTGTGGTTTCAAGAAGGCTGTCTGAGGGCCACAAGCGCTGTCTCCCCTCCAG .(((((.((((.(((.(((((((((..(((......)))..))))))).)).))).)))).))))).. (-32.60)	13	10	45	243	142	mmu-mir-6968
Clps (2)	GTTCCCAGCAGAGTAGGGAGCAAAAGATAACCAAGTGACTCTGTTGTTCCCATCTCTGCAG .......((((((..((((((((.(((..((...))...))).))))))))..)))))).. (-24.30)	544	62	1007.33	2884.33	320	mmu-mir-6969
Skiv2l (19)	TGGGGTGGGGGAGGGTGTAGAGGCTGGGCTGGCAGACTCATCACAGCCTCTGCTTCTTCTCAG ........(((((((.((((((((((((.(((.....))))).)))))))))).))))))).. (-28.60)	19	28	12.33	102	135	mmu-mir-6971
Cfb (13)	GTTGGGCTGGAGGCACAGGGCAGAACAGGTTGTCTGTGGCTCCTTACTGTACCTGTCTCCATAG .......(((((..(((((((((...(((..((.....)).)))..)))).))))))))))... (-20.70)	18	7	4	29	99	mmu-mir-6972
Ltb (1)	GGCTCTACGGTGGGAGGGGTGGAGTTGCCATTAGCCAAATCTGACCTCTGGGCACTCTAACCCTACCTACCCATCCAG ((......((((((((((.(((((.((((...((.((....))..))...))))))))).)))).))))))...)).. (-29.30)	90	51	72	7	366	mmu-mir-6973a
Bat1a (2)	AGTCGGCTGGGGAGAAAGGGGTTTGGCACGGTGCAAAAATGTCTCTCCTTTCTCCTCCTAG ........(((((((((((((...((((...........)))).))))))))))))).... (-23.70)	29.17	28	291	80	685	mmu-mir-6975
Srf (1)	TTCCCCAGGGAAGTTGAGAGGAAAATTGTCGCTGACCTGCCCATCTCCCTCCCAACTCCCCAG .......(((.(((((.((((.....((..((......)).))....)))).))))).))).. (-19.50)	144	8	5	96	1501	mmu-mir-6976
C3 (22)	AAAGGAAGGGGTGAGAGAGAAGCTGGTGCCATCCACGGCTTCACTCTCACCCTGCAG .......((((((((((.(((((((..........))))))).)))))))))).... (-30.30)	16.67	30	234	240	94	mmu-mir-6978
Diap1 (21)	GGGGAGGCGCAGAGACTGAGCTGCTCAGTGCGCGCTTGTGTCTGTCTGGCTCCCAG .(((((.((((((.((.(((((((.....))).)))))).))))..)).))))).. (-26.10)	3	4	59	46	869	mmu-mir-6979
Arap3 (6)	TTAGGGTGGGGGGGGAGGCTAGGTTAGCATCCACCCAGCTGACTTGCCTTCCACCCCAG ......(((((.(((((((.((((((((.........))))))))))))))).))))). (-33.10)	24	13	4.67	43	81	mmu-mir-6980
Camk2a (9)	GCTGGAGGATCGCAGGGGTGGCCTGGGGCAGGCTAGGCAAACCTGGCCCCTCTGCCCCTTCCAG .(((((((...(((((((.((((.((.((.......))...)).)))))))))))..))))))) (-35.80)	3	7	27	14	746	mmu-mir-6982
Csf1r (8)	ATGACTTGGAAGGGCATACTGATTCGGGAGACCCTAAAGCCTGAATCAAAGTCTGTTGTTCCAG ......(((((.((((.(((((((((((...........)))))))))..)).)))).))))). (-22.30)	23	5	33	14	119	mmu-mir-6983
Mrpl21 (5)	GTGAAACTGAAAGGCAATGAAGGAGGAGCACTGTCACAGTGTACTTTCTTTCCTGTCTTTCTAG ........((((((((..((((((((.((((((...)))))).))))))))..))))))))... (-25.30)	93	44	13	1	1228	mmu-mir-6984
Ssh3 (12)	GTGTATACTGAGGGGTGGCTGCTATGTCACTCAAAGCTGACTCACAGCCACCTCCTCACAG ........(((((((((((((....((((........))))...)))))))).)))))... (-27.30)	24	30	21	26	90	mmu-mir-6985
Rce1 (4)	GGGTGAGGGGAGCTAGGTAGAAAGCCAGAGGCATATGTGGTTTTCACCTTCCTCCCAG .......(((((..((((.((((((((..........))))))))))))..))))).. (-24.10)	559	244	0	69	116	mmu-mir-6986
Pcnxl3 (9)	AACAGTGGGACAGGGTGACAGGGTGAGACCCATAGATCAGAGCTGGGCTTCACCCATTTCTCCCTGCTTCCAG .....((((((((((.((..((((((..((((...........))))..))))))...)).))))).))))). (-32.90)	54.5	48	5	8	356	mmu-mir-6987
Map4k2 (20)	GGCTGTTGGGGACAGAGGCACAGGATGCTGGCTGCTGACCACCTGTCCACTGTCTCTGGTCCCAG ......((((..((((((((..((((..(((.......)))...))))..))))))))..)))). (-27.20)	96	60	27	169	77	mmu-mir-6989
Esrra (2)	GCTTGCCCAGGGTGAGTCAGGGCTCTCCTGTCATCTGGGCCCCCTCCGGGCTCTGGGAGGCCGCCACTGGAGCCCTGCCTCTTCCTGGCAG ...((.((((((.(((.((((((((((((.(((...((((((.....))))))))).)))........))))))))).))).)))))))). (-47.70)	105	121	5	45	5867	mmu-mir-6990
2700081O15Rik (3)	AGCAGTGGAGAACAGGGACTGGGCCTGATTGATGGCACTCGCTCCAAGGCAGCCCTTTGTTCTTCTCCAG .....((((((...(((((.(((.(((.(((..(((....))).)))..))))))...))))))))))). (-25.00)	31	62	10	24	180	mmu-mir-6991
Stx5a (3)	ATATCTGCCTGTGATGGTTTGGCTGAGTGGAATTGGTTGTGTTGGAGGTTATGGTAACAGCCTCTTTCCTGCCCTTTACCACAACCTTCTCACTGATGATCATTTGCAG ....((((..(((((.(((......(((((((..(((((((.((((((.((.((.............)))).)))))).)))))))))).))))))).)))))..)))) (-33.22)	444	16	13	7	155	mmu-mir-6992
Fads1 (5)	GGCTCAGTGGGAGAAACGGGTGTCTGTCTGGTCTCTGCTGCTGACTTGCGTTTGTTTCCTCACAG ......(((((.((((((..(((..(((.(((....)))...)))..)))..))))))))))).. (-22.10)	54	44	2	8	4556	mmu-mir-6993
Patl1 (7)	CTGTCACAAAGGTGGGTGAAGCCGGTGACGATTGCTAGTTCTTCTGTGTCAACGATCTTCTCCGTCTTTGCAG (((...(((((..(((.((((.((.(((((.....(((.....)))))))).))..)))))))..)))))))) (-19.10)	104	43	148	23	324	mmu-mir-6994
Sh3pxd2a (4)	CAGACCTGGGAGTAGAAGGGGGAAACCAGAAATGAGGGCTTTAATGATGGTGTGTCCCCTTCCTCTCACAG .....(((.(((..((((((((..((((...((..........))..))))...))))))))..))).))) (-26.20)	43	26	12	24	4794	mmu-mir-6995
Notch1 (1)	TGGGCTGCACAGGACAGAGCACAGTCAGCATCATCCGACGGTGTCTCTGGTCACTCTGCAG ....(((((.((((((((((((.(((..........))).))).))))).)).)).))))) (-22.40)	343	230	11	8	215	mmu-mir-6996
Spna2 (16)	CCAAGTAACAGGCTGGAGAGGTGCAGAACAGAGTCTCTGGAGTCTCTCAAACCTTACCCTCCTGTTTCCAG ......((((((..((.(((((...((..(((.((....)).))).))..))))).))..))))))..... (-20.60)	625.5	166.5	61	14	443	mmu-mir-6997
Fubp3 (13)	TGGGCCTGGGCAGAGGGCAAAGTGACTCGGTGACACGGGTGAGAGCTGCTCTGTGCCCACACAG ......((((((.(((((..(((.(((((......)))))....)))))))).))))))..... (-26.70)	56	12	36	31	745	mmu-mir-6998
Dgkz (1)	AAGGAAGGAGAGTCAGCAAGCACCTGGCTGGCCCAGGCTTCAGCTGTCCTCCTTTCTGTAG .(((((((((...((((.....(((((.....))))).....))))..))))))))).... (-25.60)	37	14	10	4	304	mmu-mir-6999
Mapk8ip1 (4)	AGAGGAGGGGACAGGTATCTGGACAGAGGTTCTGCCCTCAGCACCCACCTGCCTGTCCTCCAG ......(((((((((((..(((...((((......)))).....)))..))))))))).)).. (-26.90)	18	1	21	25	170	mmu-mir-7000
Cd82 (6)	GGAGGAGGCAGGGTGTGAGCGTGAGCATCCCAGAGGCCCAGGTTCAAGTCCAGCCCTGACGCTCACACTCCCTCTGCAG ...(((((..((((((((((((........(((.(((...((.......)).))))))))))))))))))))))).... (-33.70)	49	20	4	24	8016	mmu-mir-7001
Aqr (10)	TCTTTGGCTTCGGGGAGTACGTGGAAAATGAGCGCTTTGTGCTTCCCCTTGCCAG ....((((...((((((((((.((..........)).))))))))))...)))). (-21.80)	27	9	0	31	1003	mmu-mir-7002
Mybl2 (5)	TCAGGTGTGGGGAGAAGCTGCGGCAGCCGAGAGCTGCGTGTCAGAGGCCCCGGGTTTTCCCCACAG .....(((((((((((.(((.((..(((.....(((.....))).)))))))).))))))))))). (-30.50)	50	43	2.67	30.67	3655	mmu-mir-7003
Atp9a (23)	TGACCTTCCGTGGATGAGGCCTGTGCCGTGACTCTCAGTGACACCCACTCCCTCCTTCACGCAG ........((((((.((((...(((..((.((.....)).))...)))..)))).))))))... (-18.20)	16	8	12	14	3166	mmu-mir-7004
Lama5 (66)	AGGGGCCTGGGGATGGGAGGACCAGCAGAGAAATTTGGCTTTCCTGTGCCTGCTACCCATCCCTTGCAG ....((..(((((((((.((....((((.((((......)))))))).....)).))))))))).)).. (-28.80)	38.67	25	9	2	81	mmu-mir-7005
Znf512b (11)	CCATGTGGGGGTGTTCAAGACTTGGGAACCTGGCTGATTTCTTACCTGGTTTCTGACCTGGATCCCCAG .......((((.(((((....(((((((((.((.(((....))))).)))))))))..))))))))).. (-21.80)	4	1	2	83	81	mmu-mir-7006
Cpa3 (8)	CCACATCAGAAGAGGCAGTGGAGGAGATGGTACACAGCACATTCTGATCCCATCCACGTTTCTTCTGTAG ......((((((((((.((((((((((((((.....)).))))....)))..)))))))))))))))... (-24.10)	4201.5	2185	2058	418	942	mmu-mir-7007
Prkci (10)	TGCTCTGTGGGAGATGCCAGGAGCCGTACGACTAACTGACGTGTGCTTCTTGCCTCTTCTCAG ....(((.((((((.((.(((((.((((((.........))))))))))).)).))))))))) (-19.60)	51	31	8.94	80	481	mmu-mir-7008
Anxa5 (1)	CCCTTTTGGGGTCAGGGGACCAGAGCTCCAGTGACCCTGTCTCTCTTTTCCCCTCTCCCTGCAG .......((((..((((((..((((...(((.....)))...))))..))))))..)))).... (-24.10)	35.5	13	5	10	112	mmu-mir-7009
Gucy1a3 (5)	GTTTCGGAAAGGATTGGGAAACTTGACTAATGCATGGTAACAGGTTCTCCTTTCCTTTGCAGT .......((((((..((..((((((((((.....))))..))))))..))..))))))..... (-19.10)	118	11	4	6	2346	mmu-mir-7010
Sema4a (9)	GGCAGAGGAGGATGGGAGAGGGAGGTGTGCACCCACTCAGGAGCTGACACACTCTGCTTCCCTCCTCCTCTAG ...(((((((((.(((((..((((((((((.((......)).))..)))).))))..)))))))))))))).. (-37.70)	38.83	32	6	14	7112	mmu-mir-7011
Dennd4b (7)	GACGGAAGGAGAGGAGTTGGCAGGGACTAGCTATGAGCATCCTGACCTGTGGCTCCTCTCCCAG .......((((((((((((((((((....((.....)).))))).))...)))))))))))... (-27.80)	196	50	4	11	91	mmu-mir-7012
Pi4kb (8)	TTCGGTATGAAGAGGCCAGTGTTGTAGCTTGAGATCCAGCCTAAGCCACACTTACTGTTGCCTCTTCCTCAG ........(((((((((((((.(((.((((.((.......)))))).)))..)))))..))))))))..... (-24.00)	67	18	5	2	5126	mmu-mir-7013
Ecm1 (9)	AGGCTTTGGGTGCTGTGGAAGGGACAGAGACCCTGAGCTCTTCCTCTTTCATACCAACCACAG ...((.(((.((.(((((((((((.((((........))))))).)))))))).)).))).)) (-20.80)	54	37	4	0	288	mmu-mir-7014
Smap2 (7)	TGCCCTCTGTGCAGTAGGCTGTGGGTTCCATGCTGACTGACTTTCTCACTGTCCTCTGCACTAG ........((((((..(((.(((((...................))))).)))..))))))... (-19.11)	96	106	19	297	1127	mmu-mir-7015
Tmem39b (6)	CGACTCAGGGAGGGGAGCGAGAGTAGGCCACTATGGACATGCTGAGCCTGACCTGCCTCCTGCTCTCCCCAG .......(((((((.((.(((.(((((((.....)).((.((...)).)).)))))))))).)))))))... (-27.00)	56	23	13	34	2271	mmu-mir-7016
Wasf2 (8)	GTCCCAGAGGGTTGTGAGACTAGGGCTGTGCTTCCTGCCTAACCCTGCTCCTCTCCCTCCAG ......(((((....(((..(((((.((.((.....)).)).)))))...))).)))))... (-20.00)	95.25	59	2	23	809	mmu-mir-7017
Pink1 (5)	AGGGGATCTGGGAGGGGCTGTCAGGAGTACAGGCCGACTGCACCGCTCACCTTGGCCGCCTCTCTGCAG .......(((((((((((.((((.((((.(((.....)))....))))....)))).)))))))).))) (-25.70)	28.5	14	59	33	1173	mmu-mir-7019
Aldh4a1 (12)	AGGTCTGGGATGGTGGAGAGGGTGACCAGATGGAGACATCGTAGGCACTAACCCCTCTCTTCTCTCCCAG ....((((((.((.((((((((((.((.((((....))))...)))).....)))))))).)).)))))) (-34.60)	67	25	0.2	21	569	mmu-mir-7020
Prdm2 (7)	GAGTCATAGGAGTTGATTACAGAGCAAGCGCTGTGTCTTCATCTCTGTGCTTCTGCTCCTTAG ((((((((.(((.(((..(((.(((....))).)))..))).))))))).....))))..... (-18.80)	888	263	4	6	6024	mmu-mir-7021
Fbxo6 (3)	ACCTGGCAAGGAAGGGCTCTGTTTAGCATGCTGGCAATACAAGCCTGACCTCTGCCCCCAG ....(((((((..(((((.(((...((......))...))))))))..))).))))..... (-20.70)	42	7	3	9	359	mmu-mir-7022
Pik3cd (12)	TTGGAATGGGGGAGCTGGGATTGGGCGTGGAGCTTGGAGGCCTCACCCTGTCTGCGCCCCTCAG ......((((((.((..(((.((((.(((..(((....)))..))))))))))..)))))))). (-26.80)	54.5	61	20	91	77	mmu-mir-7023
Whsc2 (10)	ATGGGTTGGGGGATGGGTTGCTTGGCCCTAGGCACCTGCCCAGCAGTCCCTGCTCCCTACAG ....((.(((((..((((((((.(((...((....))))).))))).)))..))))).)).. (-26.40)	223	404	23.5	13	102	mmu-mir-7024
Pdgfra (10)	CCGTGAGCTGAAGCTGGTGGCTCCCAGTGAGTTTCTCAGTAGGCAGCACAACTCCAGCTCACCAGCCACG .((((.((((.(((((((((((.((..((((...))))...)).))).))...))))))...)))))))) (-27.20)	5	14	56	57	784	mmu-mir-7025
Ep400 (31)	TGCGTTTCTGAGACCATGGGGTATATGCAGTGGTTCTGGTAACATGTGCTTTCTGGTCTTGGCTTAG .......(((((((((..((((((((((((.....)))....)))))))))..)))))))))..... (-23.20)	100	50	8	14	465	mmu-mir-7026
Ube3b (14)	TCCCCTGGAAAGGAAGAAACAGCAGAGCAGCTGGGGTCCCTACATGAAGCTCGGGTTTCTCTCCTCTTCCAG ....((((((((((((((((....((((....((....))........))))..)))))).)))).)))))) (-25.30)	21	9	5	28	1850	mmu-mir-7027
Tchp (10)	TGGGCTGAGGCTTGGGTCAGGAGGTTTAGACTGAAATGCAAACCTTCTCTTCCCCCTCGGCCAG ..((((((((...(((..(((((((((............)))))))))...))))))))))).. (-28.70)	39.33	10	1	8	1118	mmu-mir-7028
Gcn1l1 (10)	GTAAGTCTGGACGCTCGGCTGCCAGCGCCCTGAGCTGTGGCTCTGTGTGTCCAGATCAGCT ((..((((((((((.(((..((((..((.....))..)))).))).))))))))))..)). (-29.10)	42	19	12.5	37	423	mmu-mir-7029
Rab35 (5)	TATCCTGGGGAGGTGGCTGTGCTAGTCCACGGGGTCAGCCTTGCTCTGTTATCTCTCCAG ....(((((((((((((.(((((..(((...)))..)))...))...))))))))))))) (-24.60)	25.5	18	11	74	1933	mmu-mir-7030
Sh2b3 (2)	GACAACCTGAGAGGCCTGAAGGGTGGGAGCAGCCTTGAATGACCAACCCTCTTGCCCTCTCCTAG ........(((((((..((.((((((...((........)).))).)))))..))).)))).... (-20.40)	54	65	16	19	9193	mmu-mir-7031
Hip1r (13)	CGTGGCCCAGGGTGGTCCCCGAGAGGGTGGTCCCCACATGGGCAAACCAGGGGTCCATCCTCTCGGTACCGCCCTGCAG .......(((((((((..((((((((((((.((((...(((.....))))))).)))))))))))).)))))))))... (-53.30)	21	11	44	24	87	mmu-mir-7032
Pom121 (8)	TTTAGTCTCCAGGAGTCTGAGGGGCAGGGTCGTCTCCAGCATCTTGGGCTTGGCCTAACCTGCCTCCATTCTCTTGGGCAG .......((((((((..((.((((((((((((..(((((....)))))..)))))....)))))))))..))))))))... (-35.30)	144.83	151.67	11	51	109	mmu-mir-7033
Tmem120a (11)	GTCCGGGAGGGATGGATGTGCTGGAGGTCCCATCTAGACCTTGACTGTCCTGACCTTGGCCTTCCTTCCCTACCCTACAG ....((((((((.(((...(((.((((((.((((........)).))....)))))))))..))).))))).)))..... (-27.70)	55	23	10	2	91	mmu-mir-7034
Rasa4 (17)	TGAGGGGCTGGGAGAGTGGCTCAGAAGAGAGTACCTGGCTCTGGGGAGGAAGGGGCAGACTTCTGAGCCGCTGTCCCTGCAG ......((.((((.(((((((((((((...((.(((..(((....)))..))).))...))))))))))))).)))).)).. (-45.70)	13	6	37	32	950	mmu-mir-7035
Srrt (5)	CTTCCAGCGGGGTTCGGTGGGGAAGAGACTGCAGCATGCTGTCCGTCCTCATCCGCTCCTCCCAG ........((((..(((((((((...(((.((.....)).)))..)))))).)))..)))).... (-25.10)	56	40	5	36	151	mmu-mir-7036
Ints1 (7)	TCGGGAAGGTGGCCACAGGAGATCATGGTGGCTCCTTACCACCTGTCTCCTAATGTCACCTGCAG ......(((((((...((((((.((.(((((.......)))))))))))))...))))))).... (-28.70)	35	11	3	3	540	mmu-mir-7037
Eif3b (5)	TGCGGTGTAGAAGGAAGGGCTGCTGTGCTTGACAAGTCTGTCATTTTCACACTGCTCCTGCCTTCTTACAG ....(((.((((((.(((((...((((..(((((....)))))....))))..)).))).))))))))).. (-25.20)	127.5	155.5	4.5	10	264	mmu-mir-7038
Smurf1 (6)	TCGTTAGAGGGATGGAGAGCATCGCGTGTTTGAGTCTTGTGACACTTCCATAATGTTTCCACGCCTGTTCTGCCCTCCCTTCCAG ......((((((.((((((((..(((((...(((..(((((.......)))))..))).))))).)))))).)).)))))).... (-28.70)	94.83	19.5	1	2	1251	mmu-mir-7039
Loxl3 (9)	TCTCCCATACGGAGGGAGATGGAGGCGCCCTCAGTGGTAACCGCCACCCTCTCTCTCACGTAG .......((((((((((((.((.((((.((.....))....)))).)).)))))))).)))). (-28.30)	41	34	0	7	127	mmu-mir-7040
Lrig1 (17)	CTCTGAGAGGGAATGGAGACTCAGTTGACCTCTGGTTCTCTTCTTCCCTCAG ......(((((((.(((((..(((.......)))..)))))..))))))).. (-21.80)	47	15	5.25	50	928	mmu-mir-7041
Tatdn2 (4)	AGAATTAGAGACAGCAGAAGGGCCACTAATTAGCTGTTGTCCCTTTGTTTTCTCTCAG ......(((((.((((((.((((.((.........)).)))).)))))).)))))... (-17.10)	142.5	253.5	11	31	2359	mmu-mir-7042
Rassf4 (4)	CTGCCTGTGAAAGCAGAGAGGCATTTTTCTCTGTCGCAGCTACTTGAGTACTGTGCCTCTCTGTTTTCAG .......(((((((((((((((((....(((..............)))....))))))))))))))))). (-31.34)	24	5	82	172	1589	mmu-mir-7043
Rasgef1a (4)	CTCTTGTGTGGTGGTGGTGGCGGCCTCACTGTCAATCCACTGCAGTACCTGATGCAGCCCCGACCCTCACAG ......(((((.(((((.(((.((.((((((.((......))))))....)).)).))))).))).))))). (-24.00)	1	2	36	209	705	mmu-mir-7044
Chd4 (1)	GAAAGAGCGGGTGGGGGAGGGGGACTGCGCGTCACTCACTGTTCTCCCCCCTCCCCCGCACAG ..........(((((((((((((...(((.((.....)))))....))))))))))))).... (-32.70)	3	7	27	14	826	mmu-mir-7045
Pra1 (3)	GTCTGTGTAGGGTGAGGCTGGGAGCCAGGCGAAAGAGCACAGCCTGAACCACCCATCCCCCTACAG .....(((((((.((((.(((....(((((...........)))))..))).)).)).))))))). (-27.20)	81	16	38	130	77	mmu-mir-7046
Atp1a3 (15)	TGGTCTGAGGGAGGAGGGCTGGGTCTGAAGAGTTGGTTCTCACCCTCACCCTTCCTCCTTCCAG ......((((((((((((.((((..((.((((....))))))..)))).))))))))))))... (-30.00)	34.5	17.83	190.5	49	374	mmu-mir-7047
Dedd2 (2)	GGATGCGGGGCTGAGAGGTGAGGAAGCCGAGATAGCTTCTTCCATTCTCTTTCCCCAG ......((((..((((((.((((((((.......))))))))...)))))).)))).. (-25.50)	27	6	63	32	1133	mmu-mir-7048
Pak4 (7)	GTGTGTCTGAAGGCAGTCAGGTAGGCGGCACCTCTGACCTGCAGCCCCTGTCTGCCTCAG ......(((.((((((.((((..(((.(((.........))).))))))).))))))))) (-26.90)	162	90	0	6	1613	mmu-mir-7049
Fxyd5 (2)	AGAAGACAGGAGAAGGGGGTGAGAGACTCCCTCCTGAACTCTCAGCCTTTATCTCCCCAG ........((((((((((.((((((..((......)).)))))).))))).))))).... (-21.70)	30	15	0	8	1139	mmu-mir-7050
Etfb (5)	ACTACTCACCAGGAGGAAGTTGGGTCAGGTAAGGGCTTCGCAGCCCCCCTGAGCCACTGATTCCTGTGTGCAG ....(((((((((((..((.(((.(((((...(((((....))))).))))).)))))..)))))).))).)) (-35.70)	49	32	33	20	932	mmu-mir-7051
Josd2 (2)	TATCATGTGGGAAGGTGGAGGCCTTTCCAGGATTTCAAACCTTGGCTCTGCCCCCTCCTTCCCAG .......((((((((.((.(((....(((((.........)))))....))).)).)))))))). (-28.80)	55	40	9	150	1442	mmu-mir-7052
Pold1 (15)	GGAGCTGGGGAAAGGCAGGCTACTGGGGAGCTGGGTAGTTCGGAAGCCCAGCCTCCTGTGTCTCCTTCCCCAG ....((((((.((((.((((.((.((((.(((((((.........))))))))))).)))))))))))))))) (-41.20)	29	23	7	40	221	mmu-mir-7053
Scaf1 (4)	GGAACTAGGAAGGTGGTTGGGCTGAGTACTCACAGAACAGAGTCCAACTTGGCCCCTTCCAG .......((((((.(((..((.((...((((........)))).)).))..))))))))).. (-24.40)	149	33	8	123	272	mmu-mir-7054
Slc17a7 (10)	TCAGTGGGTTATCTGAGTTGGGACTTGCTATGATGTTTGCTACTTTGATACCCCACCAG ...(((((.((((.((((..((((..........))))...)))).)))).)))))... (-16.60)	16	13	16	21	359	mmu-mir-7055
Ptpn5 (8)	TGTGGAGGAGGACAGAGAGGTTGGGCCCAACTCACAGCCTCACCTGTCTCCCACCACAG (((((.((..(((((.(((((((((......)).)))))))..)))))..)).))))). (-29.90)	67.33	163	5.5	10	2875	mmu-mir-7056
Lrrk1 (1)	GCCTGCAGGAGAGGACTCAAGTTGGAAAACGTTCTAATTTGATGTCTTTCTCCACCAG ..(((..((((((((((((((((((((....))))))))))).))))).))))..))) (-24.20)	33	60	7	2	6553	mmu-mir-7057
Lat (7)	GTGAGTGGGTAGAGGGGAGGTGACCGTGGAAGTTGTGTGCCCTTTATCAACTTCTCGTTCCTTCCTTTCTTCCAG .....((((.((((((((((.((.((.((((((((............)))))))))).)))))))))))))))). (-29.40)	412	140	14	13	75	mmu-mir-7058
Cln3 (6)	AAACCACCGGGGACTGCGGCTTTCAGTTAAAGGTCACTGTTTGCTGTTTGTCCTCCCAG ........((((((.(((((...((((........))))...)))))..)))))).... (-20.30)	1125	202	1	11	670	mmu-mir-7059
Plekha1 (10)	GAATTTATGGAAATAGGAGGTGATTTTGAGAGAAAGTTGACTGAAATATCCCTTTTATTTCCTTTTAG ........((((((((((((.((((((.((..........)).))).)))))))))))))))...... (-17.90)	76	8	12	8	2881	mmu-mir-7061
Adam8 (14)	TAGGATGGAGGCCAGCTTGTGGAGTGTCTATGACCTAAACCAGACTAACTTCTCCTGGCCCCACAG .....(((.((((((.....(((((((((............))))..)))))..)))))))))... (-20.50)	56	9	3	3	84	mmu-mir-7062
Ap2a2 (12)	TCCCCATGAGAGGTGCAGGCTGAGCACAAGGCAGCACATGGGACAGATGAGATAGTGTGACTCCCCATTTGTGCTCTCTGCCCCTCTTAAG ......(((((((.(((((..((((((((((.(((((((...............))))).)).))...))))))))))))).))))))).. (-35.16)	134	159	5	74	222	mmu-mir-7063
Cars (11)	GAGGTTCAGAGGCATAAAGGTCATTTGCTTCAGTAGTAAAGGCCTGGGCAGGTTTGGAATGGTCAGCAGGGCCCTTTATGTCTCTCTAG .......(((((((((((((...(((((((((.......((((((....))))))....)))..))))))..))))))))))))).... (-30.10)	71	6	11	3	813	mmu-mir-7064
Cul4a (12)	CATGGAGTGTAGCAGGTAAACCAGGAATCTCTCTCAGGTCTTGGTTTTCCTGTTTGCACAG ......((((((((((.((((((((.((((.....)))))))))))).)))))).)))).. (-25.60)	12.5	5	4.83	117.5	163	mmu-mir-7065
Ncan (9)	CCCTGTGGGTTGGGAAATGAGTAGAGGCTGACCTCTGACCTCTACCCATTGCCTGCCTCCCAG ..(((.(((..(((.((((.(((((((...........))))))).)))).)))..))).))) (-23.20)	161.33	53	24	19	1420	mmu-mir-7066
Gm15427 (4)	AGGGCTGCAGGGGGTGGTTGCACACGGACAGTCTCTGGACACTGATTGCTTCCCTCCCCACAG ....(((..(((((.((..(((..(((...(((....))).)))..)))..)))))))..))) (-20.50)	16	10	17	119	92	mmu-mir-7067
Farsa (10)	AGTGTTTGGGGGCCTGGGAGGGTGACACTGAGGTCATCAGCCTGCCCTGCCAACCCCTACAG ......((((((..(((.((((((...((((.....))))..)))))).))).))))))... (-27.10)	92	38.5	23	26	90	mmu-mir-7069
Heatr3 (1)	GCCCGGGAGCGAGGTGCTGCAGCGCGCGTGCTCACTACGCGACTCTGACGTCTCGGTTCCCGCAG ...(((((((((((((...(((..((((((.....))))))...))).))))))).))))))... (-27.30)	15	8	29	42	117	mmu-mir-7071
Nlrc5 (23)	AATGGGAGGGGAGACAAGAGGCAAGGCACCCTACTGAGCCTAGCTTCTCTTCTTCCCCAG ..((((..((((((...(((((.((((..........)))).)))))))))))..)))). (-27.20)	83	95	3	21	641	mmu-mir-7072
Cnot1 (13)	CTTTCTGGGGGAATTGAAAGACTATGACTTAACAATTAACTGATAGCCTTTTCCTCCCCAACAG .......(((((...(((((.((((.................)))).)))))..)))))..... (-13.23)	553.4	30	6	10	1829	mmu-mir-7073
Slc12a4 (7)	TTGGGTGGGAAGAGGCTAGGGCTCCAGTCCAGCAGGTAACTAGGCCTTCTCCTCTCCCTGCAG ....(((((.(((((..((((((..(((((....))..))).))))))..))))).))))).. (-25.00)	8	3	24	27	143	mmu-mir-7074
Terf2 (1)	GGCCGCGGGGAGGAGGACATGGTTTTGGGGGGCATGACTTGGGGTCCGGGGCTCGCGGAGCCAACCATGTCTTCTTTCCCAG ......(((((((((((((((((......((((..........))))..(((((...))))).))))))))))))))))).. (-40.70)	28	14	39	375	97	mmu-mir-7075
Ctrb1 (1)	TCCAGGGGAGGTGGTATGGTCTCAGCGGGGTCCGGGTTGGCTGTGACAACATGACTACCACTGTCTCCCCAG ....(((((((..((.(((((....((.((((......)))).)).......)))))..))..))))))).. (-28.60)	17	16	3	20	1340	mmu-mir-7076
4933407C03Rik (15)	TAGGCCAAGGTCCCATGGCAGGCTATTCCCTGACACACCTTCCATGGCTCCTGGCAG ...(((.(((..((((((.(((...............))).))))))..)))))).. (-22.26)	14	3	7.5	27	803	mmu-mir-7077
4933407C03Rik (20)	CAGGGTGTGGGTGGTAGGAGACGCTGGCTGGTATTTGACCAGGTACTTTTTTTATCATCCACAG .....((((((((((((((((...((.(((((.....))))).))..)))))))))))))))). (-26.70)	91	54	4	8	2371	mmu-mir-7078
Rpl13 (5)	CCCGGAGGGCTGAGGCAGTGAGTCCTGTGCACAGGTCCTGTAGGCTCCTGACTTCTGTTCTCTTTCCAG ...(((((((.(((((((.(((.(((....((((...))))))))))))).)))).)))))))...... (-24.60)	78	24	32	182.33	1089	mmu-mir-7079
Dnmt1 (28)	ATTTCAGAGGAGGGTGCTCGGCCGGGGATTATAAATCTGTGGTAAAGTAGTATTCCCCTGGTATCCTCCTCACAG ......((((((((((((.....(((((.(((....((.......))..))).))))).)))))))))))).... (-29.70)	6	1	55	50	1632	mmu-mir-7081
Dock6 (19)	GAGGGTCGGGGCTGGACAAGCAGAGACATGTGCTCATCCCTCTGCTCTCCTGGACCCCAG ..(((((.(((..(((...((((((..(((....)))..)))))))))))).)))))... (-25.50)	1344	109	5	16	1833	mmu-mir-7083
Elof1 (1)	GCTTCTAGAGGATAGAGGTAGAGAGTGGCCAGCTGCTGCCAGCCTCTGACCCCTGTCCTCTGCACCACAG .....((((((((((.(((((((..((((........))))..))))).)).))))))))))........ (-30.10)	704	246	4	1	3166	mmu-mir-7084
Slc37a4 (4)	TGGTGCAGTGGGGGCAGGCCAGCAGGAGCAGAGCCCAAGTCCTAGCTGGCCTCTCCCCACCTTCAG .......(((((((.((((((((((((............)))).)))))))).)))))))...... (-34.30)	34	24	20	24	450	mmu-mir-7085
Il10ra (1)	CTCTTAAGAGGAGAAAGGTTTGGGCACAAGCTGTTCCCTCAGTGTCCGTTCTGATATCTCCTCAG .......(((((((..((..(((((((..............)))))))..))....))))))).. (-23.04)	230	214	1	6	2363	mmu-mir-7086
Sidt2 (24)	GTTGGAGGCAGGTGTGGAGCTGGTCTCTGCAGAGCAGACTCAGTAGGCTGCTGGCTCTCTCCCCTGCCAG ......((((((...(((((..((.(((((.(((....))).)))))..))..)))))....)))))).. (-31.70)	112.9	78.5	6	13	1780	mmu-mir-7087
Cdc25a (11)	CTGGGCCGTGGGACCTACAGACTCCTGGGTGTGGCTTAGCAGGTGCTCAGTGTCTGCTGTCTCCACAG .......(((((((...(((((..(((((((..((...))...))))))).)))))..))).)))).. (-24.30)	22	5	7	54	580	mmu-mir-7089
Ctnnb1 (7)	AGTTCTCAGAGTTGGGACACCATGAGGGCTAACAGGCCTGCCTTTGATGTCTGACTTTGCAG ....(((((((((.(((((.((...(((((....))))).....)).)))))))))))).)) (-19.00)	16	5	11	35	2144	mmu-mir-7090
Fam50a (4)	GTCTAAAGGCAAACTCACAGAATCATTTTCTGAAAAAATAAAATGTTCTTTGTTTTGTTTGCCTTAG .....(((((((((.((.((((.((((((..........)))))))))).))....))))))))).. (-18.00)	99.5	1	51.5	34	1857	mmu-mir-7092
Armcx3 (2)	GTGGGCAGGATGACAGAAGGAAAACCTATCAGATAGTTTGTTCATAATCCTTCTCTCTCAACAGCACTTAGTGTCCATGTTTTCCATCTGTCATCCTGCAG ....(((((((((((((.(((((((....((...((((((((.................))))).)))...)).....))))))).))))))))))))).. (-36.73)	32	4	83	122	389	mmu-mir-7093
abParts (184)	TCTGAAGAGGATACAGGGTCTGAAGTGACAATGACATCTACTCTGCTGTTCTCTCCACAG ..((.((((((((((((((..((.((.......)).)).)))))).)))))))).))... (-17.50)	51.6	5	5	9.5	589	mmu-mir-7094a
abParts (173)	TCTGGAGAGGATACAGGGTCTGAAGTGACAATGACATCTACTCTGCTGTTCTCTCCACAG ..(((((((((((((((((..((.((.......)).)).)))))).)))))))))))... (-24.30)	391.5	156	5	9.5	9803	mmu-mir-7094b
Arrb2 (9)	GTCGGGGGTTGTGGTGCCGAATTGTCTGTGTCACCCAAAGCCACTTGGTCCCCTGCCCCCACAG ((.((((((...((..((((..((.((.((.....)).)).)).))))..))..)))))))).. (-22.70)	96	21	14	2	290	mmu-mir-7115
Acly (1)	AACAGTGAAGACATCAGGAAAAAAAAAATAAGAAATGATAAACCTTTTTTTTTTTCCTTTGCCTTCTCAG ......((((.((..(((((((((((((.................))))))))))))).)).)))).... (-15.03)	9	1	66.67	33.5	773	mmu-mir-7116
Ank (7)	TGTGATCTGGGGGCTCAGCTGAGGATAAGCCCGCCTTGTCACCGCTGTCCTTCTCTTTCCCCCAG ......(((((((...((..((((((.(((.............)))))))))..))..))))))) (-22.32)	68	24	10	63	3951	mmu-mir-7117
Plxnb2 (10)	GGGTCTGGGGAAGGCGGGAGAGGGAACAGAACAACAGCTAACTCTACGTCCTCCTCCACAG .....((((((.((((..((((...................)))).)))).))).)))... (-16.61)	20	7	42	12	75	mmu-mir-7118
Clspn (2)	AAGGACTGGGGGATTGGGTGCCTTCTTTTTAAAAAAAGAAAAAACACCGTTTCCTCCAG .....((((((((...((((..(((((((....)))))))....))))...)))))))) (-22.00)	19	13	9	65	602	mmu-mir-7119

## Sheet: Mouse mirtron
Gene (Intron)	Fold; ΔG (kcal/mol)	5p reads		3p reads		Intron length	miRBase ID	Failed Criteria
		Perfect	Tailed	Perfect	Tailed
Known Mouse mirtron
Vwa5b2 (1)	GTGAGGACTGGGGAGGTGGAGGGTAGCATCATTAGAGCCAGAGCTCTGTCTCAGCTCCCTCTCCCCCCACCTCTTCTCTCCTCAG .((((((..((((((((((((((.(((.....((((((....)))))).....)))))))......))))))))))..)))))). (-43.20)	12138.3	8958.33	26.5	994.75	85	mmu-mir-1224
Mosc2 (5)	GTAAAGGCTGGGCTTAGACGTGGCCTTTGGGTGTGGAATGCACTTCCGTTTGTAACCGCCATCTAACCCTGGCCTTTGACAG .(((((((..((.(((((.((((....((((.(((.....))).)))).......))))..))))).))..))))))).... (-30.50)	124047	40272	2453.33	1560.5	82	mmu-mir-1981
Arhgef17 (8)	GGCTGGGTGGTGCAGGCAGGAGAGCCATTGATCTATTGTGGGCTCTACTCCCTGCCCCAGCCAGAGCACCCCATTGGCTACCCACAG (((((((....(((((.((.((((((..............)))))).)).))))))))))))..(((.........)))........ (-35.34)	1363.43	1119.29	5572.67	4742	104	mmu-mir-3102
Dbn1 (9)	GTGAGAGCGGGGGGAGTGGCAAGTGAGACGGATGGGCGGGGCTGGCTCAGACTGCTAGCCCCGCCCAGCTCTCTAACTCTTCCCTTGTGCCCTCAG .((((.((((((((((.((..((.(((.....((((((((((((((.......)))))))))))))).))).))..))))))))))))...)))). (-57.60)	16	16	472	1408	96	mmu-mir-6944
Fam116b (13)	GTGGGAGAAGAGGCTGCTGTGGGTGCCCCCAAGTCCGCTAGCTCAGCTCCTCAGCTGCCTCTTGCCATCACAG (((((..(((((((.((((.(((.((.....(((......)))..))))).)))).))))))).))..))).. (-28.10)	56	22	108.5	147.25	73	mmu-mir-6958
Plod3 (13)	GTGAGTGGGGTGGTTGGCATGGGTTGCCCATGGGGACTCGACGCTGTGCCCACAGCCTCCTGATGTCCTCCTCACGCATGCCCACCCTTTACCCCGCTCCAG ..(((((((((((..((..((((((((....((((((((((.(((((....))))).))..)).)))).))....))).)))))))..)))))))))))... (-49.00)	399	388	841	2055.5	102	mmu-mir-702
Fbxw9 (2)	GTGAGGGGAGCTGAGGCAGGAGGCCAAGCAGGCTAGGAGGTGAGGAACCTCAAGGATAACTAACTCCAGGCTCTCCTTCCCTCCAG ..((((((((..(((((.(((((((.....)))...(((((.....)))))............))))..)).)))))))))))... (-34.80)	152	207	32.5	638	86	mmu-mir-7070
Cpne7 (12)	GTAGGAGCTGGAGGTGGGTTTGGCATAGCGCTGCATCGGGCCAGGCTCACCCCTCCGTTCCCTACAG ((((((((.(((((((((((((((...((...)).....))))))))))))..)))))))).))).. (-32.40)	1798.67	889.17	512	123	67	mmu-mir-7080
Abcf1 (12)	GTAGAGGAGATGGCGCAGGGGACACAAGGTAGGCCTTGCGGGTCTGTGGACCCTTGGACATGTGTCCTCTTCTCCCTCCTCCCAG ...((((((..((...((((((((((.((....))....(((((....))))).......))))))))))...)))))))).... (-37.10)	15653	11552	1032.07	2265.17	85	mmu-mir-877
Novel Mouse mirtron
Baiap3 (23)	GTGGGAAGAGGGGTGGGGCCCGGGACTGTACCCATGTGAGGACTATTCTTGAGTCCTGCTCTTGTTCTGAGCACCACCCCTCTCTCAG .((((.((((((((((.((.((((((.........((.((((((.......))))))))....)))))).)).)))))))))))))). (-42.72)	13.5	4	1099	3670.5	88	mmu-mir-3547
Myh3 (35)	GTGAGGGCAGGAGGATTGGGGTGTGAGGGTCCACCCCAGACGCACTGTATGACACTCCCTCCTCCTCCCCAG ....(((.(((((((..(((((((..(((....)))(((.....)))....))))))).))))))).))).. (-32.80)	92.25	36	18.83	66.83	72	mmu-mir-6923
Mllt6 (15)	GTGAGGGGATCCAGCCCAGGCTAGGGGGAAGAATCCCTGCCCGTGGCCTGAGCTGGCTCCCCTGCAGCTCCCGTCTCTTCTCGGTCAG ((.((((((.(((((.(((((((.(((..((.....)).))).))))))).))))).)))))))).....(((........))).... (-45.80)	26	51.5	17.33	30	88	mmu-mir-6927
Skiv2l (14)	GTAAGTTCAGGGCTGGGAGCAGAGACTGGGCCTGTGCGAGGTCTCACGCCACCCACCCTGTGCTCAG ...(((.(((((.((((.((.((((((..((....))..))))))..))..))))))))).)))... (-29.50)	257.33	90	62.5	29	67	mmu-mir-6970
Gfra4 (3)	GTAGGTATGGGGAGAGGACAGGGAGTTGACAGTTTCCGAATCCTTCCCATCTGTGCTCTCTTACCCTTCCTAG .((((...((((((((.(((((((.(((........))).))).......)))).)))))...)))..)))). (-24.11)	22	9	1	26	73	mmu-mir-6973b
Lta (2)	GTGAGGCAGCAAGAGATTGGGGGTGCTGGGGTGGCCTAGCTAACTCAGAGTCCTAGAGTCCTCTCCACTCTCTTCTGTCCCAG .((.(((((.((((((.((((((.((((((....))))))..((((((....)).))))..)))))).))))))))))).)). (-35.20)	164	91	14	56	83	mmu-mir-6974
Arap3 (29)	GTGAGGAGAAGGAAGAGGCTGAAGGCTGGGCTTCTGGTGCTTCTGGGGTTCAGCCACACACCCACCCCCAGTGCCACCCAGGCCGACCAGTGCCAACAGCCTACTGTCTCCTCAG .((((((((....((((((((..(((..(((((..((((...((((((.................))))))...)))).))))).......)))..)))))).)).)))))))). (-51.23)	82.11	43	1	19	115	mmu-mir-6981
Hspg2 (43)	GTGAGCAGACAGGGAGTGGTGGGGGAAGTCTTCTCCTGGGCTCCCTGAGCCCACACGTAACCCTCACCCTGCTGCCGGCTTGCAG ((((((.....((.(((((((((((.((....))..(((((((...))))))).......))))))))..))).)).)))))).. (-37.90)	21	4	458	93.5	85	mmu-mir-7018
Fbrs (7)	GTGAGTGCTGGGTAGAATGGGAAATGAGGGATGGAAGCTGCAACCGAGGGGCTATAGGCTCAAGCTGGGCTTGTGATGCTCTCTGTAGAGCATCCTCCTCTCGGCCCCTGTCACTTTCTACTCTACCTTCTACTCAG .((((((..(((((((.((((((.(((.((..((.........((((((((..((((((((.....))))))))((((((((....))))))))..)))))))))).)).))).)))))).)))))))..)))))). (-60.60)	94	19	6	33	137	mmu-mir-7060
Cherp (4)	GTGAGGCTCAGTATGGGGTGGGGGTGTCGTCGCCTGCCCGACTGACCACCCACTCACCCTGGACTGACTCTCAG .((((..(((((.(((((((.(((((((((((......)))).))).))))...))))))).)))))..)))). (-37.80)	101	80.5	31	134	74	mmu-mir-7068
Raver1 (12)	GTACGGGCAGGAGGAGGGGAGGCACAGGGCTGGGCAACCCTGGCTCTGGGAGGCCACTGACCTGGCCCCCCTTGCTGTCTGTCTCCAG ..((((((((...((((((.(((.((((....(((..(((.......)))..))).....))))))))))))).))))))))...... (-45.50)	15	15	55	21	88	mmu-mir-7082
Mst1 (3)	GCAAGTGGTGGTGAGGAGGGGAAACAGGCTGAGTAACAGGGGCCACGAGGCCTCAGGCCCTGTTGACCTTCCTCCATTGCTTCCAG ..(((..((((..(((((((..((((((((........((((((....)))))).)))).))))..)))))))))))..))).... (-41.80)	8	7	46	32	86	mmu-mir-7088
Dnase1l1 (6)	GTAGGGGTGATAGATTCCATGGCAGAGGGGATGGTGCAAATGCCTTTTAGCAAGACGCAGTGGCTTCTGTCGTCTCTAG .(((((..((((((..((((.((((((((.((.......)).)))))).))........))))..))))))..))))). (-28.50)	427	210	57	158	79	mmu-mir-7091

## Sheet: Mouse 3p tailed candidate
Gene (Intron)	Fold; ΔG (kcal/mol)	5p reads		3p reads		Intron length
		Perfect	Tailed	Perfect	Tailed
Mouse 3p tailed mirtron candidate
Chd5 (16)	GTAGGAGGCACCGGCCGTGGGGCTTATCCCGCTGGGCATGGCCACGGCTCTGTGCCTCCTCACACCC (((((((((((.((((((((.(((((......)))))....))))))))..))))))))).)).... (-37.80)	16	12	5	0	85
Nol6 (7)	GTGAGTTGTGGGTGGCCTGGTTTCCTCGCCTCTTTGTGGGAAGGGTTGCTCCTGAGCTCAGTCCAG .((((((..(((..((((...((((.(((......)))))))))))..)))...))))))...... (-23.80)	10	7.5	7	2	83
Plcb3 (15)	GTGAGTGGGGATGGGTGACTGGGAGCTGGCCCTGCCAGGCCTTGGCTGCTCTTACATCCCTCCTCCTCCCCCAG ..(((.(((((.(((((...(((((((((((......))))..)))).)))...))))).))))))))...... (-32.10)	180	111	23.67	37	74
Plxnb2 (31)	GTGAGTGATGTGGAGGAGGGGCTGGGGAATCCCTAAGAGACCCCAGGGTCCAGCAACCCCCTCTTTCCCATGCACTCACCTCCTCC ((((((((((.((((((((((.(((((...)))))...((((....)))).......)))))))))).))).)))))))....... (-41.70)	22	19	7	8	117
Skiv2l (27)	ATGGTAAGTGCCGGGTTTGGCAGTTGGCTGGTTGGGAGAAGCCATGCAAGACCTGGCACATTTAGTCTTC .......(((((((((((.(((..(((((..........)))))))).)))))))))))........... (-30.20)	4	1	25	5	85
Usp19 (17)	GCTGGAGAAAGGTCGCACCACATGCCATATGTGTGTCCTTTCTCCCCAG ...(((((((((.(((((............))))).))))))))).... (-21.20)	22	6	1	14	728

## Sheet: Mouse 5p tailed candidate
Gene (Intron)	Fold; ΔG (kcal/mol)	5p reads		3p reads		Intron length
		Perfect	Tailed	Perfect	Tailed
Mouse 5p tailed mirtron candidate
1700037H04Rik (4)	CTGGGGACAGTATGGAGGAGCTGTAGGAGATACTGATTGCCTATCCATCCCTGTCCTCCAACAG .(((((((((.(((((...((..(((......)))...))...)))))..)))))).))).... (-24.00)	40	15	1	7	872
2310067B10Rik (3)	CAGGCCTGGGGCATGAGAGGTAGATGGGAGCTGGCTGGGATACTCACTGCCTGCCTGCCCTACTCTAG ..((..(((((((....((((((.((((..((.....))...))))))))))...)))))))..)).. (-22.80)	20	8	3	0	255
2400001E08Rik (3)	GAGGCTGGCCTGGGCAGGACAGGGCAAGCTTTGGCCTAATTGTCCTTCCCTGTCTCCTCCCTCTTGGCCAG ....((((((.(((..((((((((.(((....(((......))))))))))))))...)))....)))))) (-31.00)	38.5	37	7	8	313
2410022L05Rik (2)	AACCATATGAGCAGACCTCCAGTTTATCATTTTTAAAAACTGTCTGTCTGTTCATAG .....(((((((((((...((((((...........))))))...))))))))))). (-19.50)	89	12	9	57	1878
9030624J02Rik (11)	TTTATCATGGAAGTGAGGACAGGGAGAATGTAACTAACTCTGCACTCCTCTCTCCCACAG ............(((.(((.((((((..((((........)))))))).)).)))))).. (-16.30)	24.5	9	1	3	1244
Abca7 (4)	GGGGGTTGGGGAGGAGGCTGAGCTGCAGGCTGAGCTTGGCTGCCTGTTGGCATCCCCTCCCCTCAG (((((..(((((...(((..((((........))))..)))(((....))).)))))..))))).. (-36.10)	33.5	49	4	8	94
Acaa1a (10)	ATTGATCGGAGCAGCTCAGAGCAGATGGCGGCTTCAGCTGCTGCTCTGGTTCCTTCCAG .......((((.(((.((((((....((((((....))))))))))))))).))))... (-24.00)	144	72.5	0	2	82
Acaa1b (10)	ATTGATCGGAGCAGCTCAGAGCAGATGGCGGCTTCAGCTGCTGCTCTGGCTCCTTCCAG .......((((.(((.((((((....((((((....))))))))))))))).))))... (-26.40)	144	72.5	0	3	82
Acad8 (4)	GAGGGAAGGCAAGGGCTGAGGCTAGCAACTGTCATTCAGGCTCAGCTGAAGTCTTGACTCTTGCTCTCCAG ...(((..(((((((..(((((((((....(((.....)))...)))..))))))..)))))))..))).. (-29.10)	10	5	12	16	93
Acadvl (7)	CCTGGGGATGAGGGGGTGCAACTCTGGTGGTCAGGATCCCCAGTGAGCCCGTTCTCTCCCCCACAG ...(((((.(((.((((.((...((((.((.......)))))))).)))).)))..)))))..... (-26.90)	16.5	3	2	12	132
Adprhl2 (5)	GCTGGGAGTGCCAGCTCTTGGCAGGAAGCAAGGTCAAGTTCCTGTGCCCTGGCTTTCCCACAG ..((((((.(((((......(((((.(((........))))))))...))))).))))))... (-24.60)	5	1	7	31	437
Adrbk1 (11)	TAGGGGGTGGACCTAGGGCTGGACCTGGGCAGGAAGCTGAGTCTTACCTGGGGGCTACCCCTCAG ..((((((((.((((((...(((.((.(((.....))).)))))..))))))..))))))))... (-34.20)	12	18	3	15	78
AK145379 (3)	CCATGTGGGTGGGAGAGGGTGGGATGCCAAGGACAGGGGTCTCATTCTCTCCCACCCATAG ...((((((((((((((((((((((.((.......)).)))))))))))))))))))))). (-44.40)	25	24	9	62	78
Akt1 (12)	TGCCCAGAGAGGATGGAGGGATTGGAACCCAGTAGTAACCAGGCCTTCTGTTGCTCCTCAG ......((((((((((((((.((((.((......))..)))).))))))))).))).)).. (-17.20)	61.5	40.5	1.5	2	1272
Aldh3b1 (2)	GGACCTACAGGAAGGAAGTGATACCGGCCCAATTCGGCCCTGACTCTCATTCCTTTCTGTAG ....(((((((((((((..((....((((......)))).....))...))))))))))))) (-25.60)	15	3	63.33	4	1931
Aldoa (3)	TTGGGCTGGGTAGAGGAGACAGGGGCCATAAAGCTGACTGCTGGTCTCCTCCCTGGCAG ....((..((..((((((((((.((.((......)).)).))).)))))))))..)).. (-26.80)	72.5	25.5	2	17	428
Anxa11 (10)	CTGAGCCTGGGACCTGGAGGATGCTTGCTGGACACATGCATCTTCCTTCTCCTCCAG ......(((((....(((((((((.((.......)).)))))))))......))))) (-19.40)	20.67	20.33	0	9	1676
Apaf1 (24)	CAGGGCAGGCCTTAGAGATGTTTAGAGTGTATTGACATTCCTAAACAAACCTAATTGCCTTCCAG ..(((.((((.((((...((((((((((((....)))))).))))))...))))..))))))).. (-21.00)	16	1	2	8	2314
Arhgap23 (13)	TCCCTTTAGGGGATGTGGAGCCGGGATTGGAGAGATTGTCACAACCTGATCCCGTTTCCTTCCTCCTGTCCCCTAG ......(((((((((.((((.(((((((((...............)))))))))........))))))))))))). (-28.16)	49	40	2	7	235
Arhgdia (5)	GAGCCATTGGGCCTGGGAGGGGCGTGCAGCACCAGTAATCCTGCCTCTCCTGTCCCTCAG (((.....((((..(((((((((((((.......)))....))))))))))))))))).. (-22.30)	23	14	2	1	85
Arhgef2 (4)	GTGTGTGGCAGGGCAGTCTTTGGGTGACAGCTGTTTGTGGTGTCTCTCTTCTGCTCTGTGTCACAG .((((..(((((((((.....(((.((((.((......)))))).)))..)))))))))..)))). (-27.40)	5	1	39.11	18	297
Atg2a (13)	GTGACTCTGGGGGAGCAATGGTGAGGAACAGGGAAGAGGCAGCTATGAGGCCCTGTCCTTTCTGTCCCCTCCAG ......(((((((..((.....((((.((((((......((....))...))))))))))..))..))).)))) (-27.60)	25	7	3	30	145
Atp1a2 (14)	GGGCGGGGAAGGGCAGCAAGACCGGCATGAGCATAGATGCTGTCTCTGCTCCTACCCTCCAG .((.((((.(((((((..(((.((((((........))))))))))))).))).)))))).. (-27.60)	1	3	59	129	482
Atxn2l (14)	TCATTCTCCAGTAGAGAAGTGGCATGAGCGAGCTTGTGCTTTGTCTGCATAGCAGAATGGGTGGCACTCATACCTCACTTCTACTCTGGCAG .....((((((.((((((((((((..((....))..)))....(((((...)))))..(((((.......)))))))))))).)))))).)) (-30.60)	43	0	8	1	176
Aup1 (7)	CCTCCTGGGGAGAAGGGGAAGAAGACCTGACGAGGCTACAGCTATAACCTTCCAATTCTCCCTAG ....((((((((((..(((((.((.(((....)))))...........)))))..)))))))))) (-24.60)	22	0	4	31	107
B4galnt1 (4)	GTGGCAGGGGGAGAGAAAATGAGGAAGAATTCAAGACTGTCTGTGAAATTCTGGCTTCCTCATTCTACCTCCCAG ......(((((..(((..(((((((((..((((((.....)).)))).......))))))))))))..))))).. (-25.00)	19.67	8	5	92	396
B4galt7 (4)	GACCCGAGAGGAGTGACAAGAGAGGCAGCCTGACACCTGCATCCTTTGTTCTCCTCAG .......((((((.(((((..((.((((........)))).))..))))))))))).. (-21.90)	19	16	1	17	272
C530008M17Rik (5)	GTGCCTGGCATGTTGGTTAGGGAGGTGTGGGAAAAATGCTAATCGCGCTTCCCTTCCCAATGCCAGGACCGAC ((.((((((((..(((..((((((((((((............))))))))))))..))))))))))))).... (-37.90)	35	20	0	8	1213
Cacna1g (5)	CAGAATAGGGGCACACAGGAGAAGTGAAGGCCCTTGCAGCCTCTGCTGAGATCATTTCTCCTCTGCTTACCCTGCAG .....(((((...((.(((((((((((..((....))...(((....))).))))))))))).))....)))))... (-26.80)	14	0	6	0	3696
Cad (30)	AGAGACGGAAGGGCAGGGCATGTCACGTCGGGGACCTCCTGTGAATTGTCCTCTCTCCCCAG ......((.((((.((((((..(((((..(((....))))))))..)))))))))).))... (-22.00)	6	1	6	17	217
Capn5 (9)	TCCTTTCGTGGTAGCCACTTGGAGATGGGATAGTCTCTGATGCGGGGCTGTTTATGCCCCATCTCCTCTTGTCTCCACACAG .......((((.((.((...(((((((((((((((((......))))))))......)))))))))...)).)))))).... (-33.20)	28	10	2	6	2030
Ccl9 (1)	TCGGGGTGGGGATGGTGAGTAGAGATGCTAAGACAATGATGCTAACCTCTGCCCTCTGTCTCTTCCAG ....((.((((((((...((((((..((............))....))))))...)))))))).)).. (-20.40)	92.5	28	2	3	1942
Cd19 (9)	CACTCTTGGAAGAAGCTGGAGACCAGGAAAAAAAGTGATATCTTTGTCTCTTTTCTTGTTCCAG ......(((((.(((..((((((.((((............)))).))))))...))).))))). (-19.10)	27	12	1	2	91
Cd97 (19)	TGCAGTGGGGCTGGGAGGGCAGGCCTAGGTGAGCTCAGCCTCAAAGGCCTCCTTCTCTGCAG .........((.(((((((.((((((...((((......)))).))))))))))))).)).. (-28.40)	3	4	21	157	76
Cdh2 (5)	GTGGACGCGTGGTAACCACAGGTGACAGATCTTCAAGTGCCTCTGCCCTCTGGTTGCTTTTGCAG ......(((.((((((((.(((...((((............)))).))).))))))))..))).. (-19.40)	1	0	16	0	2397
Crocc (5)	GTGGGTGACAGGGTGGGGCAGGCGTAGACCTTCCTGCCTCTGCTCTCCTCCTGACGCCCC ..(((((.(((((.((((((((.((((......)))).))))).))).))))).))))). (-31.20)	6	4	118	39	74
Csdc2 (2)	GTTGGGGGCCTGGGAATGGCTTTGGAGGCCCCAGCTCCAATCCGTCCTCCCTATCCCCAG ..((((((...((((((((..((((((.......)))))).))))..))))..)))))). (-27.20)	1	1	24	46	1641
Daam1 (25)	TCCCTCTGTGCAGAAAACAAAGTATACTCTAACCTAAGAGGACTCTTTCTCTGCACAG .....(((((((((....((((....((((......))))....)))).))))))))) (-19.00)	9	0	3	31	622
Dctn2 (7)	CCTTGCAGGGGTTGGAGGGTGACAAAGAATCGCCTCCTCCTCTTGCCCCTCCTCCTCCCCCATAG .......((((..((((((.....((((............)))).....))))))..)))).... (-20.70)	18	3	3	0	405
Ddx56 (8)	GGGGCGTGCGGAAGGACAGATCCTGTGGGCTAGTGGTACACGCTTGATCTTCTCCCTCTGCAG ......((((((.(((.(((((..(((.((.....))...)))..)))))..))).)))))). (-22.00)	21	10	2	24	90
Dhx38 (12)	TTCTCAGGGAATTGTCTCAAGCTTGGCTTTCCTCTCAGGCTGCTCAGTGCCTTGCTTGCTCTTCCCTGCAG ..(((((((((......(((((..(((......((.((....)).)).)))..)))))...))))))).)) (-20.90)	86	8	0	4	330
Dip2c (2)	AGCGCTGTAACAAATTTAAAAAAAACTAAAGTCTGAATTAATTAGTTTTTTTTCAACTTGTTACAG ....(((((((((.((.((((((((((((............)))))))))))).)).))))))))) (-17.90)	11.5	1	19	9	1657
Dnmt3a (2)	TAGTCTGGAACACAGTCCCTCTCGGGTCAGCTCTGGCTTACAGGGTGTGTCTGTGTCCACAG .....(((.((((((.((((...((((((....))))))..)))).....)))))))))... (-21.50)	5	0	29.5	28	14374
Dock2 (25)	AAAACAAAGGAAGCTAGACAGTAACCATACATACCTGGCACTGTTTTGCTTCCAGAATGCCGG ........((((((.(((((((..(((........))).))))))).)))))).......... (-20.40)	80	9	8	22	36211
Dock8 (18)	AAGCTCCTGGGTGGATGGTGAAAGAATAACACCTCCTGAGAGTCTTCCACCCTCTGCCCTCCCAG ........(((..((.((((.((((.......(((....))))))).)))).))..)))...... (-20.21)	282	42	2	1	312
Dtx2 (10)	ACATGAGGCCAGGGCAGTGTGGCGGAGCCTCAAAGGGATGTCCTTCCACCTACCCGGCAG .......(((.(((.((.((((.(((.(((....)))...)))..)))))).)))))).. (-22.90)	2	1	7	54	984
E2f7 (4)	AGACCTCTTGGGGAGTTGATGCTCAGAAGCGCTCATTTGCCTGACGTCTCTTGGCTTCTTCTCCGCAAACAG .......(((.((((..((.(((.(((..((.(((......)))))..))).))).))..)))).))).... (-23.30)	78	9	9	1	3940
Eef2 (6)	GTGGGTAAGCTGTGGTCCTGGCCTGTGTTCCCAGCCTTGGGAAGTCGCTCCCATGACCTGGCCTTGCTCATCTGCTT ((((((((((((.((((.(((...((((((((......)))))..)))..))).)))))))).))))))))...... (-30.40)	89	11	23.5	36.5	92
Efemp2 (8)	GTACAGGTGCTTGGGTGGGCAGGAGTTGAGCGGCTGGGAGCTTACTGTGAGTCCTAGAGTCCAACTCCACCTCCCTTGGCACAG ......(((((.(((.((...(((((((.((..((((((.(((.....))))))))).)).))))))).)).)))..))))).. (-39.70)	4	2	4	10	84
Eif2b5 (15)	CTGCTAACAGGAACAGTGGGAATGCGTGGTTCTCTCCTAGCAGCTGTCCCCTCTGCTTCCTTGCAG ((((....((((((((.((((.(((..((......))..)))....))))..))).))))).)))) (-24.50)	56	29	0	9	141
Emilin1 (5)	GATGTTGGGTGAGGGCATGGTGAGAGATGTCCTATTCACTGTGGTCCCTTTCTTCCAACAG ..(((((((.((((((((((((((((.....)).)))))))))..)))))...))))))). (-25.30)	157.5	90	1	1	558
Eml6 (10)	AGACAGCCAAGAGAGTCTGTGGAACTGAGGAAGCAGATGGACTCAGTTCCTCTCCTCTTGCAG .....((.(((((((.....(((((((((............))))))))).))).)))))).. (-22.40)	130	20	8	6	1725
Epas1 (8)	GTCTGGGGCGGGAGAGCCAAAGGCTTTTGCTAAAAGATGCAGATACTCTGAGCCGCTCTCTCTTCCCATCAG ...(((((.((((((((....(((((((((........))))).......)))))))))))).))))).... (-28.71)	21	5	8	3	579
Ercc2 (20)	TGCTGTCAGGGGGTGTGGGGGAAGGGCAGGCCCTCCGCCTCAGCCTCCTCATCCCCCAG ..(((...(((((((.(((((..((((.((....))))))...))))).)))))))))) (-30.30)	13.1	49.6	12	76	75
Fads2 (10)	TGGGTTGGAGAGGAGGTGGAGAACATGGGTCTTGGGTTGCACTCACTCTGCCCACCTGCTCCCCCAG ((((..(((((((.((..(((....(((((..........))))))))..))..))).)))))))). (-25.50)	14	6	3	24	790
Fam38a (16)	GCAGCTTGTAGGGTAGGGGCTGGGCCACATGGCCCATGGCTGAGTGCCCTGTCCTGCAG ......((((((..(((((((.(((((.........))))).))).))))..)))))). (-29.70)	19	27	2	4	66
Fbln1 (10)	TGCCATTGGCAGAAGGGTGGGACCGCTCCAGTGAACACGCTCTGAGCTGACTGCCCCTCTGTTTTCAG .......((((((.((((((....((((.((((....))))..))))...)))))).))))))..... (-24.00)	19	16	1	3	702
Fcho1 (17)	CGCGCTGGGAACAGGAACAGCCTGTGGGAAGGTAGCAAGCTCGAACTCGCTCCTGTCGCTGTTCCCAGTTGCGCAG ((((((((((((((..((((...(((((..(((.....)))....)))))..))))..))))))))))).)))... (-33.60)	45	2	13	61	335
Flnc (40)	CACCGAGGAGGGAGGGGTTCATGGAGACTGGATACAGCCTCTTGGTCTGACATCACCCCAACCCTTCAG ......((((((.((((((((.((((.(((....))).)))).....)))....)))))..)))))).. (-25.40)	1	1	3	40	202
Foxj2 (3)	CTTTGGGGAACACTGGGGCATACCCAATGCTCAGACCTAACTTGCTTCTTTGTTTCCCCAG ...(((((((((..((((((......................))))))..)))).))))). (-18.75)	60	48	2	1	2932
Fr1 (1)	CTTACTGGTATGAGGAGCAGGAAGCTGGGGGTTGTGGGGAGGGTGTCTGACCCTGCTGCCTCTTCCTCATCCACCAG ....((((((((((((.(((....)))(((((.((((((.((....))..)))))).))))).)))))))..))))) (-33.30)	42	30	1	14	282
Gbf1 (1)	CAACCAACCAAACAGCTGTGAAAAGGAAAAATATTAACCAATCTTTTCTCTTCAACTGTTCTGGTAG ......(((((((((...((((.((((((.((........)).)))))).)))).))))).)))).. (-14.90)	27	2	8	14	10727
Gcn1l1 (22)	TTTCCTCTGGGGGAAAGGTAGATCTGCCTGTGGATGTAGAACTGGCTTCTGACCCTGGTCCCTCAG ......((((((((.(((((((...(((.((.........)).))).))))..)))..)))))))) (-24.10)	68	13	1	6	997
Gm1060 (9)	GACTGAGAAGGCCGGGGATTGCTGAGGTCAGCTGCTGTGCTCAGTGCCTTCCCTTCCTTCACAG ..(((.(((((..(((((..((((((..(((...)))..))))))...)))))..))))).))) (-26.10)	20	5	2	3	519
Gm98 (11)	AGAAGTCCGGGACGGGAGGCAGTTGGCTTCCTTTTTCTTAGCTATCTGCTTCTGTCCGTAG .........((((.((((((((.(((((...........))))).)))))))))))).... (-23.80)	49	27	1	8	449
Golga2 (24)	GGCAGTGGGGGCTGTGCAGGGGGGTAGACTGGGGGAGCCACAGTGTCTGAGCCTTGTCCACCTGCCTGCCGTCTCCACAG ....((((((((...(((((.((((.(((.((((((((....)).)))...))).))).)))).))))).)))))))).. (-37.20)	16	14	5	6	101
Gramd1a (14)	GTAGGGGACTGAAGGCTGGCGGCGCAGGGGCGGCTGTGGCCCAGCAGGGTACAGACATACCGAGCCATCTCTTGTCCCTCAG ...((((((.((.((((..((((((....))).((((.((((....)))))))).....))))))).))....))))))... (-32.30)	19	6	25	20	82
Grin1 (6)	ACGGTGAGTGCTGGGCTGTGGGGTCGCCTGGGACTGTAGGCCAGTCCAGTCTCTAAGCTCCAGGGTCCCGCGCAG .......((((.(((((.((((((.....(((((((..((....)))))))))...)))))).))))).)))).. (-33.80)	2	0	29	18	72
Grin2b (6)	GGACCAGGAGAGGCTAGAGAACTATCTACGGCTTATGGCTGCTGAGTTCTTCGTTCTCTCTGTGCAG ......(((((((...(((((((.....((((.....))))...)))))))...)))))))...... (-20.90)	3	0	42	5	62751
Grina (3)	TGTGGTGTGGGAGGAGCCACAAGGAGGCCGCCAAGGCGGGGCTCTGATTGGCTCCTTCCCCAG ..(((...(((((((((((...((((.((((....)).)).))))...)))))))))))))). (-36.50)	6.33	5	1.5	26	80
Gss (6)	GCAGCAGGAAGGGCGAGGTCTGCGGCGACCCTGGCTCACTTGTGCTCTTTCTGCAG ...((((((((((((((((..((((....))..))..)))).)))))))))))).. (-23.90)	0	5	73.25	27	4346
Gzmf (4)	AGGAGGAGGTGGGGAGAGCAGAGCCTGATGGACCCAGACTCACCAGGCTAAGTTCTTCCTTTCTCCACCCACAG .((.(((((.(((((((((..((((((.(((........))).))))))..))))))))).))))).))..... (-36.70)	47.5	42.5	3.25	1	398
Hip1r (27)	TTGGCTGTGGGGGCTTGCCAGACTGTTCATGATGTGGAAACCCAGACTCTTGGTTGGCCCGGCCCCACAG ....(((((((((((.((((((((((((((...)))))....)))..))).))).)))))....)))))) (-24.30)	1	0	1	22	113
Hip1r (3)	CACCCTGCCCAGTGCTGGGAGGGACGGCTCAGGTTCTGTGTCCTCCCCTCCCTTCTCTGGTTGCAG ....((((((((....(((((((..(((.(((...))).)))...)))))))....))))..)))) (-29.90)	6	4	13	21	203
Hspg2 (35)	ATGACAGGGGAGGATGGGGATTCAGGGCAAAGGACCTGACCCTGTCACACCTGCAG .((.((((....(((((((..(((((........))))))))))))...)))))). (-24.90)	40	5	1	10	415
Hspg2 (41)	TTGCGGGGGTGGGGGTGGGGCTTGAGCTGGAGCTAGACCTAGACAAGTCTCTCCCCACCCCAG .....((((((((((.((((((((..((((........)))).)))))))))))))))))).. (-37.80)	2	3	7	45	114
Hyou1 (15)	TGGGGTAGGAGGTGGAGCGGCTGCCTGATTCCCTCATGAACCTCTCTGCTGCTTTCCTCCTAG .....(((((((.((((((((.......(((......))).......))))))))))))))). (-22.74)	56	26	1	24	157
Ing4 (4)	CCAGCTAGGAGGGAGCGGCACTGCCTGGACCAGGAGCAAAGAGAACTTAACCCATCTTTTTGTCTCTGCCTCCCGGCTTACCCTTTCTTCCTAGAAG ....(((((((((((.((....(((.(((.(((..(((((((((..........)))))))))..)))..))).)))...)).)))))))))))... (-39.40)	32	24	23	5	156
Inpp5a (12)	AGAACTTGGAGGATTGCTGGAACCAGAGTCTAGCTAACACTTTGTTCCTGTGTCTCCACAG ......((((((...((.((((.((((((.........)))))))))).)).))))))... (-17.70)	30	6	1	5	7506
Itfg3 (3)	AGAATAAGGAAGACAGGAGGTGGCATGCGATAGTTTGAGACTGACCAAGTGGCTGCCACCTCTACCTTCCAG .......(((((...((((((((((.((.((.(((.......)))...)).))))))))))))..))))).. (-29.70)	17.2	9	1	14	316
Jup (3)	CCCTCTGTGGAGGAGGAGCCTGAGGCTATCTGCTCAAGGTCTCACACACTTCCTCCAGGTAGTGG .((.((((((((((((....(((((((..........)))))))....)))))))))..))).)) (-25.20)	36	16	0	27	149
Kif13a (6)	AAGTGCTTGGGAGAAAGGAGAATCCCCCAAGTGTGGTAAGATTCACCCACTTGATTCTTCTTCCTCCCCTAG ........(((((.((((((((((....(((((.(((.......)))))))))))))))))).))))).... (-28.10)	6	0	18	64	4013
Kif1c (9)	CGGCAAAGCAGAGGGCACGTGGATCTGATTGATAGGGGAAGGTCTCAATTCCACATTCCTGTCCTTTGCCAG .(((((((...((((...(((((..(((..(((........))))))..)))))..))))...))))))).. (-24.40)	18	26	9	12	141
Klf2 (1)	AGACTTTGGGGTGCAGGGTAGCAGGAGGCACCCCCACTCACGTCCCGCGCCCTGTCTCCTGCAG ((((...(((((((.(((..((..(((.........)))..))))))))))))))))....... (-22.90)	47.83	30	27	34	276
Kpnb1 (1)	GTGACCGGGGTGGGGGAGGGGGTGGCCCCTCTGACCCCGCTGCCTCTCCCCCCATCTCTCCCGGCAG .((.((((((((((((..((((..((............))..))))..)))))))....))))))). (-37.60)	13.38	4	37	27	98
Ksr1 (7)	CCAGGTGGCAGAGGCTGAGTTGAGCTTGCAGCCTTGCTCATCTCCGCATCTCTGGCCTTGCAG ..((((..(((((((.(((.(((((..........))))).))).))..)))))))))..... (-22.40)	10	6	10	4	3111
Lama5 (57)	TGGGCCAGGAGGGTTGGGTGGAACTTCTTGCCACTGAGGCTGCCTCCCCTCCCTCCACAG .......((((((..(((.((..((((........))))...)).)))..)))))).... (-26.60)	13	761	2.5	3	298
Lat (4)	CACCTTCTAGGTTGGGGAGGCGCTTTTTCCTGGTTGTCTTGCTCCCAGAGTCCTACCTAGACGTAATCTCTGACCTTTGGCTTCCAG ..((....((((..((((...........((((..((...))..)))).(((.......)))....))))..))))..))....... (-21.50)	1	0	271	516	131
Lcp1 (14)	TTCCCTTGAGGCAGACAGAAGGAACTCTAGAATAGATTGATAAACCTTCCCTTTGTCTCTACTTAGGACCCA ...(((.((((((((..(((((...((...........))....)))))..)))))))).....)))..... (-17.50)	94	20	1	1	2772
Ldb1 (2)	TGAGCAGAGAGGGGTGGAACAGCACGGCTCAGCCACTGACCTCAGTTCCTTCCCTCCCCAG ........((((((.(((((.....((.((((...))))))...))))).))))))..... (-20.60)	38	12	0	6	107
Lemd2 (8)	CTCTGTGGGAATGGAGTGGTTCAGCCTGACCCAGCTGAGCGCTACCTTCTCCTTTCAG ..(((.((((..(((((.(((((((........)))))))))).))...))))..))) (-20.40)	21	16	2	1	2141
Lgmn (4)	AGATGTGGACAGGGGAACAGGAGTGGGAAGCTGTGGCTCCCTGGCTCACCCGCTCTGTGCTCTCTTGACAG .....((..(((((((.((((((((((.(((((.((...)))))))..)))))))).)).))))))).)). (-27.60)	21	12	7	0	757
Lilrb3 (10)	ACATGCCCAGGGGAGGGGCTTCCCATCCTCCTAGCTGAGACTCCCCTCCCTTGCAG ...(((..((((((((((..((.((..........)).))..))))))))))))). (-22.90)	1	3	17	8	293
Lpcat3 (8)	TGAGAAAAGGGGAGGCTTGGAGGCGGCGAGTGGCGAGAGCCCTAACCATCCTTCCCTTCAG ......(((((((((..(((..((.....))(((....)))....))).)))))))))... (-23.10)	23	21	0	7	89
Lpcat4 (6)	GTTGGGGTCTGCTGAAGGAGACTGGCTGGTTTCCAGGAAGAGAACTAACCTCTGCCCCTTCTGCTTTTCCCACAG ..(((((...((.((.(((((((....))))))).((.((((.......)))).))...)).))...)))))... (-24.30)	41	12	4	1	196
Lrp1 (27)	TGAGAAGGGCCAGGGAGGGATCAACACATCCCAGGATGCTCTTGCTTCCTCTCTCTGGGCCAG ......((.(((((((((((.(((..((((....))))...)))..))).)))))))).)).. (-28.90)	6	2	5	37	163
Ltbp2 (6)	CTTCACAGGGCAGAAGTGAGGTTAGGAGCCTGTTTCTCGGCTCTGATCCCAACCCTTCTGCCCAG .......(((((((((((.((...((((((........))))))...))))...))))))))).. (-30.90)	21	6	2	6	598
Madd (5)	TGGGCAGAAGAGTGTGGATGTTAGAGAGAGGTTGCTAGCTCTAGGTCCTGGCTCTTGTTGCAG ...((((((((((..((((.((((((..((....))..))))))))))..)))))).)))).. (-24.30)	8	2	14	29	94
Magt1 (7)	TCTTCATGAGAAACTGGGAATAGGAAAACGGTTGTCTTTTGTGGCTACATGAATTTCTCCTTAAACAGTTTCTCTAAG .......(((((((((.....(((((((..((.(((......))).)).....))).))))....))))))))).... (-19.60)	10	1	58	8	4229
Man2c1 (9)	GGGGACACGGGGACTTGGCTGAGGCAGCTCCACTGAGAGCTGAGAGCCTTATCCCCGCAG .......((((((...((((....((((((......))))))..))))...))))))... (-27.50)	461	251	95	40	94
Map3k12 (5)	TGGGTAGAAATGTAGGTCCCAGGTACACAAGGCAGATAATTAAGCTTTACCCCTGTCTGGCCCTCAG .(((((((....((((.....((((....((((..........)))))))))))))))).))).... (-13.10)	5	0	65	357	163
Map4k4 (13)	GTTACCCACACAGGGGACTCAGTCGCGTCCCTCCTGGATGTACTGACTGCTGGGTCATTTCTGTGTGACAG ......((((((((.((((((((.((((((.....)))))).......))))))))...)))))))).... (-27.80)	93	32	3	1	2705
Mast1 (4)	GACCCAGGGGTGAAGGGCAAGGATCTCACTTCTGAAACCTGCTCTGTGTCCTTGTCCCTGAAG ....(((((..((.((((((((...(((....)))..)))......)))))))..)))))... (-19.50)	5	0	15	22	107
Mfap4 (4)	GGGGCCATGGGGTGGGGGCTGCCCCTCAGCCAAGTCTCTGCTGACCGGCTGCCACCCGTCCCTAG (((((....((((((.(((((....(((((.........))))).))))).)))))))))))... (-32.80)	3	4	4	24	72
Mknk2 (5)	GACTGAGGCAGGGCTAGGAGCTGGCTGGTCTGTGGAGGTGACCTAGCTCTCCCTGGCCTGCACAG ..(((..(((.(((((((((..((((((((.........)))).)))))))).)))))))).))) (-29.40)	13	2	15	41	227
Mllt6 (5)	GGAGGAAGGAGGTGGGGGGCTGCTGTGGTTTGTTTGTGGCTGCACCCTTCTGACCCACTTCTCCTCAG .(((((..((((((((((((.((..(((.....)))..)).)).))).......)))))))))))).. (-28.01)	33	17	69	10	181
Mlst8 (3)	CCTAAGGTAGAAGCAACTCCTTTGAGCAGAGAATGGGGGCTTTTGGTAGAGGCATGGATCAAATCCATTAGAAGCCATGTGTAACCTTAACTCCCCACAG ...((((.((......))))))...........(((((..((..(((....((((((.((..........))..))))))...)))..))..)))))... (-22.80)	0	128	10	20	357
Mpnd (5)	GCTGCTGAGAGTACTCAGGACGGGTGGAGGTGGGAAAGAGCCTGAGTTCCTAAAGCCCTGGGACCCTCCTGACTACTCCAG ....(((.(((((.((((((.((((((...((((((..........))))))...)).....)))))))))).)))))))) (-31.40)	31	8	0	5	166
Mtss1 (3)	CTAGGATAAAGATTGAGCAGGGTGGTAAAATTATTTACTATTCTGCTTTCTCTTAG ........((((..(((((((((((((((....)))))))))))))))..)))).. (-21.80)	27	18	4	8	2063
Myl9 (1)	TAGACCTCAGGGGAAGGCAGGGATGATCCCTGTCCATCATCATCCCCCGCCCCTCCCTGTAG .....((((((((..(((.((((((((...........))))))))..)))..)))))).)) (-25.70)	105.5	47.5	1	18	3012
Myo7a (21)	GATGGGGGAGGGGTGAGGCAGAGCTGTGGCGACTTGTTTCTCTGGCCATTCCTTTCCTCAG ..(((((((((((...(((((((....(((.....))).))))).))..))))))))))). (-24.40)	1	1	51	8	308
Napa (10)	GGACTGGGGCCAGGGAGGGTTCCAGGAGAGCAGTGTGTCATGGCTCACCCTCTCTGTGCCATAG ...(((.(((((((((((((.......((((.(((...))).)))))))))))))).))).))) (-29.31)	3	5	24	9	813
Ncor2 (4)	GGAGTGGGTGGGGTGTGAGGAGTCACCCACAGATCCGGGTGCCTGCCACTCCACCCCTACAG ..((.((((((((((..(((...(((((........))))))))..)))))))))))).... (-32.50)	26.5	14	6	5	694
Ndufa3 (1)	GGTGATACGAGAGTGTTAGAGGTCACCGCAGTAGTCCCCAAGGGTGACTGTCTTCTCACCTCTCTAG ........(((((.((.(((((.....(((((...(((...)))..)))))))))).)))))))... (-21.80)	214	63	15	11	209
Nfyc (3)	ACCAACGCAAGAGGCTGACTGGCTTGAACGCTTTATCTGGTGGTTAACAGTGCAGGCCTACAATCTCTTACAG ........(((((..((...((((((.((.....(((....))).....)).))))))..))..))))).... (-19.80)	26	3	23	5	2238
Nlrc5 (3)	CTACCACCTGGGGCTTCCAAGTGCCCATTCCCACAGCTGAGGGATTGGGTCTTGGTCTCCCTGCAG .........((((...(((((.(((((.((((........)))).))))))))))...)))).... (-28.80)	1	0	34	21	2005
Nod1 (5)	CACTGTAGGAGAGAGTGTTCAAGCGACAGTGAAACTTATAAAGCCCCTGGCTGTGCTTTCTCTCCAAG .......(((((((......((((.(((((...................))))))))))))))))... (-17.91)	23	4	6	5	1082
Nop2 (11)	TGGGATTGGGCTGGGGAGGAGGTAGTGGGTGTGAGGCAGAGGAAGTGCTGCTGAGCTGGCTGGCACTCCCTGCTCCCTGCCCCTAG .......((((.((((((.(((....((((((.((.(((....((.....))...))).)).))))))))).)))))))))).... (-41.10)	86.67	110	13	48	588
Nup214 (33)	GTGAGTGAGGTGTGGGCAGCATGAGGACTAGGGCCATGACAACCCTGTCCCATTCTCACCGCACCCAG .....((.(((((((..((.(((.((((.((((.........))))))))))).))..))))))))). (-29.10)	73	17	4	51	3434
Nwd1 (8)	AGTCCAGGAAGACAGGATGACCATTCTCCAGCTCTCAGAATGATCCATTCCTTGTCCTCCACAG ......(((.(((((((.((.((((((.........)))))).))...)))).))).))).... (-18.10)	6	0	16	5	579
Oraov1 (3)	TGCCCTGAAGATGCAGTGGTGTGGGGCCTGGAGTCTCCTGGGTGACAGCCCTGCCCCCATGCATCTCAG ....(((.(((((((..((.((((((.(((..(((.....)))..))))))))).))..)))))))))) (-29.30)	34.33	40.5	2	2	1543
Pacsin3 (6)	GCTGGTGCGGGCCTGAGTGGAAGGCAGTCTGTCCTCACTGCCTCCCTTCTCTCTCACCCAG ...((((.(((...(((.((.(((((((........))))))))).))).))).))))... (-23.50)	23	5	1	3	1101
Pank4 (7)	ACACAGTGGATCTGACTGGACACTGACCAGTTATGTGTGGGCTTGGGCTGGGGCAG ...(((((..(((....)))))))).((((((..((....))...))))))..... (-14.20)	1	0	929	60	594
Pcnxl3 (8)	GTAAGACAGGGCAAGATTGACCCAAGGGAGTGAGTCTGAAGGGTGGGCCCAGGAGAGGCTGGCAGGCTAACTGGTCCTTCACTTCCTACTCCTGGACAG ........(((((....)).)))..((((((.((...((((...(((.((((....((((....))))..)))).)))...))))))))))))...... (-31.10)	0	2	265	43	99
Pelp1 (10)	TGGTCATGGTGTGGAGAAGGGAACGAACATACTGGAAATGAAGGCCACCGTTCCGTCCTCTGCCCCTAG .......((.((((((...((((((......((........)).....))))))...)))))).))... (-17.90)	204	60	1	4	80
Pfdn5 (4)	GAGCTTAAGGGGAGAGGTGTGGTGTAGGACAGGGTCTCTCTAGTCTTTCATTCACCTCTGCTCTTGCAG ..((..(((((.(((((((.((((.(((((((((...)))).))))).))))))))))).))))))).. (-30.00)	40	11	19	3	115
Pfkl (14)	GAGGCACTCTGGTTTTGTGAGTTGTATGTATGCCTCCTAGCCAGGCTGATGTCTCTCTAACCACAG ((((((.(((((((....(((..((....))..)))..)))))))....))))))........... (-16.60)	1	44	6	0	574
Pik3r2 (14)	TCGCGTTGGTGGTGGAGGATGAGAGCTCTCCAGGCAGTGGCTCCTCTCCTGCTTCACCCCACAG ....((.((.(((((((...(((((....(((.....)))...)))))...))))))))))).. (-22.10)	20	16	3	14	115
Pkd1 (14)	GTGTCCATGGAGTAACAGGTGCTTGGTGGGGGTTCTGTGAGTAGGAAGTCCCACTTGGGCCTGTCTCCACAG .......(((((..((((((.((.(((((((.((((.......)))).))))))).)))))))))))))... (-32.40)	65	21	4	8	508
Plcg1 (2)	TTGAATTAGGAGATGGGCTAGGTGTGGAATGGTTTTTGCCATGACCTGGTCTGCTTCCACAG ........((((..(((((((((.....(((((....))))).)))))))))..)))).... (-23.80)	54	26	2	1	88
Plec (13)	TTACCTGGGAAGGCTGGGTTAGGAGGTCTGAGACCCGCCTGACCTCCCAACTCCTGTGCTTCCTCAG ....((((((((((.(((((.(((((((............))))))).))).)).)).))))).))) (-28.30)	63	42.5	12	11	76
Plekhg2 (4)	GGGATTCATGGGGCCATGGGGATCTAGGTGGTGCTGACTCCCATGTCCCCACAG ........(((((.((((((..((.((......))))..)))))).)))))... (-23.50)	5	1	14.5	18	95
Plekhg2 (8)	TTTCTGAAGGGCGCCTGTGCAGGACGCGCTCAGCTTCCTGCCCTCTCTGCCCTCCTCAG ...((((((((((.....((((((.((.....)).))))))......))))))..)))) (-24.80)	46	41	1	6	2089
Plin2 (1)	TGCCTAGGTTGGGACAGGAATTGGTCCTCAATGTTCTGAAACCAGTTTCTTTTCTCTCCAG ......((..((((.((((((((((..(((......))).)))))))))).))))..)).. (-19.40)	33.17	20.83	1	14	1239
Ppp1r10 (18)	TCTGGATTGGGGTACGATGGTGATGGTGATCTCTTAGGTGTTTGTAACCATTCTGCCATTGTTCCCACAG .(((...(((((.((((((((((((((...................))))))..)))))))))))))))) (-22.61)	178	69	1	1.5	257
Ppp2r5d (10)	TTCCTAGGTTTGGTAGAGCAGGTGTTGAGAATTGCAGTGAGTGCCCACTCAACTCCACTCTCCTCGCCAG ......(((..((.((((..((.((((((....(((.....)))...)))))).)).))))))..))).. (-23.60)	139	29	0	6	89
Prkar1a (4)	CTGATAGGACTGAGAACCTGAGAGCGACTAAGGCTTGGAGTCTAACCCCAGGTCTCTTCTGTCCTGCAG (((.((((((.(((.(((((.((((.......))))((.......)).))))))))....))))))))) (-22.60)	55	15	9.5	1	161
Ptpn23 (14)	CTATGTGGAAGGAACTGGGCCAGCCCAGCATCCACCCGATCCTGTGTCATCCCTCTTCCTTCCCTAG ......((((((((..(((...((.(((.(((.....))).))).))...)))..)))))))).... (-23.00)	12	20	26	12	281
Ptpn5 (3)	CAATATAGGGGCAAAGGGCTGCAGCCGTACACTCAGTCTGCGCCTCCCAACTGCCCCAG .......((((((..((((.((((....((.....))))))))))......)))))).. (-20.60)	28	15	0	4	542
Ptprf (31)	TCCCGAAGGCCAGGGAAGTTGATTGTGTGAAGGGAGCAGGACTCCTGACACAGCCATTCTCTGAGCAG ........(((((((((..((..(((((...(((((.....))))).)))))..))))))))).)).. (-24.60)	20	0	700	89	112
Ptprs (14)	CCGGCAGCGGGCATAGACAGCTAGAGGGCGTTAGGCCAGTTGGGGGTCCGGATGTGGCCAGCACTGATGACAGCCCCTCCGCTGCCTCTGTCCTGCAG ......(((((.(((((((((..(((((.(((.((((((((.((...)).))).)))))))).(((....))).))))).))))..)))))))))).. (-39.70)	40	18	5	3	896
Rab40c (1)	TGGCCAGCGGGCGGGAGCATCAGCGTCCTGACCGCACGGCCGCTCACCAGCCTTCGCCCGCAG ......((((((((..((...((((.((((....)).)).)))).....))..)))))))).. (-27.40)	170	80	8	4	102
Rad17 (11)	TGAGCATATGAAAGCGCTGTGATTATAAAGATTAGTAATCGCAGATATTCTTTCATAG ......((((((((..((((((((((........)))))))))).....)))))))). (-18.90)	18	3	3	14	1554
Rasal3 (3)	GGGTTAGAGGGAGAAGAGGAGACTCTGAAATCAGCATCTCCTCTTCTTCCCAG ........((((((((((((((..(((....)))..))))))))))))))... (-28.30)	202	27.83	7	43	3006
Rbm12 (6)	GTTGGTGGGTAGAGCGGTGGGAGCTCTTCATGGGCCAGACCAGAGGTCTCTACTCTCCACCCCCAG ..(((.((((.(((.(((((((.(((....(((......)))))).)).)))))))).))))))). (-28.40)	32	41	0	14	152
Robld3 (2)	AACCCTGGGGAAGGCAGGAACTAAGGATGTCAAGCAGAATGCCCCAAAGTATCATGTCCTTCCCACCAG ....((((((((((((.(((((..((...((.....))...))....))).)).)).)))))))..))) (-18.80)	32	6	0	3	1569
Rpap1 (11)	TAGGAATGGGGCAAATGTGCAGTAACGGGTCAGCAAAGGTTCTATCCAAGTTCTGCATCTTGTACCCAAG ......((((((((..((((((.(((((((.(((....)))..))))..))))))))).)))).)))).. (-20.20)	16	2	29	0	159
Rpl36 (1)	GCATGCGGGCGGGCGCGGGCCGAGGTACCGTGTCTCAGCCGCTGTCTTGTCCCCGCTGCCCACAG ...((.((((.((((.(((.(((((((.((.((....)))).))))))).))))))))))).)). (-28.20)	8	14	13.83	34	137
Rps5 (3)	TTGTTTAGGGTTGAAAAGGTTGGGGGTGGATATCAGGCTCACGCCTCCCTTTTCTGCCAG ........(((.((((((...(((((((((........)).))))))))))))).))).. (-21.10)	17	41	7	87	135
Rps6ka4 (1)	GCTCTCCCGGACGGGTGGCAAGAGTCAGCGACCCTCTGGGCTCACTCGCCCCCCTGTGTCCGCAG .......((((((((.(((..((((.(((..((....))))).))))))).)))...)))))... (-24.00)	43	16	4	3	87
Rsu1 (3)	CGTTCAATAGGGAAGTGTGTGGCTAGCATCCTTTGCCCCTTGAATTCACATGCTGCATCTCCATCCCTATAG ......(((((((((.(((..((..(((.....)))....((....))...))..)))))...))))))).. (-18.30)	143.33	26	0	6	17319
Rtf1 (1)	AGATCCTGGGGAGAATGGCCATTTCATTACACTTTTCTGGTGAGCAAAACTGACGTGACCATTTCTGCCCAATTAG ......((((.(((((((.(((.(((...((((.....))))........))).))).))))).)).))))..... (-19.90)	10	5	15	7	16835
Ruvbl2 (14)	AGTGCTGTGGGAGAGGGCTGTGCGGGAGCGCTCAGCTCACTCACGCTGGCTCCCTCTCTCTGCAG ..(((...(((((((((..((((....)))).((((........))))...))))))))).))). (-31.10)	43	30	11	8	86
Ryr1 (65)	TCAGGCGGGTTGTAGGGAAGGTATTGGATTGACAGTTGGCATACCCTGACCTATCCCTGCACCCCAG ......(((.((((((((((((...((..((........))...))..)))).)))))))).))).. (-26.50)	11	9	18	11	1373
Satb1 (7)	TTTCTAAAGGGTGAGGCGAAGGCAGGGGCTATGCAGAACCTCACCCCATGTCTTTCTTCCCCTACAG .......((((.((((.(((((((((((...............)))).))))))))))))))).... (-24.26)	77	54	2	0	7193
Scrib (20)	GCCTGCATGGGTAAGTTCAGGCAGGTCTGGGACCTGCCCTGACCAGCCTGTCTCCCCATCAG ..(((.(((((..((..(((((.((((.(((.....))).)))).))))).)).)))))))) (-30.10)	30	12	10	5	442
Sdc3 (2)	GCCTGCCTGGGGACCTGGGGGTGAGGAACACCCACTCCCCAGAGCTTTCCTTTCCCCACCTCCCCAG ......(((((((..((((((.((((((......(((....)))..))))))))))))..))))))) (-29.70)	16	15	3	5	1619
Sema4b (11)	GGCAATACATGCATGGCTGGTAGATCGTGGGCGGTGGGCTCCACCACGGCCTGAGTCGTGACCATGCTTGCAG .........((((.(((((((.(((..(((((.((((......)))).))))).)))...)))).))))))). (-30.40)	48	3	5	1	110
Sema6c (12)	GCTCCTGGGAGTGCTCAAGCTTCATTAGACAAGCTGTCCTCACCTGAAGCCTGTCGCTCCAG .......((((((..((.((((((...(((.....)))......)))))).)).)))))).. (-20.20)	9	0	2	20	177
Sf1 (11)	GCAAATGGGGCTTCTAGCCCAGGACCCTGCTCTCTAAAGCCCAGGACCCTGGTCTTACTGCCTGCAG ((.....((((....((.(((((..((((..((....))..))))..))))).))....)))))).. (-22.60)	3	0	68	93	110
Sf3b3 (6)	AAGGATGGATTCCAGCACAGCGAGTTGCTCATGTCTAAGCCGTTCCTGTGTCTGGTTTCCCAG ......(((..(((((((((.(((..(((........)))..)))))))).))))..)))... (-24.00)	15	3	4	10	1522
Sgsm2 (6)	GCTGGAAGGTTACATCCTAAGGCAGCTTCCCAGGGCGGGGGCCTGAGCTGTGACTCTCCTGGCAGA ((((((..((((((..((.((((....((((.....)))))))).)).))))))..))).)))... (-26.50)	1	0	40	49	235
Slc24a6 (11)	CACTGTGGGGGCTAGCGGGAGGAAGTGGGGAGCCAAGCCTGGGGGATCCCAGTTCCCCTTCTTGCCCCACAG ..((((.(((((.((.(((.((((.(((((..((........))..))))).))))))).)).))))))))) (-37.80)	20	6	10	13	1940
Slc29a4 (9)	CTGGCTGGCAGAGAGACGGGCTTATGGCTAGGTGGGTAATCCCAGACTCCCTGCTCTCTGCAG .......((((((((..(((.........((.((((....))))..)))))..)))))))).. (-24.20)	1	0	10	37	1058
Slc4a2 (1)	CTTCCTGGAGTGGGACCGGGCTAGCCTACTCTTCAGCGATGGTGACTAGCCCTTTCCCCCACTCAG .......(((((((...(((((((..((((.((....)).)))).))))))).....))))))).. (-26.20)	51	53	3	15	2087
Slc6a8 (4)	CATCTTAAGGGGGATCAGGGATCCAGAGCCTCTCTGAGCACCCTGGCCCCCCAG ........(((((..(((((...(((((...)))))....)))))..))))).. (-27.80)	22	14	7	13	1182
Smurf1 (15)	GTCTTGGGGGAGGGGCGGGGGCAGTGTTTTGTGCATCTGAGGGTAACACTCAGCCTGGCGCCCTTCCCCAG ....((((((((((((.(((...((((.....))))(((((.......)))))))).)).)))))))))). (-36.20)	5	1	33	50	687
Snrnp70 (6)	TATGTGACAGGGTGGGTGGGGCAGCCCTGTAACTTGTGGAGCTGACTGCCTCCTGCCTGCCCTGCAG ....((.(((((..((..(((((((((..........)).))))......)))..))..))))))). (-30.90)	27.67	56.67	100.53	126	3357
Snx32 (10)	TGGAGGGCCATCAGCAACATCCATGACAATAGCCATCTTGCGCTGCTGATGGCCTTAG ...(((((((((((((.((...(((........)))..))...))))))))))))).. (-23.40)	1	1	4	46	98
Socs7 (4)	GTCTGTCTAGGGTTGGAGCAGTGTGGATAAACAAGTGGTCTCCATTCTCTTGCCCTGCAG ..((((..(((((.((((.((((..(((.........)))..)))))))).))))))))) (-21.40)	21	5	2	7	837
Spns1 (2)	GTGTGTTAGGGGGTTGCTGAGGGACCTGGACTGGGCTGTGACTCTCTGCTTCCCCCCAG ........(((((..((.(((((.(((.....)))......))))).))..)))))... (-20.50)	8	11	13.17	6	1470
Srm (5)	TGGGGCGAGGGCAGGCACTAAGAGCCCCATCTTGATGCTCTTTGTCCCTGGTTCCCAG ((((((.((((((((((.(((((......))))).))))...)).)))).)).)))). (-24.40)	10	2	32	35	85
Ssbp3 (14)	AGAAAAGGGGTGCGAAGGGCCTGGGTCCACTAACCAAGCCCTGCTTACCCCACAG ......((((((...(((((.(((.........))).)))))...)))))).... (-25.10)	16	12	42	28	6282
Ssrp1 (10)	AGGCGTGGGGAAGTGCTTTGAGTGTGCAGAAGTGCTGGTTTGAACACGGTGGCTGACACTCATGTCTTCCCTCGCTAG .((((.(((((((.((..(((((((.(((...(((((((....)).))))).)))))))))).))))))))))))).. (-34.10)	82.33	13	5	2	377
Strn4 (17)	CTTCCCGGAGAAGATAGAGGGAGGAATTGGAGCTAGTGAGGGGCACTGTCCTAACCAGCTGCCTTGCCTTTGTCTCTCCAG ......((((.(((((((((((((......((((.((..(((((...))))).)).)))).)))).))))))))))))).. (-32.60)	22	3	0	6	233
Sytl2 (11)	GCACTGGGGTGTCAGGAATGCGACATAAACACTGCCTATTTCTGATGCACCCAG ...(((((((((((((((((((..........)))..))))))))))).))))) (-21.30)	21	2	2	9	1191
Tanc2 (4)	AGCAGTTTGAAAGGGGCAAGCTGTATCCATTGTACCTGTTAAGTGTTCTGCTTGTTCCTTTCCTAG ........((((((..(((((......((((..........))))....)))))..)))))).... (-19.60)	221	46	19	21	269
Tapbp (1)	GTCTGAAGGGGCGGGCCGGTCGCCGGTCGCCGGACATCCTATGGCCCTCTGGTCACCGGAGCCCCTCTCCCCAG ....((((((((...(((((.(((((..(((((....))...)))...))))).))))).)))))).))..... (-35.70)	8	1	13	146	146
Tcf3 (7)	GCCACATGAGGGCATGTGGAGATGGCAGTGGCCAGACCTTCCTCTCTGCTCTTGCTCCCAGCAG ((....((.(((((.(((((((((((....))))........)))))))...))))).)))).. (-20.00)	32	41	0	2	651
Telo2 (14)	AGCCCTTGGGTAGTCTTGGAGCTTTAGCACAGTGGCTTCTCCTTTTCTACCCAGGTAGCCA .((.(((((((((....((((....(((......))).))))....)))))))))..)).. (-24.00)	22	1	4	20	129
Tm7sf3 (10)	AGGCCACCGAGAGAGCTGGAGGCTGCTCTCATTCCAAGGGTGATACCTGTCTCCTCTGCTCTCCCGCAG .......((.((((((.((((((.....(((((.....))))).....))))))...)))))).))... (-25.70)	18	24	5	2	1288
Tmed9 (4)	TTGCAAGCTGGGAACACAGCGGTTCCAGCAGTCTTAGACTACTAAGCCTTGCCGCTTATTTCCCAACAG ........((((((...((((((......((.(((((....))))).)).))))))...)))))).... (-20.90)	14	1	24	7	1226
Tmem49 (1)	TTCTTTGAAAACGGTAGCACAGATGTTAGGAATTCTCCTTTAACTTCCATGCTGTTGTTTTTCAG .....(((((((..(((((..((.(((((((....))))..))).))..)))))..))))).)). (-17.90)	43	1	1.5	2	987
Tnfrsf4 (4)	TTGTGGGTGGAAGTCTTGGCAGAACTGAAGATGGCTCAGTGCAACTTCCAACACTGTCTCGTCCCACAG .(((((((((((((.((((.((.(((((.......)))))....)).)))).))).)).)).)))))). (-23.00)	20	13	3	2	425
Trabd (2)	CTGTGGGGTGAGGCCGCAGGCGAGTGCTTGAACACTTACTTGAGCTCTCCCTCTGCAG (((..(((.(((((..((((..((((......))))..)))).)).))).)))..))) (-25.30)	1	0	30	99	308
Trf (9)	AGTCTAAAAGGGCAGGTGGCACAGGAAATAGCAACTCTTCATTTGCTGTGTCTTCCTGTGTCTTTGCAG ...........(((((.(((((((((((((((((........)))))))...))))))))))))))).. (-27.00)	36	13	26	24	1000
Trip6 (5)	GGTGGAGACAGGGAGGAGACAGAGGATCTGCTGTTGTGGGTCTGTGGAGGCTGATCTCGTTCCTCTCTGTCCTCAG ..((..((((((((((((.....((((((((....))))))))...((((....)))).))))))))))))..)). (-33.80)	14.33	12	8	20	96
Trpc4ap (18)	CCCACCCTGAGTGACAGTGGGAGGACACTGGCGTGTGTGAGCCCCGTCCTCTACTAAGCACAGCCCAACCCTCTCGCTTTCACTCAG ......((((((((.(((((((((.....(((.((((((((.......)))......))))))))....))))))))).)))))))) (-36.80)	9	6	6	16	95
Trpm4 (19)	TTGGGGAGGGGACAAGTTCCCAAGTGGTCCTGCCCTTTGACTCCTGGGACTTGGCCCTGCAG .......((((.((((.((((.((..(((.........)))..)))))))))).)))).... (-22.30)	16	3	23	14	208
Ttc35 (3)	ATTATTTTGAAGATGTAATGGTGGTTGCTCAAGTCGTTATTTTGTTTAACCCATTATGTTTTCAG .......(((((((((((((..(((((..((((.......))))..)))))))))))))))))). (-18.30)	11	4	8	2	359
Ttn (13)	TGTCCCTGGGAGGAGGTGTCCAAGTGTAACTTTGACATTATCAACTACTCACTTGGAAAACCTTGTCTCCAG .....((((((.(((((.((((((((.....((((.....)))).....))))))))..))))).)).)))) (-28.30)	28	9	0	9	9386
Tubgcp2 (8)	TGTGGCCACACCAGAGTTGTCTGGGCTTGTGCTGTAGTGGCCTGAAACTCTGTGTGACTTACAG (((((.((((.(((((((.((.(((((...((....)))))))))))))))))))).)).))). (-22.50)	8	9	28	5	691
Uba7 (11)	GTGAGCTGGGGGATGCTAGTGGGGAATGTCTTTGGGAAATCCACACCACATGCTCTGGCTAAGACTGT ...(((..(((.(((...(((.(((...((.....))..))).)))..))).)))..)))........ (-21.40)	5	4	103	29	80
Ube2o (6)	CTCTGGGAGGATGTCAGAGCAGACCACAGACATGAGGCCTCCTCCTGTGACTCCTTCTAG ..(((((((((.(((((((.((.((.((....)).)).)).)))...))))))))))))) (-22.80)	17.5	5	5	24	951
Ube2q1 (4)	GGGGCTCTGGGACAAGTGGACTGAGGAAAAGTCTATCCACTACTTTTGTGGTAACATTCCTTTGCACTCCTGCCTCAGGATACAGA (((((...((((...(((....((((((..((....((((.......))))..)).))))))..)))))))))))).......... (-23.40)	130.5	28	0.5	4	2147
Ubr4 (15)	TTCCCTGGCATGTGTTGGGGGTGGGACTGAAAGATTACTCTTCTTTCCCCTCCTGTCACCTGCAG .......(((.(((.((((((.((((..((.(((....)))))..)))))))))).))).))).. (-24.30)	5	0	27.25	105	333
Usp10 (11)	CCCACAGGGTGCAGCTGTAGCCAGGCAGGCAGCCTGTGACCCTGGCTACTCTGTCCCAGGTTGAGG ......(((.((((..(((((((((((((...))))....))))))))).)))))))......... (-29.40)	157	62	0	13	1443
Vars2 (21)	GGAGGTGGAGAGAGGGTAGAGCCAGGAGCATCAATGCCCAGTTTCTCTGCTGACTCTGCGTTTCTTCATCAG ...((((((((((..((((((.(((..(((....))).(((.....)))))).)))))).)))))))))).. (-25.00)	22	18	9	1	813
Vps16 (11)	GTCCCATGAGGCTGGGGACCAGAGTGAGACTGTCTGTGTAATGTTCCATCTCTGGGCCTCTCCCCACAG ......((.((..((((.((((((((..((............))..)).)))))).))))..))))... (-22.40)	26	15	11	11	313
Vps16 (6)	GTGAGAACCTAAGTGGGAATGAAATGGAAGGGCTGGTCAACAAGTAGGAAGGC .......((((..((....(((...((.....))..))).))..))))..... (-6.90)	1	0	167	39	98
Vps33b (15)	CTGCCTGAGCAGGAAGAAGAGAAGACATGCATCCTGAAATGTCAGTCCTCTTGACTCTTCCTTCCTGTGCAG ((((....(((((((((((((((((..(((((......))).))....))))..)))))).))))))))))) (-23.50)	10	1	8	27	112
Wbp7 (4)	GTGAGTTGAGGGCAGCATAGCAGAGGGGAAGAGTGTTCATACCCCATCCTGA ....((((....))))....(((.((((.............))))...))). (-9.82)	46	8	1	0	72
Wdr91 (12)	GTCACAGAGGGTAAGGGGACCCTGCTATGCCCTGTGACCTTAACAGGTGTGGCCTTGCTCTCTCAG .....((((((((((........((((((.(((((.......)))))))))))))))))))))... (-23.40)	60	71	5	7	629
Wiz (4)	CTCCTTCTTGGGGTGGACAGCCTGACTCATGAGTGGGCTGAGCCTGTCTCCTCCACCCCACAG ........(((((((((((((((.(((....)))))))))...........)))))))))... (-26.80)	229	66	1	10	4860
Wtap (6)	TTGTGAGCAAAGGCTAGAGAGAGCTTTGTCTTCATCTTGTGATGATAGGCTCTTTCCTTTGCAG ......(((((((....(((((((((.....(((((....))))).)))))))))))))))).. (-25.50)	13	2	20	37	5736
Wwc1 (9)	CCGTTTTTGGGAGCTGGAGCACTGCAGCCCTTTGGAGTGTTACTGTCTTGCCTCCTCTCCCTCAG ........(((((..((((((..((((...............))))..))).))).))))).... (-18.96)	51	26	0	6	6629
X99384 (8)	GTGGCTGATGGGTGGCAACGGGCTGTGTTGCGGTCTCTGATTACACTCCCGATTCTCACTTTATCAG ....(((((((((((.((((((..((((..(((...)))...)))).)))).)).)))))).))))) (-21.70)	20	18	3	1	285
Zc3h7b (3)	CTCAGGGCAGAGGGCTGGGACTGAGCCAGGCTGGATGGAGACCCGCTTAGTCCCCTCGGACCTGCCTTGCGCAG ..((((((((.(((..((((((((((..((((......)).)).)))))))))))))....))))))))..... (-34.00)	6.5	1	20	6	117
Zcchc6 (11)	GTGGTAATGGGGTGACTGCAAGCTGAGTAGAAACACCCTTCAGAGTGCTCTCTCCCTCTAG ........((((.((..(((..(((((...........)))))..)))..)).)))).... (-17.20)	68	15	3	1	322
Zfp384 (5)	ATGGTCTGGGGAAATGAGGTGGATGACTGTCAGATGAACAGCGTGACCCCATCTCCCTTTTCTCCCAACCCCAG ..(((..(((((((.((((((((((.(((((....)).))))))....)))))))...)))))))..))).... (-25.40)	51	18	1	4	193
Zswim4 (13)	GTAGGGTGGGAAGGGAAAGGGCAGGGTCTGGCTGCACAGATACACACTCTGCCCTCTCCCCACACCCAG ...(((((....((((.((((((((((.((.((....))...)).)))))))))).))))..))))).. (-37.90)	14.5	17.5	2	37	1217

## Sheet: Mouse mirtron candidate
Gene (Intron)	Fold; ΔG (kcal/mol)	5p reads		3p reads		Intron length
		Perfect	Tailed	Perfect	Tailed
Mouse mirtron candidate
8430427H17Rik (4)	GTGAGCACCAGGCAGGGCTGGTGGGACACCGATGGGTCTAAGGCAGGGCCAGTCCTCTCCCATAGCCTGTGTCTCCCCAG .........((((((((((.((((((....(((.(((((......))))).)))...))))))))))).)))))...... (-29.30)	86	46	19	11	80
Abca2 (33)	GTGAGTGAGGCAGACCAAGTTGAGGAGGGGCAGGACCACCTCGTCCTGACACCTCCTGGAACTGAGTGCTGTCCCCTTCTAG ..(((...(((((((((..((.((((((..((((((......))))))...)))))).))..)).)).)))))...)))... (-33.10)	53	5	7	6	82
Acadvl (12)	GTGAGGACCCAGGTGTGATGGGAGGGCGGAGTCCAGATTAGGACCTCAGCTCAAAAATCCAACTCATCTGGTTCTCTGTCCTCAG .((((((((((((((...((((.((((.((((((......)))).)).)))).....))))...)))))))......))))))). (-34.60)	28	17.5	18	51	85
Cad (20)	GTGGGCTGGGGTCTGGCAGGAAGCCGCGGGGCGGATGTCGCTTGTGGGTGAGTGTGAGCACCCCACTGACCCTCCTGTCCCTGCAG ((((((.((((((.((((....(((....)))...))))....(((((...(((....)))))))).))))))...))))..)).. (-34.50)	7	1	20	7	86
Dda1 (2)	GTGAGTGTGGGGCTGGGGGTGGCGTCACTGTCCTGAGGATGAGGGTTGCCAGCTAACCCACCGCTCCCCATCCACAG .....((((((...((((((((((((.((......)))))).((((((.....)))))).))))))))..)))))). (-32.80)	5.33	2.33	48	120	77
Ehbp1l1 (14)	GTAAGGAGAGTTAGGTGGGCAGAGTTGGTGTGGTACTTTCTGAGCTGGCCTGGGGTGAGCTCACCTGTCCTCTGCCTCCTTCCTTCCCCTTCTAG ....((..((..(((.((((((((..(((............(((((.(((...))).))))))))....)))))))))))..))..))....... (-36.10)	281	149	0	4	95
Fbl (2)	GTAAGTGAGGTTGACATGGGGGTTGGAGCAGGTTCTCGAAGGATGAAGGGAGGGAAGATGTGGGGGCCTCCCTCTCCTACTGCAGCTCTCTCTTACAG (((((.(((((((.((.(((..((......))..)))..((((.((.((((((.............))))))))))))..)))))).))).))))).. (-35.62)	14	0	6	30	98
Gtf2f1 (10)	GTAAGTCAGAGCTGGGGGCTTGAGTAGGGCCAGTCTGAGCCTTCACACTCATACCCTAATCTCTGCAG ......(((((...((((..((((((((((((...)).)))))...)))))..))))...)))))... (-24.90)	15.75	7	83	420	68
Hectd3 (5)	GTGAGTGGGCTCTGGGCATGACAGGGTGGATGAGCCATGTGCTGCGGGTGCCTAGAGACTCATTCAGATACATACTCTGGGTCCTCAG .((((((((((((((((((..(((.((((.....))))...)))...)))))))))).))))))))..........((((....)))) (-33.80)	31	17	12	2	88
Itgal (10)	GTGCACAGGAGGAGCTGAGGGGTGCTGAGGGATCTAACTGACTCAGCTGGCTCGGGATAGCACTCACCCTAGTCCTCTCCTTCCCTGAGCAG .(((.((((.((((..((((((.((((((............))))))..(((.(((..........))).))))))))))))))))).))). (-35.70)	12	11	50	155	92
Med29 (3)	CCAGGTTGGGGGGAGAGGAGGCTGCATCCAGGAAAGTGATGCTGTTGTTCTCTTTTCCACAG ......((((..((((((((((.(((((.........))))).))).)))))))..)).)). (-22.40)	6	3	28.5	20	3787
Myo1c (16)	GTGAGGGAGACAGGCGAACTGGGGTGGGGTGGGTACCCACAGCTCTGTGTGCATCTCTGACTTTATGCTCAACCCTGACCTGTCTTCTGCCTCACAG ((((((((((((((((....(((((...((((....)))).))))).((.((((..........)))).))....)).))))))))...)))))).. (-37.50)	2	6	62	25	97
Plxnb1 (22)	TGGGCAGGACCTGGGCTAGGTTGGGCATCGTGCTATCTGGGACCCTGGCTCACAGGTAGCTTCCCACGCAG ((((.((.((((((((((((((.(((.....)))......)))).)))))..)))))..)).))))..... (-24.90)	5	0	37	14	76
Supt5h (14)	GTGAGCCATGGCGTGTGCAGAGGCAGGGGCTGTGGTGGAGGAAGTCCCATACTTCTGACTGCCATTCCTTACAG (((((..((((((.((.((((((..((((((...........))))))...))))))))))))))..))))).. (-31.30)	28	3	3	16	74
Supt6h (14)	GTGGGCATGCAGTAGTGGACCAGCAGGAGGGGTGACCCGGATGAGACACCCTCATCCTGCAGCTCCACTGTTGTCCCCACAG (((((...(((((((((((...(((((.(((....)))..(((((.....))))))))))...))))))))))).))))).. (-42.50)	535	71	15.5	121	82
Syvn1 (10)	GTGGGAGAAGGTCTGGGAGACCTGCATCGTGGGCACAGGCTCATGGGGACCTGCTGACCGCTGCCTGATCTTACTCCCAG .((((((((((((.((....)).(((..((((.((((((((.....)).)))).)).)))))))..)))))).)))))). (-37.10)	643.1	318.1	4.5	37	80
Tpm2 (3)	GTGAGGAAGGGGGCCCAGAAGTAAGGCAGGGTAGGGACTGCAGAGGGAGGGACCCCATCTCTGCTGGCACTGGCCCCACACGCACTTCTGTCCCTGCTTCTCAGAGGAAT .(((.((((.(((..(((((((......((((.((..(((((((((..((....)).))))))).))..)).)))).......)))))))..))).)))))))....... (-45.32)	15	3	5	19	104
Vps13d (4)	GCAAGGCATAGAGCCTCTGTGCTTTAGGGGCTCCTGTGACATCCCCAACGGTGAAGCACTGGCCTCTGCTGACACTGGCTCTTTCCCTTGCAG ((((((...((((((...(((...((((((((..(((..((((......))))..)))..))))))))....))).))))))...)))))).. (-41.70)	54	6	26	41.5	93
