# Supplementary material
Source: HighWire-hosted journal article supplement (https://genome.cshlp.org/content/suppl/2012/08/22/22.9.1634)
Supplement: Supp_TableS6_Intron_vs_negative.xlsx [file Supp_TableS6_Intron_vs_negative.xlsx]

## Sheet: Mouse
mm9 Criteria	# true introns removed	# true introns remaining	# mirtron candidates removed	# shifted-introns removed	# shifted-introns remaining
Read in 52220 introns
Read in 153004 5p-intron sequences
Read in 153004 3p intron sequences
358228 total intron sequences		358228			358228
Filter (< 20 reads in region and hap chromosome)	347834	10394		338088	20140
Repeat loci (Genome hit > 20 times or strand all the same letter)	667	9727		753	19387
Contains Mature and Star read	567	9160	1	4098	15288
Min dist splice site <= 13	4304	4856		3470	11818
Mature length <= 25 nt	1231	3625	6	5242	6576
Mature length >= 18 nt	133	3492		717	5859
Mature Genome hits < 10	1	3491		7	5852
Star Genome hits < 10	10	3481		38	5814
Star length <= 26 nt	415	3066	9	1110	4704
Star length >= 18	89	2977		197	4507
Either Mature or Star Arm >= 15 reads (11 like window)	1084	1893	2	1759	2748
Star reads >= 3 (11 like window)	510	1383	19	1205	1543
B.P. >=10	725	658	4	1391	152
Mature like 11 vs 5' Mature 11 >= 85%	52	606	14	92	60
Mature + Star Reads >= 50	168	438	70	27	33
B.P. >= 13	30	408	30	19	14
Total		408	155		14
Duplicates (same reads mapped to non-identical intron annotations)		30			1
Negative		60			10
Candidate 3p tail mirtron		1
Candidate 5p tail mirtron		76			1		1. 5p tailed mirtron candidate
Candidate conventional mirtron		3
Confident/novel 3p tail mirtron		3			1
Confident/novel 5p tail mirtron		188			1
Confident/novel conventional mirtron		13
Mirbase 3p tail mirtron		0
Mirbase 5p tail mirtron		11
Mirbase conventional mirtron		9
Mirbase reclassified 3p tail mirtron		1
Mirbase reclassified 5p tail mirtron		9
Mirbase reclassified conventional mirtron		0
Known miRbase canonical miRNA		4					mmu-mir-3062	mmu-mir-369	mmu-mir-670	mmu-mir-328
mm9	not-mirtron	mirtron	Total
shifted-intron	358227	1	358228
intron	357994	234	358228
false positive rate	2.79152e-06
specificity	0.999997
FDR	0.00425532

## Sheet: Human
hg19 Criteria	# true introns removed	# true introns remaining	# mirtron candidates removed	# shifted-introns removed	# shifted-introns remaining
Read in 63107 intron sequences
Read in 195130 5p-intron sequences
Read in 195130 3p-intron sequences
453367 total intron sequences		453367			453367
Filtering introns with >= 20 sense reads and not hap chromosome	445063	8304		437395	15972
Repeat Loci, those which have all same or mature/star reads > 20 hits	15	8289		57	15915
Contains Mature and Star read	965	7324	5	4567	11348
Min dist splice site <= 13	3628	3696	3	3307	8041
Mature length <= 25 nt	397	3299	3	733	7308
Mature length >= 18 nt	166	3133		477	6831
Mature Genome hits < 10	6	3127		17	6814
Star Genome hits < 10	7	3120		34	6780
Star length <= 26 nt	238	2882	3	627	6153
Star length >= 18	1	2881		268	5885
Either Mature or Star Arm >= 15 reads (11 like window)	894	1987	10	1856	4029
Star reads >= 3 (11 like window)	396	1591	50	1273	2756
B.P. >=10	1001	590	4	2525	231
Mature like 11 vs 5' Mature 11 >= 85%	45	545	7	116	115
Mature + Star Reads >= 50	157	388	82	59	56
B.P. >= 13	34	354	22	14	42
Total		354	189		42
Duplicates (same reads mapped to non-identical intron annotations)		59			9
Negatives		14			32
Candidate 3p tail mirtron		2
Candidate 5p tail mirtron		42
Candidate conventional mirtron		2
Candidate shRNA		4
Confident/novel 3p tail mirtron		7
Confident/novel 5p tail mirtron		157			1	shRNA candidate
Confident/novel conventional mirtron		9
Mirbase 3p tail mirtron		2
Mirbase 5p tail mirtron		31
Mirbase conventional mirtron		8
Mirbase reclassified 3p tail mirtron		5
Mirbase reclassified 5p tail mirtron		8
Mirbase reclassified conventional mirtron
known Mirbase canonical miRNA		4				hsa-mir-4695	hsa-mir-133a-2	hsa-mir-943	hsa-mir-4668
hg19	not-mirtron	mirtron	Total
shifted-intron	358227	1	358228
intron	357994	227	358221
false positive rate	2.79152e-06
specificity	0.999997
FDR	0.00438596
