# Supplementary material
Source: HighWire-hosted journal article supplement (https://genome.cshlp.org/content/suppl/2012/08/22/22.9.1634)
Supplement: Supp_TableS7_mammalian_by_locus.xlsx [file Supp_TableS7_mammalian_by_locus.xlsx]

## Sheet: human miRNAs
Locus	Species	Type	Total	Perfect miRNA/star	3' Trimmed miRNA/star
hsa-mir-122	Human	miRNA	60664071	4.22249e+07	1.84392e+07
hsa-mir-21	Human	miRNA	4.88944e+07	4.50623e+07	3832185
hsa-let-7f-2	Human	miRNA	4.84387e+07	4.34108e+07	5.02792e+06
hsa-let-7f-1	Human	miRNA	4.6088e+07	4.10728e+07	5015229
hsa-let-7b	Human	miRNA	30392856	20790817	9602039
hsa-let-7g	Human	miRNA	2.16059e+07	1.96687e+07	1937191
hsa-mir-192	Human	miRNA	1.93703e+07	1.53065e+07	4.0638e+06
hsa-let-7a-3	Human	miRNA	1.86149e+07	1.6441e+07	2.17394e+06
hsa-let-7a-1	Human	miRNA	1.85764e+07	1.63891e+07	2.1873e+06
hsa-let-7a-2	Human	miRNA	1.85067e+07	1.6341e+07	2.16576e+06
hsa-let-7c	Human	miRNA	1.42928e+07	1.20833e+07	2.20951e+06
hsa-mir-29a	Human	miRNA	1.06081e+07	9.68315e+06	924984
hsa-mir-140	Human	miRNA	9.56159e+06	6.07718e+06	3.48441e+06
hsa-mir-30a	Human	miRNA	9299236	8577355	721881
hsa-mir-378	Human	miRNA	7.10821e+06	5.39019e+06	1.71802e+06
hsa-let-7i	Human	miRNA	6554427	4521658	2032769
hsa-mir-103a-2	Human	miRNA	6.40919e+06	5.55631e+06	852882
hsa-mir-103a-1	Human	miRNA	6.24743e+06	5.40566e+06	841772
hsa-mir-143	Human	miRNA	5.86026e+06	4.21217e+06	1648094
hsa-let-7d	Human	miRNA	5666028	5.06344e+06	602590
hsa-mir-191	Human	miRNA	5.62677e+06	5049831	576942
hsa-mir-199b	Human	miRNA	5.35456e+06	4.30453e+06	1050028
hsa-mir-101-2	Human	miRNA	5.2714e+06	4.40352e+06	867873
hsa-mir-199a-2	Human	miRNA	5.25095e+06	4192955	1.058e+06
hsa-mir-199a-1	Human	miRNA	5.25066e+06	4.19272e+06	1057934
hsa-mir-101-1	Human	miRNA	5.18952e+06	4.32435e+06	865163
hsa-mir-30d	Human	miRNA	4823027	4373980	449047
hsa-mir-320a	Human	miRNA	4.70381e+06	3.0867e+06	1.61711e+06
hsa-mir-99a	Human	miRNA	4281426	3563372	718054
hsa-let-7e	Human	miRNA	4.07834e+06	2.95336e+06	1124978
hsa-mir-221	Human	miRNA	3.94871e+06	3.03233e+06	916384
hsa-mir-99b	Human	miRNA	3680492	3403566	276926
hsa-mir-423	Human	miRNA	3096223	2.63033e+06	465892
hsa-mir-26a-2	Human	miRNA	3.03688e+06	2257595	779286
hsa-mir-26a-1	Human	miRNA	3.02742e+06	2.24975e+06	777672
hsa-mir-148a	Human	miRNA	2.91605e+06	2.58894e+06	327116
hsa-mir-17	Human	miRNA	2.8956e+06	2.40615e+06	489455
hsa-mir-25	Human	miRNA	2878277	2554604	323673
hsa-mir-451	Human	miRNA	2645996	2556638	89358
hsa-mir-107	Human	miRNA	2.45609e+06	2.07349e+06	382598
hsa-mir-222	Human	miRNA	2.40705e+06	1.92564e+06	481411
hsa-mir-23a	Human	miRNA	2336870	1.96001e+06	376858
hsa-mir-26b	Human	miRNA	2335629	1.80715e+06	528482
hsa-mir-27a	Human	miRNA	2.31391e+06	1849955	463958
hsa-mir-22	Human	miRNA	2187633	2.03176e+06	155870
hsa-mir-100	Human	miRNA	2.17905e+06	1.42383e+06	755214
hsa-mir-142	Human	miRNA	2.10484e+06	1.78859e+06	316258
hsa-mir-10a	Human	miRNA	2.06322e+06	1.87106e+06	192164
hsa-mir-92a-1	Human	miRNA	2048637	1.69583e+06	352806
hsa-mir-24-2	Human	miRNA	1982356	951897	1030459
hsa-mir-24-1	Human	miRNA	1.94465e+06	915455	1.02919e+06
hsa-mir-185	Human	miRNA	1.91675e+06	1.5473e+06	369449
hsa-mir-30e	Human	miRNA	1.89712e+06	1442228	454892
hsa-mir-16-2	Human	miRNA	1.85351e+06	1.68844e+06	165070
hsa-mir-16-1	Human	miRNA	1.82797e+06	1667563	160407
hsa-mir-92a-2	Human	miRNA	1817099	1.49274e+06	324364
hsa-mir-27b	Human	miRNA	1.81018e+06	1.58348e+06	226696
hsa-mir-145	Human	miRNA	1.77834e+06	1.56303e+06	215312
hsa-mir-182	Human	miRNA	1.75278e+06	1.67571e+06	77074.5
hsa-mir-20a	Human	miRNA	1745498	1.42988e+06	315618
hsa-mir-93	Human	miRNA	1.63462e+06	1.43299e+06	201626
hsa-mir-146b	Human	miRNA	1.37056e+06	1.00662e+06	363936
hsa-mir-128-1	Human	miRNA	1.36156e+06	1249237	112326
hsa-mir-424	Human	miRNA	1359181	1.19647e+06	162712
hsa-mir-186	Human	miRNA	1.34215e+06	1.20522e+06	136926
hsa-mir-181a-1	Human	miRNA	1254862	1022470	232392
hsa-mir-23b	Human	miRNA	1.25442e+06	889434	364984
hsa-mir-181a-2	Human	miRNA	1.24806e+06	1.01647e+06	231583
hsa-mir-29c	Human	miRNA	1.2467e+06	1.10839e+06	138313
hsa-mir-106b	Human	miRNA	1.20815e+06	1.05633e+06	151821
hsa-mir-200c	Human	miRNA	1161717	987885	173832
hsa-mir-151	Human	miRNA	1.0498e+06	671494	378302
hsa-mir-125b-2	Human	miRNA	1.00494e+06	847286	157653
hsa-mir-183	Human	miRNA	995551	907085	88466
hsa-mir-125b-1	Human	miRNA	993114	835638	157476
hsa-mir-141	Human	miRNA	926677	811392	115286
hsa-mir-128-2	Human	miRNA	854150	750135	104016
hsa-mir-340	Human	miRNA	834598	769203	65395.3
hsa-mir-126	Human	miRNA	831145	629186	201959
hsa-mir-148b	Human	miRNA	796900	565732	231168
hsa-mir-15a	Human	miRNA	789066	588322	200744
hsa-mir-10b	Human	miRNA	770195	695230	74965
hsa-mir-15b	Human	miRNA	761410	713859	47551
hsa-mir-146a	Human	miRNA	734474	489960	244514
hsa-mir-18a	Human	miRNA	706432	573132	133300
hsa-mir-196a-2	Human	miRNA	681636	604388	77248.6
hsa-mir-152	Human	miRNA	678776	406147	272630
hsa-mir-7-1	Human	miRNA	663434	627391	36043.7
hsa-mir-19b-1	Human	miRNA	656817	626172	30644.8
hsa-mir-125a	Human	miRNA	646316	604493	41823
hsa-mir-19b-2	Human	miRNA	646240	616641	29598.8
hsa-mir-7-2	Human	miRNA	615907	584567	31339.7
hsa-mir-205	Human	miRNA	614622	536442	78180
hsa-mir-7-3	Human	miRNA	610063	578964	31098.7
hsa-mir-19a	Human	miRNA	605007	577853	27154.5
hsa-mir-1-2	Human	miRNA	598242	556367	41875
hsa-mir-29b-2	Human	miRNA	588646	546345	42301.2
hsa-mir-196a-1	Human	miRNA	586396	517526	68870.6
hsa-mir-1-1	Human	miRNA	586371	544145	42226
hsa-mir-130a	Human	miRNA	570328	491278	79050
hsa-mir-29b-1	Human	miRNA	563340	521110	42230.2
hsa-mir-375	Human	miRNA	547170	450529	96641
hsa-mir-181b-2	Human	miRNA	519843	354131	165712
hsa-mir-342	Human	miRNA	517262	446420	70843
hsa-mir-28	Human	miRNA	501230	362136	139094
hsa-mir-200b	Human	miRNA	480342	356233	124109
hsa-mir-425	Human	miRNA	479894	427663	52231
hsa-mir-483	Human	miRNA	474419	342046	132374
hsa-mir-374a	Human	miRNA	453636	415782	37854.5
hsa-mir-196b	Human	miRNA	444784	321497	123287
hsa-mir-130b	Human	miRNA	438199	367629	70569.8
hsa-mir-452	Human	miRNA	427573	394401	33172
hsa-mir-181b-1	Human	miRNA	421784	281902	139882
hsa-mir-127	Human	miRNA	408964	190691	218273
hsa-mir-200a	Human	miRNA	407068	337482	69586
hsa-mir-30c-2	Human	miRNA	391647	351705	39942.5
hsa-mir-155	Human	miRNA	387154	320301	66853
hsa-mir-195	Human	miRNA	370563	250358	120206
hsa-mir-30b	Human	miRNA	369660	336368	33292
hsa-mir-1307	Human	miRNA	367506	297292	70214
hsa-mir-503	Human	miRNA	347867	256941	90926
hsa-mir-92b	Human	miRNA	337728	204231	133496
hsa-mir-374b	Human	miRNA	336619	292629	43990.5
hsa-mir-744	Human	miRNA	335580	251918	83662
hsa-mir-31	Human	miRNA	318542	273610	44932
hsa-mir-193a	Human	miRNA	318194	267874	50320
hsa-mir-34c	Human	miRNA	311657	278673	32984
hsa-mir-33a	Human	miRNA	307358	276454	30904
hsa-mir-98	Human	miRNA	306134	248846	57288
hsa-mir-30c-1	Human	miRNA	294930	259733	35197
hsa-mir-124-2	Human	miRNA	294435	215613	78821.8
hsa-mir-124-1	Human	miRNA	294381	215549	78832.3
hsa-mir-124-3	Human	miRNA	294338	215523	78814.8
hsa-mir-330	Human	miRNA	290044	229730	60313.8
hsa-mir-193b	Human	miRNA	278950	231412	47538
hsa-mir-219-2	Human	miRNA	275618	224351	51267.5
hsa-mir-9-1	Human	miRNA	271578	240070	31508.5
hsa-mir-9-2	Human	miRNA	271446	239944	31501.5
hsa-mir-335	Human	miRNA	262489	236865	25623.5
hsa-mir-4521	Human	miRNA	261475	255591	5884
hsa-mir-9-3	Human	miRNA	256709	225235	31474
hsa-mir-203	Human	miRNA	253633	190533	63100
hsa-mir-455	Human	miRNA	252656	185784	66872
hsa-mir-223	Human	miRNA	236953	173914	63039.5
hsa-mir-497	Human	miRNA	223287	185860	37427
hsa-mir-181d	Human	miRNA	221590	138049	83541
hsa-mir-363	Human	miRNA	204934	170840	34093
hsa-mir-361	Human	miRNA	202919	134484	68435.1
hsa-mir-96	Human	miRNA	193741	184374	9367.5
hsa-mir-224	Human	miRNA	183183	169629	13554
hsa-mir-486	Human	miRNA	182731	131402	51328.5
hsa-mir-331	Human	miRNA	182273	110517	71756.8
hsa-mir-139	Human	miRNA	181906	142751	39155
hsa-mir-499	Human	miRNA	180675	175138	5537.5
hsa-mir-210	Human	miRNA	175498	133972	41526.5
hsa-mir-150	Human	miRNA	168176	121450	46726
hsa-mir-194-2	Human	miRNA	166633	143068	23564.8
hsa-mir-34a	Human	miRNA	166594	128829	37765
hsa-mir-214	Human	miRNA	156264	63867.1	92396.8
hsa-mir-301a	Human	miRNA	154320	139171	15149
hsa-mir-485	Human	miRNA	147697	122524	25173
hsa-mir-137	Human	miRNA	145655	131207	14448
hsa-mir-532	Human	miRNA	142027	123963	18064
hsa-mir-144	Human	miRNA	141411	131804	9607
hsa-mir-708	Human	miRNA	133105	98200.8	34903.8
hsa-mir-590	Human	miRNA	124658	115578	9079.67
hsa-mir-184	Human	miRNA	119991	86760	33231
hsa-mir-32	Human	miRNA	119978	109435	10543
hsa-mir-218-1	Human	miRNA	119776	83663.5	36113
hsa-mir-320b-2	Human	miRNA	116145	87710.2	28434.5
hsa-mir-138-1	Human	miRNA	115519	96483.7	19035.5
hsa-mir-320b-1	Human	miRNA	114649	86553.9	28095.5
hsa-mir-324	Human	miRNA	110240	74325.1	35914.8
hsa-mir-365-1	Human	miRNA	109049	96667.9	12380.8
hsa-mir-432	Human	miRNA	107428	71375.3	36053
hsa-mir-365-2	Human	miRNA	106920	90966.5	15953.8
hsa-mir-218-2	Human	miRNA	106836	75131.5	31704
hsa-mir-382	Human	miRNA	105352	97695	7657
hsa-mir-216a	Human	miRNA	102398	85223.3	17175
hsa-mir-652	Human	miRNA	102060	49841.5	52218
hsa-mir-539	Human	miRNA	101091	96934.8	4156
hsa-mir-345	Human	miRNA	100680	51984.4	48695.3
hsa-mir-411	Human	miRNA	99146	91000	8146
hsa-mir-378c	Human	miRNA	98673.7	79260.4	19413.3
hsa-mir-339	Human	miRNA	96221.2	67724.3	28496.8
hsa-mir-542	Human	miRNA	93609.5	85330.5	8279
hsa-mir-574	Human	miRNA	90871.4	71967.4	18904
hsa-mir-598	Human	miRNA	87037.3	80338.8	6698.5
hsa-mir-454	Human	miRNA	86972	77456	9516
hsa-mir-429	Human	miRNA	86193	79772	6421
hsa-mir-629	Human	miRNA	85742.5	76295.5	9447
hsa-mir-484	Human	miRNA	85302.9	58385.4	26917.5
hsa-mir-378b	Human	miRNA	84397.6	313.09	84084.5
hsa-mir-664	Human	miRNA	83222.8	73880.8	9342
hsa-mir-582	Human	miRNA	82302	79486	2816
hsa-mir-421	Human	miRNA	78628.4	62777.2	15851.2
hsa-mir-660	Human	miRNA	77351.5	71620.5	5731
hsa-mir-135b	Human	miRNA	73594.4	57120.4	16474
hsa-mir-181c	Human	miRNA	73558	64000	9558
hsa-mir-379	Human	miRNA	70029	39293	30736
hsa-mir-433	Human	miRNA	69326	56053	13273
hsa-mir-138-2	Human	miRNA	69026.2	54486.7	14539.5
hsa-mir-95	Human	miRNA	65660.7	55936.9	9723.81
hsa-mir-383	Human	miRNA	62997.5	52695.5	10302
hsa-mir-215	Human	miRNA	62389.5	40912	21477.5
hsa-mir-323	Human	miRNA	61501	56691	4810
hsa-mir-132	Human	miRNA	60698.5	40688.5	20010
hsa-mir-197	Human	miRNA	56787.2	49058.2	7729
hsa-mir-495	Human	miRNA	56245	51518	4727
hsa-mir-409	Human	miRNA	55612	51068	4544
hsa-mir-449c	Human	miRNA	55435.5	52558.5	2877
hsa-mir-505	Human	miRNA	55185.8	50087.2	5098.5
hsa-mir-671	Human	miRNA	54115.4	35078.3	19037.1
hsa-mir-129-2	Human	miRNA	53984.7	48340.3	5644.33
hsa-mir-509-3	Human	miRNA	53678.7	49894.3	3784.33
hsa-mir-194-1	Human	miRNA	53243.3	47643.5	5599.83
hsa-mir-106a	Human	miRNA	50980.5	39856.5	11124
hsa-mir-134	Human	miRNA	50620	23402	27218
hsa-mir-500a	Human	miRNA	50617.1	44291.6	6325.5
hsa-mir-301b	Human	miRNA	50274.2	41137.2	9137
hsa-mir-211	Human	miRNA	49198.5	42752.2	6446.33
hsa-mir-320c-1	Human	miRNA	48401.4	31320.9	17080.5
hsa-mir-502	Human	miRNA	46992.8	40574.3	6418.5
hsa-mir-376c	Human	miRNA	46469	43358	3111
hsa-mir-888	Human	miRNA	46357	43811	2546
hsa-mir-33b	Human	miRNA	44528.5	37373.5	7155
hsa-mir-320c-2	Human	miRNA	44439.3	32376.2	12063.1
hsa-mir-217	Human	miRNA	42873	12161	30712
hsa-mir-769	Human	miRNA	41472.1	29520.1	11952
hsa-mir-889	Human	miRNA	39860	37906	1954
hsa-mir-362	Human	miRNA	39623	35111	4512
hsa-mir-877	Human	mirtron	38944.6	20459.6	18485
hsa-mir-487b	Human	miRNA	36138	34020	2118
hsa-mir-136	Human	miRNA	35877.2	28750	7127.17
hsa-mir-1301	Human	miRNA	35409.8	24283.8	11126
hsa-mir-338	Human	miRNA	34196.2	30074.2	4122
hsa-mir-543	Human	miRNA	33935	30911	3024
hsa-mir-1269	Human	miRNA	32332.5	23026.8	9305.64
hsa-mir-577	Human	miRNA	31787.8	21469.8	10318
hsa-mir-3676	Human	miRNA	31334.8	11405	19929.9
hsa-mir-212	Human	miRNA	30033.3	22576.3	7457
hsa-mir-20b	Human	miRNA	29803.3	24188.5	5614.83
hsa-mir-1248	Human	miRNA	29377.4	28998.9	378.5
hsa-mir-1277	Human	miRNA	29022.3	28286.9	735.39
hsa-mir-584	Human	miRNA	28878.4	22936.7	5941.67
hsa-mir-3065	Human	miRNA	28703.8	25387.3	3316.5
hsa-mir-508	Human	miRNA	28577	23445	5132
hsa-mir-548e	Human	miRNA	27411.2	24514.2	2897
hsa-mir-3647	Human	miRNA	27375.6	27050.7	324.83
hsa-mir-204	Human	miRNA	27311	23928.9	3382.17
hsa-mir-2110	Human	miRNA	27129	20612	6517
hsa-mir-3607	Human	miRNA	26350.8	26093.8	257
hsa-mir-450a-2	Human	miRNA	25820	23295	2525
hsa-mir-149	Human	miRNA	25804.7	22131.4	3673.33
hsa-mir-551b	Human	miRNA	25766	8382	17384
hsa-mir-369	Human	miRNA	24210	23164	1046
hsa-mir-378d-2	Human	miRNA	23886.6	12385	11501.6
hsa-mir-378d-1	Human	miRNA	23856.6	11719.7	12136.9
hsa-mir-766	Human	miRNA	23805.5	17637	6168.5
hsa-mir-129-1	Human	miRNA	23384.7	18535.3	4849.33
hsa-mir-18b	Human	miRNA	22876	20865	2011
hsa-mir-885	Human	miRNA	22678.8	14684	7994.83
hsa-mir-873	Human	miRNA	22464	19064	3400
hsa-mir-187	Human	miRNA	22422.5	9522.5	12900
hsa-mir-1246	Human	miRNA	22250.3	14565.2	7685.02
hsa-mir-501	Human	miRNA	22129.5	18394.5	3735
hsa-mir-4532	Human	miRNA	21892	3889	18003
hsa-mir-190	Human	miRNA	21773.8	17876.8	3897
hsa-mir-944	Human	miRNA	21308	15437	5871
hsa-mir-493	Human	miRNA	21032.9	16749.4	4283.5
hsa-mir-450a-1	Human	miRNA	20861.3	18596.3	2265
hsa-mir-628	Human	miRNA	20664	15143	5521
hsa-mir-3928	Human	miRNA	20174.5	13705.5	6469
hsa-mir-302b	Human	miRNA	19811.2	17823.7	1987.5
hsa-mir-190b	Human	miRNA	19516.8	15589.8	3927
hsa-mir-296	Human	miRNA	19287.3	14643.3	4644
hsa-mir-767	Human	miRNA	19193	17635	1558
hsa-mir-302d	Human	miRNA	18770.7	17929.7	841
hsa-mir-3591	Human	miRNA	18225	16085	2140
hsa-mir-135a-2	Human	miRNA	18051.4	14220.1	3831.25
hsa-mir-105-2	Human	miRNA	17972.3	14927.5	3044.83
hsa-mir-105-1	Human	miRNA	17934.3	14900.5	3033.83
hsa-mir-589	Human	miRNA	17671.7	15007.7	2664
hsa-mir-410	Human	miRNA	17594.2	15355.2	2239
hsa-mir-625	Human	miRNA	17544.8	13972.8	3572
hsa-mir-760	Human	miRNA	17457.3	6637.33	10820
hsa-mir-1271	Human	miRNA	16805.8	13624	3181.8
hsa-mir-488	Human	miRNA	16415	14303.5	2111.5
hsa-mir-509-1	Human	miRNA	16171	14445.7	1725.33
hsa-mir-509-2	Human	miRNA	16171	14445.7	1725.33
hsa-mir-377	Human	miRNA	15777.8	14505.8	1272
hsa-mir-489	Human	miRNA	15600	14043	1557
hsa-mir-450b	Human	miRNA	15571.7	13650.7	1921
hsa-mir-153-2	Human	miRNA	15536.8	14523.8	1013
hsa-mir-154	Human	miRNA	15371	14591	780
hsa-mir-153-1	Human	miRNA	15309.2	14378.2	931
hsa-mir-874	Human	miRNA	15159	11018	4141
hsa-mir-449a	Human	miRNA	14989.2	13304.7	1684.5
hsa-mir-615	Human	miRNA	14945.8	11075.8	3870
hsa-mir-3615	Human	miRNA	14478	9416	5062
hsa-mir-323b	Human	miRNA	14448	13550	898
hsa-mir-188	Human	miRNA	13964.5	7700.5	6264
hsa-mir-494	Human	miRNA	13536	12632	904
hsa-mir-449b	Human	miRNA	13296.8	12186.8	1110
hsa-mir-34b	Human	miRNA	13251.8	12273.8	978
hsa-mir-548k	Human	miRNA	13199.9	12490.7	709.23
hsa-mir-133a-1	Human	miRNA	12672.9	11611.6	1061.33
hsa-mir-504	Human	miRNA	12671.8	10902.8	1769
hsa-mir-133a-2	Human	miRNA	12663.9	11602.6	1061.33
hsa-mir-1255a	Human	miRNA	12651.8	11759.4	892.33
hsa-mir-941-3	Human	miRNA	12578.1	10098.6	2479.52
hsa-mir-941-4	Human	miRNA	12573.9	10096.5	2477.42
hsa-mir-1180	Human	miRNA	12455	9745	2710
hsa-mir-1262	Human	miRNA	12228	10429	1799
hsa-mir-641	Human	miRNA	12217.5	11058.5	1159
hsa-mir-219-1	Human	miRNA	12152.8	11050.3	1102.5
hsa-mir-328	Human	miRNA	11636.9	6449.4	5187.5
hsa-mir-1278	Human	miRNA	11600.5	10842	758.5
hsa-mir-1306	Human	miRNA	11495	6688	4807
hsa-mir-3613	Human	miRNA	11407.1	10269.9	1137.25
hsa-mir-135a-1	Human	miRNA	11268.9	8273.62	2995.25
hsa-mir-299	Human	miRNA	11229	10141	1088
hsa-mir-654	Human	miRNA	11124.2	6228.75	4895.5
hsa-mir-548b	Human	miRNA	11035	10571.7	463.28
hsa-mir-151b	Human	miRNA	10764.9	7894	2870.85
hsa-mir-4510	Human	miRNA	10721	1983	8738
hsa-mir-4429	Human	miRNA	10468	120	10348
hsa-mir-208a	Human	miRNA	10429	9404	1025
hsa-mir-887	Human	miRNA	10226	7688	2538
hsa-mir-1291	Human	miRNA	9834.83	9568.83	266
hsa-mir-599	Human	miRNA	9699.5	8361.5	1338
hsa-mir-576	Human	miRNA	9504.47	8788.93	715.54
hsa-mir-376b	Human	miRNA	9502.36	8940.03	562.33
hsa-mir-3934	Human	miRNA	9326.38	6454.55	2871.83
hsa-mir-1185-1	Human	miRNA	9321	8060	1261
hsa-mir-23c	Human	miRNA	9203	1548	7655
hsa-mir-370	Human	miRNA	9026.83	3016.33	6010.5
hsa-mir-320d-1	Human	miRNA	8617.1	6267.81	2349.29
hsa-mir-935	Human	miRNA	8585	7669	916
hsa-mir-320d-2	Human	miRNA	8476.02	6151.09	2324.93
hsa-mir-1247	Human	miRNA	8457	6104	2353
hsa-mir-1260b	Human	miRNA	7995.01	7720.81	274.2
hsa-mir-490	Human	miRNA	7979	6327	1652
hsa-mir-1296	Human	miRNA	7973.75	6103.25	1870.5
hsa-mir-655	Human	miRNA	7754	7181.5	572.5
hsa-mir-147b	Human	miRNA	7732.75	5821.75	1911
hsa-mir-1287	Human	miRNA	7599	5700	1899
hsa-mir-202	Human	miRNA	7565	6815.5	749.5
hsa-mir-381	Human	miRNA	7447.5	6413.5	1034
hsa-mir-3200	Human	miRNA	7360	5963	1397
hsa-mir-720	Human	miRNA	7255.45	7137.55	117.9
hsa-mir-942	Human	miRNA	7226.5	5455	1771.5
hsa-mir-326	Human	miRNA	7051.83	694.83	6357
hsa-mir-1224	Human	mirtron	7026.38	4356.38	2670
hsa-mir-337	Human	miRNA	7011.33	5829.33	1182
hsa-mir-4446	Human	miRNA	6985.78	4318.28	2667.5
hsa-mir-491	Human	miRNA	6897	5276	1621
hsa-mir-1304	Human	miRNA	6895.71	5637.11	1258.6
hsa-mir-1269b	Human	miRNA	6717.75	4853.96	1863.79
hsa-mir-500b	Human	miRNA	6716	5838	878
hsa-mir-940	Human	miRNA	6612.25	2244.25	4368
hsa-mir-941-1	Human	miRNA	6609.83	5287.33	1322.5
hsa-mir-206	Human	miRNA	6593.33	4789.33	1804
hsa-mir-2682	Human	miRNA	6591	4920	1671
hsa-mir-3150b	Human	miRNA	6533	4156	2377
hsa-mir-627	Human	miRNA	6376.33	5371	1005.33
hsa-mir-1292	Human	5p tailed mirtron	6325	4757	1568
hsa-mir-934	Human	miRNA	6324.5	4752.5	1572
hsa-mir-3605	Human	5p tailed mirtron	5931	4809	1122
hsa-mir-675	Human	miRNA	5854.17	3751.17	2103
hsa-mir-302c	Human	miRNA	5580.7	4229.7	1351
hsa-mir-651	Human	miRNA	5502	5008	494
hsa-mir-1185-2	Human	miRNA	5447	4748	699
hsa-mir-2355	Human	miRNA	5443.67	5097.67	346
hsa-mir-548j	Human	miRNA	5382.63	4948.76	433.87
hsa-mir-378g	Human	miRNA	5145.53	201.2	4944.33
hsa-mir-545	Human	miRNA	5097.79	4328.76	769.03
hsa-mir-556	Human	miRNA	5081.5	4478.5	603
hsa-mir-448	Human	miRNA	5046	3222	1824
hsa-mir-1270-1	Human	miRNA	5005.42	4340.92	664.5
hsa-mir-1270-2	Human	miRNA	5005.42	4340.92	664.5
hsa-mir-3653	Human	miRNA	4978.04	4789.54	188.5
hsa-mir-487a	Human	miRNA	4933	4506	427
hsa-mir-216b	Human	miRNA	4628.5	4055.5	573
hsa-mir-511-1	Human	miRNA	4585.39	4070.99	514.4
hsa-mir-511-2	Human	miRNA	4585.39	4070.99	514.4
hsa-mir-3127	Human	miRNA	4548.54	2783.87	1764.67
hsa-mir-618	Human	miRNA	4526.67	4221.67	305
hsa-mir-876	Human	miRNA	4462.25	4218.75	243.5
hsa-mir-4517	Human	miRNA	4455	4349	106
hsa-mir-3691	Human	miRNA	4439	2407	2032
hsa-mir-550a-1	Human	miRNA	4389.17	3501	888.17
hsa-mir-550a-2	Human	miRNA	4388.67	3500.5	888.17
hsa-mir-1276	Human	miRNA	4371	4054	317
hsa-mir-4420	Human	miRNA	4352	4239	113
hsa-mir-378e	Human	miRNA	4302.07	321.93	3980.14
hsa-mir-4488	Human	miRNA	4252.33	2148.83	2103.5
hsa-mir-4425	Human	miRNA	4147.5	3131.5	1016
hsa-mir-378f	Human	miRNA	4123.01	666.61	3456.4
hsa-mir-3158-1	Human	miRNA	4117.5	2942.67	1174.83
hsa-mir-3176	Human	miRNA	4114.3	2910.8	1203.5
hsa-mir-329-1	Human	miRNA	4113.26	2939.93	1173.33
hsa-mir-329-2	Human	miRNA	4112.26	2938.93	1173.33
ATP6V0A1 (19)	Human	5p tailed mirtron	3946	2957	989
hsa-mir-431	Human	miRNA	3914	2879	1035
hsa-mir-3158-2	Human	miRNA	3869.5	2725.67	1143.83
hsa-mir-548x	Human	miRNA	3790.51	3693.34	97.17
hsa-mir-378h	Human	miRNA	3761.33	37.33	3724
hsa-mir-1275	Human	miRNA	3730.5	2346.5	1384
hsa-mir-624	Human	miRNA	3654	3474	180
hsa-mir-376a-1	Human	miRNA	3637.11	3282.28	354.83
hsa-mir-875	Human	miRNA	3593	3087.5	505.5
hsa-mir-3609	Human	miRNA	3588.75	3390.75	198
hsa-mir-570	Human	miRNA	3523.1	3335.15	187.95
hsa-mir-4677	Human	miRNA	3372.33	3210.33	162
hsa-mir-642a	Human	miRNA	3370.67	2044.67	1326
hsa-mir-514-1	Human	miRNA	3216	2866	350
hsa-mir-514-2	Human	miRNA	3215.17	2866.17	349
hsa-mir-514-3	Human	miRNA	3215.17	2866.17	349
hsa-mir-3687	Human	miRNA	3182.75	3014.75	168
hsa-mir-1254	Human	miRNA	3171.65	2158.45	1013.2
hsa-mir-548l	Human	miRNA	3169.89	2676.88	493.01
hsa-mir-513c	Human	miRNA	3159.25	3022.18	137.07
hsa-mir-1254-2	Human	miRNA	3156.77	2148.6	1008.17
hsa-mir-302a	Human	miRNA	3142.2	2386.7	755.5
hsa-mir-548a-3	Human	miRNA	3108.76	2929.53	179.23
hsa-mir-1266	Human	miRNA	3018	1546	1472
hsa-mir-4524	Human	miRNA	2971.5	2226.5	745
hsa-mir-758	Human	miRNA	2883	2431	452
hsa-mir-3614	Human	miRNA	2853.17	2499.17	354
hsa-mir-1249	Human	miRNA	2781	2189	592
hsa-mir-320e	Human	miRNA	2763.06	347.56	2415.5
hsa-mir-548ah	Human	miRNA	2748.66	2583.05	165.61
TOMM40L (1)	Human	5p tailed mirtron	2744	1953	791
hsa-mir-376a-2	Human	miRNA	2730.61	2508.78	221.83
hsa-mir-3648	Human	miRNA	2689.34	2458.09	231.25
hsa-mir-3144	Human	miRNA	2657.5	2516.5	141
hsa-mir-3909	Human	miRNA	2623	1895	728
hsa-mir-561	Human	miRNA	2610	2474	136
RPL8 (0)	Human	3p tailed mirtron	2594	297	2297
hsa-mir-548a-2	Human	miRNA	2477.59	2310.2	167.39
hsa-mir-4741	Human	miRNA	2472	1035	1437
hsa-mir-548a-1	Human	miRNA	2449.07	2280.68	168.39
hsa-mir-1250	Human	miRNA	2438	1864	574
hsa-mir-1908	Human	miRNA	2430.83	1678.33	752.5
hsa-mir-1295	Human	miRNA	2423	2052	371
hsa-mir-3190	Human	miRNA	2397	1369	1028
hsa-mir-653	Human	miRNA	2384.33	2222.83	161.5
hsa-mir-506	Human	miRNA	2370	2205	165
hsa-mir-3129	Human	miRNA	2356	2098	258
hsa-mir-372	Human	miRNA	2334	2153	181
hsa-mir-3664	Human	miRNA	2322.08	1962.08	360
hsa-mir-550a-3	Human	miRNA	2316.84	1949.67	367.17
hsa-mir-4485	Human	miRNA	2308.3	2093.6	214.7
hsa-mir-665	Human	miRNA	2304.7	1291.12	1013.58
hsa-mir-4326	Human	miRNA	2280.45	1768.45	512
hsa-mir-592	Human	miRNA	2257	2084	173
hsa-mir-516a-1	Human	miRNA	2255.93	2148.48	107.45
hsa-mir-516a-2	Human	miRNA	2255.93	2148.48	107.45
hsa-mir-4746	Human	miRNA	2195.33	1885.33	310
hsa-mir-3912	Human	miRNA	2177.5	1971.5	206
hsa-mir-3660	Human	miRNA	2169	1903.5	265.5
hsa-mir-579	Human	miRNA	2160.62	1885.62	275
hsa-mir-3117	Human	miRNA	2149.5	1151.5	998
hsa-mir-656	Human	miRNA	2136	2042	94
hsa-mir-519a-1	Human	miRNA	2123.65	2037.48	86.17
hsa-mir-378i	Human	miRNA	2101.42	200.57	1900.85
hsa-mir-4286	Human	miRNA	2066.62	1886.34	180.28
hsa-mir-519a-2	Human	miRNA	2044.33	1963	81.33
hsa-mir-548o-2	Human	miRNA	2032.67	1931.93	100.74
hsa-mir-1294	Human	miRNA	2009.67	1625.67	384
hsa-mir-3662	Human	miRNA	2008.5	1972.5	36
hsa-mir-4473	Human	miRNA	1983	1798	185
hsa-mir-548o	Human	miRNA	1980.56	1880.16	100.4
hsa-mir-3140	Human	miRNA	1945.93	1556.6	389.33
hsa-mir-3935	Human	miRNA	1938.5	1478.5	460
hsa-mir-2277	Human	miRNA	1911.5	1293.5	618
hsa-mir-3180-1	Human	miRNA	1877.8	580	1297.8
hsa-mir-3180-3	Human	miRNA	1877.8	580	1297.8
hsa-mir-3180-2	Human	miRNA	1876.8	579	1297.8
KRT15 (0)	Human	5p tailed mirtron	1868	596	1272
hsa-mir-1226	Human	mirtron	1849	484	1365
hsa-mir-1293	Human	miRNA	1821	1218	603
hsa-mir-496	Human	miRNA	1814	1565	249
hsa-mir-3138	Human	miRNA	1809.17	697.17	1112
hsa-mir-3180-4	Human	miRNA	1794.7	522.9	1271.8
hsa-mir-3180-5	Human	miRNA	1791.95	520.15	1271.8
hsa-mir-1285-1	Human	miRNA	1788.47	1063.31	725.16
hsa-mir-1252	Human	miRNA	1780.7	1717.2	63.5
hsa-mir-380	Human	miRNA	1765	1560	205
hsa-mir-659	Human	miRNA	1750.5	1451	299.5
hsa-mir-643	Human	miRNA	1704	1421	283
hsa-mir-3187	Human	miRNA	1653	926	727
hsa-mir-412	Human	miRNA	1644	1556	88
hsa-mir-3124	Human	miRNA	1629	1279	350
hsa-mir-4742	Human	5p tailed mirtron	1620.5	1210.5	410
hsa-mir-513a-1	Human	miRNA	1595.58	1463.85	131.73
hsa-mir-3611	Human	miRNA	1595.2	1380.2	215
hsa-mir-513a-2	Human	miRNA	1583.08	1451.85	131.23
hsa-mir-3143	Human	miRNA	1540.5	1450.5	90
hsa-mir-4647	Human	miRNA	1521.83	1244.83	277
hsa-mir-3917	Human	miRNA	1513	1401	112
ULK3 (3)	Human	5p tailed mirtron	1490	1186	304
hsa-mir-3679	Human	miRNA	1486.5	802.25	684.25
hsa-mir-1268b	Human	miRNA	1466.46	1263.76	202.7
hsa-mir-3064	Human	5p tailed mirtron	1464	1136	328
hsa-mir-1251	Human	miRNA	1457.5	1425.5	32
hsa-mir-3192	Human	miRNA	1454	1082	372
ALDH2 (9)	Human	5p tailed mirtron	1449	744	705
NXF1 (18)	Human	5p tailed mirtron	1429	1107	322
hsa-mir-1256	Human	miRNA	1423.77	1303.3	120.47
hsa-mir-1298	Human	miRNA	1418.75	1064.75	354
hsa-mir-371	Human	miRNA	1403	988	415
hsa-mir-4454	Human	miRNA	1400.41	1274.44	125.97
hsa-mir-2964a	Human	miRNA	1396.5	1306	90.5
hsa-mir-2115	Human	miRNA	1368.5	1028.5	340
hsa-mir-3164	Human	miRNA	1354.54	1038.37	316.17
hsa-mir-3074	Human	miRNA	1349	832	517
hsa-mir-3177	Human	miRNA	1339.5	796.5	543
hsa-mir-3173	Human	miRNA	1327.33	700.83	626.5
hsa-mir-3130-2	Human	miRNA	1326.59	1121.59	205
hsa-mir-3656	Human	miRNA	1319.33	653.83	665.5
hsa-mir-1197	Human	miRNA	1294.5	1247.5	47
PTK2B (14)	Human	5p tailed mirtron	1289	146	1143
hsa-mir-1179	Human	miRNA	1286.5	1038	248.5
FLJ00285 (0)	Human	5p tailed mirtron	1279.03	275.03	1004
PKD1 (16)	Human	5p tailed mirtron	1279.03	275.03	1004
hsa-mir-4435-1	Human	miRNA	1273.83	1024.83	249
hsa-mir-4435-2	Human	miRNA	1273.83	1024.83	249
hsa-mir-4745	Human	3p tailed mirtron	1272	660	612
hsa-mir-3130-1	Human	miRNA	1261.59	1099.59	162
hsa-mir-1286	Human	miRNA	1259	722	537
hsa-mir-3171	Human	miRNA	1248.5	1174.5	74
hsa-mir-616	Human	miRNA	1242.47	1033.55	208.92
hsa-mir-765	Human	miRNA	1241.45	998.45	243
hsa-mir-3940	Human	3p tailed mirtron	1234	1089	145
hsa-mir-4787	Human	miRNA	1224	830	394
hsa-mir-585	Human	miRNA	1223	822	401
hsa-mir-1537	Human	miRNA	1218	1153	65
hsa-mir-373	Human	miRNA	1208	980	228
hsa-mir-2114	Human	miRNA	1205	938	267
hsa-mir-4508	Human	miRNA	1199.5	524	675.5
hsa-mir-4423	Human	miRNA	1196.93	967.93	229
hsa-mir-4443	Human	miRNA	1195	1096	99
hsa-mir-548u	Human	miRNA	1191.97	953.63	238.34
hsa-mir-573	Human	miRNA	1166.5	1137.5	29
hsa-mir-513b	Human	miRNA	1161	1094	67
hsa-mir-3911	Human	miRNA	1148.5	651	497.5
hsa-mir-1468	Human	miRNA	1145.5	948.5	197
hsa-mir-676	Human	miRNA	1145	833	312
hsa-mir-3174	Human	miRNA	1137.5	868.5	269
hsa-mir-3936	Human	miRNA	1129	717	412
hsa-mir-663	Human	miRNA	1126.4	942.4	184
hsa-mir-346	Human	miRNA	1123	881	242
hsa-mir-551a	Human	miRNA	1113.5	970.5	143
hsa-mir-4476	Human	miRNA	1113	612.5	500.5
hsa-mir-1228	Human	mirtron	1110	974	136
hsa-mir-522	Human	miRNA	1109.51	896.18	213.33
hsa-mir-3157	Human	miRNA	1109	963	146
AK304826 (10)	Human	5p tailed mirtron	1104.47	202.47	902
hsa-mir-3619	Human	miRNA	1095.27	872.77	222.5
hsa-mir-4450	Human	miRNA	1076.4	933.9	142.5
hsa-mir-4461	Human	miRNA	1075	607.33	467.67
hsa-mir-4466	Human	miRNA	1070.5	284.5	786
CALR (4)	Human	5p tailed mirtron	1034.5	690.5	344
hsa-mir-4525	Human	miRNA	1030	591	439
hsa-mir-1323	Human	miRNA	1001	895	106
hsa-mir-4464	Human	miRNA	996	879	117
hsa-mir-3131	Human	miRNA	990	528	462
hsa-mir-3136	Human	miRNA	971	785	186
ZNF107 (1)	Human	5p tailed mirtron	968	717	251
hsa-mir-597	Human	miRNA	966.5	744.5	222
hsa-mir-3677	Human	miRNA	953.67	613.17	340.5
hsa-mir-1305	Human	miRNA	952.5	873.5	79
TLN1 (31)	Human	5p tailed mirtron	952.08	703.08	249
hsa-mir-3121	Human	miRNA	950.5	901.5	49
hsa-mir-1284	Human	miRNA	946	897	49
hsa-mir-1283-2	Human	miRNA	940.43	832.93	107.5
hsa-mir-3689b	Human	miRNA	935.5	536.19	399.31
hsa-mir-3689a	Human	miRNA	935.43	533.89	401.54
hsa-mir-4791	Human	miRNA	933	440.5	492.5
RPL28 (3)	Human	5p tailed mirtron	928	768	160
hsa-mir-3126	Human	miRNA	916.83	688.83	228
hsa-mir-3188	Human	miRNA	914.5	567.5	347
hsa-mir-3689e	Human	miRNA	912.17	519.17	393
hsa-mir-4421	Human	miRNA	903.56	591.37	312.19
hsa-mir-1258	Human	miRNA	892.5	521.5	371
hsa-mir-548t	Human	miRNA	890.6	789.35	101.25
hsa-mir-4449	Human	miRNA	884.44	767.44	117
hsa-mir-3120	Human	miRNA	876.5	292	584.5
hsa-mir-4664	Human	miRNA	870	730	140
hsa-mir-2278	Human	miRNA	854.17	541.17	313
hsa-mir-514b	Human	miRNA	840	723	117
hsa-mir-3942	Human	miRNA	837	794	43
hsa-mir-4732	Human	miRNA	832.58	765.58	67
hsa-mir-3202-1	Human	miRNA	832	721.92	110.08
hsa-mir-4487	Human	miRNA	825.66	562.83	262.83
hsa-mir-937	Human	3p tailed mirtron	824.33	653.33	171
hsa-mir-133b	Human	miRNA	821.58	698.25	123.33
hsa-mir-548s	Human	miRNA	818.99	773.49	45.5
hsa-mir-4778	Human	miRNA	817	762.5	54.5
hsa-mir-4802	Human	miRNA	817	741	76
hsa-mir-668	Human	miRNA	806	608	198
hsa-mir-374c	Human	miRNA	805.92	618.42	187.5
hsa-mir-3916	Human	miRNA	798.45	755.42	43.03
LRWD1 (0)	Human	shrna candidate	795	475	320
GTF3C5 (2)	Human	5p tailed mirtron	791	526	265
hsa-mir-548n	Human	miRNA	785.79	716.91	68.88
hsa-mir-548v	Human	miRNA	783.21	658.17	125.04
hsa-mir-4728	Human	5p tailed mirtron	780.03	473.03	307
hsa-mir-1268	Human	miRNA	778.63	740.89	37.74
hsa-mir-2276	Human	miRNA	778	576	202
EZH1 (13)	Human	5p tailed mirtron	764.83	588.83	176
KIAA0467 (53)	Human	5p tailed mirtron	756.87	566.87	190
hsa-mir-3146	Human	miRNA	755	576	179
hsa-mir-3682	Human	miRNA	750	578	172
hsa-mir-3154	Human	miRNA	749.25	457.25	292
hsa-mir-548an	Human	miRNA	747.11	653.32	93.79
hsa-mir-1273c	Human	miRNA	737.92	363.77	374.15
hsa-mir-3163	Human	miRNA	735.71	617.71	118
hsa-mir-1272	Human	miRNA	732	705	27
hsa-mir-4444	Human	miRNA	730.5	610.5	120
hsa-mir-4766	Human	miRNA	729	556	173
hsa-mir-3622a	Human	miRNA	724.5	458.5	266
hsa-mir-510	Human	miRNA	724	657	67
hsa-mir-1285-2	Human	miRNA	719.8	415.11	304.69
EEF1G (4)	Human	5p tailed mirtron	718.92	285.92	433
hsa-mir-3529	Human	miRNA	717	618	99
hsa-mir-3910-1	Human	miRNA	716.46	674.13	42.33
hsa-mir-3910-2	Human	miRNA	716.46	674.13	42.33
hsa-mir-4724	Human	miRNA	715	609	106
hsa-mir-3913-1	Human	miRNA	709.92	573.42	136.5
hsa-mir-2116	Human	miRNA	706.33	530.83	175.5
hsa-mir-3199-2	Human	miRNA	703.5	523.5	180
hsa-mir-3913-2	Human	miRNA	698.92	562.42	136.5
SREBF1 (11)	Human	5p tailed mirtron	696	344	352
hsa-mir-1303	Human	miRNA	686.97	595.67	91.3
hsa-mir-4504	Human	miRNA	671.18	606.51	64.67
hsa-mir-548al	Human	miRNA	664.66	470.15	194.51
hsa-mir-1912	Human	miRNA	659	534	125
hsa-mir-1299	Human	miRNA	658.59	421.61	236.98
hsa-mir-4511	Human	miRNA	658	418	240
hsa-mir-4707	Human	miRNA	643.5	511.5	132
hsa-mir-1283-1	Human	miRNA	635.33	598.83	36.5
PNKD (5)	Human	5p tailed mirtron	632.5	486.5	146
TRIP6 (1)	Human	5p tailed mirtron	631.83	483.83	148
hsa-mir-4662a	Human	miRNA	629	549	80
hsa-mir-4520a	Human	miRNA	624.17	348.17	276
hsa-mir-3923	Human	miRNA	622	491	131
TPRA1 (7)	Human	5p tailed mirtron	620	453	167
hsa-mir-4750	Human	5p tailed mirtron	614	304	310
hsa-mir-3620	Human	5p tailed mirtron	599.45	128.45	471
ELOVL1 (5)	Human	5p tailed mirtron	599.15	405.15	194
hsa-mir-4427	Human	miRNA	599	515	84
hsa-mir-4661	Human	miRNA	587.5	423.5	164
hsa-mir-3690	Human	miRNA	579.5	522.25	57.25
hsa-mir-3115	Human	miRNA	574	477	97
hsa-mir-3545	Human	miRNA	569.83	385.83	184
hsa-mir-1976	Human	5p tailed mirtron	561.2	277.2	284
hsa-mir-3150a	Human	miRNA	559	440	119
CASC3 (3)	Human	5p tailed mirtron	556.5	459.5	97
hsa-mir-3202-2	Human	miRNA	556	488.92	67.08
hsa-mir-541	Human	miRNA	551	339.5	211.5
hsa-mir-3175	Human	miRNA	546	422	124
hsa-mir-3657	Human	miRNA	545.64	512.09	33.55
TRIM28 (15)	Human	mirtron	543.45	339.45	204
hsa-mir-4484	Human	miRNA	541.88	308.62	233.26
hsa-mir-3194	Human	miRNA	539.25	264.25	275
CCNF (8)	Human	5p tailed mirtron	535	488	47
hsa-mir-1229	Human	mirtron	535	303	232
MED24 (13)	Human	5p tailed mirtron	534.2	479.2	55
hsa-mir-580	Human	miRNA	527.5	467	60.5
hsa-mir-1181	Human	miRNA	521.01	507.01	14
hsa-mir-4736	Human	miRNA	520	515	5
SYT12 (5)	Human	5p tailed mirtron	518	390	128
hsa-mir-552	Human	miRNA	515.5	432.5	83
hsa-mir-4467	Human	miRNA	515	349	166
hsa-mir-3606	Human	5p tailed mirtron	514	499	15
hsa-mir-4753	Human	miRNA	514	383	131
hsa-mir-3179-1	Human	miRNA	511.17	463.67	47.5
hsa-mir-3179-2	Human	miRNA	511.17	463.67	47.5
hsa-mir-3179-3	Human	miRNA	511.17	463.67	47.5
hsa-mir-521-1	Human	miRNA	511	476	35
hsa-mir-4798	Human	miRNA	510	463	47
hsa-mir-3193	Human	miRNA	506	383	123
hsa-mir-605	Human	miRNA	504	475	29
hsa-mir-548h-3	Human	miRNA	503.04	482.31	20.73
POLR2F (3)	Human	5p tailed mirtron	490.83	257.83	233
hsa-mir-933	Human	miRNA	488.5	346.5	142
hsa-mir-4515	Human	miRNA	487.5	286.5	201
hsa-mir-4513	Human	miRNA	487	294	193
hsa-mir-548h-4	Human	miRNA	481.06	459.65	21.41
hsa-mir-3139	Human	miRNA	479.5	378.5	101
hsa-mir-4688	Human	3p tailed mirtron	477.92	240.92	237
GTF2F1 (0)	Human	5p tailed mirtron	477	388	89
hsa-mir-1257	Human	miRNA	474	468	6
hsa-mir-548h-2	Human	miRNA	473.53	451.12	22.41
hsa-mir-4796	Human	miRNA	470.5	339	131.5
hsa-mir-4638	Human	miRNA	468	247	221
hsa-mir-3149	Human	miRNA	467.67	400.67	67
hsa-mir-4431	Human	miRNA	467	428	39
hsa-mir-548h-5	Human	miRNA	466.77	447.46	19.31
hsa-mir-548h-1	Human	miRNA	466.55	446.24	20.31
hsa-mir-4667	Human	5p tailed mirtron	462.5	303.5	159
hsa-mir-3667	Human	miRNA	454	371	83
hsa-mir-4437	Human	miRNA	452	340	112
hsa-mir-4786	Human	miRNA	451	335	116
hsa-mir-521-2	Human	miRNA	449	415	34
hsa-mir-4306	Human	miRNA	448.92	15.92	433
hsa-mir-3145	Human	miRNA	448.33	413	35.33
hsa-mir-3610	Human	miRNA	447	437	10
hsa-mir-4470	Human	miRNA	445	225	220
hsa-mir-3165	Human	miRNA	437.5	379	58.5
hsa-mir-4458	Human	miRNA	433	266	167
hsa-mir-3199-1	Human	miRNA	428	340.5	87.5
hsa-mir-4761	Human	miRNA	427	319	108
hsa-mir-3197	Human	miRNA	421	281	140
TMBIM1 (2)	Human	5p tailed mirtron	416.5	323.5	93
hsa-mir-4448	Human	miRNA	415.59	78.92	336.67
ZSCAN22 (0)	Human	5p tailed mirtron	415	124	291
hsa-mir-4690	Human	3p tailed mirtron	414.33	255.33	159
hsa-mir-4654	Human	miRNA	414	251	163
hsa-mir-1290	Human	miRNA	412.84	249.34	163.5
hsa-mir-4657	Human	miRNA	412.5	282.5	130
hsa-mir-939	Human	5p tailed mirtron	411.62	198.62	213
SLC12A3 (23)	Human	5p tailed mirtron	410	362	48
hsa-mir-1910	Human	miRNA	404.6	343.77	60.83
hsa-mir-4760	Human	miRNA	401	387	14
hsa-mir-4687	Human	miRNA	400	190	210
ENO1 (2)	Human	5p tailed mirtron	399	236	163
hsa-mir-4738	Human	miRNA	398.9	208.9	190
hsa-mir-4772	Human	miRNA	397.5	328.5	69
hsa-mir-1243	Human	miRNA	396	349	47
hsa-mir-4442	Human	miRNA	393.5	387.5	6
hsa-mir-4529	Human	miRNA	391.16	255.83	135.33
DNM2 (17)	Human	5p tailed mirtron	390.83	137.83	253
hsa-mir-516b-1	Human	miRNA	390.5	324.55	65.95
hsa-mir-1245	Human	miRNA	389	341	48
hsa-mir-548d-1	Human	miRNA	386.07	369.69	16.38
hsa-mir-3661	Human	miRNA	386	271	115
hsa-mir-4660	Human	miRNA	385	346	39
hsa-mir-4492	Human	miRNA	384	368	16
hsa-mir-548ag-2	Human	miRNA	383.7	343.7	40
hsa-mir-548d-2	Human	miRNA	383.46	367.04	16.42
hsa-mir-4651	Human	miRNA	381.5	66.5	315
hsa-mir-4743	Human	5p tailed mirtron	378	229	149
hsa-mir-3681	Human	miRNA	378	269	109
hsa-mir-2467	Human	miRNA	377.5	258.25	119.25
hsa-mir-3155	Human	miRNA	376.61	248.61	128
hsa-mir-548ai	Human	miRNA	375.33	364.42	10.91
hsa-mir-3128	Human	miRNA	375	360	15
hsa-mir-4523	Human	miRNA	373	278	95
hsa-mir-3159	Human	miRNA	372.82	216.81	156.01
hsa-mir-4659a	Human	miRNA	366.7	329.53	37.17
hsa-mir-4727	Human	miRNA	364	214	150
hsa-mir-4526	Human	miRNA	363.29	189.29	174
RUNX3 (1)	Human	5p tailed mirtron	363	273	90
hsa-mir-4762	Human	miRNA	362.83	303.33	59.5
SAPS1 (10)	Human	5p tailed mirtron	361.5	177.5	184
hsa-mir-3944	Human	miRNA	361	221	140
DBNL (1)	Human	5p tailed mirtron	358.67	250.67	108
hsa-mir-4781	Human	miRNA	357	275	82
hsa-mir-548ac	Human	miRNA	353	325.88	27.12
hsa-mir-4785	Human	miRNA	350.5	144	206.5
HRMT1L2 (3)	Human	5p tailed mirtron	348.5	290.5	58
hsa-mir-516b-2	Human	miRNA	346.5	284.55	61.95
hsa-mir-4498	Human	miRNA	344	232.67	111.33
SLC7A5 (7)	Human	5p tailed mirtron	341.67	144.67	197
hsa-mir-3162	Human	miRNA	341.25	158.25	183
ZYX (2)	Human	mirtron	341	291	50
hsa-mir-4512	Human	miRNA	339.64	243.64	96
hsa-mir-4520b	Human	miRNA	338.17	120.17	218
hsa-mir-1343	Human	miRNA	338	247.5	90.5
hsa-mir-3652	Human	miRNA	335.99	318.49	17.5
hsa-mir-4749	Human	5p tailed mirtron	335.5	198.5	137
USP20 (12)	Human	5p tailed mirtron	334	177	157
hsa-mir-3689f	Human	miRNA	334	242	92
AP2A1 (3)	Human	5p tailed mirtron	332.33	164.33	168
hsa-mir-1260	Human	miRNA	331.71	305.71	26
hsa-mir-1914	Human	miRNA	331.5	125.5	206
hsa-mir-4747	Human	5p tailed mirtron	330	201	129
hsa-mir-3135	Human	miRNA	329.88	131.88	198
hsa-mir-548f-1	Human	miRNA	328.71	260.58	68.13
hsa-mir-600	Human	miRNA	327	298.5	28.5
hsa-mir-3198-2	Human	miRNA	326.08	281.58	44.5
PFKM (7)	Human	5p tailed mirtron	326	276	50
hsa-mir-3198-1	Human	miRNA	321.08	276.58	44.5
CD22 (10)	Human	5p tailed mirtron	320	51	269
hsa-mir-4502	Human	miRNA	320	297	23
hsa-mir-4726	Human	5p tailed mirtron	315.5	222.5	93
hsa-mir-3684	Human	miRNA	312	270	42
hsa-mir-3659	Human	miRNA	311	221	90
hsa-mir-549	Human	miRNA	307.5	288.5	19
hsa-mir-3938	Human	miRNA	306	261	45
RGS19 (0)	Human	5p tailed mirtron	304	201	103
hsa-mir-3939	Human	miRNA	304	201	103
hsa-mir-3616	Human	miRNA	302.5	236.5	66
MUC5B (37)	Human	5p tailed mirtron	302	138	164
EBNA1BP2 (0)	Human	5p tailed mirtron	300	186	114
hsa-mir-1227	Human	mirtron	300	15	285
BAT2 (16)	Human	5p tailed mirtron	298.33	240.33	58
hsa-mir-3170	Human	miRNA	297	268	29
hsa-mir-507	Human	miRNA	297	243	54
hsa-mir-4536	Human	miRNA	295	272.5	22.5
EXOSC4 (0)	Human	5p tailed mirtron	294.5	236.5	58
hsa-mir-3925	Human	miRNA	292	223	69
hsa-mir-4469	Human	miRNA	292	218	74
hsa-mir-4474	Human	miRNA	291.5	196.5	95
hsa-mir-4477b	Human	miRNA	291.01	242.58	48.43
hsa-mir-4652	Human	miRNA	291	273	18
MTMR3 (8)	Human	5p tailed mirtron	289	190	99
hsa-mir-4734	Human	miRNA	288.5	193.5	95
hsa-mir-466	Human	miRNA	286.51	270.76	15.75
hsa-mir-4751	Human	miRNA	285.33	264.33	21
hsa-mir-3655	Human	miRNA	285	276	9
hsa-mir-4422	Human	miRNA	284	203	81
hsa-mir-4775	Human	miRNA	282.67	267.17	15.5
COL18A1 (7)	Human	5p tailed mirtron	281	221	60
NOL6 (10)	Human	5p tailed mirtron	281	154	127
hsa-mir-4489	Human	miRNA	279	204	75
hsa-mir-4725	Human	miRNA	278.83	187.83	91
KIAA0638 (1)	Human	5p tailed mirtron	277.5	215.5	62
hsa-mir-4783	Human	miRNA	277	100	177
hsa-mir-4493	Human	miRNA	276	233	43
hsa-mir-2681	Human	miRNA	275	180	95
hsa-mir-3183	Human	miRNA	275	151	124
KDM5C (14)	Human	5p tailed mirtron	274	136	138
KIAA0195 (28)	Human	5p tailed mirtron	271	192	79
SLC39A7 (1)	Human	shrna candidate	269.2	180.2	89
TATDN1 (6)	Human	mirtron	267.7	198.7	69
hsa-mir-3651	Human	miRNA	267	263	4
hsa-mir-4475	Human	miRNA	267	176	91
RNPEP (7)	Human	5p tailed mirtron	266.5	170.5	96
hsa-mir-3618	Human	miRNA	266.33	262.33	4
hsa-mir-632	Human	miRNA	266	258	8
LDLR (8)	Human	5p tailed mirtron	265.25	152.25	113
LASP1 (4)	Human	5p tailed mirtron	263	142	121
hsa-mir-4685	Human	5p tailed mirtron	261.99	107.99	154
hsa-mir-4482	Human	miRNA	258.6	209.6	49
hsa-mir-4774	Human	miRNA	255	248	7
hsa-mir-512-2	Human	miRNA	254.83	99.33	155.5
hsa-mir-512-1	Human	miRNA	254.5	99	155.5
hsa-mir-3122	Human	miRNA	254	235	19
hsa-mir-4505	Human	miRNA	253.33	246.33	7
hsa-mir-4680	Human	miRNA	252.67	218.67	34
hsa-mir-4516	Human	miRNA	252.2	212.2	40
hsa-mir-4668	Human	miRNA	251.03	166.86	84.17
hsa-mir-3151	Human	miRNA	248	116	132
hsa-mir-520b	Human	miRNA	246.6	235.93	10.67
hla-b (0)	Human	3p tailed mirtron	245	126	119
hsa-mir-663b	Human	miRNA	244.9	222.4	22.5
hsa-mir-3168	Human	miRNA	243.5	89.5	154
hsa-mir-3191	Human	miRNA	243	138	105
hsa-mir-519b	Human	miRNA	241.85	186.18	55.67
hsa-mir-4645	Human	miRNA	241.33	149.33	92
FAM50A (11)	Human	3p tailed mirtron	240.5	152.5	88
RPL10A (4)	Human	5p tailed mirtron	238.17	81.17	157
hsa-mir-4691	Human	miRNA	238	208	30
hsa-mir-3612	Human	miRNA	237	226	11
hsa-mir-1915	Human	miRNA	233.5	122.5	111
PYCR2 (0)	Human	5p tailed mirtron	232.2	139.2	93
hsa-mir-3926-2	Human	miRNA	231.64	170.64	61
hsa-mir-639	Human	miRNA	231.5	226.5	5
hsa-mir-4709	Human	miRNA	230.5	177.5	53
hsa-mir-4518	Human	miRNA	230.02	211.02	19
SAPS1 (2)	Human	5p tailed mirtron	230	166	64
hsa-mir-3617	Human	miRNA	229.5	210.5	19
hsa-mir-3688-1	Human	miRNA	229.01	214.51	14.5
hsa-mir-4689	Human	miRNA	229	83	146
hsa-mir-4713	Human	miRNA	227	156	71
hsa-mir-3160-1	Human	miRNA	226.68	131.68	95
hsa-mir-3160-2	Human	miRNA	226.68	131.68	95
MARS (14)	Human	5p tailed mirtron	225.33	101.33	124
hsa-mir-548y	Human	miRNA	224.65	204.58	20.07
TRMT2A (6)	Human	5p tailed mirtron	224	121	103
hsa-mir-1273d	Human	miRNA	223.29	165.34	57.95
hsa-mir-3692	Human	miRNA	223	131	92
hsa-mir-4779	Human	miRNA	223	192	31
hsa-mir-544b	Human	miRNA	222	200	22
hsa-mir-3927	Human	miRNA	220	184	36
RNF5 (2)	Human	5p tailed mirtron	219.7	123.7	96
hsa-mir-891a	Human	miRNA	219	190	29
EIF3C (9)	Human	5p tailed mirtron	218.14	150.14	68
DHRS3 (2)	Human	5p tailed mirtron	216	130	86
PIAS3 (10)	Human	5p tailed mirtron	215	140	75
hsa-mir-4789	Human	miRNA	215	188	27
hsa-mir-520f	Human	miRNA	215	187	28
hsa-mir-1193	Human	miRNA	214	158	56
DKFZp434K1323 (0)	Human	5p tailed mirtron	213.48	47.48	166
hsa-mir-3918	Human	miRNA	213	159	54
hsa-mir-4639	Human	5p tailed mirtron	209	153	56
hsa-mir-4522	Human	miRNA	208	153	55
hsa-mir-4755	Human	miRNA	208	166.5	41.5
hsa-mir-4640	Human	5p tailed mirtron	207.6	113.6	94
hsa-mir-4637	Human	miRNA	205	181	24
TCIRG1 (8)	Human	5p tailed mirtron	203.33	61.33	142
hsa-mir-4797	Human	miRNA	200.75	161.25	39.5
AK127627 (5)	Human	5p tailed mirtron	200	158	42
hsa-mir-3688-2	Human	miRNA	196	179.5	16.5
hsa-mir-636	Human	miRNA	195.67	141.67	54
hsa-mir-4699	Human	miRNA	195.5	167.5	28
hsa-mir-4793	Human	miRNA	195	150	45
hsa-mir-4723	Human	miRNA	194	162	32
hsa-mir-770	Human	miRNA	194	74	120
hsa-mir-4646	Human	5p tailed mirtron	193	106	87
hsa-mir-1236	Human	mirtron	192.5	117.5	75
hsa-mir-1538	Human	miRNA	192	141	51
hsa-mir-517a	Human	miRNA	191.83	173.33	18.5
hsa-mir-517b	Human	miRNA	191.83	173.33	18.5
hsa-mir-4721	Human	miRNA	191.5	178.5	13
hsa-mir-3184	Human	miRNA	191	157	34
hsa-mir-4501	Human	miRNA	191	181	10
POLM (9)	Human	5p tailed mirtron	188.5	90.5	98
hsa-mir-3654	Human	miRNA	187.33	179	8.33
hsa-mir-4434	Human	miRNA	187.33	173.83	13.5
hsa-mir-3680	Human	miRNA	187.33	167	20.33
hsa-mir-3919	Human	miRNA	187	163.5	23.5
BC037884 (0)	Human	5p tailed mirtron	186.5	17.5	169
TNK2 (4)	Human	5p tailed mirtron	186	81	105
hsa-mir-518b	Human	miRNA	184.14	148.14	36
hsa-mir-581	Human	miRNA	183	169	14
hsa-mir-1255b-1	Human	miRNA	182.74	151.84	30.9
hsa-mir-1255b-2	Human	miRNA	182.73	151.83	30.9
hsa-mir-4763	Human	miRNA	181.5	68.5	113
SYNGAP1 (7)	Human	5p tailed mirtron	179.5	142.5	37
hsa-mir-4665	Human	miRNA	179	146	33
NDUFS8 (2)	Human	5p tailed mirtron	176.25	123.25	53
hsa-mir-943	Human	miRNA	176	104	72
hsa-mir-544	Human	miRNA	175.11	134.07	41.04
hsa-mir-3189	Human	miRNA	175	131	44
hsa-mir-4533	Human	miRNA	175	139	36
hsa-mir-527	Human	miRNA	175	145.67	29.33
IPO9 (12)	Human	5p tailed mirtron	174.36	134.36	40
KIF18B (2)	Human	5p tailed mirtron	173	116	57
ARHGEF2 (18)	Human	5p tailed mirtron	172	117	55
hsa-mir-1237	Human	5p tailed mirtron	172	25	147
hsa-mir-3167	Human	miRNA	172	142	30
KIAA0973 (9)	Human	5p tailed mirtron	171	91	80
hsa-mir-4430	Human	miRNA	170.95	167.6	3.35
hsa-mir-4649	Human	5p tailed mirtron	170	59	111
KIAA0564 (43)	Human	5p tailed mirtron	170	23	147
hsa-mir-4479	Human	miRNA	170	99	71
hsa-mir-4636	Human	miRNA	170	141	29
hsa-mir-3161	Human	miRNA	169.75	135.75	34
TARS2 (4)	Human	5p tailed mirtron	169	147	22
YY1 (3)	Human	5p tailed mirtron	168	125	43
hsa-mir-3678	Human	miRNA	167.5	120.5	47
hsa-mir-4424	Human	miRNA	167.5	134.5	33
SMC1A (9)	Human	5p tailed mirtron	167	31	136
hsa-mir-4804	Human	miRNA	167	150	17
hsa-mir-4453	Human	miRNA	166.5	163.5	3
hsa-mir-4758	Human	3p tailed mirtron	166	97	69
hsa-mir-4800	Human	miRNA	165.53	154.53	11
hsa-mir-4471	Human	miRNA	164.5	130.5	34
hsa-mir-4519	Human	miRNA	164	159	5
hsa-mir-4700	Human	miRNA	164	129	35
EED (10)	Human	5p tailed mirtron	163	150	13
hsa-mir-4723	Human	5p tailed mirtron	163	136	27
hsa-mir-4714	Human	miRNA	163	146	17
hsa-mir-4324	Human	miRNA	162	1	161
hsa-mir-4767	Human	miRNA	161.5	69	92.5
hsa-mir-3181	Human	miRNA	161	85	76
MLPH (3)	Human	5p tailed mirtron	159	123	36
hsa-mir-499a	Human	miRNA	159	145	14
TNS1 (0)	Human	5p tailed mirtron	157.18	105.18	52
hsa-mir-4658	Human	miRNA	157	129	28
hsa-mir-548q	Human	miRNA	156.75	106.41	50.34
PKD1 (7)	Human	5p tailed mirtron	156	85	71
hsa-mir-3943	Human	miRNA	156	121	35
hsa-mir-4436a	Human	miRNA	156	87	69
hsa-mir-4457	Human	miRNA	154	124	30
PFDN6 (2)	Human	mirtron	154	101	53
hsa-mir-3153	Human	miRNA	153	140	13
hsa-mir-4635	Human	miRNA	153	107	46
hsa-mir-3929	Human	miRNA	149.61	99.11	50.5
hsa-mir-3152	Human	miRNA	149	138	11
FBRSL1 (14)	Human	5p tailed mirtron	148.24	42.24	106
hsa-mir-4768	Human	miRNA	147.33	142.83	4.5
ACAP3 (5)	Human	5p tailed mirtron	147	39	108
RAPGEFL1 (13)	Human	5p tailed mirtron	147	108	39
MCAM (4)	Human	5p tailed mirtron	146.75	21.75	125
hsa-mir-524	Human	miRNA	146.5	119.5	27
MIIP (4)	Human	5p tailed mirtron	146	78	68
TRIM11 (3)	Human	5p tailed mirtron	146	20	126
hsa-mir-515-1	Human	miRNA	146	133.5	12.5
hsa-mir-515-2	Human	miRNA	146	133.5	12.5
hsa-mir-520a	Human	miRNA	145.57	113.57	32
hsa-mir-518c	Human	miRNA	145.5	103.5	42
RPS19 (3)	Human	5p tailed mirtron	145.14	91.14	54
hsa-mir-588	Human	miRNA	145	132	13
hsa-mir-3941	Human	miRNA	144	127	17
hsa-mir-3116-1	Human	miRNA	142.81	111.61	31.2
hsa-mir-4676	Human	miRNA	139.5	129	10.5
RANGAP1 (9)	Human	5p tailed mirtron	139	88	51
hsa-mir-518a-2	Human	miRNA	138	118.17	19.83
hsa-mir-519c	Human	miRNA	135.51	114.18	21.33
hsa-mir-4722	Human	5p tailed mirtron	135	62	73
hsa-mir-1288	Human	miRNA	135	121	14
GPR108 (0)	Human	5p tailed mirtron	134.25	56.25	78
CPSF3L (12)	Human	5p tailed mirtron	134	42	92
hsa-mir-1911	Human	miRNA	134	104	30
hsa-mir-518a-1	Human	miRNA	134	116.17	17.83
hsa-mir-1245b	Human	miRNA	133	111	22
hsa-mir-4670	Human	miRNA	133	126	7
CUX2 (8)	Human	5p tailed mirtron	132.81	78.81	54
hsa-mir-4705	Human	miRNA	132.17	119.17	13
hsa-mir-4506	Human	miRNA	132	93	39
PLD3 (5)	Human	5p tailed mirtron	131.33	55.33	76
TENC1 (9)	Human	5p tailed mirtron	131.33	92.33	39
hsa-mir-548p	Human	miRNA	130.42	119.41	11.01
hsa-mir-4739	Human	miRNA	129.75	75.75	54
hsa-mir-1909	Human	3p tailed mirtron	128	55	73
hsa-mir-4706	Human	miRNA	128	70	58
hsa-mir-4735	Human	miRNA	128	101	27
hsa-mir-4717	Human	miRNA	126.03	53.7	72.33
EXOC7 (1)	Human	5p tailed mirtron	126	47	79
hsa-mir-4503	Human	miRNA	126	121	5
hsa-mir-559	Human	miRNA	126	107	19
hsa-mir-670	Human	miRNA	126	116	10
hsa-mir-4748	Human	miRNA	125.5	100	25.5
hsa-mir-548am	Human	miRNA	125.25	111.08	14.17
hsa-mir-518e	Human	miRNA	124.41	96.08	28.33
NELF (7)	Human	5p tailed mirtron	123.75	45.75	78
hsa-mir-3922	Human	miRNA	123.7	89.2	34.5
SYVN1 (12)	Human	5p tailed mirtron	123	66	57
hsa-mir-371b	Human	miRNA	123	98	25
hsa-mir-4433	Human	miRNA	123	98	25
hsa-mir-4716	Human	miRNA	122.56	91.23	31.33
hsa-mir-3672	Human	miRNA	122	114	8
hsa-mir-4764	Human	miRNA	122	103	19
hsa-mir-4708	Human	miRNA	121	82.67	38.33
hsa-mir-3116-2	Human	miRNA	120.81	94.61	26.2
CAMTA2 (16)	Human	5p tailed mirtron	119.5	70.5	49
BOP1 (10)	Human	5p tailed mirtron	119	16	103
hsa-mir-4757	Human	miRNA	119	81	38
hsa-mir-658	Human	miRNA	119	113	6
hsa-mir-4284	Human	miRNA	118.6	75.27	43.33
COPG (18)	Human	5p tailed mirtron	118.58	61.58	57
PLCG1 (3)	Human	5p tailed mirtron	118	53	65
hsa-mir-1913	Human	miRNA	117.5	79.5	38
hsa-mir-612	Human	miRNA	117.5	106.5	11
hsa-mir-4428	Human	miRNA	117.06	81.06	36
DOCK5 (24)	Human	5p tailed mirtron	117	64	53
hsa-mir-4662b	Human	miRNA	117	96	21
DVL1 (1)	Human	5p tailed mirtron	114	32	82
hsa-mir-4684	Human	miRNA	114	94	20
hsa-mir-4754	Human	miRNA	113	85	28
hsa-mir-4426	Human	miRNA	112.7	94.58	18.12
NOTCH3 (20)	Human	5p tailed mirtron	112	33	79
hsa-mir-4477a	Human	miRNA	111.91	95.91	16
PIGT (10)	Human	5p tailed mirtron	111.5	24.5	87
hsa-mir-4782	Human	miRNA	111.5	108.5	3
Nbla00537 (4)	Human	5p tailed mirtron	111.33	42.33	69
RNF216 (10)	Human	5p tailed mirtron	111	79	32
hsa-mir-548ab	Human	miRNA	109.89	103.49	6.4
LMNB2 (4)	Human	mirtron	109.5	56.5	53
hsa-mir-518f	Human	miRNA	109.3	89.5	19.8
QARS (12)	Human	5p tailed mirtron	109	77	32
hsa-mir-4490	Human	miRNA	109	100	9
ABCC10 (2)	Human	5p tailed mirtron	108.83	29.83	79
hsa-mir-4784	Human	miRNA	107.5	88.5	19
PPP5C (9)	Human	5p tailed mirtron	107	50	57
UBTF (16)	Human	5p tailed mirtron	107	83	24
hsa-mir-4695	Human	miRNA	107	65	42
OPLAH (9)	Human	5p tailed mirtron	106	63	43
SAPS1 (19)	Human	5p tailed mirtron	106	61	45
hsa-mir-548w	Human	miRNA	104.71	101.85	2.86
hsa-mir-4491	Human	miRNA	104.5	85	19.5
hsa-mir-4445	Human	miRNA	104.14	73.14	31
CAMTA2 (17)	Human	5p tailed mirtron	104	82	22
CREB3 (0)	Human	5p tailed mirtron	104	13	91
TIP49b (6)	Human	5p tailed mirtron	104	35	69
hsa-mir-4655	Human	miRNA	104	51	53
hsa-mir-4740	Human	miRNA	104	56	48
hsa-mir-548ad	Human	miRNA	103.75	97.52	6.23
ATG2A (6)	Human	5p tailed mirtron	103	43	60
hsa-mir-4731	Human	miRNA	103	64	39
hsa-mir-3926-1	Human	miRNA	101.64	66.64	35
hsa-mir-1827	Human	miRNA	101.5	23.5	78
hsa-mir-519d	Human	miRNA	101	91	10
hsa-mir-3125	Human	miRNA	100	78	22
AMOTL2 (1)	Human	5p tailed mirtron	99	56	43
PACSIN3 (5)	Human	5p tailed mirtron	98.8	84.8	14
hsa-mir-4451	Human	miRNA	98.5	28.5	70
NCOR2 (0)	Human	5p tailed mirtron	98.2	20.2	78
hsa-mir-4528	Human	miRNA	98	86	12
hsa-mir-4733	Human	miRNA	98	68	30
FADS3 (4)	Human	5p tailed mirtron	97.17	55.17	42
hsa-mir-642b	Human	miRNA	97.17	53.67	43.5
TPCN1 (23)	Human	5p tailed mirtron	97	41	56
hsa-mir-4765	Human	miRNA	97	86	11
hsa-mir-548x-2	Human	miRNA	96.88	85.26	11.62
NEFL (1)	Human	5p tailed mirtron	96.5	85.5	11
SLC39A1 (1)	Human	5p tailed mirtron	96	18	78
hsa-mir-208b	Human	miRNA	96	85	11
hsa-mir-3908	Human	miRNA	95.08	67.08	28
hsa-mir-525	Human	miRNA	95	73	22
hsa-mir-526b	Human	miRNA	95	75.33	19.67
hsa-mir-4672	Human	miRNA	94.33	38.33	56
hsa-mir-3148	Human	miRNA	94	84	10
hsa-mir-1265	Human	miRNA	92	88	4
hsa-mir-520g	Human	miRNA	91	80.5	10.5
Fe65L2 (0)	Human	mirtron	91	46	45
CDK4 (6)	Human	5p tailed mirtron	90.33	70.33	20
hsa-mir-3147	Human	miRNA	90.2	57.2	33
WRNIP1 (4)	Human	5p tailed mirtron	90	79	11
hsa-mir-3663	Human	miRNA	90	36	54
hsa-mir-4527	Human	miRNA	90	86	4
PFKFB4 (1)	Human	5p tailed mirtron	89	45	44
SNX8 (7)	Human	5p tailed mirtron	89	36	53
hsa-mir-4432	Human	miRNA	89	36	53
MED25 (10)	Human	mirtron	89	42	47
JAG2 (2)	Human	mirtron	88	33	55
hsa-mir-4496	Human	miRNA	87.61	82.49	5.12
CLU (0)	Human	5p tailed mirtron	87	29	58
hsa-mir-892a	Human	miRNA	87	70	17
hsa-mir-1289-1	Human	miRNA	85.97	72.97	13
hsa-mir-4440	Human	miRNA	85.6	36.04	49.56
FP221 (5)	Human	5p tailed mirtron	83.74	36.74	47
IRF8 (5)	Human	5p tailed mirtron	83.5	34.5	49
ADCY7 (3)	Human	5p tailed mirtron	83	24	59
FXYD3 (4)	Human	5p tailed mirtron	81.5	35.5	46
KDM5C (19)	Human	5p tailed mirtron	81	58	23
hsa-mir-3186	Human	miRNA	81	51	30
hsa-mir-3945	Human	miRNA	81	52	29
hsa-mir-4648	Human	miRNA	80.5	52.5	28
hsa-mir-4642	Human	miRNA	80	56	24
SHMT1 (4)	Human	5p tailed mirtron	79.5	38.5	41
hsa-mir-1244-1	Human	miRNA	79.35	74.67	4.68
hsa-mir-1244-2	Human	miRNA	79.35	74.67	4.68
PDIA5 (15)	Human	5p tailed mirtron	79	22	57
hsa-mir-3685	Human	miRNA	79	75	4
POLG (7)	Human	5p tailed mirtron	78	61	17
hsa-mir-4480	Human	miRNA	78	71	7
hsa-mir-4770	Human	miRNA	78	62	16
hsa-mir-1244-3	Human	miRNA	77.52	72.84	4.68
AIP (3)	Human	5p tailed mirtron	77.33	15.33	62
SEMA7A (11)	Human	5p tailed mirtron	77	49	28
TANC1 (14)	Human	5p tailed mirtron	77	14	63
hsa-mir-4507	Human	miRNA	76.78	30.91	45.87
FKBP12-Exip2 (0)	Human	3p tailed mirtron	76.5	54.5	22
hsa-mir-4436b	Human	miRNA	76.17	51.5	24.67
HMGA1 (1)	Human	5p tailed mirtron	76	48	28
hsa-mir-1263	Human	miRNA	76	66	10
hsa-mir-1264	Human	miRNA	76	62	14
hsa-mir-4659b	Human	miRNA	75.7	48.53	27.17
hsa-mir-517c	Human	miRNA	75.33	69.33	6
hsa-mir-3134	Human	miRNA	75.08	67.59	7.49
HGS (9)	Human	5p tailed mirtron	75	51	24
hsa-mir-3137	Human	miRNA	75	59	16
hsa-mir-3166	Human	miRNA	75	40.5	34.5
hsa-mir-4669	Human	miRNA	74.5	45.5	29
IKBKE (3)	Human	5p tailed mirtron	74.33	39.33	35
C12orf51 (66)	Human	5p tailed mirtron	74	22	52
DGAT1 (12)	Human	5p tailed mirtron	74	44	30
RIC8A (1)	Human	5p tailed mirtron	74	34	40
hsa-mir-2392	Human	miRNA	74	30	44
PIM3 (4)	Human	mirtron	74	60	14
hsa-mir-4795	Human	miRNA	73.83	61.83	12
hsa-mir-520d	Human	miRNA	73.5	60.5	13
hsa-mir-1973	Human	miRNA	72.86	70.93	1.93
hsa-mir-4777	Human	miRNA	72.5	62.5	10
CELSR3 (35)	Human	5p tailed mirtron	72	35	37
CPSF1 (7)	Human	5p tailed mirtron	70	27	43
JAG1 (0)	Human	5p tailed mirtron	70	29	41
MYH9 (33)	Human	5p tailed mirtron	70	24	46
hsa-mir-498	Human	miRNA	70	61	9
hsa-mir-523	Human	miRNA	69.51	52.18	17.33
hsa-mir-3156-1	Human	miRNA	69.25	47.77	21.48
hsa-mir-3156-2	Human	miRNA	69.25	47.77	21.48
hsa-mir-3689c	Human	miRNA	68.97	45.94	23.03
hsa-mir-4769	Human	miRNA	68.5	54.5	14
ZC3H12A (1)	Human	5p tailed mirtron	68.17	28.17	40
hsa-mir-548f-4	Human	miRNA	68.03	41.68	26.35
hsa-mir-4674	Human	miRNA	68	44	24
hsa-mir-602	Human	miRNA	68	39	29
hsa-mir-548ak	Human	miRNA	67.81	54.24	13.57
KIAA0664 (16)	Human	5p tailed mirtron	67.5	28.5	39
TTC21A (25)	Human	5p tailed mirtron	67	21	46
hsa-mir-3141	Human	miRNA	66.98	59.45	7.53
hsa-mir-3133	Human	miRNA	66.12	61.36	4.76
hsa-mir-586	Human	miRNA	66	52	14
hsa-mir-1280	Human	miRNA	65.83	61.33	4.5
hsa-mir-4799	Human	miRNA	65.5	48.5	17
hsa-mir-890	Human	miRNA	65.5	62.5	3
BECN1 (0)	Human	5p tailed mirtron	65	30	35
MGRN1 (7)	Human	5p tailed mirtron	65	11	54
SEMA (5)	Human	5p tailed mirtron	65	41	24
hsa-mir-4644	Human	miRNA	64.95	54.53	10.42
hsa-mir-1273	Human	miRNA	64.01	53.9	10.11
GTF2F1 (0)	Human	3p tailed mirtron	64	30	34
hsa-mir-4683	Human	miRNA	64	54	10
ESRP2 (3)	Human	5p tailed mirtron	63	54	9
KIFC3 (3)	Human	5p tailed mirtron	63	46	17
TMEM179B (3)	Human	5p tailed mirtron	63	42	21
hsa-mir-3622b	Human	miRNA	63	37	26
hsa-mir-4419b	Human	miRNA	62.72	61.22	1.5
hsa-mir-611	Human	miRNA	62.5	61.5	1
SLC16A3 (1)	Human	5p tailed mirtron	62	22	40
hsa-mir-3156-3	Human	miRNA	61.94	43.46	18.48
hsa-mir-548ae-2	Human	miRNA	61.93	60.86	1.07
ATG2A (1)	Human	5p tailed mirtron	61.83	24.83	37
hsa-mir-4710	Human	miRNA	61.83	59.83	2
hsa-mir-548c	Human	miRNA	61.79	57.26	4.53
NFKBIL2 (16)	Human	5p tailed mirtron	61.5	31.5	30
hsa-mir-520c	Human	miRNA	60.15	50.68	9.47
hsa-mir-4641	Human	5p tailed mirtron	60	47	13
hsa-mir-548ag-1	Human	miRNA	59.7	45.7	14
NRBP2 (5)	Human	5p tailed mirtron	59.33	36.33	23
PLCD3 (10)	Human	5p tailed mirtron	59	34	25
PPP2R1A (11)	Human	5p tailed mirtron	59	46	13
hsa-mir-4643	Human	miRNA	59	56	3
PLEKHJ1 (1)	Human	mirtron	59	13	46
hsa-mir-4417	Human	miRNA	57.75	57.42	0.33
CLDN11 (0)	Human	5p tailed mirtron	57	44	13
hsa-mir-657	Human	miRNA	57	37	20
RIPK4 (3)	Human	5p tailed mirtron	56	28	28
SPAG7 (5)	Human	5p tailed mirtron	56	40	16
hsa-mir-4671	Human	miRNA	56	50	6
hsa-mir-3675	Human	miRNA	55.73	50.53	5.2
ARL2 (1)	Human	5p tailed mirtron	55.5	19.5	36
hsa-mir-4686	Human	miRNA	55.5	47	8.5
P4HA2 (1)	Human	5p tailed mirtron	55	46	9
PISD (4)	Human	5p tailed mirtron	55	9	46
hsa-mir-4530	Human	miRNA	55	54	1
hPer (15)	Human	5p tailed mirtron	54.5	38.5	16
NADSYN1 (6)	Human	5p tailed mirtron	54	28	26
hsa-mir-4666	Human	miRNA	54	45	9
hsa-mir-4730	Human	miRNA	54	48	6
FLAD1 (4)	Human	3p tailed mirtron	53.33	30.33	23
hsa-mir-650	Human	miRNA	53.06	40.56	12.5
KIAA1543 (16)	Human	3p tailed mirtron	53	42	11
hsa-mir-3132	Human	miRNA	52.5	31.5	21
hsa-mir-4715	Human	miRNA	52.5	35	17.5
C16orf59 (7)	Human	5p tailed mirtron	52	27	25
KDM6B (12)	Human	5p tailed mirtron	52	33	19
TBC1D2 (3)	Human	5p tailed mirtron	52	37	15
hsa-mir-4744	Human	miRNA	52	49	3
hsa-mir-4438	Human	miRNA	51.5	41	10.5
hsa-mir-548f-2	Human	miRNA	51.45	45.78	5.67
hsa-mir-4452	Human	miRNA	51.36	40.36	11
hsa-mir-548f-3	Human	miRNA	51.15	45.48	5.67
hsa-mir-3668	Human	miRNA	51	48	3
hsa-mir-4460	Human	miRNA	51	38	13
hsa-mir-422a	Human	miRNA	50	28	22
hsa-mir-4465	Human	miRNA	50	27	23
hsa-mir-621	Human	miRNA	50	41	9
hsa-mir-607	Human	miRNA	49.61	44.61	5
hsa-mir-4656	Human	miRNA	48.25	31.75	16.5
hsa-mir-1233-1	Human	mirtron	48.2	1.2	47
hsa-mir-3646	Human	miRNA	48	45	3
hsa-mir-4698	Human	miRNA	48	27	21
hsa-mir-4712	Human	miRNA	48	31	17
hsa-mir-4790	Human	miRNA	48	36.5	11.5
hsa-mir-5047	Human	miRNA	47.33	45.33	2
hsa-mir-4254	Human	miRNA	46	42	4
hsa-mir-4701	Human	5p tailed mirtron	45.5	23.5	22
hsa-mir-492	Human	miRNA	45.5	37.5	8
hsa-mir-1289-2	Human	miRNA	45.3	43.3	2
hsa-mir-4776-2	Human	miRNA	44.33	18.33	26
hsa-mir-4794	Human	miRNA	44	40	4
hsa-mir-4632	Human	5p tailed mirtron	43	25	18
hsa-mir-4788	Human	miRNA	42.5	32	10.5
hsa-mir-4494	Human	miRNA	41	25	16
hsa-mir-619	Human	miRNA	40.41	38.38	2.03
hsa-mir-4776-1	Human	miRNA	40.33	17.33	23
hsa-mir-3915	Human	miRNA	40	36	4
hsa-mir-564	Human	miRNA	40	37	3
hsa-mir-4653	Human	miRNA	39.5	30.5	9
hsa-mir-4697	Human	miRNA	39	30	9
hsa-mir-3118-1	Human	miRNA	38.55	36.41	2.14
hsa-mir-3118-2	Human	miRNA	38.55	36.41	2.14
hsa-mir-3118-3	Human	miRNA	38.55	36.41	2.14
hsa-mir-3118-5	Human	miRNA	38.21	36.07	2.14
FUBP3 (10)	Human	5p tailed mirtron	38	21	17
hsa-mir-4633	Human	miRNA	38	17.5	20.5
hsa-mir-548i-1	Human	miRNA	37.51	34.48	3.03
hsa-mir-548i-4	Human	miRNA	37.29	34.26	3.03
hsa-mir-4792	Human	miRNA	37	31	6
hsa-mir-548aa-2	Human	miRNA	36.66	31.4	5.26
hsa-mir-519e	Human	miRNA	36.5	31.5	5
hsa-mir-3195	Human	miRNA	36.47	29.47	7
hsa-mir-4459	Human	miRNA	36.34	15.31	21.03
hsa-mir-4673	Human	5p tailed mirtron	36	27	9
hsa-mir-4495	Human	miRNA	36	33	3
hsa-mir-4634	Human	miRNA	36	35	1
hsa-mir-3118-4	Human	miRNA	35.96	33.82	2.14
hsa-mir-3118-6	Human	miRNA	35.96	33.82	2.14
hsa-mir-548aa-1	Human	miRNA	35.76	31.51	4.25
hsa-mir-3907	Human	miRNA	35	21	14
hsa-mir-520h	Human	miRNA	35	27.5	7.5
hsa-mir-662	Human	miRNA	35	27	8
hsa-mir-1234	Human	5p tailed mirtron	34.44	15.44	19
hsa-mir-548i-2	Human	miRNA	34.37	33.35	1.02
hsa-mir-548i-3	Human	miRNA	34.36	33.34	1.02
hsa-mir-4650-1	Human	miRNA	34	19.5	14.5
hsa-mir-4650-2	Human	miRNA	34	19.5	14.5
hsa-mir-4663	Human	miRNA	34	31	3
hsa-mir-4703	Human	miRNA	34	26	8
hsa-mir-4803	Human	miRNA	34	32	2
hsa-mir-4682	Human	miRNA	33	24	9
hsa-mir-578	Human	miRNA	32	28	4
hsa-mir-1322	Human	miRNA	31.09	29.09	2
hsa-mir-4439	Human	miRNA	31	28	3
hsa-mir-4462	Human	miRNA	31	20	11
hsa-mir-4679-1	Human	miRNA	31	25	6
hsa-mir-4679-2	Human	miRNA	31	25	6
hsa-mir-4693	Human	miRNA	30	24	6
hsa-mir-614	Human	miRNA	29.33	28.33	1
hsa-mir-1587	Human	miRNA	29.2	17.7	11.5
DDX54 (18)	Human	5p tailed mirtron	27	11	16
hsa-mir-4720	Human	miRNA	27	27	0
hsa-mir-4729	Human	miRNA	27	23	4
hsa-mir-520e	Human	miRNA	27	19	8
hsa-mir-1261	Human	miRNA	26.5	14.67	11.83
hsa-mir-4711	Human	miRNA	26	21	5
hsa-mir-1267	Human	miRNA	25.59	19.59	6
hsa-mir-4737	Human	miRNA	25.42	14.42	11
hsa-mir-2113	Human	miRNA	25	20	5
hsa-mir-4696	Human	miRNA	25	22	3
hsa-mir-802	Human	miRNA	25	21	4
hsa-mir-4509-1	Human	miRNA	24.25	22.25	2
hsa-mir-4509-2	Human	miRNA	24.25	22.25	2
hsa-mir-4509-3	Human	miRNA	24.25	22.25	2
hsa-mir-1302-3	Human	miRNA	24.06	18.7	5.36
hsa-mir-4780	Human	miRNA	24	17	7
hsa-mir-548aj-2	Human	miRNA	23.66	18.67	4.99
hsa-mir-3686	Human	miRNA	23	21	2
hsa-mir-3914-1	Human	miRNA	23	17.5	5.5
hsa-mir-4756	Human	miRNA	23	19	4
hsa-mir-4771-1	Human	miRNA	23	21	2
hsa-mir-4771-2	Human	miRNA	23	21	2
hsa-mir-936	Human	miRNA	23	16	7
hsa-mir-548ae-1	Human	miRNA	22.63	21.96	0.67
hsa-mir-550b-1	Human	miRNA	22	10.17	11.83
hsa-mir-550b-2	Human	miRNA	22	10.17	11.83
hsa-mir-593	Human	miRNA	22	22	0
hsa-mir-938	Human	miRNA	22	20	2
hsa-mir-4447	Human	miRNA	21.5	17.5	4
hsa-mir-1253	Human	miRNA	21	13	8
hsa-mir-4773-1	Human	miRNA	21	11.5	9.5
hsa-mir-4773-2	Human	miRNA	21	11.5	9.5
hsa-mir-1302-10	Human	miRNA	20.56	14.2	6.36
hsa-mir-1302-11	Human	miRNA	20.56	14.2	6.36
hsa-mir-1302-2	Human	miRNA	20.56	14.2	6.36
hsa-mir-1302-9	Human	miRNA	20.56	14.2	6.36
hsa-mir-3683	Human	miRNA	20	20	0
hsa-mir-3914-2	Human	miRNA	20	14.5	5.5
hsa-mir-5096	Human	miRNA	19.8	15.73	4.07
hsa-mir-3119-2	Human	miRNA	19.5	17	2.5
hsa-mir-3185	Human	miRNA	19	13	6
hsa-mir-609	Human	miRNA	19	12	7
hsa-mir-4537	Human	miRNA	18.84	5.84	13
hsa-mir-622	Human	miRNA	18.27	18.27	0
hsa-mir-891b	Human	miRNA	18	18	0
hsa-mir-548z	Human	miRNA	17.75	13.67	4.08
hsa-mir-518d	Human	miRNA	17.55	12.75	4.8
KDM2B (3)	Human	5p tailed mirtron	17	10	7
hsa-mir-892b	Human	miRNA	17	13	4
hsa-mir-1302-1	Human	miRNA	16.53	13.25	3.28
hsa-mir-548aj-1	Human	miRNA	16.45	13.72	2.73
hsa-mir-1302-4	Human	miRNA	16.33	13.05	3.28
hsa-mir-1302-5	Human	miRNA	16.31	13.03	3.28
hsa-mir-1302-8	Human	miRNA	16.14	12.86	3.28
hsa-mir-1302-7	Human	miRNA	16.12	12.89	3.23
hsa-mir-1302-6	Human	miRNA	16	12.72	3.28
hsa-mir-3924	Human	miRNA	16	13	3
hsa-mir-610	Human	miRNA	16	14	2
hsa-mir-555	Human	miRNA	15.5	14.5	1
hsa-mir-2117	Human	miRNA	15	14	1
hsa-mir-4486	Human	miRNA	15	14	1
hsa-mir-4694	Human	miRNA	15	14	1
hsa-mir-3178	Human	miRNA	14	12	2
hsa-mir-4289	Human	miRNA	14	12	2
hsa-mir-4678	Human	miRNA	14	14	0
hsa-mir-4681	Human	miRNA	14	11	3
hsa-mir-4692	Human	miRNA	14	12	2
hsa-mir-526a-1	Human	miRNA	13.55	8.75	4.8
hsa-mir-3119-1	Human	miRNA	13.5	12	1.5
hsa-mir-5095	Human	miRNA	13.04	13.02	0.02
hsa-mir-367	Human	miRNA	13	9	4
hsa-mir-4675	Human	miRNA	13	8	5
hsa-mir-3135b	Human	miRNA	12.93	2.43	10.5
hsa-mir-4514	Human	miRNA	12.5	11.5	1
hsa-mir-603	Human	miRNA	12.19	10.19	2
hsa-mir-3142	Human	miRNA	12	9.33	2.67
hsa-mir-3169	Human	miRNA	12	9	3
hsa-mir-3921	Human	miRNA	12	12	0
hsa-mir-4759	Human	miRNA	12	9.5	2.5
hsa-mir-1273f	Human	miRNA	11.27	9.22	2.05
hsa-mir-451b	Human	miRNA	11	10	1
hsa-mir-4539	Human	miRNA	10.29	5.29	5
hsa-mir-4419a	Human	miRNA	9.44	7.42	2.02
hsa-mir-4418	Human	miRNA	9	9	0
hsa-mir-4704	Human	miRNA	9	8	1
hsa-mir-4719	Human	miRNA	9	8	1
hsa-mir-587	Human	miRNA	9	8	1
hsa-mir-1238	Human	mirtron	9	8	1
hsa-mir-4463	Human	miRNA	8.75	6.08	2.67
hsa-mir-3621	Human	miRNA	8	7	1
hsa-mir-4752	Human	miRNA	8	6	2
hsa-mir-4801	Human	miRNA	8	6	2
hsa-mir-637	Human	miRNA	8	8	0
hsa-mir-764	Human	miRNA	8	5	3
hsa-mir-922	Human	miRNA	8	8	0
hsa-mir-3665	Human	miRNA	7.99	3.87	4.12
hsa-mir-4499	Human	miRNA	7.75	7.75	0
hsa-mir-548g	Human	miRNA	7.1	4.82	2.28
hsa-mir-1204	Human	miRNA	7	7	0
hsa-mir-147	Human	miRNA	7	5	2
hsa-mir-198	Human	miRNA	7	7	0
hsa-mir-298	Human	miRNA	7	5	2
hsa-mir-3937	Human	miRNA	7	5	2
hsa-mir-4317	Human	miRNA	7	7	0
hsa-mir-4497	Human	miRNA	7	5	2
hsa-mir-633	Human	miRNA	7	7	0
hsa-mir-3196	Human	miRNA	6.64	4.31	2.33
hsa-mir-1972-1	Human	miRNA	6.58	3.55	3.03
hsa-mir-1972-2	Human	miRNA	6.58	3.55	3.03
hsa-mir-4328	Human	miRNA	6.5	1.5	5
hsa-mir-4468	Human	miRNA	6.5	5.5	1
hsa-mir-4538	Human	miRNA	6.5	2.5	4
hsa-mir-3960	Human	miRNA	6.46	3.76	2.7
hsa-mir-558	Human	miRNA	6.29	6.29	0
hsa-mir-1273g	Human	miRNA	6.05	4.01	2.04
hsa-mir-4718	Human	miRNA	6	6	0
hsa-mir-526a-2	Human	miRNA	5.55	4.75	0.8
hsa-mir-631	Human	miRNA	5.5	3.5	2
hsa-mir-620	Human	miRNA	5.1	5.1	0
hsa-mir-548m	Human	miRNA	5.01	4.01	1
hsa-mir-1297	Human	miRNA	5	0	5
hsa-mir-4531	Human	miRNA	5	5	0
hsa-mir-297	Human	miRNA	4.74	4.74	0
hsa-mir-1233-2	Human	miRNA	4.6	1.32	3.28
hsa-mir-4500	Human	miRNA	4.5	0.5	4
hsa-mir-2861	Human	miRNA	4.33	3.33	1
hsa-mir-548f-5	Human	miRNA	4.28	1.11	3.17
hsa-mir-1178	Human	5p tailed mirtron	4	3	1
hsa-mir-1178	Human	miRNA	4	3	1
hsa-mir-1182	Human	miRNA	4	1	3
hsa-mir-1539	Human	miRNA	4	4	0
hsa-mir-1825	Human	miRNA	4	4	0
hsa-mir-302e	Human	miRNA	4	0	4
hsa-mir-3650	Human	miRNA	4	4	0
hsa-mir-3689d-2	Human	miRNA	4	2.5	1.5
hsa-mir-384	Human	miRNA	4	0	4
hsa-mir-3920	Human	miRNA	4	3	1
hsa-mir-4483	Human	miRNA	4	3	1
hsa-mir-630	Human	miRNA	4	4	0
hsa-mir-718	Human	miRNA	4	2	2
hsa-mir-566	Human	miRNA	3.78	3.76	0.02
hsa-mir-4315-1	Human	miRNA	3.5	3.5	0
hsa-mir-4315-2	Human	miRNA	3.5	3.5	0
hsa-mir-572	Human	miRNA	3.5	3.5	0
hsa-mir-3658	Human	miRNA	3.33	3.33	0
hsa-mir-3673	Human	miRNA	3.18	1.18	2
hsa-mir-567	Human	miRNA	3.05	2.05	1
hsa-mir-3671	Human	miRNA	3	3	0
hsa-mir-3689d-1	Human	miRNA	3	1.5	1.5
hsa-mir-3976	Human	miRNA	3	1	2
hsa-mir-4262	Human	miRNA	3	0	3
hsa-mir-4263	Human	miRNA	3	3	0
hsa-mir-4540	Human	miRNA	3	3	0
hsa-mir-569	Human	miRNA	3	3	0
hsa-mir-575	Human	miRNA	3	3	0
hsa-mir-617	Human	miRNA	3	3	0
hsa-mir-4472-2	Human	miRNA	2.76	0.76	2
hsa-mir-595	Human	miRNA	2.5	1.5	1
hsa-mir-646	Human	miRNA	2.33	2.33	0
hsa-mir-640	Human	miRNA	2.02	1.02	1
hsa-mir-1281	Human	miRNA	2	1	1
hsa-mir-3649	Human	miRNA	2	2	0
hsa-mir-3975	Human	miRNA	2	2	0
hsa-mir-4292	Human	miRNA	2	2	0
hsa-mir-4309	Human	miRNA	2	0	2
hsa-mir-4325	Human	miRNA	2	0	2
hsa-mir-4478	Human	miRNA	2	2	0
hsa-mir-4535	Human	miRNA	2	2	0
hsa-mir-591	Human	miRNA	2	2	0
hsa-mir-601	Human	miRNA	2	2	0
hsa-mir-623	Human	miRNA	2	2	0
hsa-mir-4441	Human	miRNA	1.87	0.87	1
hsa-mir-644	Human	miRNA	1.83	1.83	0
hsa-mir-1321	Human	miRNA	1.58	0.58	1
hsa-mir-4455	Human	miRNA	1.58	0.58	1
hsa-mir-634	Human	miRNA	1.33	1.33	0
hsa-mir-325	Human	miRNA	1.1	1.1	0
hsa-mir-1184-1	Human	miRNA	1	1	0
hsa-mir-1184-2	Human	miRNA	1	1	0
hsa-mir-1184-3	Human	miRNA	1	1	0
hsa-mir-1206	Human	miRNA	1	1	0
hsa-mir-1324	Human	miRNA	1	1	0
hsa-mir-1469	Human	miRNA	1	1	0
hsa-mir-300	Human	miRNA	1	1	0
hsa-mir-3182	Human	miRNA	1	1	0
hsa-mir-3978	Human	miRNA	1	1	0
hsa-mir-4258	Human	miRNA	1	1	0
hsa-mir-4259	Human	miRNA	1	1	0
hsa-mir-4285	Human	miRNA	1	1	0
hsa-mir-4295	Human	miRNA	1	1	0
hsa-mir-4308	Human	miRNA	1	1	0
hsa-mir-4472-1	Human	miRNA	1	0	1
hsa-mir-4534	Human	miRNA	1	0	1
hsa-mir-553	Human	miRNA	1	1	0
hsa-mir-554	Human	miRNA	1	1	0
hsa-mir-596	Human	miRNA	1	1	0
hsa-mir-606	Human	miRNA	1	1	0
hsa-mir-613	Human	miRNA	1	1	0
hsa-mir-635	Human	miRNA	1	1	0
hsa-mir-638	Human	miRNA	1	1	0
hsa-mir-645	Human	miRNA	1	1	0
hsa-mir-648	Human	miRNA	1	1	0
hsa-mir-661	Human	miRNA	1	0	1
hsa-mir-761	Human	miRNA	1	1	0
hsa-mir-3670	Human	miRNA	0.75	0.75	0
hsa-mir-3669	Human	miRNA	0.52	0.52	0
hsa-mir-1207	Human	miRNA	0.5	0.5	0
hsa-mir-4312	Human	miRNA	0.5	0.5	0
hsa-mir-4323	Human	miRNA	0.5	0.5	0
hsa-mir-711	Human	miRNA	0.5	0.5	0
hsa-mir-3674	Human	miRNA	0.42	0.42	0
hsa-mir-4298	Human	miRNA	0.12	0.12	0
hsa-mir-649	Human	miRNA	0.04	0.04	0
hsa-mir-562	Human	miRNA	0.01	0.01	0
hsa-mir-103b-1	Human	miRNA	0	0	0
hsa-mir-103b-2	Human	miRNA	0	0	0
hsa-mir-1183	Human	miRNA	0	0	0
hsa-mir-1200	Human	miRNA	0	0	0
hsa-mir-1202	Human	miRNA	0	0	0
hsa-mir-1203	Human	miRNA	0	0	0
hsa-mir-1205	Human	miRNA	0	0	0
hsa-mir-1208	Human	miRNA	0	0	0
hsa-mir-1279	Human	miRNA	0	0	0
hsa-mir-1282	Human	miRNA	0	0	0
hsa-mir-1470	Human	miRNA	0	0	0
hsa-mir-1471	Human	miRNA	0	0	0
hsa-mir-2052	Human	miRNA	0	0	0
hsa-mir-2053	Human	miRNA	0	0	0
hsa-mir-2054	Human	miRNA	0	0	0
hsa-mir-2909	Human	miRNA	0	0	0
hsa-mir-302f	Human	miRNA	0	0	0
hsa-mir-3123	Human	miRNA	0	0	0
hsa-mir-3201	Human	miRNA	0	0	0
hsa-mir-3666	Human	miRNA	0	0	0
hsa-mir-3713	Human	miRNA	0	0	0
hsa-mir-3714	Human	miRNA	0	0	0
hsa-mir-3972	Human	miRNA	0	0	0
hsa-mir-3973	Human	miRNA	0	0	0
hsa-mir-3974	Human	miRNA	0	0	0
hsa-mir-3977	Human	miRNA	0	0	0
hsa-mir-4251	Human	miRNA	0	0	0
hsa-mir-4252	Human	miRNA	0	0	0
hsa-mir-4253	Human	miRNA	0	0	0
hsa-mir-4255	Human	miRNA	0	0	0
hsa-mir-4256	Human	miRNA	0	0	0
hsa-mir-4257	Human	miRNA	0	0	0
hsa-mir-4260	Human	miRNA	0	0	0
hsa-mir-4261	Human	miRNA	0	0	0
hsa-mir-4264	Human	miRNA	0	0	0
hsa-mir-4265	Human	miRNA	0	0	0
hsa-mir-4266	Human	miRNA	0	0	0
hsa-mir-4267	Human	miRNA	0	0	0
hsa-mir-4268	Human	miRNA	0	0	0
hsa-mir-4269	Human	miRNA	0	0	0
hsa-mir-4270	Human	miRNA	0	0	0
hsa-mir-4271	Human	miRNA	0	0	0
hsa-mir-4272	Human	miRNA	0	0	0
hsa-mir-4273	Human	miRNA	0	0	0
hsa-mir-4274	Human	miRNA	0	0	0
hsa-mir-4275	Human	miRNA	0	0	0
hsa-mir-4276	Human	miRNA	0	0	0
hsa-mir-4277	Human	miRNA	0	0	0
hsa-mir-4278	Human	miRNA	0	0	0
hsa-mir-4279	Human	miRNA	0	0	0
hsa-mir-4280	Human	miRNA	0	0	0
hsa-mir-4281	Human	miRNA	0	0	0
hsa-mir-4282	Human	miRNA	0	0	0
hsa-mir-4283-1	Human	miRNA	0	0	0
hsa-mir-4283-2	Human	miRNA	0	0	0
hsa-mir-4287	Human	miRNA	0	0	0
hsa-mir-4288	Human	miRNA	0	0	0
hsa-mir-4290	Human	miRNA	0	0	0
hsa-mir-4291	Human	miRNA	0	0	0
hsa-mir-4293	Human	miRNA	0	0	0
hsa-mir-4294	Human	miRNA	0	0	0
hsa-mir-4296	Human	miRNA	0	0	0
hsa-mir-4297	Human	miRNA	0	0	0
hsa-mir-4299	Human	miRNA	0	0	0
hsa-mir-4300	Human	miRNA	0	0	0
hsa-mir-4301	Human	miRNA	0	0	0
hsa-mir-4302	Human	miRNA	0	0	0
hsa-mir-4303	Human	miRNA	0	0	0
hsa-mir-4304	Human	miRNA	0	0	0
hsa-mir-4305	Human	miRNA	0	0	0
hsa-mir-4307	Human	miRNA	0	0	0
hsa-mir-4310	Human	miRNA	0	0	0
hsa-mir-4311	Human	miRNA	0	0	0
hsa-mir-4313	Human	miRNA	0	0	0
hsa-mir-4314	Human	miRNA	0	0	0
hsa-mir-4316	Human	miRNA	0	0	0
hsa-mir-4318	Human	miRNA	0	0	0
hsa-mir-4319	Human	miRNA	0	0	0
hsa-mir-4320	Human	miRNA	0	0	0
hsa-mir-4321	Human	miRNA	0	0	0
hsa-mir-4322	Human	miRNA	0	0	0
hsa-mir-4327	Human	miRNA	0	0	0
hsa-mir-4329	Human	miRNA	0	0	0
hsa-mir-4330	Human	miRNA	0	0	0
hsa-mir-4456	Human	miRNA	0	0	0
hsa-mir-4481	Human	miRNA	0	0	0
hsa-mir-557	Human	miRNA	0	0	0
hsa-mir-563	Human	miRNA	0	0	0
hsa-mir-568	Human	miRNA	0	0	0
hsa-mir-571	Human	miRNA	0	0	0
hsa-mir-583	Human	miRNA	0	0	0
hsa-mir-604	Human	miRNA	0	0	0
hsa-mir-608	Human	miRNA	0	0	0
hsa-mir-626	Human	miRNA	0	0	0
hsa-mir-647	Human	miRNA	0	0	0
hsa-mir-759	Human	miRNA	0	0	0
hsa-mir-762	Human	miRNA	0	0	0
hsa-mir-920	Human	miRNA	0	0	0
hsa-mir-921	Human	miRNA	0	0	0
hsa-mir-924	Human	miRNA	0	0	0

## Sheet: mouse miRNAs
Locus	Species	Type	Total	Perfect miRNA/star	3' Trimmed miRNA/star
mmu-let-7f-2	Mouse	miRNA	3.08352e+07	2.76626e+07	3.17256e+06
mmu-let-7f-1	Mouse	miRNA	2.74545e+07	2.43126e+07	3.1419e+06
mmu-mir-122	Mouse	miRNA	2.53317e+07	1.87557e+07	6.57601e+06
mmu-mir-21	Mouse	miRNA	2.17904e+07	20211385	1.579e+06
mmu-mir-215	Mouse	miRNA	1.69544e+07	1.55967e+07	1357755
mmu-let-7c-2	Mouse	miRNA	1.64412e+07	1.38267e+07	2.61447e+06
mmu-let-7c-1	Mouse	miRNA	1.63205e+07	1.37012e+07	2.61925e+06
mmu-let-7a-1	Mouse	miRNA	1.43497e+07	1.20468e+07	2.30291e+06
mmu-let-7a-2	Mouse	miRNA	1.42816e+07	1.19779e+07	2.30373e+06
mmu-let-7b	Mouse	miRNA	1.29601e+07	7.92697e+06	5.03315e+06
mmu-mir-192	Mouse	miRNA	1.0453e+07	7.54363e+06	2909350
mmu-let-7g	Mouse	miRNA	1.03985e+07	9.17857e+06	1.21997e+06
mmu-mir-1a-2	Mouse	miRNA	9.91753e+06	9.37583e+06	541706
mmu-mir-1a-1	Mouse	miRNA	9.91737e+06	9.37568e+06	541696
mmu-mir-140	Mouse	miRNA	9.08915e+06	5880391	3.20876e+06
mmu-let-7d	Mouse	miRNA	8.84569e+06	7.65891e+06	1186781
mmu-let-7i	Mouse	miRNA	8.50902e+06	5.24713e+06	3261887
mmu-mir-29a	Mouse	miRNA	8.04209e+06	7.44826e+06	593822
mmu-mir-22	Mouse	miRNA	6.05237e+06	5.84598e+06	206392
mmu-mir-378	Mouse	miRNA	5.57287e+06	3.65695e+06	1.91593e+06
mmu-mir-295	Mouse	miRNA	5555774	4.66742e+06	888356
mmu-mir-191	Mouse	miRNA	5.36057e+06	4.66972e+06	690856
mmu-mir-143	Mouse	miRNA	5.26024e+06	3.14519e+06	2.11505e+06
mmu-mir-103-2	Mouse	miRNA	5.22963e+06	4.38548e+06	844152
mmu-mir-103-1	Mouse	miRNA	5.13149e+06	4.29506e+06	836431
mmu-mir-294	Mouse	miRNA	4.63015e+06	4.50187e+06	128277
mmu-mir-17	Mouse	miRNA	4.62234e+06	3.86746e+06	754880
mmu-mir-16-1	Mouse	miRNA	4.25869e+06	3.9066e+06	352086
mmu-mir-16-2	Mouse	miRNA	4.20676e+06	3.85927e+06	347488
mmu-mir-92a-1	Mouse	miRNA	4.16212e+06	3.73474e+06	427386
mmu-mir-20a	Mouse	miRNA	3.78592e+06	2.95282e+06	833098
mmu-mir-25	Mouse	miRNA	3719522	3260091	459431
mmu-mir-142	Mouse	miRNA	3.70937e+06	3.22492e+06	484453
mmu-mir-293	Mouse	miRNA	3.63873e+06	3.52283e+06	115896
mmu-mir-24-2	Mouse	miRNA	3.29583e+06	1.41915e+06	1.87668e+06
mmu-mir-24-1	Mouse	miRNA	3.24191e+06	1.36798e+06	1.87393e+06
mmu-mir-127	Mouse	miRNA	3.15263e+06	2.36748e+06	785153
mmu-mir-30e	Mouse	miRNA	3.07682e+06	2.65569e+06	421133
mmu-mir-26a-2	Mouse	miRNA	2.97629e+06	2.26332e+06	712972
mmu-mir-26a-1	Mouse	miRNA	2.97403e+06	2.26127e+06	712762
mmu-mir-30a	Mouse	miRNA	2957869	2582299	375570
mmu-mir-101b	Mouse	miRNA	2.76519e+06	2.31384e+06	451355
mmu-mir-291a	Mouse	miRNA	2.61768e+06	2.33872e+06	278965
mmu-let-7e	Mouse	miRNA	2.60781e+06	1.79081e+06	817007
mmu-mir-30d	Mouse	miRNA	2484280	2.18923e+06	295048
mmu-mir-423	Mouse	miRNA	2.45476e+06	2.12023e+06	334531
mmu-mir-182	Mouse	miRNA	2.44231e+06	2.32513e+06	117176
mmu-mir-451	Mouse	miRNA	2406538	2.32885e+06	77689.5
mmu-mir-148a	Mouse	miRNA	2.16733e+06	1.99992e+06	167413
mmu-mir-292	Mouse	miRNA	2164235	1883231	281004
mmu-mir-9-3	Mouse	miRNA	2.12934e+06	1.91387e+06	215463
mmu-mir-9-1	Mouse	miRNA	2.12834e+06	1.91314e+06	215206
mmu-mir-9-2	Mouse	miRNA	2.12821e+06	1.91301e+06	215200
mmu-mir-181a-1	Mouse	miRNA	2114303	1858233	256070
mmu-mir-26b	Mouse	miRNA	2.07801e+06	1.66669e+06	411318
mmu-mir-181a-2	Mouse	miRNA	2.06599e+06	1.81553e+06	250467
mmu-mir-93	Mouse	miRNA	2.0515e+06	1.7177e+06	333805
mmu-mir-27b	Mouse	miRNA	2.01491e+06	1.61881e+06	396101
mmu-mir-130a	Mouse	miRNA	2.00297e+06	1.51104e+06	491937
mmu-mir-221	Mouse	miRNA	1.99063e+06	1.58219e+06	408438
mmu-mir-375	Mouse	miRNA	1850548	1484656	365892
mmu-mir-34c	Mouse	miRNA	1.71105e+06	1.59728e+06	113773
mmu-mir-322	Mouse	miRNA	1.69178e+06	957664	734111
mmu-mir-199a-2	Mouse	miRNA	1.5852e+06	1.28393e+06	301269
mmu-mir-15b	Mouse	miRNA	1.58302e+06	1.47873e+06	104291
mmu-mir-199a-1	Mouse	miRNA	1.58229e+06	1.2813e+06	300997
mmu-mir-107	Mouse	miRNA	1574898	1.25795e+06	316949
mmu-mir-92a-2	Mouse	miRNA	1.57304e+06	1476679	96363.5
mmu-mir-379	Mouse	miRNA	1548851	1.37572e+06	173134
mmu-mir-106b	Mouse	miRNA	1.53446e+06	1.36791e+06	166554
mmu-mir-126	Mouse	miRNA	1507620	1.22631e+06	281314
mmu-mir-29b-2	Mouse	miRNA	1.49214e+06	1.39558e+06	96559.2
mmu-mir-222	Mouse	miRNA	1.48896e+06	1.21666e+06	272296
mmu-mir-29b-1	Mouse	miRNA	1.45977e+06	1.36513e+06	94637.7
mmu-mir-199b	Mouse	miRNA	1.45637e+06	1.16856e+06	287802
mmu-mir-7a-1	Mouse	miRNA	1.45111e+06	1.34358e+06	107530
mmu-mir-125b-1	Mouse	miRNA	1.41668e+06	1.29655e+06	120132
mmu-mir-1839	Mouse	miRNA	1.40387e+06	1.06498e+06	338887
mmu-mir-125b-2	Mouse	miRNA	1.40042e+06	1.28948e+06	110946
mmu-mir-101a	Mouse	miRNA	1.39625e+06	1.02989e+06	366364
mmu-mir-7a-2	Mouse	miRNA	1.39381e+06	1.29088e+06	102929
mmu-mir-541	Mouse	miRNA	1376921	1.23403e+06	142887
mmu-mir-411	Mouse	miRNA	1343781	1251152	92629
mmu-mir-23a	Mouse	miRNA	1.2592e+06	960407	298789
mmu-mir-152	Mouse	miRNA	1.25358e+06	727731	525844
mmu-mir-99a	Mouse	miRNA	1215102	846632	368470
mmu-mir-15a	Mouse	miRNA	1.13337e+06	825766	307601
mmu-mir-18a	Mouse	miRNA	1.06979e+06	902872	166914
mmu-mir-185	Mouse	miRNA	1.06832e+06	765858	302457
mmu-mir-183	Mouse	miRNA	1.06668e+06	963188	103494
mmu-mir-128-1	Mouse	miRNA	1043088	901706	141382
mmu-mir-27a	Mouse	miRNA	1.04069e+06	755177	285515
mmu-mir-23b	Mouse	miRNA	951156	562168	388988
mmu-mir-10a	Mouse	miRNA	936257	825914	110343
mmu-mir-30c-2	Mouse	miRNA	933214	860407	72807.2
mmu-mir-30c-1	Mouse	miRNA	903129	833900	69228.8
mmu-mir-186	Mouse	miRNA	899572	797989	101583
mmu-mir-200b	Mouse	miRNA	896354	618087	278267
mmu-mir-130b	Mouse	miRNA	890748	759161	131587
mmu-mir-434	Mouse	miRNA	889976	864622	25354.5
mmu-mir-136	Mouse	miRNA	866419	811174	55245.2
mmu-mir-19b-1	Mouse	miRNA	864493	797673	66819.8
mmu-mir-31	Mouse	miRNA	856925	682740	174185
mmu-mir-19b-2	Mouse	miRNA	855897	790206	65690.8
mmu-mir-99b	Mouse	miRNA	842509	673104	169405
mmu-mir-19a	Mouse	miRNA	835542	799457	36085.7
mmu-mir-125a	Mouse	miRNA	823405	739061	84343.8
mmu-mir-744	Mouse	miRNA	769754	484554	285201
mmu-mir-202	Mouse	miRNA	733106	709283	23823
mmu-mir-200c	Mouse	miRNA	720760	613468	107293
mmu-mir-335	Mouse	miRNA	709946	667998	41948.8
mmu-mir-340	Mouse	miRNA	700661	650358	50303
mmu-mir-181b-2	Mouse	miRNA	695175	519660	175516
mmu-mir-124-2	Mouse	miRNA	672046	538622	133423
mmu-mir-124-1	Mouse	miRNA	671899	538474	133424
mmu-mir-124-3	Mouse	miRNA	671836	538420	133416
mmu-mir-145	Mouse	miRNA	657393	576269	81124.6
mmu-mir-194-2	Mouse	miRNA	653127	517341	135786
mmu-mir-223	Mouse	miRNA	634867	304396	330472
mmu-mir-652	Mouse	miRNA	620975	119639	501336
mmu-mir-137	Mouse	miRNA	607909	567674	40235.1
mmu-mir-381	Mouse	miRNA	605189	582167	23022
mmu-mir-206	Mouse	miRNA	604055	561869	42186
mmu-mir-128-2	Mouse	miRNA	596410	472834	123576
mmu-mir-96	Mouse	miRNA	595360	581082	14278
mmu-mir-181b-1	Mouse	miRNA	570340	428539	141801
mmu-mir-376a	Mouse	miRNA	568638	501014	67623.5
mmu-mir-290	Mouse	miRNA	563787	502415	61372
mmu-mir-148b	Mouse	miRNA	550062	368915	181148
mmu-mir-151	Mouse	miRNA	537944	427820	110124
mmu-mir-138-1	Mouse	miRNA	533364	464000	69364.5
mmu-mir-28	Mouse	miRNA	521028	444918	76109.5
mmu-mir-196b	Mouse	miRNA	516417	372541	143876
mmu-mir-20b	Mouse	miRNA	510484	421832	88651.5
mmu-mir-300	Mouse	miRNA	509925	309125	200800
mmu-mir-425	Mouse	miRNA	501345	446369	54976
mmu-mir-30b	Mouse	miRNA	498871	454394	44477.7
mmu-mir-503	Mouse	miRNA	492323	439437	52886.5
mmu-mir-708	Mouse	miRNA	487313	410237	77076.8
mmu-mir-132	Mouse	miRNA	484841	396037	88804
mmu-mir-29c	Mouse	miRNA	482448	443297	39150.7
mmu-mir-298	Mouse	miRNA	477155	248588	228567
mmu-mir-181d	Mouse	miRNA	469416	329291	140126
mmu-mir-369	Mouse	miRNA	452977	415684	37293
mmu-mir-200a	Mouse	miRNA	450674	358153	92521
mmu-mir-672	Mouse	miRNA	447549	409920	37629
mmu-mir-194-1	Mouse	miRNA	444790	366136	78654.5
mmu-mir-34a	Mouse	miRNA	444515	372761	71754
mmu-mir-376b	Mouse	miRNA	443773	395032	48741.2
mmu-mir-138-2	Mouse	miRNA	443512	383216	60296
mmu-mir-342	Mouse	miRNA	429172	357223	71948.3
mmu-mir-146a	Mouse	miRNA	424517	245852	178665
mmu-mir-10b	Mouse	miRNA	419308	390458	28850
mmu-mir-134	Mouse	miRNA	417064	274479	142584
mmu-mir-301a	Mouse	miRNA	396489	363637	32852.2
mmu-mir-499	Mouse	miRNA	381564	358701	22863
mmu-mir-34b	Mouse	miRNA	377926	364798	13127.5
mmu-mir-100	Mouse	miRNA	373407	284212	89195.2
mmu-mir-150	Mouse	miRNA	364175	215599	148576
mmu-mir-106a	Mouse	miRNA	351800	267609	84191
mmu-mir-382	Mouse	miRNA	343729	307126	36603
mmu-mir-139	Mouse	miRNA	339820	277978	61841.7
mmu-mir-872	Mouse	miRNA	337358	302171	35186.1
mmu-mir-218-2	Mouse	miRNA	335930	244957	90973.2
mmu-mir-181c	Mouse	miRNA	325050	292048	33002
mmu-mir-669c	Mouse	miRNA	319433	295323	24110.4
mmu-mir-146b	Mouse	miRNA	316928	199014	117914
mmu-mir-98	Mouse	miRNA	310753	262955	47798.2
mmu-mir-214	Mouse	miRNA	308077	171853	136225
mmu-mir-203	Mouse	miRNA	307876	235121	72754.2
mmu-mir-218-1	Mouse	miRNA	303194	223405	79788.7
mmu-mir-210	Mouse	miRNA	267216	190102	77114
mmu-mir-33	Mouse	miRNA	253771	223696	30074.5
mmu-mir-5105	Mouse	miRNA	251645	223291	28354.2
mmu-mir-155	Mouse	miRNA	249838	198201	51637.5
mmu-mir-433	Mouse	miRNA	245686	185865	59821
mmu-mir-195	Mouse	miRNA	239219	207016	32203
mmu-mir-296	Mouse	miRNA	233028	161816	71212.1
mmu-mir-431	Mouse	miRNA	229062	170716	58346
mmu-mir-674	Mouse	miRNA	226644	160592	66051.7
mmu-mir-374	Mouse	miRNA	226460	196950	29509.3
mmu-mir-154	Mouse	miRNA	225424	204658	20766
mmu-mir-351	Mouse	miRNA	221223	92077.4	129146
mmu-mir-144	Mouse	miRNA	218655	207180	11475.5
mmu-mir-363	Mouse	miRNA	210325	162627	47698
mmu-mir-135b	Mouse	miRNA	208769	190493	18275.7
mmu-mir-361	Mouse	miRNA	208412	139604	68808
mmu-mir-32	Mouse	miRNA	204426	193781	10645.2
mmu-mir-532	Mouse	miRNA	203530	169763	33767
mmu-mir-324	Mouse	miRNA	199286	136735	62550.8
mmu-mir-345	Mouse	miRNA	199280	124667	74613.5
mmu-mir-217	Mouse	miRNA	199244	178339	20904.5
mmu-mir-410	Mouse	miRNA	197055	178985	18070.2
mmu-mir-376c	Mouse	miRNA	195615	180654	14961.5
mmu-mir-1983	Mouse	miRNA	194421	135906	58514.4
mmu-mir-743b	Mouse	miRNA	190860	170505	20355
mmu-mir-129-2	Mouse	miRNA	187993	172332	15660.5
mmu-mir-409	Mouse	miRNA	187444	149289	38155
mmu-mir-153	Mouse	miRNA	185818	176187	9631.17
mmu-mir-141	Mouse	miRNA	183687	157723	25964
mmu-mir-133a-2	Mouse	miRNA	183246	164610	18635.8
mmu-mir-133a-1	Mouse	miRNA	183222	164554	18667.6
mmu-mir-1981	Mouse	mirtron	167942	126287	41655
mmu-mir-219-2	Mouse	miRNA	156104	138901	17202.5
mmu-mir-380	Mouse	miRNA	155632	143556	12076
mmu-mir-338	Mouse	miRNA	152565	143061	9504
mmu-mir-741	Mouse	miRNA	147224	138042	9182.5
mmu-mir-467e	Mouse	miRNA	138287	131148	7139.84
mmu-mir-92b	Mouse	miRNA	135742	82629.5	53113
mmu-mir-302b	Mouse	miRNA	134435	124261	10174.3
mmu-mir-383	Mouse	miRNA	134174	105743	28430.8
mmu-mir-341	Mouse	miRNA	132768	100685	32083
mmu-mir-497	Mouse	miRNA	128762	109864	18897.7
mmu-mir-196a-2	Mouse	miRNA	128283	101586	26697.3
mmu-mir-337	Mouse	miRNA	127986	113489	14497
mmu-mir-5117	Mouse	miRNA	123602	116034	7568
mmu-mir-299	Mouse	miRNA	123004	105762	17242
mmu-mir-486	Mouse	miRNA	120020	56357.2	63662.8
mmu-mir-205	Mouse	miRNA	119599	97210	22389
mmu-mir-881	Mouse	miRNA	118344	106829	11514.8
mmu-mir-429	Mouse	miRNA	118175	101761	16414
mmu-mir-377	Mouse	miRNA	116262	110258	6003.33
mmu-mir-467c	Mouse	miRNA	115657	107563	8093.14
mmu-mir-330	Mouse	miRNA	112845	84026.5	28818.3
mmu-mir-184	Mouse	miRNA	108477	85787.2	22689.5
mmu-mir-500	Mouse	miRNA	107854	85730.4	22123.7
mmu-mir-216a	Mouse	miRNA	105812	88337	17475.5
mmu-mir-362	Mouse	miRNA	105482	87323	18158.5
mmu-mir-598	Mouse	miRNA	105225	96203.3	9022
mmu-mir-339	Mouse	miRNA	100970	75895	25075.3
mmu-mir-187	Mouse	miRNA	100937	63504.5	37432.5
mmu-mir-449a	Mouse	miRNA	99193.7	87341.7	11852
mmu-mir-135a-1	Mouse	miRNA	99164	86029.5	13134.5
mmu-mir-487b	Mouse	miRNA	98795.3	87912.8	10882.5
mmu-mir-542	Mouse	miRNA	98644.7	83586.2	15058.5
mmu-mir-665	Mouse	miRNA	98628.6	50941.9	47686.7
mmu-mir-193	Mouse	miRNA	98477.2	62523.2	35954
mmu-mir-3107	Mouse	miRNA	97616	40919.2	56696.8
mmu-mir-743a	Mouse	miRNA	96576	87222	9354
mmu-mir-149	Mouse	miRNA	95399.9	83727.4	11672.5
mmu-mir-135a-2	Mouse	miRNA	95108	83791.5	11316.5
mmu-mir-129-1	Mouse	miRNA	94857.5	81005	13852.5
mmu-mir-328	Mouse	miRNA	94618.2	60194.2	34424
mmu-mir-540	Mouse	miRNA	92095.1	73764.1	18331
mmu-mir-196a-1	Mouse	miRNA	92074.3	72617.8	19456.5
mmu-mir-494	Mouse	miRNA	88911	81838	7073
mmu-mir-495	Mouse	miRNA	88225.5	80695.5	7530
mmu-mir-7b	Mouse	miRNA	87535.5	83079.2	4456.33
mmu-mir-871	Mouse	miRNA	86777.8	77336.8	9441
mmu-mir-467d	Mouse	miRNA	85778.5	79374.9	6403.61
mmu-mir-3068	Mouse	miRNA	85764.8	78979.8	6785
mmu-mir-676	Mouse	miRNA	82802.8	69885.9	12916.8
mmu-mir-133b	Mouse	miRNA	82662.9	70962.2	11700.8
mmu-mir-331	Mouse	miRNA	82217	45027.8	37189.1
mmu-mir-384	Mouse	miRNA	81599	77290.7	4308.33
mmu-mir-501	Mouse	miRNA	81415.8	59588.5	21827.3
mmu-mir-370	Mouse	miRNA	81328.6	64981.2	16347.3
mmu-mir-880	Mouse	miRNA	77895	71359	6536
mmu-mir-485	Mouse	miRNA	76947	63839.5	13107.5
mmu-mir-421	Mouse	miRNA	75767.1	56483.1	19284
mmu-mir-350	Mouse	miRNA	75540.2	70610.8	4929.5
mmu-mir-204	Mouse	miRNA	74684.2	62990	11694.2
mmu-mir-344-1	Mouse	miRNA	73994.5	70565.7	3428.83
mmu-mir-344-2	Mouse	miRNA	73993.5	70564.7	3428.83
mmu-mir-5109	Mouse	miRNA	69625.5	67556.6	2068.83
mmu-mir-216b	Mouse	miRNA	69359.7	58676	10683.7
mmu-mir-3065	Mouse	miRNA	68888.8	20836.3	48052.5
mmu-mir-302a	Mouse	miRNA	67689.3	64948	2741.33
mmu-mir-671	Mouse	miRNA	66583.5	39484.9	27098.6
mmu-mir-212	Mouse	miRNA	65705.7	45473.6	20232.1
mmu-mir-543	Mouse	miRNA	62794	55376	7418
mmu-mir-323	Mouse	miRNA	61706	54309	7397
mmu-mir-465a	Mouse	miRNA	61404.7	56722.9	4681.82
mmu-mir-673	Mouse	miRNA	61084.6	53001.6	8083
mmu-mir-291b	Mouse	miRNA	60424.7	47381.2	13043.5
mmu-mir-301b	Mouse	miRNA	59009.5	52135	6874.5
mmu-mir-224	Mouse	miRNA	58388	53416	4972
mmu-mir-483	Mouse	miRNA	57190.4	46060.1	11130.3
mmu-mir-455	Mouse	miRNA	56203.4	43959.4	12244
mmu-mir-190	Mouse	miRNA	55289	49139.7	6149.33
mmu-mir-450a-1	Mouse	miRNA	52221	49610.8	2610.2
mmu-mir-193b	Mouse	miRNA	52151.5	42298.5	9853
mmu-mir-468	Mouse	miRNA	51904.6	45971.6	5933
mmu-mir-450a-2	Mouse	miRNA	51513.5	49078.5	2435
mmu-mir-470	Mouse	miRNA	51233.5	45856.5	5377
mmu-mir-465c-1	Mouse	miRNA	51206.3	37852.5	13353.8
mmu-mir-465c-2	Mouse	miRNA	51206.3	37852.5	13353.8
mmu-mir-664	Mouse	miRNA	47115.5	39572.5	7543
mmu-mir-329	Mouse	miRNA	46911.5	41060.6	5850.92
mmu-mir-878	Mouse	miRNA	46658	40767	5891
mmu-mir-302d	Mouse	miRNA	46285.7	44197.8	2087.83
mmu-mir-188	Mouse	miRNA	45901.7	27253.2	18648.5
mmu-mir-1843	Mouse	miRNA	44519.8	36312.2	8207.5
mmu-mir-3074-1	Mouse	miRNA	44462.8	38346.5	6116.33
mmu-mir-1298	Mouse	miRNA	43346.5	33912	9434.5
mmu-mir-466d	Mouse	miRNA	43223.8	17298.6	25925.2
mmu-mir-3074-2	Mouse	miRNA	42554.3	37592	4962.33
mmu-mir-883a	Mouse	miRNA	42208.5	37787.2	4421.33
mmu-mir-1965	Mouse	miRNA	41262.9	26723.8	14539.2
mmu-mir-496	Mouse	miRNA	40921.2	36855.2	4066
mmu-mir-326	Mouse	miRNA	40293.9	28082.8	12211.2
mmu-mir-770	Mouse	miRNA	38939	20845	18094
mmu-mir-1843b	Mouse	miRNA	38934.4	31349.5	7585
mmu-mir-365-2	Mouse	miRNA	35416.8	30493	4923.83
mmu-mir-5100	Mouse	miRNA	35083.8	1045.6	34038.2
mmu-mir-3096b	Mouse	miRNA	35024.2	34012.4	1011.83
mmu-mir-471	Mouse	miRNA	34274.5	31740.5	2534
mmu-mir-3096	Mouse	miRNA	32532.2	31735.4	796.83
mmu-mir-449c	Mouse	miRNA	31964.8	25068.8	6896
mmu-mir-615	Mouse	miRNA	31746.3	18288.3	13458
mmu-mir-5115	Mouse	miRNA	30786.5	4455.5	26331
mmu-mir-877	Mouse	mirtron	30781.5	16666.5	14115
mmu-mir-5114	Mouse	miRNA	30490	23778	6712
mmu-mir-147	Mouse	miRNA	30478.5	20607.5	9871
mmu-mir-666	Mouse	miRNA	30357.9	20758.5	9599.4
mmu-mir-551b	Mouse	miRNA	29639	27156.5	2482.5
mmu-mir-582	Mouse	miRNA	29536.3	28189.8	1346.5
mmu-mir-667	Mouse	miRNA	29355	15824	13531
mmu-mir-669o	Mouse	miRNA	29117.6	27184.7	1932.93
mmu-mir-450b	Mouse	miRNA	28584.9	26735.4	1849.53
mmu-mir-669l	Mouse	miRNA	28134.2	26529.3	1604.85
mmu-mir-488	Mouse	miRNA	27494.6	10669.8	16824.8
mmu-mir-365-1	Mouse	miRNA	27023.5	24261.7	2761.83
mmu-mir-219-1	Mouse	miRNA	26716.5	23166	3550.5
mmu-mir-5099	Mouse	miRNA	26588.7	5854.33	20734.3
mmu-mir-465b-1	Mouse	miRNA	25968.5	21035.1	4933.42
mmu-mir-465b-2	Mouse	miRNA	25968.5	21035.1	4933.42
mmu-mir-18b	Mouse	miRNA	25469.5	22203.5	3266
mmu-mir-1198	Mouse	miRNA	25450.9	15579.8	9871.1
mmu-mir-466c-2	Mouse	miRNA	25175.8	22471.1	2704.7
mmu-mir-466c-1	Mouse	miRNA	25175.3	22470.7	2704.64
mmu-mir-700	Mouse	miRNA	23582.2	14980.7	8601.5
mmu-mir-1224	Mouse	mirtron	23325.8	12164.8	11161
mmu-mir-201	Mouse	miRNA	23014.5	21313.5	1701
mmu-mir-463	Mouse	miRNA	22366.5	20641.5	1725
mmu-mir-1941	Mouse	miRNA	21694.2	17527.3	4166.83
mmu-mir-544	Mouse	miRNA	21551.8	17724.5	3827.25
mmu-mir-1306	Mouse	miRNA	21073.7	13576.7	7497
mmu-mir-467a-1	Mouse	miRNA	20819.4	19419.2	1400.24
mmu-mir-467a-10	Mouse	miRNA	20819.4	19419.2	1400.24
mmu-mir-467a-2	Mouse	miRNA	20819.4	19419.2	1400.24
mmu-mir-467a-3	Mouse	miRNA	20819.4	19419.2	1400.24
mmu-mir-467a-4	Mouse	miRNA	20819.4	19419.2	1400.24
mmu-mir-467a-5	Mouse	miRNA	20819.4	19419.2	1400.24
mmu-mir-467a-6	Mouse	miRNA	20819.4	19419.2	1400.24
mmu-mir-467a-7	Mouse	miRNA	20819.4	19419.2	1400.24
mmu-mir-467a-8	Mouse	miRNA	20819.4	19419.2	1400.24
mmu-mir-467a-9	Mouse	miRNA	20819.4	19419.2	1400.24
mmu-mir-802	Mouse	miRNA	20418.5	17805.5	2613
mmu-mir-466n	Mouse	miRNA	19465.9	18210.7	1255.17
mmu-mir-668	Mouse	3p tailed mirtron	19415	15333	4082
mmu-mir-873	Mouse	miRNA	18989	16561.8	2427.22
mmu-mir-547	Mouse	miRNA	18300	5361	12939
mmu-mir-539	Mouse	miRNA	18057.6	15738.2	2319.4
mmu-mir-467b	Mouse	miRNA	17216.3	16445.7	770.6
mmu-mir-466b-8	Mouse	miRNA	17094.8	14879.3	2215.53
mmu-mir-466e	Mouse	miRNA	17094.8	14879.3	2215.53
mmu-mir-344e	Mouse	miRNA	16676.9	12350.5	4326.33
mmu-mir-466b-4	Mouse	miRNA	16581	14389.5	2191.48
mmu-mir-466b-5	Mouse	miRNA	16581	14389.5	2191.48
mmu-mir-466b-6	Mouse	miRNA	16581	14389.5	2191.48
mmu-mir-466b-7	Mouse	miRNA	16581	14389.5	2191.48
mmu-mir-466b-1	Mouse	miRNA	16580.5	14389.1	2191.42
mmu-mir-466b-2	Mouse	miRNA	16451.8	14258.9	2192.85
mmu-mir-742	Mouse	miRNA	16433.3	11747.5	4685.83
mmu-mir-466a	Mouse	miRNA	16313.7	14129.4	2184.27
mmu-mir-466p	Mouse	miRNA	15865.7	13714.2	2151.47
mmu-mir-505	Mouse	miRNA	15425.1	11067.1	4358
mmu-mir-669a-2	Mouse	miRNA	15333.6	14329.8	1003.79
mmu-mir-669a-1	Mouse	miRNA	15333.5	14329.6	1003.94
mmu-mir-669a-10	Mouse	miRNA	15325.8	14322	1003.79
mmu-mir-669a-11	Mouse	miRNA	15325.8	14322	1003.79
mmu-mir-669a-12	Mouse	miRNA	15325.8	14322	1003.79
mmu-mir-669a-4	Mouse	miRNA	15325.8	14322	1003.79
mmu-mir-669a-5	Mouse	miRNA	15325.8	14322	1003.79
mmu-mir-669a-6	Mouse	miRNA	15325.8	14322	1003.79
mmu-mir-669a-7	Mouse	miRNA	15325.8	14322	1003.79
mmu-mir-669a-8	Mouse	miRNA	15325.8	14322	1003.79
mmu-mir-669a-9	Mouse	miRNA	15325.8	14322	1003.79
mmu-mir-511	Mouse	miRNA	15186.8	11351.8	3835
mmu-mir-669m-2	Mouse	miRNA	15001	13112.2	1888.84
mmu-mir-669m-1	Mouse	miRNA	14989.7	13106.5	1883.24
mmu-mir-5102	Mouse	miRNA	14663.9	13867.6	796.29
mmu-mir-669b	Mouse	miRNA	14471	12623.4	1847.63
mmu-mir-879	Mouse	miRNA	14403.7	12503.6	1900.08
mmu-mir-3095	Mouse	miRNA	14062.5	12268.5	1794
mmu-mir-493	Mouse	miRNA	13941.5	11607.8	2333.67
mmu-mir-489	Mouse	miRNA	13905	12665	1240
mmu-mir-1249	Mouse	miRNA	13849	11621	2228
mmu-mir-412	Mouse	miRNA	13366.7	12043.7	1323
mmu-mir-1964	Mouse	miRNA	13284	8000	5284
mmu-mir-874	Mouse	miRNA	13271	10381	2890
mmu-mir-574	Mouse	miRNA	13230	10019.4	3210.6
mmu-mir-3102	Mouse	mirtron	12867.2	6918.18	5949
mmu-mir-3099	Mouse	miRNA	12736.8	7146.33	5590.5
mmu-mir-669f	Mouse	miRNA	12666.5	11212.4	1454.08
mmu-mir-302c	Mouse	miRNA	12633	5038	7595
mmu-mir-675	Mouse	miRNA	12607	7942	4665
mmu-mir-208a	Mouse	miRNA	12481.5	11103.5	1378
mmu-mir-1193	Mouse	miRNA	12029	9841	2188
mmu-mir-5121	Mouse	miRNA	11809.8	11386.8	423
mmu-mir-3072	Mouse	miRNA	11512.7	10444.1	1068.58
mmu-mir-466b-3	Mouse	miRNA	11059.6	9706.55	1353.07
mmu-mir-669a-3	Mouse	miRNA	10527.7	9789.99	737.74
mmu-mir-883b	Mouse	miRNA	9660.5	8949.5	711
mmu-mir-378b	Mouse	miRNA	8998.97	2589.29	6409.68
mmu-mir-1247	Mouse	miRNA	8941	4363	4578
Cpa3 (7)	Mouse	5p tailed mirtron	8862.5	6259.5	2603
mmu-mir-344b	Mouse	miRNA	8829.54	8169.21	660.33
mmu-mir-3086	Mouse	miRNA	8693	6802	1891
mmu-mir-669d	Mouse	miRNA	8518.57	7983.85	534.72
mmu-mir-669d-2	Mouse	miRNA	8510.58	7979.36	531.22
mmu-mir-669p-1	Mouse	miRNA	8466.57	7753.21	713.36
mmu-mir-669p-2	Mouse	miRNA	8466.57	7753.21	713.36
mmu-mir-760	Mouse	miRNA	8367.84	3192.67	5175.17
mmu-mir-1968	Mouse	miRNA	8213	6243	1970
mmu-mir-677	Mouse	miRNA	8209	7876	333
mmu-mir-448	Mouse	miRNA	8114.34	6000.17	2114.17
mmu-mir-3475	Mouse	miRNA	8056	2750.5	5305.5
mmu-mir-367	Mouse	miRNA	7985.33	7168.33	817
mmu-mir-679	Mouse	miRNA	7712	5666	2046
mmu-mir-758	Mouse	miRNA	7522.5	7098.5	424
mmu-mir-452	Mouse	miRNA	7474	6454	1020
mmu-mir-5097	Mouse	miRNA	7372.86	3930.15	3442.71
mmu-mir-1929	Mouse	miRNA	6403	5012.5	1390.5
mmu-mir-1948	Mouse	miRNA	6299.23	4995.03	1304.2
mmu-mir-3090	Mouse	miRNA	6192.5	5411	781.5
mmu-mir-592	Mouse	miRNA	6016	5708	308
mmu-mir-1934	Mouse	miRNA	5985.21	3475.34	2509.87
mmu-mir-5107	Mouse	5p tailed mirtron	5872.5	2404.5	3468
mmu-mir-491	Mouse	miRNA	5698	4279	1419
mmu-mir-5113	Mouse	miRNA	5633.7	4337.63	1296.07
mmu-mir-344c	Mouse	miRNA	5585.83	5091.83	494
mmu-mir-490	Mouse	miRNA	5440.89	3898.06	1542.83
mmu-mir-3059	Mouse	miRNA	5195	4022.67	1172.33
mmu-mir-1949	Mouse	miRNA	5126.5	4922.5	204
mmu-mir-208b	Mouse	miRNA	5084	4083	1001
mmu-mir-3106	Mouse	miRNA	5075	3815	1260
mmu-mir-325	Mouse	miRNA	5017.06	4658.37	358.69
mmu-mir-669h	Mouse	miRNA	4996.61	4618.75	377.86
mmu-mir-344f	Mouse	miRNA	4992.25	3246	1746.25
mmu-mir-1947	Mouse	miRNA	4971	2954	2017
mmu-mir-1188	Mouse	miRNA	4942	2130	2812
mmu-mir-3963	Mouse	miRNA	4878.34	21.17	4857.17
Baiap3 (22)	Mouse	mirtron	4782.5	1109.5	3673
mmu-mir-466h	Mouse	miRNA	4552.57	4208.82	343.75
mmu-mir-297c	Mouse	miRNA	4531.86	4229.33	302.53
mmu-mir-297b	Mouse	miRNA	4526.25	4174.04	352.21
Clps (1)	Mouse	5p tailed mirtron	4485.33	1551.33	2934
mmu-mir-3079	Mouse	miRNA	4435.53	3710.53	725
mmu-mir-374c	Mouse	miRNA	4414.18	4270.38	143.8
mmu-mir-297a-4	Mouse	miRNA	4105.89	3757.26	348.63
mmu-mir-297a-3	Mouse	miRNA	4103.68	3756.05	347.63
mmu-mir-344d-3	Mouse	miRNA	4015.13	3430.73	584.4
mmu-mir-1251	Mouse	miRNA	3954	3560	394
mmu-mir-346	Mouse	miRNA	3851	2916	935
mmu-mir-190b	Mouse	miRNA	3803.4	3167.4	636
mmu-mir-702	Mouse	mirtron	3660	1230	2430
mmu-mir-5126	Mouse	miRNA	3547.39	1911.74	1635.65
mmu-mir-344d-1	Mouse	miRNA	3395.8	2868.4	527.4
mmu-mir-669e	Mouse	miRNA	3360.72	3109.12	251.6
mmu-mir-344d-2	Mouse	miRNA	3359.13	2838.73	520.4
Troap (7)	Mouse	5p tailed mirtron	3344.5	2189.5	1155
Cpne7 (11)	Mouse	mirtron	3327.67	2310.67	1017
mmu-mir-1943	Mouse	miRNA	3207	2742.5	464.5
mmu-mir-297a-5	Mouse	miRNA	2952.22	2731.2	221.02
mmu-mir-297a-2	Mouse	miRNA	2920.07	2084.5	835.57
mmu-mir-297a-6	Mouse	miRNA	2878.52	2063.95	814.57
mmu-mir-670	Mouse	miRNA	2769	2483	286
mmu-mir-546	Mouse	miRNA	2749	2560	189
mmu-mir-3057	Mouse	miRNA	2680	1829	851
mmu-mir-1264	Mouse	miRNA	2666.1	2384.1	282
mmu-mir-466f-3	Mouse	miRNA	2580.79	1984.59	596.2
mmu-mir-504	Mouse	miRNA	2547.34	2088.67	458.67
mmu-mir-466o	Mouse	miRNA	2491.11	2351.22	139.89
mmu-mir-5128	Mouse	miRNA	2309.08	1468.73	840.35
mmu-mir-3066	Mouse	miRNA	2303	2158	145
mmu-mir-211	Mouse	miRNA	2300.14	1831.64	468.5
mmu-mir-653	Mouse	miRNA	2284	2209	75
mmu-mir-3084	Mouse	miRNA	2228.23	2134.4	93.83
mmu-mir-3474	Mouse	miRNA	2164	1408	756
mmu-mir-1960	Mouse	miRNA	2158.67	976.67	1182
mmu-mir-3081	Mouse	miRNA	2143	1590	553
mmu-mir-3060	Mouse	miRNA	2125.9	327.57	1798.33
mmu-mir-466f-2	Mouse	miRNA	2089.84	1532.28	557.56
mmu-mir-703	Mouse	miRNA	2075.56	1859.59	215.97
mmu-mir-466f-1	Mouse	miRNA	1999.91	1454.85	545.06
mmu-mir-1197	Mouse	miRNA	1978.5	1895.5	83
mKIAA0050 (4)	Mouse	5p tailed mirtron	1947	1566	381
Dbn1 (8)	Mouse	mirtron	1909	488	1421
mmu-mir-720	Mouse	miRNA	1879.66	1847.08	32.58
mmu-mir-701	Mouse	miRNA	1860	1502	358
mmu-mir-466g	Mouse	miRNA	1817.45	485.76	1331.69
mmu-mir-3061	Mouse	miRNA	1814	1463	351
Mbc2 (25)	Mouse	5p tailed mirtron	1774	1259	515
mmu-mir-466f-4	Mouse	miRNA	1741.67	1225.25	516.42
mmu-mir-1b	Mouse	miRNA	1690.5	1554	136.5
mmu-mir-1955	Mouse	miRNA	1667.17	1309.17	358
mmu-mir-1940	Mouse	miRNA	1633.83	1482.33	151.5
mmu-mir-764	Mouse	miRNA	1615.5	1372.5	243
mmu-mir-3085	Mouse	miRNA	1582	465	1117
mmu-mir-3109	Mouse	miRNA	1580	1354	226
mmu-mir-1912	Mouse	miRNA	1572	1257.5	314.5
mmu-mir-3064	Mouse	5p tailed mirtron	1514.5	1101.5	413
mmu-mir-3473d	Mouse	miRNA	1499.47	570.61	928.86
mmu-mir-3970	Mouse	miRNA	1480	181	1299
mmu-mir-28c	Mouse	miRNA	1467.66	239.58	1228.08
Dock6 (18)	Mouse	5p tailed mirtron	1451	1339	112
mmu-mir-3108	Mouse	miRNA	1382	1112	270
mmu-mir-1958	Mouse	miRNA	1339.66	1217.83	121.83
Cln3 (5)	Mouse	5p tailed mirtron	1332	1126	206
mmu-mir-1953	Mouse	miRNA	1278.5	911.5	367
mmu-mir-297a-1	Mouse	miRNA	1256.55	1183.24	73.31
mmu-mir-3071	Mouse	miRNA	1222.5	1023	199.5
mmu-mir-693	Mouse	miRNA	1167.5	964.5	203
mmu-mir-1195	Mouse	miRNA	1167.42	847.75	319.67
Prdm2 (6)	Mouse	5p tailed mirtron	1155	891	264
mmu-mir-1933	Mouse	miRNA	1115.5	1025	90.5
mmu-mir-3473b	Mouse	miRNA	1107.67	1103.82	3.85
mmu-mir-1930	Mouse	miRNA	1106	979	127
mmu-mir-3105	Mouse	miRNA	1095.77	907.52	188.25
mmu-mir-3069	Mouse	miRNA	1028.5	860.5	168
Fbxw9 (1)	Mouse	mirtron	1023	183	840
mmu-mir-3964	Mouse	miRNA	968	103	865
mmu-mir-3076	Mouse	5p tailed mirtron	966	511	455
Elof1 (0)	Mouse	5p tailed mirtron	954	708	246
mmu-mir-3962	Mouse	miRNA	952	173.5	778.5
mmu-mir-1191	Mouse	miRNA	950.29	574.18	376.11
mmu-mir-3110	Mouse	miRNA	932	775	157
mmu-mir-1969	Mouse	miRNA	918	761	157
mmu-mir-3073	Mouse	miRNA	905	820.5	84.5
mmu-mir-5132	Mouse	5p tailed mirtron	901	374	527
mmu-mir-5123	Mouse	miRNA	900.65	761.65	139
Kifc1 (1)	Mouse	5p tailed mirtron	889.58	206.58	683
Rce1 (3)	Mouse	5p tailed mirtron	868	557	311
mmu-mir-466q	Mouse	miRNA	867.72	836.51	31.21
Spna2 (15)	Mouse	5p tailed mirtron	865	685	180
mmu-mir-1199	Mouse	miRNA	851.5	660.5	191
Dnase1l1 (5)	Mouse	mirtron	851	483	368
mmu-mir-3070a	Mouse	miRNA	838.5	671	167.5
mmu-mir-5122	Mouse	miRNA	836.26	783.93	52.33
mmu-mir-1931	Mouse	miRNA	799.91	490.66	309.25
Grk6 (9)	Mouse	5p tailed mirtron	786.5	327.5	459
Syvn1 (12)	Mouse	5p tailed mirtron	767	51	716
Gnb2 (5)	Mouse	5p tailed mirtron	748	114	634
mmu-mir-3083	Mouse	miRNA	731.5	679.5	52
mmu-mir-3087	Mouse	5p tailed mirtron	727.83	476.83	251
mmu-mir-5104	Mouse	miRNA	716.82	257.82	459
mmu-mir-1927	Mouse	miRNA	705.12	350.12	355
mmu-mir-3075	Mouse	miRNA	705	566.75	138.25
mmu-mir-3572	Mouse	5p tailed mirtron	697.33	383.33	314
Pgs1 (3)	Mouse	5p tailed mirtron	688	572	116
mmu-mir-3058	Mouse	miRNA	663	519	144
mmu-mir-3062	Mouse	miRNA	661.25	573.25	88
Whsc2 (9)	Mouse	5p tailed mirtron	659.5	246.5	413
mmu-mir-3965	Mouse	miRNA	648.5	5.5	643
mmu-mir-3091	Mouse	miRNA	647	399	248
mmu-mir-1982	Mouse	5p tailed mirtron	642	414	228
mmu-mir-1956	Mouse	miRNA	630	236	394
mmu-mir-3470b	Mouse	miRNA	627.75	598.15	29.6
Ndufa10 (3)	Mouse	5p tailed mirtron	600	218	382
Cnot1 (12)	Mouse	5p tailed mirtron	598	558	40
Notch1 (0)	Mouse	5p tailed mirtron	592	354	238
Lat (6)	Mouse	5p tailed mirtron	578	426	152
Hspg2 (42)	Mouse	mirtron	572	476	96
abParts (195)	Mouse	5p tailed mirtron	567.5	396.5	171
mmu-mir-466m	Mouse	miRNA	559.53	497.95	61.58
mmu-mir-5129	Mouse	5p tailed mirtron	559	427	132
mmu-mir-3097	Mouse	5p tailed mirtron	546.5	303.5	243
Scrib (10)	Mouse	5p tailed mirtron	535	329	206
C3 (21)	Mouse	5p tailed mirtron	520.67	250.67	270
Smap1l (6)	Mouse	5p tailed mirtron	516	116	400
mmu-mir-1945	Mouse	miRNA	508	353	155
Sec24c (13)	Mouse	5p tailed mirtron	496.56	216.56	280
mmu-mir-3082	Mouse	5p tailed mirtron	478.58	198.58	280
Triobp (20)	Mouse	5p tailed mirtron	478	56	422
Stx5 (2)	Mouse	5p tailed mirtron	477	455	22
mmu-mir-101c	Mouse	miRNA	476.1	304.6	171.5
mmu-mir-5116	Mouse	miRNA	467	391	76
Skiv2l (13)	Mouse	mirtron	454.83	319.83	135
Il10ra (0)	Mouse	5p tailed mirtron	451	231	220
Terf2 (0)	Mouse	5p tailed mirtron	448	67	381
mmu-mir-466l	Mouse	miRNA	434.51	405.23	29.28
Tatdn2 (3)	Mouse	5p tailed mirtron	433.5	150.5	283
Dazap1 (4)	Mouse	5p tailed mirtron	429	188	241
mmu-mir-3088	Mouse	miRNA	429	360	69
Bat1a (1)	Mouse	5p tailed mirtron	428.22	320.22	108
Gga1 (11)	Mouse	5p tailed mirtron	405.83	265.83	140
mmu-mir-704	Mouse	5p tailed mirtron	405	171	234
mmu-mir-1935	Mouse	miRNA	401.58	364.46	37.12
Scamp4 (1)	Mouse	5p tailed mirtron	398	197	201
Actg1 (2)	Mouse	5p tailed mirtron	388	123	265
mmu-mir-1938	Mouse	miRNA	388	232	156
mmu-mir-3078	Mouse	miRNA	381.5	289.5	92
mmu-mir-3093	Mouse	miRNA	373	181	192
Ap2a2 (11)	Mouse	5p tailed mirtron	372	139	233
mmu-mir-3470a	Mouse	miRNA	367.21	357.55	9.66
mmu-mir-3077	Mouse	5p tailed mirtron	360	94	266
mmu-mir-875	Mouse	miRNA	360	327	33
mmu-mir-466k	Mouse	miRNA	358.77	318.42	40.35
Pdlim7 (4)	Mouse	5p tailed mirtron	357	224	133
Map4k2 (19)	Mouse	5p tailed mirtron	352	123	229
Pom121 (7)	Mouse	5p tailed mirtron	348.33	154.33	194
mmu-mir-5133	Mouse	miRNA	334	293	41
mmu-mir-3101	Mouse	miRNA	333.5	282.5	51
Bpag1 (6)	Mouse	5p tailed mirtron	333	263	70
1700027J05Rik (12)	Mouse	mirtron	333	164	169
mmu-mir-1950	Mouse	miRNA	327.89	306.67	21.22
Cherp (3)	Mouse	mirtron	326	132	194
Lta (1)	Mouse	mirtron	325	178	147
mmu-mir-3473c	Mouse	miRNA	321.25	170.25	151
AV312086 (6)	Mouse	5p tailed mirtron	317	251	66
Rpl13 (4)	Mouse	5p tailed mirtron	315.33	109.33	206
mmu-mir-344g	Mouse	miRNA	313.5	193.5	120
Eif3b (4)	Mouse	5p tailed mirtron	313	132	181
Scaf1 (3)	Mouse	5p tailed mirtron	312	157	155
Phf1 (5)	Mouse	5p tailed mirtron	307	58	249
Atp1a3 (14)	Mouse	5p tailed mirtron	305	225	80
Grap2 (4)	Mouse	5p tailed mirtron	291.5	157.5	134
Rassf4 (3)	Mouse	5p tailed mirtron	282	106	176
Acvr1b (0)	Mouse	5p tailed mirtron	276	198	78
Esrra (1)	Mouse	5p tailed mirtron	274	110	164
mmu-mir-3103	Mouse	5p tailed mirtron	272	209	63
mmu-mir-5134	Mouse	5p tailed mirtron	272	138	134
mmu-mir-28b	Mouse	miRNA	270	4	266
mmu-mir-3070b	Mouse	miRNA	267.5	205	62.5
mmu-mir-3063	Mouse	miRNA	267	241	26
Pra1 (2)	Mouse	5p tailed mirtron	265	119	146
mmu-mir-5103	Mouse	miRNA	263.16	117.08	146.08
Dennd4b (6)	Mouse	5p tailed mirtron	260	200	60
Nav1 (17)	Mouse	5p tailed mirtron	258.08	187.08	71
mmu-mir-5130	Mouse	miRNA	258	236	22
Ncan (8)	Mouse	5p tailed mirtron	257.33	185.33	72
Pak4 (6)	Mouse	5p tailed mirtron	257	161	96
Josd2 (1)	Mouse	5p tailed mirtron	253	64	189
Srf (0)	Mouse	5p tailed mirtron	249	145	104
mmu-mir-3092	Mouse	miRNA	249	172	77
mmu-mir-3094	Mouse	5p tailed mirtron	248	210	38
Ptpn5 (7)	Mouse	5p tailed mirtron	244.83	72.83	172
Rasgef1a (3)	Mouse	5p tailed mirtron	244	37	207
Cul4a (11)	Mouse	5p tailed mirtron	242.33	17.33	225
Armcx3 (1)	Mouse	5p tailed mirtron	241	115	126
Helz (19)	Mouse	5p tailed mirtron	239	160	79
Unc13a (42)	Mouse	5p tailed mirtron	229.33	36.33	193
Myh3 (34)	Mouse	mirtron	228.08	111.08	117
mmu-mir-1966	Mouse	5p tailed mirtron	228	152	76
Pik3cd (11)	Mouse	5p tailed mirtron	225.5	74.5	151
mmu-mir-3098	Mouse	miRNA	219.85	192.82	27.03
Ltb (0)	Mouse	5p tailed mirtron	218	162	56
Sidt2 (23)	Mouse	5p tailed mirtron	216.9	118.9	98
mmu-mir-3089	Mouse	miRNA	215.5	194.5	21
BC141885 (0)	Mouse	5p tailed mirtron	213	106	107
Ptprs (19)	Mouse	3p tailed mirtron	208	152	56
Acin1 (11)	Mouse	5p tailed mirtron	208	173	35
Zkscan3 (0)	Mouse	5p tailed mirtron	204	150	54
AK220210 (22)	Mouse	5p tailed mirtron	202	86	116
Ankrd52 (9)	Mouse	5p tailed mirtron	199	7	192
Klf7 (1)	Mouse	5p tailed mirtron	198	111	87
Ugcgl1 (12)	Mouse	5p tailed mirtron	195	166	29
mmu-mir-449b	Mouse	miRNA	195	91	104
mmu-mir-692-2	Mouse	miRNA	194.03	178.72	15.31
Sned1 (13)	Mouse	5p tailed mirtron	194	37	157
D0HXS9928E (3)	Mouse	5p tailed mirtron	186	151	35
mmu-mir-5136	Mouse	miRNA	185.11	178.11	7
mmu-mir-1951	Mouse	miRNA	184.5	74.5	110
Narfl (6)	Mouse	5p tailed mirtron	182	110	72
Wasf2 (7)	Mouse	5p tailed mirtron	178	97	81
mmu-mir-1936	Mouse	miRNA	177	99	78
Farsla (9)	Mouse	5p tailed mirtron	176	115	61
mmu-mir-669k	Mouse	miRNA	171.54	137.45	34.09
mmu-mir-3112	Mouse	miRNA	171	127	44
Prkci (9)	Mouse	5p tailed mirtron	169.83	59.83	110
Sbf1 (10)	Mouse	5p tailed mirtron	169	72	97
Kif1c (9)	Mouse	5p tailed mirtron	167.2	98.2	69
Ep400 (30)	Mouse	5p tailed mirtron	167	104	63
Ppp1r7 (0)	Mouse	5p tailed mirtron	166.5	93.5	73
Ank (6)	Mouse	5p tailed mirtron	165	78	87
Atp6v0a1 (7)	Mouse	5p tailed mirtron	165	51	114
mmu-mir-1954	Mouse	miRNA	163.11	85.39	77.72
Rpl18a (3)	Mouse	5p tailed mirtron	161	32	129
Srebf1 (16)	Mouse	5p tailed mirtron	161	64	97
mmu-mir-5131	Mouse	miRNA	161	155	6
Sirt7 (0)	Mouse	3p tailed mirtron	160	86	74
Skiv2l (18)	Mouse	5p tailed mirtron	157	31	126
mmu-mir-5101	Mouse	miRNA	155.25	62.25	93
4933407C03Rik (19)	Mouse	5p tailed mirtron	155	95	60
Adi1 (1)	Mouse	5p tailed mirtron	155	107	48
Sh2b3 (1)	Mouse	5p tailed mirtron	153	70	83
mmu-mir-654	Mouse	miRNA	152	80	72
Fbs1 (6)	Mouse	mirtron	152	100	52
Mrpl21 (4)	Mouse	5p tailed mirtron	150	106	44
Ppap2c (0)	Mouse	5p tailed mirtron	149.5	64.5	85
testican-2 (6)	Mouse	5p tailed mirtron	147.5	35.5	112
mmu-mir-5125	Mouse	miRNA	144	120	24
Centd3 (28)	Mouse	mirtron	143.11	83.11	60
mmu-mir-690	Mouse	miRNA	142.28	138.55	3.73
mKIAA1833 (23)	Mouse	5p tailed mirtron	140	54	86
Syn1 (10)	Mouse	3p tailed mirtron	139	114	25
Ankrd52 (20)	Mouse	5p tailed mirtron	139	71	68
Gucy1a3 (4)	Mouse	5p tailed mirtron	138	122	16
Akt1 (3)	Mouse	5p tailed mirtron	137	18	119
Ars2 (4)	Mouse	5p tailed mirtron	137	61	76
mmu-mir-1893	Mouse	miRNA	136	133	3
Fubp3 (12)	Mouse	5p tailed mirtron	135	92	43
Dohh (1)	Mouse	5p tailed mirtron	134	75	59
mmu-mir-694	Mouse	miRNA	134	125	9
Pink1 (4)	Mouse	5p tailed mirtron	133.5	85.5	48
Arrb2 (8)	Mouse	5p tailed mirtron	132	110	22
Slc25a39 (5)	Mouse	5p tailed mirtron	132	88	44
Etfb (4)	Mouse	5p tailed mirtron	131	80	51
Mcpt8 (3)	Mouse	5p tailed mirtron	130	113	17
mmu-mir-1932	Mouse	miRNA	130	75	55
AW555464 (4)	Mouse	5p tailed mirtron	127.33	92.33	35
2700081O15Rik (2)	Mouse	5p tailed mirtron	127	41	86
Dedd2 (1)	Mouse	5p tailed mirtron	127	90	37
Rab35 (4)	Mouse	5p tailed mirtron	126.5	36.5	90
Dnaja4 (2)	Mouse	5p tailed mirtron	126	83	43
Tmem39b (5)	Mouse	5p tailed mirtron	126	69	57
Pcnxl3 (8)	Mouse	5p tailed mirtron	125.5	63.5	62
Mllt6 (14)	Mouse	mirtron	125	43	82
Med23 (26)	Mouse	5p tailed mirtron	124	100	24
Nipsnap1 (7)	Mouse	5p tailed mirtron	123	89	34
Tbc1d16 (7)	Mouse	5p tailed mirtron	122	64	58
Srebf1 (11)	Mouse	5p tailed mirtron	121	82	39
mmu-mir-1192	Mouse	miRNA	120.17	116.84	3.33
Mybl2 (4)	Mouse	5p tailed mirtron	120	52	68
mmu-mir-669i	Mouse	miRNA	118.12	105.48	12.64
4632411B12Rik (11)	Mouse	5p tailed mirtron	117	66	51
Smurf1 (5)	Mouse	5p tailed mirtron	116.5	95.5	21
Lrig1 (16)	Mouse	5p tailed mirtron	115.25	52.25	63
Atp2b4 (12)	Mouse	5p tailed mirtron	114	88	26
Aldh4a1 (11)	Mouse	5p tailed mirtron	112	67	45
Dnmt1 (27)	Mouse	5p tailed mirtron	112	61	51
mmu-mir-3100	Mouse	5p tailed mirtron	112	72	40
Aff4 (16)	Mouse	5p tailed mirtron	111.5	97.5	14
Diap1 (20)	Mouse	5p tailed mirtron	111	62	49
Acly (0)	Mouse	5p tailed mirtron	110.67	75.67	35
Gcn1l1 (9)	Mouse	5p tailed mirtron	110.5	54.5	56
Azin1 (11)	Mouse	5p tailed mirtron	110	84	26
Loxl2 (11)	Mouse	5p tailed mirtron	109	75	34
mmu-mir-3968	Mouse	miRNA	109	104.5	4.5
Fads1 (4)	Mouse	5p tailed mirtron	108	56	52
mmu-mir-5098	Mouse	miRNA	106.53	83.91	22.62
Clspn (1)	Mouse	5p tailed mirtron	106	28	78
Parp1 (7)	Mouse	5p tailed mirtron	104	77	27
Plekha1 (9)	Mouse	5p tailed mirtron	104	88	16
Sh3pxd2a (3)	Mouse	5p tailed mirtron	104	55	49
Raver1 (11)	Mouse	mirtron	104	70	34
Lrrk1 (0)	Mouse	5p tailed mirtron	102	40	62
mmu-mir-3471-2	Mouse	miRNA	101.4	88.07	13.33
Ssh3 (11)	Mouse	5p tailed mirtron	101	45	56
Actr8 (7)	Mouse	5p tailed mirtron	100	25	75
Hip1r (12)	Mouse	5p tailed mirtron	100	65	35
Slc37a4 (3)	Mouse	5p tailed mirtron	100	53	47
mmu-mir-1186	Mouse	miRNA	99.54	87.69	11.85
mmu-mir-3113	Mouse	miRNA	98.03	66.53	31.5
5830404H04Rik (7)	Mouse	5p tailed mirtron	97	24	73
Cd82 (5)	Mouse	5p tailed mirtron	97	53	44
Pold1 (14)	Mouse	5p tailed mirtron	97	36	61
Ecm1 (8)	Mouse	5p tailed mirtron	95	58	37
mmu-mir-5119	Mouse	miRNA	95	15.5	79.5
mmu-mir-686	Mouse	miRNA	93.67	83.67	10
Heatr3 (0)	Mouse	5p tailed mirtron	92	43	49
Mst1 (2)	Mouse	mirtron	92	54	38
Pi4kb (7)	Mouse	5p tailed mirtron	91	72	19
Cars (10)	Mouse	5p tailed mirtron	90	82	8
mmu-mir-1190	Mouse	miRNA	90	61	29
Gm632 (10)	Mouse	5p tailed mirtron	89	6	83
Tmem120a (10)	Mouse	5p tailed mirtron	89	65	24
Sema4a (8)	Mouse	5p tailed mirtron	87.83	44.83	43
Rasa4 (16)	Mouse	5p tailed mirtron	87	50	37
mmu-mir-698	Mouse	5p tailed mirtron	86	36	50
Ptbp1 (10)	Mouse	5p tailed mirtron	86	51	35
Cdc25a (10)	Mouse	5p tailed mirtron	85	28	57
mmu-mir-682	Mouse	miRNA	84.33	49.45	34.88
mmu-mir-1967	Mouse	miRNA	84	63	21
mmu-mir-876	Mouse	miRNA	83	82	1
Centd3 (5)	Mouse	5p tailed mirtron	82.67	29.67	53
Plxnb2 (9)	Mouse	5p tailed mirtron	81	62	19
Sgsm2 (4)	Mouse	5p tailed mirtron	81	47	34
Grina (1)	Mouse	5p tailed mirtron	79	40	39
Pdxk (6)	Mouse	5p tailed mirtron	78	24	54
Lama5 (65)	Mouse	5p tailed mirtron	77.67	47.67	30
1700113I22Rik (4)	Mouse	5p tailed mirtron	77	43	34
Loxl3 (8)	Mouse	5p tailed mirtron	76	39	37
Csf1r (7)	Mouse	5p tailed mirtron	75	56	19
mmu-mir-3067	Mouse	miRNA	75	54	21
mmu-mir-3080	Mouse	miRNA	73	61	12
Ccnf (5)	Mouse	5p tailed mirtron	72	22	50
Erbb3 (2)	Mouse	5p tailed mirtron	71.5	44.5	27
Adam8 (13)	Mouse	5p tailed mirtron	71	59	12
Itga5 (21)	Mouse	5p tailed mirtron	69	47	22
mmu-mir-599	Mouse	miRNA	68	65	3
Aqr (9)	Mouse	5p tailed mirtron	67	27	40
Ctnnb1 (6)	Mouse	5p tailed mirtron	67	27	40
mmu-mir-466j	Mouse	miRNA	65.8	62.63	3.17
Anxa5 (0)	Mouse	5p tailed mirtron	65.5	39.5	26
Dcakd (1)	Mouse	5p tailed mirtron	65	51	14
Dgkz (0)	Mouse	5p tailed mirtron	65	47	18
Mapk8ip1 (3)	Mouse	5p tailed mirtron	65	39	26
mmu-mir-3104	Mouse	5p tailed mirtron	65	37	28
mmu-mir-1962	Mouse	miRNA	63.51	54.51	9
Slc17a7 (9)	Mouse	5p tailed mirtron	63	34	29
Slc12a4 (6)	Mouse	5p tailed mirtron	62	32	30
Ube3b (13)	Mouse	5p tailed mirtron	62	25	37
Fbxo6 (2)	Mouse	5p tailed mirtron	61	46	15
Rrp1 (3)	Mouse	5p tailed mirtron	61	39	22
mmu-mir-3473	Mouse	miRNA	60.68	58.63	2.05
mmu-mir-1903	Mouse	miRNA	59.91	58.79	1.12
mmu-mir-1946b	Mouse	miRNA	58.95	55.63	3.32
mmu-mir-466i	Mouse	miRNA	58.95	54.81	4.14
mmu-mir-1971	Mouse	miRNA	58	1	57
mmu-mir-719	Mouse	miRNA	58	53	5
mmu-mir-1892	Mouse	miRNA	57.5	47.5	10
mmu-mir-3471-1	Mouse	miRNA	56.39	46.1	10.29
Cfb (12)	Mouse	5p tailed mirtron	56	22	34
Tchp (9)	Mouse	5p tailed mirtron	56	40	16
mmu-mir-763	Mouse	miRNA	56	45	11
Gfra4 (2)	Mouse	mirtron	56	23	33
mmu-mir-5110	Mouse	miRNA	55.5	18.5	37
mmu-mir-1970	Mouse	miRNA	55.4	41.2	14.2
mmu-mir-1196	Mouse	miRNA	55.02	36.63	18.39
Fxyd5 (1)	Mouse	5p tailed mirtron	55	30	25
Mgat4b (5)	Mouse	5p tailed mirtron	55	35	20
Mlh3 (6)	Mouse	5p tailed mirtron	55	35	20
Ctrb1 (0)	Mouse	5p tailed mirtron	54	20	34
mmu-mir-1902	Mouse	miRNA	54	49	5
Chd4 (0)	Mouse	5p tailed mirtron	53	30	23
mmu-mir-5135	Mouse	miRNA	53	35	18
mmu-mir-669g	Mouse	miRNA	52.44	23.04	29.4
4933407C03Rik (14)	Mouse	5p tailed mirtron	51.5	21.5	30
Camk2a (8)	Mouse	5p tailed mirtron	51	30	21
Jag2 (2)	Mouse	5p tailed mirtron	51	30	21
KIAA1440 (6)	Mouse	5p tailed mirtron	51	37	14
mmu-mir-1187	Mouse	miRNA	50.37	46.53	3.84
Atp9a (22)	Mouse	5p tailed mirtron	50	28	22
mmu-mir-3969	Mouse	miRNA	49	19	30
mmu-mir-5120	Mouse	miRNA	48	25	23
mmu-mir-5108	Mouse	miRNA	47	11	36
mmu-mir-688	Mouse	miRNA	45.25	32.25	13
mmu-mir-2137	Mouse	miRNA	44.5	18.5	26
mmu-mir-669n	Mouse	miRNA	41.01	8.27	32.74
mmu-mir-1907	Mouse	miRNA	40	40	0
mmu-mir-467h	Mouse	miRNA	38.45	28.72	9.73
mmu-mir-207	Mouse	miRNA	37.37	25.37	12
mmu-mir-1894	Mouse	miRNA	32.4	31.4	1
mmu-mir-1957	Mouse	miRNA	32.33	15.05	17.28
mmu-mir-692-1	Mouse	miRNA	25.81	18.43	7.38
mmu-mir-1963	Mouse	5p tailed mirtron	25	13	12
mmu-mir-669j	Mouse	miRNA	24.75	18.39	6.36
mmu-mir-707	Mouse	miRNA	24	23	1
mmu-mir-721	Mouse	miRNA	22	0	22
mmu-mir-684-1	Mouse	miRNA	21.88	7.61	14.27
mmu-mir-684-2	Mouse	miRNA	21.31	7.04	14.27
mmu-mir-5111	Mouse	miRNA	20.35	11.35	9
mmu-mir-2139	Mouse	miRNA	20.33	17.33	3
mmu-mir-678	Mouse	miRNA	20	18	2
mmu-mir-767	Mouse	miRNA	20	5	15
mmu-mir-3472	Mouse	miRNA	17.8	11.66	6.14
mmu-mir-5112	Mouse	miRNA	16.5	4	12.5
mmu-mir-713	Mouse	miRNA	16.28	15.28	1
mmu-mir-1961	Mouse	miRNA	16	1	15
mmu-mir-5127	Mouse	miRNA	16	1	15
mmu-mir-467f	Mouse	miRNA	14.96	10.46	4.5
mmu-mir-1186b	Mouse	miRNA	14.34	12.96	1.38
mmu-mir-5106	Mouse	miRNA	14.34	6.34	8
mmu-mir-3967	Mouse	miRNA	14	0	14
mmu-mir-709	Mouse	miRNA	11.8	10.79	1.01
mmu-mir-718	Mouse	miRNA	10	9	1
mmu-mir-1946a	Mouse	miRNA	9.72	5.32	4.4
mmu-mir-1928	Mouse	miRNA	8.21	1.21	7
mmu-mir-5124	Mouse	miRNA	8.18	4.18	4
mmu-mir-1905	Mouse	miRNA	8	6	2
mmu-mir-467g	Mouse	miRNA	7.44	1.44	6
mmu-mir-1906-1	Mouse	miRNA	7.31	7.19	0.12
mmu-mir-1906-2	Mouse	miRNA	7.31	7.19	0.12
mmu-mir-3966	Mouse	miRNA	7	6	1
mmu-mir-453	Mouse	miRNA	7	5	2
mmu-mir-761	Mouse	miRNA	7	6	1
mmu-mir-683-1	Mouse	miRNA	6.5	3	3.5
mmu-mir-683-2	Mouse	miRNA	6.5	3	3.5
mmu-mir-680-2	Mouse	miRNA	6.05	1.05	5
mmu-mir-1901	Mouse	miRNA	5	5	0
mmu-mir-2861	Mouse	miRNA	5	2	3
mmu-mir-568	Mouse	miRNA	4	4	0
mmu-mir-680-1	Mouse	miRNA	3.28	0.28	3
mmu-mir-1895	Mouse	miRNA	3.23	0.21	3.02
mmu-mir-3960	Mouse	miRNA	3.09	0.09	3
mmu-mir-1952	Mouse	miRNA	3	0	3
mmu-mir-509	Mouse	miRNA	3	3	0
mmu-mir-717	Mouse	miRNA	3	3	0
mmu-mir-705	Mouse	miRNA	2.86	0.86	2
mmu-mir-680-3	Mouse	miRNA	2.34	2.34	0
mmu-mir-5118	Mouse	miRNA	2.02	0.35	1.67
mmu-mir-1904	Mouse	miRNA	2	2	0
mmu-mir-3961	Mouse	miRNA	2	1	1
mmu-mir-706	Mouse	miRNA	1.69	1.68	0.01
mmu-mir-1896	Mouse	miRNA	1	1	0
mmu-mir-1897	Mouse	miRNA	1	1	0
mmu-mir-1898	Mouse	miRNA	1	1	0
mmu-mir-1942	Mouse	miRNA	1	0	1
mmu-mir-327	Mouse	miRNA	1	1	0
mmu-mir-3971	Mouse	miRNA	1	1	0
mmu-mir-5046	Mouse	miRNA	1	1	0
mmu-mir-697	Mouse	miRNA	1	1	0
mmu-mir-759	Mouse	miRNA	1	1	0
mmu-mir-804	Mouse	miRNA	1	1	0
mmu-mir-882	Mouse	miRNA	1	1	0
mmu-mir-105	Mouse	miRNA	0	0	0
mmu-mir-1899	Mouse	miRNA	0	0	0
mmu-mir-1900	Mouse	miRNA	0	0	0
mmu-mir-2136	Mouse	miRNA	0	0	0
mmu-mir-343	Mouse	miRNA	0	0	0
mmu-mir-432	Mouse	miRNA	0	0	0
mmu-mir-681	Mouse	miRNA	0	0	0
mmu-mir-687	Mouse	miRNA	0	0	0
mmu-mir-691	Mouse	miRNA	0	0	0
mmu-mir-695	Mouse	miRNA	0	0	0
mmu-mir-710	Mouse	miRNA	0	0	0
mmu-mir-711	Mouse	miRNA	0	0	0
mmu-mir-762	Mouse	miRNA	0	0	0
