# Supplementary material
Source: HighWire-hosted journal article supplement (https://genome.cshlp.org/content/suppl/2012/08/22/22.9.1634)
Supplement: Supp_TableS8_AGO_hairpin_data.xlsx [file Supp_TableS8_AGO_hairpin_data.xlsx]

## Sheet: Ago libraries summary
Library			Total reads	Clipped pass	Mapped reads	miRNA reads perfect	mirtron reads perfect	miRNA reads untemplated	mirtron reads untemplated
GSM317183	E14.5 cortex Ago1-IP	Schwamborn, Cell 2009	78964	66483	57243	19857	11	18069	45
GSM317184	E14.5 cortex Trim32-IP	Schwamborn, Cell 2009	69318	66104	62835	4275	4	6657	9
SRR207113	HeLa Ago1/2-IP	Valen, NSMB 2011	17899848	15548337	12289588	12065756	5354	2100359	3107
SRR207114	HeLa sirRrp40 Ago1/2-IP	Valen, NSMB 2011	17686372	16435810	13104170	12399432	3686	1882990	2196
Ago2-IP	MCF7 Ago2-IP	Persson, Cancer Research 2011	29483510	16676925	11178615	6821270	2759	359239	561

## Sheet: Mouse
Mouse Locus	Ago Hairpin Reads	Type
uc007ldu.1_intron_20_0_chr11_97048762_r	1	Candidate
uc007wif.1_intron_1_0_chr15_75878103_r	1	Candidate
uc007xwc.1_intron_10_0_chr15_102334738_r	2	Candidate
uc009fyn.1_intron_12_0_chr7_29153745_r	1	Candidate
uc009jqy.1_intron_9_0_chr7_133518718_r.3p	1	Candidate
uc009rty.1_intron_10_0_chr9_110292693_r	1	Candidate
mmu-let-7a-1	47	miRNA
mmu-let-7a-2	48.5	miRNA
mmu-let-7b	39	miRNA
mmu-let-7c-1	72	miRNA
mmu-let-7c-2	63.5	miRNA
mmu-let-7d	106	miRNA
mmu-let-7e	34	miRNA
mmu-let-7f-1	24	miRNA
mmu-let-7f-2	20	miRNA
mmu-let-7g	38	miRNA
mmu-let-7i	14	miRNA
mmu-mir-100	57	miRNA
mmu-mir-101a	15	miRNA
mmu-mir-101b	42	miRNA
mmu-mir-103-1	47.17	miRNA
mmu-mir-103-2	51.17	miRNA
mmu-mir-106a	16.5	miRNA
mmu-mir-106b	634	miRNA
mmu-mir-107	37.67	miRNA
mmu-mir-10a	48	miRNA
mmu-mir-10b	25	miRNA
mmu-mir-1193	4	miRNA
mmu-mir-1198	9	miRNA
mmu-mir-122	2	miRNA
mmu-mir-124-1	19.33	miRNA
mmu-mir-124-2	19.33	miRNA
mmu-mir-124-3	19.33	miRNA
mmu-mir-1247	1	miRNA
mmu-mir-1249	23	miRNA
mmu-mir-1251	16	miRNA
mmu-mir-125a	446	miRNA
mmu-mir-125b-1	223.33	miRNA
mmu-mir-125b-2	206.33	miRNA
mmu-mir-126	274	miRNA
mmu-mir-127	5	miRNA
mmu-mir-128-1	83	miRNA
mmu-mir-128-2	47	miRNA
mmu-mir-129-1	2	miRNA
mmu-mir-129-2	8	miRNA
mmu-mir-1298	1	miRNA
mmu-mir-1306	18	miRNA
mmu-mir-130a	12	miRNA
mmu-mir-130b	31	miRNA
mmu-mir-132	16	miRNA
mmu-mir-133a-1	1.33	miRNA
mmu-mir-133a-2	1.33	miRNA
mmu-mir-133b	1.33	miRNA
mmu-mir-134	30	miRNA
mmu-mir-135a-1	227.5	miRNA
mmu-mir-135a-2	259	miRNA
mmu-mir-135b	91	miRNA
mmu-mir-136	8	miRNA
mmu-mir-137	40	miRNA
mmu-mir-138-2	2	miRNA
mmu-mir-139	38	miRNA
mmu-mir-140	68	miRNA
mmu-mir-141	6.33	miRNA
mmu-mir-142	2	miRNA
mmu-mir-143	2	miRNA
mmu-mir-145	18	miRNA
mmu-mir-148a	49	miRNA
mmu-mir-148b	14	miRNA
mmu-mir-149	13	miRNA
mmu-mir-150	5	miRNA
mmu-mir-151	341	miRNA
mmu-mir-152	11	miRNA
mmu-mir-153	157	miRNA
mmu-mir-154	6	miRNA
mmu-mir-155	3	miRNA
mmu-mir-15a	93	miRNA
mmu-mir-15b	1040.83	miRNA
mmu-mir-16-1	1206.33	miRNA
mmu-mir-16-2	1202.33	miRNA
mmu-mir-17	644.5	miRNA
mmu-mir-181a-1	20.5	miRNA
mmu-mir-181a-2	53.5	miRNA
mmu-mir-181b-1	54	miRNA
mmu-mir-181b-2	56	miRNA
mmu-mir-181c	2	miRNA
mmu-mir-181d	23	miRNA
mmu-mir-182	54	miRNA
mmu-mir-183	164	miRNA
mmu-mir-1839	30	miRNA
mmu-mir-1843	1	miRNA
mmu-mir-185	14	miRNA
mmu-mir-186	23	miRNA
mmu-mir-187	2	miRNA
mmu-mir-18a	127	miRNA
mmu-mir-18b	1	miRNA
mmu-mir-190	12.67	miRNA
mmu-mir-190b	1	miRNA
mmu-mir-191	150.5	miRNA
mmu-mir-192	3	miRNA
mmu-mir-1930	1	miRNA
mmu-mir-194-1	5	miRNA
mmu-mir-194-2	8	miRNA
mmu-mir-195	31	miRNA
mmu-mir-1964	1	miRNA
mmu-mir-1969	1	miRNA
mmu-mir-1983	85	miRNA
mmu-mir-199a-1	1037.83	miRNA
mmu-mir-199a-2	1044.33	miRNA
mmu-mir-199b	1016.83	miRNA
mmu-mir-19a	4	miRNA
mmu-mir-19b-1	24	miRNA
mmu-mir-19b-2	24	miRNA
mmu-mir-1a-1	2	miRNA
mmu-mir-1a-2	2	miRNA
mmu-mir-200a	23	miRNA
mmu-mir-200b	494	miRNA
mmu-mir-200c	288	miRNA
mmu-mir-203	41	miRNA
mmu-mir-204	112	miRNA
mmu-mir-205	60	miRNA
mmu-mir-206	80	miRNA
mmu-mir-20a	1443	miRNA
mmu-mir-20b	12	miRNA
mmu-mir-21	91	miRNA
mmu-mir-210	2	miRNA
mmu-mir-211	3.5	miRNA
mmu-mir-212	8	miRNA
mmu-mir-214	10	miRNA
mmu-mir-216b	2	miRNA
mmu-mir-218-1	229	miRNA
mmu-mir-218-2	248	miRNA
mmu-mir-219-1	3	miRNA
mmu-mir-219-2	15	miRNA
mmu-mir-22	27	miRNA
mmu-mir-221	8	miRNA
mmu-mir-222	8	miRNA
mmu-mir-223	5	miRNA
mmu-mir-224	21	miRNA
mmu-mir-23a	535	miRNA
mmu-mir-23b	620	miRNA
mmu-mir-24-1	67.5	miRNA
mmu-mir-24-2	67.5	miRNA
mmu-mir-25	1261	miRNA
mmu-mir-26a-1	497	miRNA
mmu-mir-26a-2	501	miRNA
mmu-mir-26b	748	miRNA
mmu-mir-27a	121.67	miRNA
mmu-mir-27b	867.67	miRNA
mmu-mir-28	29	miRNA
mmu-mir-28c	1	miRNA
mmu-mir-296	8.5	miRNA
mmu-mir-298	2	miRNA
mmu-mir-299	35	miRNA
mmu-mir-29a	1	miRNA
mmu-mir-29c	3	miRNA
mmu-mir-300	5	miRNA
mmu-mir-301a	27	miRNA
mmu-mir-301b	2	miRNA
mmu-mir-302a	1	miRNA
mmu-mir-302b	2	miRNA
mmu-mir-302d	5	miRNA
mmu-mir-3057	2	miRNA
mmu-mir-3060	3	miRNA
mmu-mir-3068	2	miRNA
mmu-mir-3078	3	miRNA
mmu-mir-3084	1.5	miRNA
mmu-mir-3095	1	miRNA
mmu-mir-3099	16	miRNA
mmu-mir-30a	171	miRNA
mmu-mir-30b	75.33	miRNA
mmu-mir-30c-1	186.33	miRNA
mmu-mir-30c-2	187.33	miRNA
mmu-mir-30d	96	miRNA
mmu-mir-30e	212	miRNA
mmu-mir-31	1	miRNA
mmu-mir-3107	15.5	miRNA
mmu-mir-32	2	miRNA
mmu-mir-322	306	miRNA
mmu-mir-323	89	miRNA
mmu-mir-324	24	miRNA
mmu-mir-325	59	miRNA
mmu-mir-326	2	miRNA
mmu-mir-328	30	miRNA
mmu-mir-329	95	miRNA
mmu-mir-33	3	miRNA
mmu-mir-330	9	miRNA
mmu-mir-331	3	miRNA
mmu-mir-335	674	miRNA
mmu-mir-337	4	miRNA
mmu-mir-338	1	miRNA
mmu-mir-339	3.5	miRNA
mmu-mir-340	99	miRNA
mmu-mir-342	333	miRNA
mmu-mir-344-1	1.5	miRNA
mmu-mir-344-2	1.5	miRNA
mmu-mir-344c	2	miRNA
mmu-mir-345	4	miRNA
mmu-mir-346	1	miRNA
mmu-mir-3473d	1	miRNA
mmu-mir-3475	1	miRNA
mmu-mir-34a	3	miRNA
mmu-mir-34b	6	miRNA
mmu-mir-34c	6	miRNA
mmu-mir-350	91	miRNA
mmu-mir-351	95	miRNA
mmu-mir-361	157	miRNA
mmu-mir-362	63	miRNA
mmu-mir-363	2	miRNA
mmu-mir-365-1	6.5	miRNA
mmu-mir-365-2	5.5	miRNA
mmu-mir-369	172.5	miRNA
mmu-mir-370	9	miRNA
mmu-mir-374	224	miRNA
mmu-mir-374c	1	miRNA
mmu-mir-375	12	miRNA
mmu-mir-376b	50	miRNA
mmu-mir-376c	17	miRNA
mmu-mir-377	9	miRNA
mmu-mir-378	3.75	miRNA
mmu-mir-379	81	miRNA
mmu-mir-380	11	miRNA
mmu-mir-381	1	miRNA
mmu-mir-382	83	miRNA
mmu-mir-383	3	miRNA
mmu-mir-384	80	miRNA
mmu-mir-409	14	miRNA
mmu-mir-410	137	miRNA
mmu-mir-411	87	miRNA
mmu-mir-412	12	miRNA
mmu-mir-421	37	miRNA
mmu-mir-423	25	miRNA
mmu-mir-425	43	miRNA
mmu-mir-429	146	miRNA
mmu-mir-431	5	miRNA
mmu-mir-433	113	miRNA
mmu-mir-434	135	miRNA
mmu-mir-449a	4	miRNA
mmu-mir-450a-1	23.5	miRNA
mmu-mir-450a-2	23.5	miRNA
mmu-mir-450b	1	miRNA
mmu-mir-451	19	miRNA
mmu-mir-452	1	miRNA
mmu-mir-455	16	miRNA
mmu-mir-466a	1.28	miRNA
mmu-mir-466b-1	1.38	miRNA
mmu-mir-466b-2	1.38	miRNA
mmu-mir-466b-4	1.38	miRNA
mmu-mir-466b-5	1.38	miRNA
mmu-mir-466b-6	1.38	miRNA
mmu-mir-466b-7	1.38	miRNA
mmu-mir-466b-8	1.36	miRNA
mmu-mir-466c-1	2.28	miRNA
mmu-mir-466c-2	2.28	miRNA
mmu-mir-466d	4.07	miRNA
mmu-mir-466e	1.36	miRNA
mmu-mir-466n	2	miRNA
mmu-mir-466p	1.3	miRNA
mmu-mir-467c	4	miRNA
mmu-mir-467d	1.15	miRNA
mmu-mir-467e	6	miRNA
mmu-mir-483	73.33	miRNA
mmu-mir-485	54	miRNA
mmu-mir-486	15.5	miRNA
mmu-mir-487b	74	miRNA
mmu-mir-488	16.67	miRNA
mmu-mir-491	1	miRNA
mmu-mir-493	1	miRNA
mmu-mir-494	24	miRNA
mmu-mir-495	189	miRNA
mmu-mir-496	31	miRNA
mmu-mir-499	5	miRNA
mmu-mir-500	1	miRNA
mmu-mir-501	45	miRNA
mmu-mir-503	16	miRNA
mmu-mir-505	1	miRNA
mmu-mir-511	1	miRNA
mmu-mir-5126	2	miRNA
mmu-mir-532	47.5	miRNA
mmu-mir-540	1	miRNA
mmu-mir-541	46	miRNA
mmu-mir-542	1	miRNA
mmu-mir-543	56	miRNA
mmu-mir-551b	2	miRNA
mmu-mir-574	7.3	miRNA
mmu-mir-582	3	miRNA
mmu-mir-598	50	miRNA
mmu-mir-615	13	miRNA
mmu-mir-652	220	miRNA
mmu-mir-664	8	miRNA
mmu-mir-665	3	miRNA
mmu-mir-666	1	miRNA
mmu-mir-667	86	miRNA
mmu-mir-669a-1	5.26	miRNA
mmu-mir-669a-10	5.26	miRNA
mmu-mir-669a-11	5.26	miRNA
mmu-mir-669a-12	5.26	miRNA
mmu-mir-669a-2	5.26	miRNA
mmu-mir-669a-3	5.11	miRNA
mmu-mir-669a-4	5.26	miRNA
mmu-mir-669a-5	5.26	miRNA
mmu-mir-669a-6	5.26	miRNA
mmu-mir-669a-7	5.26	miRNA
mmu-mir-669a-8	5.26	miRNA
mmu-mir-669a-9	5.26	miRNA
mmu-mir-669b	4.33	miRNA
mmu-mir-669c	36	miRNA
mmu-mir-669d	3.17	miRNA
mmu-mir-669d-2	3.17	miRNA
mmu-mir-669l	4.83	miRNA
mmu-mir-669m-1	5.33	miRNA
mmu-mir-669m-2	5.33	miRNA
mmu-mir-669o	14.17	miRNA
mmu-mir-669p-1	5.11	miRNA
mmu-mir-669p-2	5.11	miRNA
mmu-mir-670	3	miRNA
mmu-mir-671	5	miRNA
mmu-mir-672	25	miRNA
mmu-mir-673	4.5	miRNA
mmu-mir-674	61	miRNA
mmu-mir-676	42	miRNA
mmu-mir-679	2	miRNA
mmu-mir-701	1	miRNA
mmu-mir-708	12	miRNA
mmu-mir-744	9	miRNA
mmu-mir-760	8	miRNA
mmu-mir-7a-1	312.67	miRNA
mmu-mir-7a-2	193.67	miRNA
mmu-mir-7b	6	miRNA
mmu-mir-872	26	miRNA
mmu-mir-9-1	3760.84	miRNA
mmu-mir-9-2	3758.84	miRNA
mmu-mir-9-3	3714.84	miRNA
mmu-mir-92a-1	1060	miRNA
mmu-mir-92a-2	347	miRNA
mmu-mir-92b	497	miRNA
mmu-mir-93	982	miRNA
mmu-mir-96	4	miRNA
mmu-mir-98	4	miRNA
mmu-mir-99a	112	miRNA
mmu-mir-99b	295	miRNA
mmu-mir-668	4	Mirtron
uc007dyq.1_intron_2_0_chr1_186646286_r	4	Mirtron
uc007hml.1_intron_9_0_chr10_127819803_f	1	Mirtron
uc007jlx.1_intron_34_0_chr11_66913306_f	1	Mirtron
uc007lzp.1_intron_1_0_chr11_106644008_r.3p	2	Mirtron
uc007qrc.1_intron_5_0_chr13_55579042_r	29	Mirtron
uc007xfs.1_intron_2_0_chr15_89015895_r	1	Mirtron
uc007xfy.1_intron_29_0_chr15_89136089_r	1	Mirtron
uc008cds.1_intron_8_0_chr17_34978754_r	1	Mirtron
uc008cgz.1_intron_1_0_chr17_35380396_f.3p	1	Mirtron
uc008cjk.1_intron_10_0_chr17_36097675_r	6.5	Mirtron
uc008gij.1_intron_19_0_chr19_6346468_f	1	Mirtron
uc008gkz.1_intron_2_0_chr19_7496953_f	1	Mirtron
uc008jpc.1_intron_7_0_chr2_44878625_r.3p	1	Mirtron
uc008kxv.1_intron_7_0_chr2_92227541_r	1	Mirtron
uc008vku.1_intron_2_0_chr4_137872047_r.3p	2	Mirtron
uc008xdg.1_intron_5_0_chr5_35363056_f.3p	1	Mirtron
uc009abj.1_intron_12_0_chr5_137467312_f	14	Mirtron
uc009evl.1_intron_10_0_chr7_3607555_f	1	Mirtron
uc009fru.1_intron_2_0_chr7_26002687_r.3p	1	Mirtron
uc009inu.1_intron_12_0_chr7_108030820_r	3	Mirtron
uc009jvr.1_intron_6_0_chr7_134632765_f	3	Mirtron
uc009kls.1_intron_11_0_chr7_148806469_f	1	Mirtron
uc009kww.1_intron_11_0_chr8_13135970_f	1	Mirtron
uc009mca.1_intron_0_0_chr8_73419407_r	1	Mirtron
uc009mga.1_intron_13_0_chr8_74993915_r	1	Mirtron
uc009ugo.1_intron_1_0_chrX_131291882_f	1	Mirtron
	42642.2

## Sheet: Human
Human Locus	Ago_Reads	Type
uc001ako.2_intron_4_0_chr1_3551639_r	12	Candidate
uc001amh.2_intron_3_0_chr1_6270031_f	45	Candidate
uc001bfj.2_intron_61_0_chr1_22191567_r	129	Candidate
uc001bnz.1_intron_6_0_chr1_27687330_r	28	Candidate
uc001clg.2_intron_4_0_chr1_44451073_f	2	Candidate
uc001dxa.3_intron_16_0_chr1_109810683_f.3p	86	Candidate
uc001eto.2_intron_1_0_chr1_149937804_r.3p	161	Candidate
uc001fdn.3_intron_5_0_chr1_153945555_f	11	Candidate
uc001fpr.2_intron_2_0_chr1_156670845_r.3p	9	Candidate
uc001gvr.1_intron_17_0_chr1_200960854_r.3p	1	Candidate
uc001hsh.2_intron_6_0_chr1_228335401_f.3p	6	Candidate
uc001jvb.2_intron_0_0_chr10_75541958_f	3	Candidate
uc001ksp.2_intron_8_0_chr10_102797189_f.3p	2.25	Candidate
uc001kuo.2_intron_1_0_chr10_103916832_f	8	Candidate
uc001kuq.2_intron_1_0_chr10_103916832_f	8	Candidate
uc001kva.2_intron_14_0_chr10_104159952_f	1	Candidate
uc001neq.2_intron_2_0_chr11_47296711_f.3p	1	Candidate
uc001nkm.1_intron_0_0_chr11_57296392_r.3p	8	Candidate
uc001nzb.2_intron_2_0_chr11_64022289_f	2	Candidate
uc001nzq.1_intron_4_0_chr11_64082384_f	32	Candidate
uc001obg.2_intron_5_0_chr11_64559559_r	6	Candidate
uc001obx.2_intron_23_0_chr11_64675137_r	15.5	Candidate
uc001odu.3_intron_3_0_chr11_65161146_f	7	Candidate
uc001okc.1_intron_13_0_chr11_67069123_f	3	Candidate
uc001okr.2_intron_2_0_chr11_67160254_f.3p	2	Candidate
uc001ont.2_intron_5_0_chr11_68154181_f.3p	12.5	Candidate
uc001pyp.2_intron_0_0_chr11_122928537_r.3p	7	Candidate
uc001qds.2_intron_7_0_chr11_126278392_f.3p	3	Candidate
uc001qnt.2_intron_0_0_chr12_6438789_r	2	Candidate
uc001sbd.2_intron_2_0_chr12_53292684_r.3p	3	Candidate
uc001tob.2_intron_50_0_chr12_109703086_f	3	Candidate
uc001txo.2_intron_3_0_chr12_120569138_r.3p	18	Candidate
uc001txo.2_intron_52_0_chr12_120616754_r.3p	1	Candidate
uc001ubj.2_intron_5_0_chr12_122286983_r.3p	39	Candidate
uc001uiz.1_intron_7_0_chr12_132237909_f.3p	3	Candidate
uc001uje.2_intron_5_0_chr12_132393363_f	15	Candidate
uc001war.1_intron_28_0_chr14_21881156_r.3p	9	Candidate
uc001xed.2_intron_3_0_chr14_59925723_r.3p	48	Candidate
uc001xls.1_intron_2_0_chr14_70420250_f.3p	126	Candidate
uc001ynf.1_intron_4_0_chr14_103988288_r	1.23	Candidate
uc001zbj.2_intron_85_0_chr15_28518151_r.3p	2	Candidate
uc001ztb.2_intron_2_0_chr15_44092983_f	23	Candidate
uc002chm.2_intron_1_0_chr16_624764_f.3p	15	Candidate
uc002clv.2_intron_14_0_chr16_1505797_r	4	Candidate
uc002cos.1_intron_33_0_chr16_2162965_r	1	Candidate
uc002cqk.2_intron_5_0_chr16_2550492_f	44	Candidate
uc002dpf.3_intron_10_0_chr16_28402303_r.3p	4.5	Candidate
uc002dww.2_intron_3_0_chr16_30198267_f	1	Candidate
uc002dzs.1_intron_1_0_chr16_30795837_r.3p	6	Candidate
uc002dzz.1_intron_8_0_chr16_30953858_f.3p	7	Candidate
uc002egp.1_intron_17_0_chr16_50828340_f.3p	3	Candidate
uc002elz.1_intron_7_0_chr16_57690184_f	11	Candidate
uc002eux.1_intron_5_0_chr16_67970216_r	6	Candidate
uc002fsg.2_intron_0_0_chr17_909410_r.3p	18	Candidate
uc002fwx.1_intron_16_0_chr17_3853891_r	4.5	Candidate
uc002fyj.2_intron_6_0_chr17_4621048_f	1	Candidate
uc002fzo.1_intron_5_0_chr17_4842271_r	7	Candidate
uc002gct.1_intron_0_0_chr17_6347809_f.5p	1.08	Candidate
uc002gjp.2_intron_18_0_chr17_7852476_f	7	Candidate
uc002gqu.1_intron_15_0_chr17_17075180_f.3p	4	Candidate
uc002gsp.2_intron_9_0_chr17_18138627_f	2	Candidate
uc002hbn.2_intron_8_0_chr17_26890926_r.3p	4	Candidate
uc002hcq.1_intron_1_0_chr17_27074283_f.3p	22	Candidate
uc002hcs.2_intron_4_0_chr17_27075442_f	2	Candidate
uc002huk.1_intron_4_0_chr17_38508323_f	18	Candidate
uc002ieh.2_intron_14_0_chr17_41907476_r.3p	7	Candidate
uc002ign.2_intron_0_0_chr17_42397485_r	47	Candidate
uc002jlo.2_intron_0_0_chr17_72745427_f.3p	7.5	Candidate
uc002jni.1_intron_10_0_chr17_73238555_r	9	Candidate
uc002jth.2_intron_6_0_chr17_74901416_f.3p	3	Candidate
uc002kde.2_intron_1_0_chr17_79982216_f	23	Candidate
uc002kdg.2_intron_1_0_chr17_79994185_r	2	Candidate
uc002lrj.3_intron_25_0_chr19_1123639_r	45	Candidate
uc002lvg.2_intron_5_0_chr19_2246802_f	23	Candidate
uc002lwi.1_intron_5_0_chr19_2762643_r.3p	15	Candidate
uc002mcx.2_intron_7_0_chr19_5696769_r.3p	6	Candidate
uc002mfn.2_intron_13_0_chr19_6735716_r	55	Candidate
uc002mgo.2_intron_12_0_chr19_7598540_f	55	Candidate
uc002mki.1_intron_6_0_chr19_8651606_r	3	Candidate
uc002muf.1_intron_2_0_chr19_12788026_r	2	Candidate
uc002mvw.1_intron_6_0_chr19_13060223_f.3p	6	Candidate
uc002mwj.2_intron_8_0_chr19_13220816_r	12	Candidate
uc002mxv.2_intron_2_0_chr19_14074088_r	7	Candidate
uc002nxk.2_intron_1_0_chr19_35500234_f.3p	2	Candidate
uc002nyr.1_intron_2_0_chr19_35760603_f.3p	12	Candidate
uc002okf.1_intron_4_0_chr19_39440977_r.3p	32	Candidate
uc002ola.2_intron_6_0_chr19_39868465_f.3p	29	Candidate
uc002oxj.2_intron_3_0_chr19_44237886_r.3p	5	Candidate
uc002oxj.2_intron_4_0_chr19_44238648_r.3p	20	Candidate
uc002ozx.3_intron_4_0_chr19_45397139_f	1	Candidate
uc002pcg.2_intron_11_0_chr19_46029262_f	3	Candidate
uc002pkp.2_intron_4_0_chr19_49300280_r	1	Candidate
uc002qcs.1_intron_2_0_chr19_54483262_f.3p	36.88	Candidate
uc002qlt.2_intron_9_0_chr19_56180536_f	12	Candidate
uc002tra.1_intron_4_0_chr2_131103273_f	5	Candidate
uc002whd.2_intron_15_0_chr20_2844934_f	1	Candidate
uc002zww.2_intron_13_0_chr22_23632601_f.3p	12	Candidate
uc003aes.3_intron_6_0_chr22_29683124_f.3p	2	Candidate
uc003afq.2_intron_9_0_chr22_29924167_r	3	Candidate
uc003atr.2_intron_19_0_chr22_38165195_f	3	Candidate
uc003bjb.2_intron_2_0_chr22_50355017_f	46.55	Candidate
uc003buw.2_intron_19_0_chr3_10103896_f.3p	11.5	Candidate
uc003clf.2_intron_10_0_chr3_42576597_f	1	Candidate
uc003cqp.2_intron_17_0_chr3_47038537_f	2	Candidate
uc003cum.2_intron_7_0_chr3_48717663_r.3p	7	Candidate
uc003dbw.1_intron_10_0_chr3_51971603_r	5	Candidate
uc003dby.2_intron_4_0_chr3_51978927_f	115	Candidate
uc003gdr.3_intron_12_0_chr4_1807668_f	1	Candidate
uc003lam.1_intron_6_0_chr5_134705833_r.3p	3	Candidate
uc003lcf.1_intron_18_0_chr5_137503768_r.3p	38	Candidate
uc003mgx.2_intron_8_0_chr5_176894334_r	1	Candidate
uc003mhh.3_intron_2_0_chr5_176932112_r.3p	2	Candidate
uc003mik.1_intron_1_0_chr5_177546915_f	111	Candidate
uc003mim.2_intron_8_0_chr5_177574637_f	5	Candidate
uc003nsc.1_intron_10_0_chr6_30887626_f	9	Candidate
uc003nsq.3_intron_15_0_chr6_31124614_r	9	Candidate
uc003tte.2_intron_0_0_chr7_64126664_f.3p	41	Candidate
uc003ubo.2_intron_7_0_chr7_74438639_f	2	Candidate
uc003upz.2_intron_5_0_chr7_98988723_f	28.5	Candidate
uc003ykr.1_intron_35_0_chr8_103311776_r	2	Candidate
uc003yvn.2_intron_11_0_chr8_141567336_r.3p	2	Candidate
uc003zab.1_intron_4_0_chr8_145001504_r	50.5	Candidate
uc003zbt.3_intron_4_0_chr8_145534936_f	2	Candidate
uc004ars.1_intron_6_0_chr9_95005594_r.3p	7	Candidate
uc004bvw.2_intron_9_0_chr9_131476401_f	16	Candidate
uc004cpu.2_intron_2_0_chrX_1508621_r	37.5	Candidate
uc004dyy.2_intron_42_0_chrX_70361221_f.3p	12	Candidate
uc004fjr.1_intron_12_0_chrX_153285050_r	14	Candidate
uc004fju.2_intron_6_0_chrX_153284239_r	4	Candidate
uc004fph.2_intron_2_0_chrY_1458621_r	37.5	Candidate
uc009yqd.1_intron_11_0_chr11_64973193_f.3p	10	Candidate
uc009zbe.1_intron_10_0_chr11_123479511_f.3p	27	Candidate
uc009zpl.2_intron_1_0_chr12_57638009_r	4	Candidate
uc010bsa.1_intron_1_0_chr16_2012658_r	2	Candidate
uc010bsb.1_intron_3_0_chr16_2025440_f	23	Candidate
uc010bts.2_intron_1_0_chr16_4555612_f.3p	53.2	Candidate
uc010cgn.1_intron_2_0_chr16_72132945_f	5	Candidate
uc010cwp.1_intron_5_0_chr17_38241069_f.3p	2	Candidate
uc010cyj.2_intron_9_0_chr17_40717824_f	3	Candidate
uc010dtt.1_intron_14_0_chr19_4212696_f.3p	7	Candidate
uc010eei.2_intron_27_0_chr19_36223037_f	10.03	Candidate
uc010fya.1_intron_5_0_chr2_233346560_r.3p	216	Candidate
uc010lhs.2_intron_4_0_chr7_100853443_r	4	Candidate
uc010ruh.1_intron_8_0_chr11_95555741_f.3p	20	Candidate
uc010rxe.1_intron_2_0_chr11_117052688_f	23	Candidate
uc010sly.1_intron_8_0_chr12_49219553_f.3p	9.5	Candidate
uc010szo.1_intron_0_0_chr12_121442296_r.3p	60	Candidate
uc010utu.1_intron_5_0_chr15_102513556_f	7.16	Candidate
uc010vpb.1_intron_44_0_chr16_88804849_r	3	Candidate
uc010wsc.1_intron_11_0_chr17_73502011_r	7	Candidate
uc010wsc.1_intron_7_0_chr17_73500562_r	21	Candidate
uc010xlk.1_intron_2_0_chr19_11213463_f.3p	16	Candidate
uc010xss.1_intron_3_0_chr19_35760907_f	12	Candidate
uc010yel.1_intron_9_0_chr19_54650394_f.3p	3	Candidate
uc010yvj.1_intron_19_0_chr2_99181227_f.3p	24	Candidate
uc010yzf.1_intron_1_0_chr2_127808099_r	1	Candidate
uc010zyo.1_intron_2_0_chr20_48562026_f.3p	3	Candidate
uc011bmv.1_intron_13_0_chr3_139092255_r	17	Candidate
uc011bvq.1_intron_57_0_chr4_3227471_f.3p	1	Candidate
uc011czi.1_intron_6_0_chr5_139942085_r.5p	5	Candidate
uc011ktd.1_intron_1_0_chr7_143079541_f	8	Candidate
uc011mbg.1_intron_9_0_chr9_131342018_f.3p	3	Candidate
uc011mzn.1_intron_13_0_chrX_153582660_r	38	Candidate
hsa-let-7a-1	451442	miRNA
hsa-let-7a-2	451046	miRNA
hsa-let-7a-3	478362	miRNA
hsa-let-7b	2.82591e+06	miRNA
hsa-let-7c	713935	miRNA
hsa-let-7d	60653	miRNA
hsa-let-7e	71547	miRNA
hsa-let-7f-1	557482	miRNA
hsa-let-7f-2	555822	miRNA
hsa-let-7g	127663	miRNA
hsa-let-7i	184375	miRNA
hsa-mir-1-1	47.33	miRNA
hsa-mir-1-2	47.33	miRNA
hsa-mir-100	327714	miRNA
hsa-mir-101-1	134062	miRNA
hsa-mir-101-2	138657	miRNA
hsa-mir-103a-1	42736.1	miRNA
hsa-mir-103a-2	42746.1	miRNA
hsa-mir-105-1	7570.83	miRNA
hsa-mir-105-2	7579.83	miRNA
hsa-mir-106a	857.75	miRNA
hsa-mir-106b	33203.2	miRNA
hsa-mir-107	1005.59	miRNA
hsa-mir-10a	404686	miRNA
hsa-mir-10b	84860	miRNA
hsa-mir-1179	6	miRNA
hsa-mir-1180	198	miRNA
hsa-mir-1181	2	miRNA
hsa-mir-1206	1	miRNA
hsa-mir-122	62.5	miRNA
hsa-mir-124-1	1.33	miRNA
hsa-mir-124-2	1.33	miRNA
hsa-mir-124-3	1.33	miRNA
hsa-mir-1244-1	2.84	miRNA
hsa-mir-1244-2	2.84	miRNA
hsa-mir-1244-3	2.84	miRNA
hsa-mir-1246	139.73	miRNA
hsa-mir-1247	2181	miRNA
hsa-mir-1248	155	miRNA
hsa-mir-1249	48	miRNA
hsa-mir-1250	22	miRNA
hsa-mir-1251	1231.5	miRNA
hsa-mir-1252	7	miRNA
hsa-mir-1253	1	miRNA
hsa-mir-1254	76.5	miRNA
hsa-mir-1254-2	76.5	miRNA
hsa-mir-1255a	131.56	miRNA
hsa-mir-1255b-1	1.94	miRNA
hsa-mir-1255b-2	1.94	miRNA
hsa-mir-1256	13	miRNA
hsa-mir-125a	77511	miRNA
hsa-mir-125b-1	11237.8	miRNA
hsa-mir-125b-2	15244.2	miRNA
hsa-mir-126	8597.17	miRNA
hsa-mir-1260b	4.62	miRNA
hsa-mir-1262	6287	miRNA
hsa-mir-1266	716	miRNA
hsa-mir-1268	3.95	miRNA
hsa-mir-1268b	4.19	miRNA
hsa-mir-1269	53	miRNA
hsa-mir-1269b	1	miRNA
hsa-mir-127	15	miRNA
hsa-mir-1271	1	miRNA
hsa-mir-1273c	4.83	miRNA
hsa-mir-1273d	48.89	miRNA
hsa-mir-1275	3	miRNA
hsa-mir-1276	2678.5	miRNA
hsa-mir-1277	158.6	miRNA
hsa-mir-1278	62	miRNA
hsa-mir-128-1	1674	miRNA
hsa-mir-128-2	1494	miRNA
hsa-mir-1283-1	1	miRNA
hsa-mir-1283-2	6	miRNA
hsa-mir-1284	4	miRNA
hsa-mir-1285-1	221.3	miRNA
hsa-mir-1285-2	170.84	miRNA
hsa-mir-1286	10	miRNA
hsa-mir-1287	43	miRNA
hsa-mir-1288	9	miRNA
hsa-mir-1289-1	4	miRNA
hsa-mir-129-1	29	miRNA
hsa-mir-129-2	35	miRNA
hsa-mir-1290	2.5	miRNA
hsa-mir-1291	39.67	miRNA
hsa-mir-1293	353	miRNA
hsa-mir-1294	13	miRNA
hsa-mir-1295	1	miRNA
hsa-mir-1296	32.5	miRNA
hsa-mir-1298	6	miRNA
hsa-mir-1299	13	miRNA
hsa-mir-1301	100	miRNA
hsa-mir-1303	41.63	miRNA
hsa-mir-1304	332.87	miRNA
hsa-mir-1305	112	miRNA
hsa-mir-1306	238	miRNA
hsa-mir-1307	21511	miRNA
hsa-mir-130a	1331	miRNA
hsa-mir-130b	6501.5	miRNA
hsa-mir-132	2586	miRNA
hsa-mir-1323	11	miRNA
hsa-mir-134	10	miRNA
hsa-mir-1343	18	miRNA
hsa-mir-135a-1	1386.75	miRNA
hsa-mir-135a-2	1458.75	miRNA
hsa-mir-135b	1457.5	miRNA
hsa-mir-136	1	miRNA
hsa-mir-137	1	miRNA
hsa-mir-138-1	12	miRNA
hsa-mir-138-2	8	miRNA
hsa-mir-139	272	miRNA
hsa-mir-140	101643	miRNA
hsa-mir-141	14151	miRNA
hsa-mir-142	114.5	miRNA
hsa-mir-143	2621	miRNA
hsa-mir-144	18	miRNA
hsa-mir-145	1	miRNA
hsa-mir-1468	42	miRNA
hsa-mir-146a	113.25	miRNA
hsa-mir-146b	14784.2	miRNA
hsa-mir-147b	8	miRNA
hsa-mir-148a	31688	miRNA
hsa-mir-148b	51871.5	miRNA
hsa-mir-149	802.58	miRNA
hsa-mir-150	4.5	miRNA
hsa-mir-151	285732	miRNA
hsa-mir-151b	205.17	miRNA
hsa-mir-152	1312.5	miRNA
hsa-mir-153-1	8	miRNA
hsa-mir-153-2	4	miRNA
hsa-mir-155	85	miRNA
hsa-mir-15a	4314.5	miRNA
hsa-mir-15b	3499.5	miRNA
hsa-mir-16-1	10664	miRNA
hsa-mir-16-2	11358.5	miRNA
hsa-mir-17	56785.2	miRNA
hsa-mir-181a-1	20958.5	miRNA
hsa-mir-181a-2	22257.5	miRNA
hsa-mir-181b-1	25810	miRNA
hsa-mir-181b-2	25768	miRNA
hsa-mir-181c	695	miRNA
hsa-mir-181d	3670	miRNA
hsa-mir-182	1334142	miRNA
hsa-mir-1827	174	miRNA
hsa-mir-183	643276	miRNA
hsa-mir-184	668	miRNA
hsa-mir-185	2267.5	miRNA
hsa-mir-186	275426	miRNA
hsa-mir-187	1	miRNA
hsa-mir-188	728	miRNA
hsa-mir-18a	5672	miRNA
hsa-mir-18b	20	miRNA
hsa-mir-190	142	miRNA
hsa-mir-1908	150	miRNA
hsa-mir-190b	91	miRNA
hsa-mir-191	162353	miRNA
hsa-mir-1910	58.17	miRNA
hsa-mir-1911	78	miRNA
hsa-mir-1912	1	miRNA
hsa-mir-1913	3	miRNA
hsa-mir-1914	25	miRNA
hsa-mir-1915	57	miRNA
hsa-mir-192	46933.7	miRNA
hsa-mir-193a	2847	miRNA
hsa-mir-193b	3874	miRNA
hsa-mir-194-1	1302.5	miRNA
hsa-mir-194-2	1512	miRNA
hsa-mir-195	1222.46	miRNA
hsa-mir-196a-1	212590	miRNA
hsa-mir-196a-2	222936	miRNA
hsa-mir-196b	22555	miRNA
hsa-mir-197	6239	miRNA
hsa-mir-199a-1	16.84	miRNA
hsa-mir-199a-2	16.84	miRNA
hsa-mir-199b	27.34	miRNA
hsa-mir-19a	1145.5	miRNA
hsa-mir-19b-1	1108	miRNA
hsa-mir-19b-2	1095	miRNA
hsa-mir-200a	1410	miRNA
hsa-mir-200b	11397.5	miRNA
hsa-mir-200c	280294	miRNA
hsa-mir-202	1	miRNA
hsa-mir-203	78078.3	miRNA
hsa-mir-205	43	miRNA
hsa-mir-206	8	miRNA
hsa-mir-208b	1	miRNA
hsa-mir-20a	58635.5	miRNA
hsa-mir-20b	3	miRNA
hsa-mir-21	5672610	miRNA
hsa-mir-210	1434	miRNA
hsa-mir-2110	277	miRNA
hsa-mir-2114	1	miRNA
hsa-mir-2116	11	miRNA
hsa-mir-212	51	miRNA
hsa-mir-214	6	miRNA
hsa-mir-215	1772.16	miRNA
hsa-mir-216a	19	miRNA
hsa-mir-216b	36	miRNA
hsa-mir-217	65	miRNA
hsa-mir-218-1	20	miRNA
hsa-mir-218-2	18	miRNA
hsa-mir-219-1	630.5	miRNA
hsa-mir-219-2	1.5	miRNA
hsa-mir-22	1599	miRNA
hsa-mir-221	4498.5	miRNA
hsa-mir-222	2476.75	miRNA
hsa-mir-223	5	miRNA
hsa-mir-224	16131	miRNA
hsa-mir-2276	387	miRNA
hsa-mir-2277	15	miRNA
hsa-mir-2278	17	miRNA
hsa-mir-2355	74	miRNA
hsa-mir-23a	24365.8	miRNA
hsa-mir-23b	9260.5	miRNA
hsa-mir-23c	262	miRNA
hsa-mir-24-1	180281	miRNA
hsa-mir-24-2	188447	miRNA
hsa-mir-2467	3	miRNA
hsa-mir-25	56354	miRNA
hsa-mir-26a-1	14437.8	miRNA
hsa-mir-26a-2	14438.8	miRNA
hsa-mir-26b	6309	miRNA
hsa-mir-27a	114032	miRNA
hsa-mir-27b	88052.7	miRNA
hsa-mir-28	70600.8	miRNA
hsa-mir-296	4619.16	miRNA
hsa-mir-2964a	2.5	miRNA
hsa-mir-29a	8970	miRNA
hsa-mir-29b-1	2265.67	miRNA
hsa-mir-29b-2	2026.34	miRNA
hsa-mir-29c	373.67	miRNA
hsa-mir-301a	4475.5	miRNA
hsa-mir-301b	400	miRNA
hsa-mir-302b	2	miRNA
hsa-mir-302d	1	miRNA
hsa-mir-3065	318	miRNA
hsa-mir-3074	85.5	miRNA
hsa-mir-30a	3177830	miRNA
hsa-mir-30b	2308.83	miRNA
hsa-mir-30c-1	25562.7	miRNA
hsa-mir-30c-2	34049.3	miRNA
hsa-mir-30d	927904	miRNA
hsa-mir-30e	246360	miRNA
hsa-mir-31	25516	miRNA
hsa-mir-3115	8	miRNA
hsa-mir-3116-1	1.36	miRNA
hsa-mir-3116-2	1.36	miRNA
hsa-mir-3120	8	miRNA
hsa-mir-3121	64	miRNA
hsa-mir-3122	114	miRNA
hsa-mir-3124	13	miRNA
hsa-mir-3126	198	miRNA
hsa-mir-3127	1506.83	miRNA
hsa-mir-3128	5	miRNA
hsa-mir-3129	561	miRNA
hsa-mir-3130-1	11.5	miRNA
hsa-mir-3130-2	14.5	miRNA
hsa-mir-3131	112	miRNA
hsa-mir-3132	3	miRNA
hsa-mir-3134	1	miRNA
hsa-mir-3136	8	miRNA
hsa-mir-3137	4	miRNA
hsa-mir-3138	53.5	miRNA
hsa-mir-3139	5	miRNA
hsa-mir-3140	156.67	miRNA
hsa-mir-3144	5	miRNA
hsa-mir-3145	1	miRNA
hsa-mir-3146	134	miRNA
hsa-mir-3148	2	miRNA
hsa-mir-3149	36	miRNA
hsa-mir-3150a	32	miRNA
hsa-mir-3150b	8	miRNA
hsa-mir-3152	21	miRNA
hsa-mir-3153	5	miRNA
hsa-mir-3155	12	miRNA
hsa-mir-3157	1	miRNA
hsa-mir-3158-1	260.84	miRNA
hsa-mir-3158-2	261.84	miRNA
hsa-mir-3161	6.25	miRNA
hsa-mir-3162	8	miRNA
hsa-mir-3163	94	miRNA
hsa-mir-3164	54.5	miRNA
hsa-mir-3170	29	miRNA
hsa-mir-3173	27	miRNA
hsa-mir-3174	39	miRNA
hsa-mir-3175	57	miRNA
hsa-mir-3176	993.2	miRNA
hsa-mir-3177	307.5	miRNA
hsa-mir-3179-1	1.58	miRNA
hsa-mir-3179-2	1.58	miRNA
hsa-mir-3179-3	1.58	miRNA
hsa-mir-3180-1	5.6	miRNA
hsa-mir-3180-2	5.6	miRNA
hsa-mir-3180-3	5.6	miRNA
hsa-mir-3180-4	5.6	miRNA
hsa-mir-3180-5	5.6	miRNA
hsa-mir-3181	7	miRNA
hsa-mir-3183	2	miRNA
hsa-mir-3184	13	miRNA
hsa-mir-3187	39	miRNA
hsa-mir-3188	54	miRNA
hsa-mir-3189	27	miRNA
hsa-mir-3190	38	miRNA
hsa-mir-3191	19	miRNA
hsa-mir-3192	79	miRNA
hsa-mir-3193	29	miRNA
hsa-mir-3194	20.5	miRNA
hsa-mir-3196	1.79	miRNA
hsa-mir-3197	122	miRNA
hsa-mir-3198-1	79.5	miRNA
hsa-mir-3198-2	79.5	miRNA
hsa-mir-3199-1	10	miRNA
hsa-mir-3199-2	10	miRNA
hsa-mir-32	2627	miRNA
hsa-mir-3200	118	miRNA
hsa-mir-320a	19640.3	miRNA
hsa-mir-320b-1	732.81	miRNA
hsa-mir-320b-2	732.81	miRNA
hsa-mir-320c-1	707.31	miRNA
hsa-mir-320c-2	627.31	miRNA
hsa-mir-320d-1	491.78	miRNA
hsa-mir-320d-2	479.78	miRNA
hsa-mir-320e	26.11	miRNA
hsa-mir-323	1	miRNA
hsa-mir-324	1827.5	miRNA
hsa-mir-326	140	miRNA
hsa-mir-328	38	miRNA
hsa-mir-330	2772.43	miRNA
hsa-mir-331	429	miRNA
hsa-mir-335	2174	miRNA
hsa-mir-337	5	miRNA
hsa-mir-338	160	miRNA
hsa-mir-339	2479.29	miRNA
hsa-mir-33a	2089.5	miRNA
hsa-mir-33b	2276.5	miRNA
hsa-mir-340	2025.16	miRNA
hsa-mir-342	64092	miRNA
hsa-mir-345	3275.08	miRNA
hsa-mir-34a	603	miRNA
hsa-mir-34c	186	miRNA
hsa-mir-3529	3	miRNA
hsa-mir-3545	30	miRNA
hsa-mir-3607	1	miRNA
hsa-mir-3609	51	miRNA
hsa-mir-361	2774.94	miRNA
hsa-mir-3610	1	miRNA
hsa-mir-3611	12	miRNA
hsa-mir-3613	368.26	miRNA
hsa-mir-3614	215	miRNA
hsa-mir-3615	1704	miRNA
hsa-mir-3616	2	miRNA
hsa-mir-3617	1	miRNA
hsa-mir-3618	18	miRNA
hsa-mir-3619	627.6	miRNA
hsa-mir-362	583	miRNA
hsa-mir-3622a	63	miRNA
hsa-mir-3622b	4	miRNA
hsa-mir-363	9	miRNA
hsa-mir-3646	34	miRNA
hsa-mir-3647	7	miRNA
hsa-mir-3648	15	miRNA
hsa-mir-365-1	5706	miRNA
hsa-mir-365-2	6921	miRNA
hsa-mir-3651	2	miRNA
hsa-mir-3652	9	miRNA
hsa-mir-3653	4.5	miRNA
hsa-mir-3654	1.67	miRNA
hsa-mir-3655	3	miRNA
hsa-mir-3656	87	miRNA
hsa-mir-3659	7	miRNA
hsa-mir-3660	43	miRNA
hsa-mir-3661	57	miRNA
hsa-mir-3663	1	miRNA
hsa-mir-3664	80.25	miRNA
hsa-mir-3667	56	miRNA
hsa-mir-3672	1	miRNA
hsa-mir-3676	7.54	miRNA
hsa-mir-3677	37.5	miRNA
hsa-mir-3678	1.5	miRNA
hsa-mir-3679	29.5	miRNA
hsa-mir-3680	24.33	miRNA
hsa-mir-3681	2	miRNA
hsa-mir-3682	203	miRNA
hsa-mir-3684	19	miRNA
hsa-mir-3685	11	miRNA
hsa-mir-3687	32	miRNA
hsa-mir-3688-1	37.5	miRNA
hsa-mir-3688-2	37.5	miRNA
hsa-mir-369	3	miRNA
hsa-mir-3691	1350	miRNA
hsa-mir-3692	59	miRNA
hsa-mir-371	1	miRNA
hsa-mir-371b	1	miRNA
hsa-mir-372	9	miRNA
hsa-mir-374a	20333.8	miRNA
hsa-mir-374b	2551.17	miRNA
hsa-mir-374c	4.83	miRNA
hsa-mir-375	9328	miRNA
hsa-mir-376a-1	1	miRNA
hsa-mir-376b	3	miRNA
hsa-mir-376c	3	miRNA
hsa-mir-378	3.79453e+06	miRNA
hsa-mir-378b	57356.7	miRNA
hsa-mir-378c	10587.3	miRNA
hsa-mir-378d-1	6208.01	miRNA
hsa-mir-378d-2	5663.48	miRNA
hsa-mir-378e	2124.89	miRNA
hsa-mir-378f	1182.44	miRNA
hsa-mir-378g	2662.15	miRNA
hsa-mir-378h	1338.5	miRNA
hsa-mir-378i	1336.46	miRNA
hsa-mir-379	28	miRNA
hsa-mir-381	2	miRNA
hsa-mir-382	7	miRNA
hsa-mir-3909	7	miRNA
hsa-mir-3910-1	3.5	miRNA
hsa-mir-3910-2	3.5	miRNA
hsa-mir-3911	309	miRNA
hsa-mir-3912	73	miRNA
hsa-mir-3913-1	17	miRNA
hsa-mir-3913-2	17	miRNA
hsa-mir-3918	3	miRNA
hsa-mir-3920	1	miRNA
hsa-mir-3922	8	miRNA
hsa-mir-3923	1	miRNA
hsa-mir-3925	98	miRNA
hsa-mir-3926-1	25	miRNA
hsa-mir-3926-2	15	miRNA
hsa-mir-3928	4535	miRNA
hsa-mir-3929	11.51	miRNA
hsa-mir-3934	2831.25	miRNA
hsa-mir-3935	1140	miRNA
hsa-mir-3936	170	miRNA
hsa-mir-3937	2	miRNA
hsa-mir-3938	4	miRNA
hsa-mir-3939	2	miRNA
hsa-mir-3941	19	miRNA
hsa-mir-3942	36	miRNA
hsa-mir-3944	12.5	miRNA
hsa-mir-409	8	miRNA
hsa-mir-411	21	miRNA
hsa-mir-421	7457.35	miRNA
hsa-mir-422a	12	miRNA
hsa-mir-423	58209.3	miRNA
hsa-mir-424	31955.5	miRNA
hsa-mir-425	20621	miRNA
hsa-mir-429	809.5	miRNA
hsa-mir-4306	5.25	miRNA
hsa-mir-4326	220.33	miRNA
hsa-mir-4421	3.17	miRNA
hsa-mir-4427	279	miRNA
hsa-mir-4428	4	miRNA
hsa-mir-4429	39.16	miRNA
hsa-mir-4435-1	354	miRNA
hsa-mir-4435-2	354	miRNA
hsa-mir-4442	1	miRNA
hsa-mir-4443	5	miRNA
hsa-mir-4444	25.67	miRNA
hsa-mir-4446	2550.27	miRNA
hsa-mir-4448	3.33	miRNA
hsa-mir-4449	28	miRNA
hsa-mir-4450	275	miRNA
hsa-mir-4454	1.44	miRNA
hsa-mir-4457	10	miRNA
hsa-mir-4461	28.17	miRNA
hsa-mir-4466	220	miRNA
hsa-mir-4469	3	miRNA
hsa-mir-4473	315	miRNA
hsa-mir-4474	6	miRNA
hsa-mir-4476	1	miRNA
hsa-mir-4477a	2	miRNA
hsa-mir-4477b	10.5	miRNA
hsa-mir-4479	9	miRNA
hsa-mir-448	7	miRNA
hsa-mir-4482	58	miRNA
hsa-mir-4485	13.25	miRNA
hsa-mir-4488	214.17	miRNA
hsa-mir-4489	6	miRNA
hsa-mir-4492	25	miRNA
hsa-mir-4498	49	miRNA
hsa-mir-449b	2	miRNA
hsa-mir-449c	2	miRNA
hsa-mir-4501	4	miRNA
hsa-mir-4504	286	miRNA
hsa-mir-4508	7.83	miRNA
hsa-mir-450a-1	106	miRNA
hsa-mir-450a-2	106	miRNA
hsa-mir-450b	1225	miRNA
hsa-mir-451	6	miRNA
hsa-mir-4510	85	miRNA
hsa-mir-4511	125	miRNA
hsa-mir-4512	31.27	miRNA
hsa-mir-4515	7	miRNA
hsa-mir-4516	48	miRNA
hsa-mir-452	18002.7	miRNA
hsa-mir-4520a	4.33	miRNA
hsa-mir-4520b	4.33	miRNA
hsa-mir-4521	3	miRNA
hsa-mir-4523	12	miRNA
hsa-mir-4525	12	miRNA
hsa-mir-4526	2	miRNA
hsa-mir-4532	156	miRNA
hsa-mir-454	1289	miRNA
hsa-mir-455	836	miRNA
hsa-mir-4635	2	miRNA
hsa-mir-4637	22	miRNA
hsa-mir-4638	37	miRNA
hsa-mir-4642	6	miRNA
hsa-mir-4644	7	miRNA
hsa-mir-4645	2	miRNA
hsa-mir-4647	9.5	miRNA
hsa-mir-4648	11	miRNA
hsa-mir-4652	80	miRNA
hsa-mir-4653	1	miRNA
hsa-mir-4654	91	miRNA
hsa-mir-4655	14	miRNA
hsa-mir-4657	15	miRNA
hsa-mir-4658	19	miRNA
hsa-mir-4659a	7	miRNA
hsa-mir-4660	17	miRNA
hsa-mir-4661	184	miRNA
hsa-mir-4662a	19	miRNA
hsa-mir-4662b	1	miRNA
hsa-mir-4664	50	miRNA
hsa-mir-4665	11	miRNA
hsa-mir-4666	5	miRNA
hsa-mir-4669	30	miRNA
hsa-mir-4670	1.5	miRNA
hsa-mir-4672	3	miRNA
hsa-mir-4674	3	miRNA
hsa-mir-4675	1	miRNA
hsa-mir-4676	5	miRNA
hsa-mir-4677	75	miRNA
hsa-mir-4680	39	miRNA
hsa-mir-4686	2	miRNA
hsa-mir-4687	7	miRNA
hsa-mir-4689	3	miRNA
hsa-mir-4691	19	miRNA
hsa-mir-4694	1	miRNA
hsa-mir-4698	2	miRNA
hsa-mir-4699	1	miRNA
hsa-mir-4700	6	miRNA
hsa-mir-4707	74	miRNA
hsa-mir-4708	2	miRNA
hsa-mir-4713	5	miRNA
hsa-mir-4714	32	miRNA
hsa-mir-4715	1	miRNA
hsa-mir-4716	3.5	miRNA
hsa-mir-4717	14.17	miRNA
hsa-mir-4720	1	miRNA
hsa-mir-4721	150	miRNA
hsa-mir-4723	4	miRNA
hsa-mir-4724	19	miRNA
hsa-mir-4725	20	miRNA
hsa-mir-4729	1	miRNA
hsa-mir-4730	2	miRNA
hsa-mir-4731	2	miRNA
hsa-mir-4733	4	miRNA
hsa-mir-4734	1	miRNA
hsa-mir-4737	1.85	miRNA
hsa-mir-4738	42	miRNA
hsa-mir-4739	1	miRNA
hsa-mir-4740	20	miRNA
hsa-mir-4741	115	miRNA
hsa-mir-4744	1	miRNA
hsa-mir-4746	428	miRNA
hsa-mir-4748	9	miRNA
hsa-mir-4751	16	miRNA
hsa-mir-4753	27	miRNA
hsa-mir-4754	2	miRNA
hsa-mir-4755	1	miRNA
hsa-mir-4756	7	miRNA
hsa-mir-4757	5	miRNA
hsa-mir-4760	309	miRNA
hsa-mir-4762	13	miRNA
hsa-mir-4763	7	miRNA
hsa-mir-4764	3	miRNA
hsa-mir-4765	2	miRNA
hsa-mir-4766	60	miRNA
hsa-mir-4768	17.5	miRNA
hsa-mir-4769	11	miRNA
hsa-mir-4771-1	5	miRNA
hsa-mir-4771-2	5	miRNA
hsa-mir-4772	1	miRNA
hsa-mir-4774	3	miRNA
hsa-mir-4775	39	miRNA
hsa-mir-4778	2	miRNA
hsa-mir-4779	70	miRNA
hsa-mir-4781	100	miRNA
hsa-mir-4782	1	miRNA
hsa-mir-4783	23	miRNA
hsa-mir-4784	34	miRNA
hsa-mir-4786	69	miRNA
hsa-mir-4787	31	miRNA
hsa-mir-4788	1.5	miRNA
hsa-mir-4789	7	miRNA
hsa-mir-4793	51	miRNA
hsa-mir-4794	1	miRNA
hsa-mir-4795	1	miRNA
hsa-mir-4797	15	miRNA
hsa-mir-4798	188	miRNA
hsa-mir-4799	2	miRNA
hsa-mir-4800	3	miRNA
hsa-mir-4802	178	miRNA
hsa-mir-4803	1	miRNA
hsa-mir-4804	14	miRNA
hsa-mir-483	6	miRNA
hsa-mir-484	738.5	miRNA
hsa-mir-486	1222.17	miRNA
hsa-mir-489	12474	miRNA
hsa-mir-491	15	miRNA
hsa-mir-492	2.5	miRNA
hsa-mir-493	2	miRNA
hsa-mir-497	252	miRNA
hsa-mir-499	5	miRNA
hsa-mir-500a	629.5	miRNA
hsa-mir-500b	239.5	miRNA
hsa-mir-501	1073.5	miRNA
hsa-mir-502	251	miRNA
hsa-mir-503	5357	miRNA
hsa-mir-504	33	miRNA
hsa-mir-5047	2	miRNA
hsa-mir-505	2884	miRNA
hsa-mir-506	9	miRNA
hsa-mir-508	30	miRNA
hsa-mir-509-1	9.67	miRNA
hsa-mir-509-2	9.67	miRNA
hsa-mir-509-3	12.67	miRNA
hsa-mir-511-1	24.5	miRNA
hsa-mir-511-2	24.5	miRNA
hsa-mir-513b	1	miRNA
hsa-mir-514-1	2.66	miRNA
hsa-mir-514-2	2.66	miRNA
hsa-mir-514-3	2.66	miRNA
hsa-mir-515-1	1	miRNA
hsa-mir-515-2	1	miRNA
hsa-mir-516a-1	5.5	miRNA
hsa-mir-516a-2	5.5	miRNA
hsa-mir-517c	3	miRNA
hsa-mir-518b	1	miRNA
hsa-mir-519a-1	2	miRNA
hsa-mir-519a-2	1.5	miRNA
hsa-mir-520a	1	miRNA
hsa-mir-520b	1.5	miRNA
hsa-mir-520f	3	miRNA
hsa-mir-522	8	miRNA
hsa-mir-526a-1	1	miRNA
hsa-mir-532	10441	miRNA
hsa-mir-542	3755	miRNA
hsa-mir-544b	1	miRNA
hsa-mir-545	145.05	miRNA
hsa-mir-548a-1	2.25	miRNA
hsa-mir-548a-2	2.25	miRNA
hsa-mir-548a-3	2.25	miRNA
hsa-mir-548ab	4.36	miRNA
hsa-mir-548ac	7.02	miRNA
hsa-mir-548ah	151.3	miRNA
hsa-mir-548al	5	miRNA
hsa-mir-548am	1.83	miRNA
hsa-mir-548d-1	8.23	miRNA
hsa-mir-548d-2	8.23	miRNA
hsa-mir-548e	514.5	miRNA
hsa-mir-548f-1	65.05	miRNA
hsa-mir-548f-2	20.72	miRNA
hsa-mir-548f-3	20.72	miRNA
hsa-mir-548f-4	1.05	miRNA
hsa-mir-548f-5	1.29	miRNA
hsa-mir-548h-3	1.21	miRNA
hsa-mir-548j	166.97	miRNA
hsa-mir-548k	48.04	miRNA
hsa-mir-548l	29	miRNA
hsa-mir-548n	38.36	miRNA
hsa-mir-548o	154.76	miRNA
hsa-mir-548o-2	155.04	miRNA
hsa-mir-548p	4.61	miRNA
hsa-mir-548q	17.43	miRNA
hsa-mir-548t	110.74	miRNA
hsa-mir-548u	17.08	miRNA
hsa-mir-548v	19.07	miRNA
hsa-mir-549	10	miRNA
hsa-mir-550a-1	218.67	miRNA
hsa-mir-550a-2	218.67	miRNA
hsa-mir-550a-3	66.67	miRNA
hsa-mir-550b-1	1	miRNA
hsa-mir-550b-2	1	miRNA
hsa-mir-551a	2	miRNA
hsa-mir-552	1	miRNA
hsa-mir-556	448	miRNA
hsa-mir-559	2	miRNA
hsa-mir-561	21	miRNA
hsa-mir-570	37.83	miRNA
hsa-mir-574	337.14	miRNA
hsa-mir-576	401.12	miRNA
hsa-mir-577	11954.8	miRNA
hsa-mir-579	34	miRNA
hsa-mir-580	68.5	miRNA
hsa-mir-581	54	miRNA
hsa-mir-582	28208.5	miRNA
hsa-mir-584	581	miRNA
hsa-mir-586	12	miRNA
hsa-mir-589	4187	miRNA
hsa-mir-590	1267.33	miRNA
hsa-mir-592	1	miRNA
hsa-mir-597	26	miRNA
hsa-mir-598	1768.5	miRNA
hsa-mir-599	4	miRNA
hsa-mir-600	4	miRNA
hsa-mir-601	1	miRNA
hsa-mir-602	20	miRNA
hsa-mir-607	36.33	miRNA
hsa-mir-609	2	miRNA
hsa-mir-612	1	miRNA
hsa-mir-615	477	miRNA
hsa-mir-616	130.5	miRNA
hsa-mir-618	60	miRNA
hsa-mir-620	3	miRNA
hsa-mir-622	3.19	miRNA
hsa-mir-624	20	miRNA
hsa-mir-625	766	miRNA
hsa-mir-627	469.83	miRNA
hsa-mir-628	650	miRNA
hsa-mir-629	9536	miRNA
hsa-mir-631	1	miRNA
hsa-mir-636	12	miRNA
hsa-mir-641	39	miRNA
hsa-mir-642a	5.5	miRNA
hsa-mir-643	30	miRNA
hsa-mir-651	161	miRNA
hsa-mir-652	3819	miRNA
hsa-mir-653	617.17	miRNA
hsa-mir-658	1	miRNA
hsa-mir-659	204.5	miRNA
hsa-mir-660	541	miRNA
hsa-mir-662	9	miRNA
hsa-mir-663	42.5	miRNA
hsa-mir-663b	1	miRNA
hsa-mir-664	381	miRNA
hsa-mir-668	3	miRNA
hsa-mir-671	657.93	miRNA
hsa-mir-675	3	miRNA
hsa-mir-676	11	miRNA
hsa-mir-7-1	7150.25	miRNA
hsa-mir-7-2	6779.25	miRNA
hsa-mir-7-3	6743.25	miRNA
hsa-mir-708	44.12	miRNA
hsa-mir-720	10.68	miRNA
hsa-mir-744	32544	miRNA
hsa-mir-760	2732.33	miRNA
hsa-mir-765	40.25	miRNA
hsa-mir-766	114	miRNA
hsa-mir-767	6481	miRNA
hsa-mir-769	3364	miRNA
hsa-mir-873	284	miRNA
hsa-mir-874	12	miRNA
hsa-mir-876	19	miRNA
hsa-mir-885	1.5	miRNA
hsa-mir-887	1	miRNA
hsa-mir-889	3	miRNA
hsa-mir-891a	36	miRNA
hsa-mir-9-1	1117	miRNA
hsa-mir-9-2	1117	miRNA
hsa-mir-9-3	1121	miRNA
hsa-mir-92a-1	126356	miRNA
hsa-mir-92a-2	121802	miRNA
hsa-mir-92b	45908	miRNA
hsa-mir-93	342096	miRNA
hsa-mir-933	19	miRNA
hsa-mir-934	1	miRNA
hsa-mir-935	197	miRNA
hsa-mir-936	2	miRNA
hsa-mir-940	29.5	miRNA
hsa-mir-941-1	643.29	miRNA
hsa-mir-941-3	643.29	miRNA
hsa-mir-942	815	miRNA
hsa-mir-943	1	miRNA
hsa-mir-944	43	miRNA
hsa-mir-95	1156.11	miRNA
hsa-mir-96	4488	miRNA
hsa-mir-98	19443	miRNA
hsa-mir-99a	27325	miRNA
hsa-mir-99b	2799501	miRNA
uc001aee.1_intron_3_0_chr1_1247882_r	2	Mirtron
uc001api.1_intron_5_0_chr1_8926561_r.3p	107	Mirtron
uc001ato.1_intron_4_0_chr1_12089199_f	3	Mirtron
uc001aub.2_intron_2_0_chr1_12638985_r	24	Mirtron
uc001bjq.2_intron_2_0_chr1_25245836_r.3p	14	Mirtron
uc001bxe.1_intron_4_0_chr1_33798006_r.3p	301	Mirtron
uc001cbb.3_intron_1_0_chr1_37941541_f.3p	6	Mirtron
uc001cim.2_intron_6_0_chr1_43637323_r	11	Mirtron
uc001ciz.2_intron_2_0_chr1_43830319_r	36.73	Mirtron
uc001cjk.1_intron_53_0_chr1_43914156_f	12	Mirtron
uc001eoc.1_intron_10_0_chr1_145584298_f	5	Mirtron
uc001fdh.2_intron_1_0_chr1_153934827_r	4	Mirtron
uc001fge.1_intron_4_0_chr1_154962734_f	3.33	Mirtron
uc001fmr.2_intron_2_0_chr1_155921064_r	13	Mirtron
uc001gwu.2_intron_17_0_chr1_201777739_f	2	Mirtron
uc001gwz.2_intron_12_0_chr1_201828123_f.3p	13	Mirtron
uc001gxd.2_intron_7_0_chr1_201970896_f.3p	6	Mirtron
uc001hps.1_intron_0_0_chr1_226109780_r	26	Mirtron
uc001hrr.2_intron_1_0_chr1_228284964_f	11	Mirtron
uc001hss.2_intron_1_0_chr1_228584749_r	15	Mirtron
uc001ltb.2_intron_37_0_chr11_1277456_f	13	Mirtron
uc001ndw.2_intron_4_0_chr11_47201138_r.3p	6	Mirtron
uc001nsm.2_intron_6_0_chr11_61645688_r	2	Mirtron
uc001ntn.1_intron_2_0_chr11_62334483_r	143.17	Mirtron
uc001nvd.3_intron_3_0_chr11_62557152_f	6	Mirtron
uc001nvf.1_intron_1_0_chr11_62560174_r.3p	167	Mirtron
uc001oad.2_intron_10_0_chr11_64136074_f	3	Mirtron
uc001obw.2_intron_13_0_chr11_64669859_r	21	Mirtron
uc001obw.2_intron_8_0_chr11_64665835_r	5	Mirtron
uc001odb.2_intron_2_0_chr11_64897388_r	6	Mirtron
uc001oey.2_intron_32_0_chr11_65403779_f	9	Mirtron
uc001olv.2_intron_3_0_chr11_67257686_f	25.33	Mirtron
uc001one.2_intron_8_0_chr11_67811812_f.3p	4	Mirtron
uc001oqm.2_intron_6_0_chr11_71184413_f	1	Mirtron
uc001pbp.2_intron_10_0_chr11_85989034_f	22	Mirtron
uc001pwf.2_intron_10_0_chr11_119183660_r.3p	14.5	Mirtron
uc001rra.1_intron_7_0_chr12_48525177_f.3p	37	Mirtron
uc001rsh.3_intron_3_0_chr12_49165757_r	1.5	Mirtron
uc001snd.2_intron_48_0_chr12_57588287_f	385	Mirtron
uc001sof.1_intron_14_0_chr12_57906137_f	20	Mirtron
uc001spv.2_intron_0_0_chr12_58142401_r.3p	11	Mirtron
uc001tst.2_intron_9_0_chr12_112236047_f.3p	2	Mirtron
uc001tuq.3_intron_0_0_chr12_113596918_r.3p	6	Mirtron
uc001uaq.2_intron_8_0_chr12_121882076_r	8	Mirtron
uc001ukf.2_intron_14_0_chr12_133158411_f	9.64	Mirtron
uc001uyj.2_intron_0_0_chr13_42142442_r.3p	3	Mirtron
uc001ygy.1_intron_3_0_chr14_100742986_f.3p	5	Mirtron
uc001yqf.2_intron_14_0_chr14_105617115_r	31	Mirtron
uc002bns.3_intron_14_0_chr15_89869970_r	1	Mirtron
uc002cos.1_intron_0_0_chr16_2140196_r	21	Mirtron
uc002cos.1_intron_28_0_chr16_2156679_r	34.52	Mirtron
uc002cos.1_intron_37_0_chr16_2166120_r	55.5	Mirtron
uc002cqd.1_intron_8_0_chr16_2493802_f.3p	1	Mirtron
uc002cqh.2_intron_7_0_chr16_2512734_f.3p	10	Mirtron
uc002ddj.1_intron_3_0_chr16_15227932_r	34.52	Mirtron
uc002egb.1_intron_3_0_chr16_50325809_f.3p	4	Mirtron
uc002emm.2_intron_16_0_chr16_57806201_r.3p	24	Mirtron
uc002evq.1_intron_10_0_chr16_68267329_r	7	Mirtron
uc002fkm.2_intron_1_0_chr16_87868198_r.3p	21	Mirtron
uc002fux.1_intron_6_0_chr17_2596155_r.3p	23	Mirtron
uc002grp.1_intron_1_0_chr17_17716794_r	86	Mirtron
uc002gta.2_intron_6_0_chr17_18244128_r.3p	3	Mirtron
uc002hba.2_intron_3_0_chr17_26687595_f	4	Mirtron
uc002hqi.3_intron_12_0_chr17_36875837_f	10.5	Mirtron
uc002hra.2_intron_4_0_chr17_37070729_f.3p	25	Mirtron
uc002hsm.2_intron_25_0_chr17_37882107_f.3p	62	Mirtron
uc002hwy.2_intron_6_0_chr17_39673418_r.3p	79	Mirtron
uc002hzr.2_intron_19_0_chr17_40665997_f	13.83	Mirtron
uc002iaz.2_intron_6_0_chr17_40860102_r.3p	3	Mirtron
uc002ibn.2_intron_10_0_chr17_40975898_r	3	Mirtron
uc002igb.2_intron_2_0_chr17_42285139_r	67	Mirtron
uc002iht.2_intron_10_0_chr17_43011986_r	43	Mirtron
uc002iib.2_intron_4_0_chr17_43191735_r.3p	33	Mirtron
uc002jnz.3_intron_28_0_chr17_73494620_f	14	Mirtron
uc002kbg.2_intron_9_0_chr17_79660783_f	25	Mirtron
uc002kea.2_intron_1_0_chr17_80194108_f	18	Mirtron
uc002kos.1_intron_9_0_chr18_10759582_r	19	Mirtron
uc002ldd.2_intron_5_0_chr18_46190923_f.3p	51	Mirtron
uc002lpp.2_intron_6_0_chr19_804940_f	202	Mirtron
uc002lvf.1_intron_1_0_chr19_2234061_r	9	Mirtron
uc002lvf.1_intron_3_0_chr19_2235828_r	1	Mirtron
uc002lvy.2_intron_6_0_chr19_2434912_r	19.5	Mirtron
uc002mbo.2_intron_3_0_chr19_4930889_f.3p	6	Mirtron
uc002meq.2_intron_11_0_chr19_6392915_r	4	Mirtron
uc002mer.3_intron_5_0_chr19_6416419_r	628	Mirtron
uc002mfo.3_intron_16_0_chr19_6736723_r	5	Mirtron
uc002mov.2_intron_7_0_chr19_10662798_f	2	Mirtron
uc002mps.1_intron_17_0_chr19_10935898_f.3p	58.5	Mirtron
uc002mvk.2_intron_9_0_chr19_12963062_f	102	Mirtron
uc002mvu.2_intron_4_0_chr19_13051267_f	92	Mirtron
uc002nan.2_intron_11_0_chr19_15290094_r	2	Mirtron
uc002onm.3_intron_5_0_chr19_40873787_f.3p	18	Mirtron
uc002ort.2_intron_3_0_chr19_42373285_f	21	Mirtron
uc002pem.2_intron_9_0_chr19_46891706_f	10	Mirtron
uc002pls.1_intron_6_0_chr19_49513129_f	17	Mirtron
uc002ppc.1_intron_3_0_chr19_50185323_f	57	Mirtron
uc002ppn.2_intron_3_0_chr19_50285982_f.3p	97	Mirtron
uc002ppw.1_intron_10_0_chr19_50335279_f	11	Mirtron
uc002pqo.2_intron_14_0_chr19_50391092_f	4	Mirtron
uc002qjv.2_intron_11_0_chr19_55751280_r	21	Mirtron
uc002qjv.2_intron_19_0_chr19_55756554_r	9	Mirtron
uc002qjv.2_intron_2_0_chr19_55742253_r.3p	24	Mirtron
uc002qkv.2_intron_3_0_chr19_55899417_f	8	Mirtron
uc002qsc.2_intron_0_0_chr19_58838481_f.3p	26	Mirtron
uc002qtg.1_intron_15_0_chr19_59061652_f	105	Mirtron
uc002quu.2_intron_5_0_chr1_1275030_r	18	Mirtron
uc002vhn.2_intron_5_0_chr2_219206350_f	79	Mirtron
uc002vho.1_intron_9_0_chr2_219144850_r.3p	5	Mirtron
uc002vws.2_intron_3_0_chr2_238419439_f	2	Mirtron
uc002xoh.1_intron_10_0_chr20_44053220_f.3p	24.5	Mirtron
uc002ycq.2_intron_52_0_chr20_60907537_r	8	Mirtron
uc002yia.2_intron_4_0_chr20_62708308_r.3p	2	Mirtron
uc002yzn.1_intron_3_0_chr21_43166932_r.3p	4	Mirtron
uc002zrk.1_intron_5_0_chr22_20102209_r	8	Mirtron
uc003abu.2_intron_0_0_chr22_25844252_f.3p	11.5	Mirtron
uc003agu.3_intron_8_0_chr22_30398983_f.3p	3	Mirtron
uc003alk.2_intron_3_0_chr22_32017459_r	11	Mirtron
uc003apg.2_intron_6_0_chr22_36682893_r.3p	4	Mirtron
uc003aul.2_intron_3_0_chr22_38363178_f	16	Mirtron
uc003bjb.2_intron_4_0_chr22_50356514_f	16	Mirtron
uc003cjc.2_intron_25_0_chr3_39179202_f.3p	1	Mirtron
uc003crt.2_intron_20_0_chr3_47891045_f	130	Mirtron
uc003ctv.2_intron_11_0_chr3_48587394_r	11	Mirtron
uc003cuf.1_intron_19_0_chr3_48671069_r.3p	7	Mirtron
uc003egc.1_intron_15_0_chr3_122880303_f	11.5	Mirtron
uc003ejl.2_intron_1_0_chr3_127294109_r	17	Mirtron
uc003els.2_intron_18_0_chr3_128990753_f	8	Mirtron
uc003fvs.1_intron_8_0_chr3_195609200_r.3p	15.5	Mirtron
uc003lgc.1_intron_8_0_chr5_139943256_r	5	Mirtron
uc003mkp.2_intron_1_0_chr5_179225278_r	259.5	Mirtron
uc003mtz.2_intron_4_0_chr6_2783796_f.3p	65	Mirtron
uc003nbq.2_intron_1_0_chr6_16130979_f.3p	2	Mirtron
uc003nqk.2_intron_12_0_chr6_30552109_f	9312.92	Mirtron
uc003nvb.3_intron_16_0_chr6_31601425_f	9	Mirtron
uc003nvx.1_intron_16_0_chr6_31668806_r	22	Mirtron
uc003nyk.2_intron_7_0_chr6_31924616_r	47.5	Mirtron
uc003oaj.3_intron_2_0_chr6_32147541_f	5	Mirtron
uc003odt.1_intron_2_0_chr6_33258022_f	66	Mirtron
uc003oeo.1_intron_7_0_chr6_33406069_f	8	Mirtron
uc003oit.2_intron_1_0_chr6_34205095_f.3p	8	Mirtron
uc003okp.1_intron_4_0_chr6_35438129_f	10	Mirtron
uc003ouy.1_intron_2_0_chr6_43401099_f.3p	1	Mirtron
uc003slw.2_intron_2_0_chr7_2297150_r	3	Mirtron
uc003tjo.3_intron_1_0_chr7_44089880_f.3p	10	Mirtron
uc003tjt.2_intron_0_0_chr7_44112977_r	4	Mirtron
uc003ttd.2_intron_1_0_chr7_64129557_f.3p	41	Mirtron
uc003xfn.1_intron_14_0_chr8_27289879_f.3p	2	Mirtron
uc003xfx.1_intron_7_0_chr8_27468118_r.3p	20	Mirtron
uc003yre.2_intron_5_0_chr8_125520756_r	6	Mirtron
uc003yzo.1_intron_29_0_chr8_144895132_r	432.33	Mirtron
uc003yzv.2_intron_6_0_chr8_144919928_r.3p	11	Mirtron
uc003zar.3_intron_17_0_chr8_145112224_r	29	Mirtron
uc003zau.2_intron_0_0_chr8_145133803_f.3p	29	Mirtron
uc003zcj.2_intron_29_0_chr8_145625671_r	26	Mirtron
uc003zcj.2_intron_4_0_chr8_145619376_r	10.5	Mirtron
uc003zdz.2_intron_4_0_chr8_146017300_r	2243	Mirtron
uc003zsz.2_intron_14_0_chr9_33467867_r	11	Mirtron
uc003zwz.1_intron_5_0_chr9_35608009_f	11	Mirtron
uc003zxt.2_intron_24_0_chr9_35710681_r	23	Mirtron
uc003zxv.2_intron_0_0_chr9_35732899_f	7	Mirtron
uc004bzr.1_intron_10_0_chr9_133499099_f.3p	5	Mirtron
uc004dsg.2_intron_14_0_chrX_53432605_r	16	Mirtron
uc004fll.3_intron_11_0_chrX_153678668_f	5.33	Mirtron
uc009vjd.2_intron_3_0_chr1_17369_r	7.16	Mirtron
uc009xbu.1_intron_3_0_chr1_206647815_f	12	Mirtron
uc009xwb.2_intron_8_0_chr10_100191049_r.3p	5	Mirtron
uc009yrl.2_intron_5_0_chr11_66812185_f.3p	250	Mirtron
uc010byi.2_intron_9_0_chr16_28734873_f.3p	4.5	Mirtron
uc010ccm.2_intron_23_0_chr16_56936421_f.3p	158	Mirtron
uc010cws.1_intron_3_0_chr17_38318165_f	1	Mirtron
uc010cwu.1_intron_13_0_chr17_38349670_f	2	Mirtron
uc010deh.2_intron_1_0_chr17_62496892_r.3p	23	Mirtron
uc010dgv.1_intron_13_0_chr17_74094100_r.3p	23	Mirtron
uc010dsq.2_intron_0_0_chr19_1816154_r	1	Mirtron
uc010edt.2_intron_10_0_chr19_35836030_f	5	Mirtron
uc010gac.2_intron_3_0_chr20_1373526_r	13	Mirtron
uc010ggf.2_intron_3_0_chr20_39797511_f	16	Mirtron
uc010hlh.1_intron_5_0_chr3_50308912_f.3p	37	Mirtron
uc010juo.1_intron_1_0_chr6_33255004_r	12.38	Mirtron
uc010ksz.1_intron_4_0_chr7_5751471_r.3p	30	Mirtron
uc010lhk.1_intron_1_0_chr7_100465611_f	133	Mirtron
uc010luf.1_intron_24_0_chr8_25200024_f.3p	4	Mirtron
uc010mzz.2_intron_2_0_chr9_135926366_f.3p	13	Mirtron
uc010off.1_intron_6_0_chr1_26880743_f	73	Mirtron
uc010pcd.1_intron_4_0_chr1_150464139_f.3p	4	Mirtron
uc010pkk.1_intron_1_0_chr1_161196395_f.3p	281	Mirtron
uc010pvh.1_intron_3_0_chr1_224585929_r	195	Mirtron
uc010rgq.1_intron_21_0_chr11_46397948_f	2	Mirtron
uc010rpz.1_intron_2_0_chr11_67799804_f.3p	13	Mirtron
uc010ryj.1_intron_1_0_chr11_118514659_f	14	Mirtron
uc010tax.1_intron_8_0_chr12_124821727_r.3p	8	Mirtron
uc010ulk.1_intron_1_0_chr15_74703698_r	2	Mirtron
uc010ulp.1_intron_11_0_chr15_75132983_r.3p	18	Mirtron
uc010vab.1_intron_10_0_chr16_16418385_f	28.85	Mirtron
uc010vuq.1_intron_4_0_chr17_8048312_r.3p	2	Mirtron
uc010wes.1_intron_7_0_chr17_38182585_r	3	Mirtron
uc010xjc.1_intron_8_0_chr19_6389649_r.3p	248	Mirtron
uc010xlk.1_intron_8_0_chr19_11224126_f	57.5	Mirtron
uc010xsl.1_intron_4_0_chr19_35612150_f.3p	1	Mirtron
uc010ybf.1_intron_1_0_chr19_50357801_f	4	Mirtron
uc010zcm.1_intron_14_0_chr2_160042411_f.3p	2	Mirtron
uc010zpy.1_intron_0_0_chr20_2633310_f	1477	Mirtron
uc011aoz.1_intron_4_0_chr22_41648996_r.3p	24	Mirtron
uc011bcd.1_intron_9_0_chr3_49137287_r	45	Mirtron
uc011bra.1_intron_17_0_chr3_183959193_f	1673	Mirtron
uc011dmt.1_intron_3_0_chr6_30857208_f.3p	17.5	Mirtron
uc011dnk.1_intron_1_0_chr6_31323001_r	18	Mirtron
uc011ktd.1_intron_2_0_chr7_143079779_f	104	Mirtron
uc011llg.1_intron_8_0_chr8_145660934_r	5	Mirtron
uc011mex.1_intron_2_0_chr9_140344478_r	5	Mirtron
uc011moc.1_intron_11_0_chrX_53228071_r	30.5	Mirtron
uc011moc.1_intron_6_0_chrX_53224593_r.3p	7	Mirtron

## Sheet: Mouse_Detail
Locus	Type	Total_Reads	Fivep_Reads	Threep_Reads	GSM317183 5p + 3p	GSM317184 5p + 3p	Ago_sum 5p + 3p		Library	Total reads	Clipped pass	Mapped reads	miRNA reads perfect	mirtron reads perfect	miRNA reads untemplated	mirtron reads untemplated
mmu-mir-9-1	miRNA	2.12834e+06	1.97181e+06	154992	3202	558.833	3760.83		GSM317183	78964	66483	57243	19857	11	18069	45
mmu-mir-9-2	miRNA	2.12821e+06	1.97181e+06	154990	3200	558.833	3758.83		GSM317184	69318	66104	62835	4275	4	6657	9
mmu-mir-9-3	miRNA	2.12934e+06	1.97332e+06	154762	3169.5	545.333	3714.83
mmu-mir-20a	miRNA	3.78592e+06	3.75841e+06	20681	1278	165	1443
mmu-mir-25	miRNA	3719522	129631	3589633	790	471	1261
mmu-mir-16-1	miRNA	4.25869e+06	4.12199e+06	17157.2	982	224.333	1206.33
mmu-mir-16-2	miRNA	4.20678e+06	4.07626e+06	12876.5	975	227.333	1202.33
mmu-mir-92a-1	miRNA	4.16212e+06	43060	4118526	759	301	1060
mmu-mir-199a-2	miRNA	1.58526e+06	188943	1.39455e+06	940	104.333	1044.33
mmu-mir-15b	miRNA	1.58304e+06	1.54299e+06	36634.8	656.333	384.5	1040.83
mmu-mir-199a-1	miRNA	1.5823e+06	188776	1.39204e+06	934.5	103.333	1037.83
mmu-mir-199b	miRNA	1.45637e+06	63527.5	1.39204e+06	917.5	99.3333	1016.83
mmu-mir-93	miRNA	2.0515e+06	2.03039e+06	18861	913	69	982
mmu-mir-27b	miRNA	2.01491e+06	46745	1.96767e+06	762.333	105.333	867.667
mmu-mir-26b	miRNA	2.07801e+06	2.07507e+06	2251	527	221	748
mmu-mir-335	miRNA	709946	473100	235142	603	71	674
mmu-mir-17	miRNA	4.62234e+06	4.38178e+06	237574	542.5	102	644.5
mmu-mir-106b	miRNA	1.53446e+06	1.48824e+06	45503	603	31	634
mmu-mir-23b	miRNA	951156	21268.7	925364	358.5	261.5	620
mmu-mir-23a	miRNA	1.2592e+06	6334.5	1.2512e+06	358.5	176.5	535
mmu-mir-26a-2	miRNA	2.97629e+06	2.9732e+06	1798	313.5	187.5	501
mmu-mir-26a-1	miRNA	2.97403e+06	2.97226e+06	513	310.5	186.5	497
mmu-mir-92b	miRNA	135742	12386.5	123344	334	163	497
mmu-mir-200b	miRNA	896357	38610.2	857613	245	249	494
mmu-mir-125a	miRNA	823405	798017	24537	363	83	446
mmu-mir-92a-2	miRNA	1.57304e+06	17241	1555746	226	121	347
mmu-mir-151	miRNA	537959	364219	173621	301.5	39.5	341
mmu-mir-342	miRNA	429172	41780	384452	297	36	333
mmu-mir-7a-1	miRNA	1.45111e+06	1.36686e+06	26087.5	223.833	88.8333	312.667
mmu-mir-322	miRNA	1.69178e+06	1.40362e+06	285600	256	50	306
mmu-mir-99b	miRNA	842509	819707	22249	257	38	295
mmu-mir-200c	miRNA	720764	852	719668	138	150	288
mmu-mir-126	miRNA	1507620	285693	1221080	202	72	274
mmu-mir-135a-2	miRNA	95108	83790.5	7386.33	221.5	37.5	259
mmu-mir-218-2	miRNA	335930	331008	3049.5	118	130	248
mmu-mir-218-1	miRNA	303194	297543	4749	108	121	229
mmu-mir-135a-1	miRNA	99164	90626.5	4658	187	40.5	227.5
mmu-mir-374	miRNA	226460	219061	7233.33	133	91	224
mmu-mir-125b-1	miRNA	1.41685e+06	1.36427e+06	52286	192.833	30.5	223.333
mmu-mir-652	miRNA	620984	1341	619303	192	28	220
mmu-mir-30e	miRNA	3.07682e+06	2.5691e+06	492731	170	42	212
mmu-mir-125b-2	miRNA	1.40042e+06	1.3556e+06	44499	179.833	26.5	206.333
mmu-mir-7a-2	miRNA	1.39381e+06	1.3353e+06	5370.5	118.833	74.8333	193.667
mmu-mir-495	miRNA	88893.5	2387	86386.5	138	51	189
mmu-mir-30c-2	miRNA	933214	877268	55140	136.333	51	187.333
mmu-mir-30c-1	miRNA	903129	877230	25098	136.333	50	186.333
mmu-mir-369	miRNA	452977	86576	365977	137.5	35	172.5
mmu-mir-30a	miRNA	2957870	2604601	348336	150	21	171
mmu-mir-183	miRNA	1.06668e+06	1.03749e+06	25268	105.5	58.5	164
mmu-mir-153	miRNA	185820	7126	174932	107	50	157
mmu-mir-361	miRNA	208412	195852	12385	118	39	157
mmu-mir-191	miRNA	5.36057e+06	5.34656e+06	11055	133.5	17	150.5
mmu-mir-429	miRNA	118175	199	117758	81	65	146
mmu-mir-410	miRNA	197055	4352.5	192501	122	15	137
mmu-mir-434	miRNA	889976	241287	648408	115	20	135
mmu-mir-18a	miRNA	1.06979e+06	1.02869e+06	39648	104	23	127
mmu-mir-27a	miRNA	1.04069e+06	17984.3	1.02178e+06	111.333	10.3333	121.667
mmu-mir-433	miRNA	245686	11084	234393	76	37	113
mmu-mir-204	miRNA	74684.2	71459.3	2688.67	85	27	112
mmu-mir-99a	miRNA	1215103	1205498	8904	104	8	112
mmu-let-7d	miRNA	8.84569e+06	8804721	40152	68	38	106
mmu-mir-340	miRNA	700661	690605	9720.25	87	12	99
mmu-mir-30d	miRNA	2.48428e+06	2468247	11857	76	20	96
mmu-mir-329	miRNA	46911.5	20999.3	25616.5	64	31	95
mmu-mir-351	miRNA	221223	211305	9303	62	33	95
mmu-mir-484	Noncanonical	214210	213798	125	86	9	95
mmu-mir-15a	miRNA	1.13337e+06	1.10384e+06	4296.5	69	24	93
mmu-mir-135b	miRNA	208771	194378	9552	73	18	91
mmu-mir-21	miRNA	2.17904e+07	2.16221e+07	139958	75	16	91
mmu-mir-350	miRNA	75540.2	9498	65975	83	8	91
mmu-mir-323	miRNA	61706	3154	58479	59	30	89
mmu-mir-411	miRNA	1343781	1164915	178626	53	34	87
mmu-mir-667	miRNA	29355	4327	24974	62	24	86
mmu-mir-1983	miRNA	194422	2380.5	182653	72	13	85
mmu-mir-128-1	miRNA	1043088	935	1041979	60.5	22.5	83
mmu-mir-382	miRNA	343729	283354	60131	52	31	83
mmu-mir-379	miRNA	1548852	1.49484e+06	53995.7	41	40	81
mmu-mir-206	miRNA	604055	8	603903	22	58	80
mmu-mir-384	miRNA	81599	53174	28387.8	61	19	80
mmu-mir-30b	miRNA	498871	472864	25827	65.3333	10	75.3333
mmu-mir-487b	miRNA	98795.3	307.5	98377	64	10	74
mmu-mir-483	miRNA	57190.4	30989.5	26102.4	44.3333	29	73.3333
mmu-let-7c-1	miRNA	1.63205e+07	1.63174e+07	1126	40	32	72
mmu-mir-140	miRNA	9.08918e+06	380647	8.70778e+06	40	28	68
mmu-mir-24-1	miRNA	3.24191e+06	7817	3.23328e+06	46	21.5	67.5
mmu-mir-24-2	miRNA	3.29583e+06	61722	3.23328e+06	46	21.5	67.5
mmu-let-7c-2	miRNA	1.64412e+07	1.64315e+07	8087	37.5	26	63.5
mmu-mir-362	miRNA	105482	74962	30407.5	53	10	63
mmu-mir-674	miRNA	226644	198599	26832.9	37	24	61
mmu-mir-205	miRNA	119599	115724	2179	52	8	60
mmu-mir-325	miRNA	5017.07	1207.73	3808.33	50.5	8.5	59
mmu-mir-100	miRNA	373407	370208	3034.83	46	11	57
mmu-mir-181b-2	miRNA	695175	692449	963.5	30	26	56
mmu-mir-543	miRNA	62794	8451	54285	38	18	56
mmu-mir-181b-1	miRNA	570340	561358	8043.9	29	25	54
mmu-mir-182	miRNA	2.44231e+06	2.43288e+06	1680.5	41	13	54
mmu-mir-485	miRNA	76947	40885.5	35296	19	35	54
mmu-mir-181a-2	miRNA	2.06599e+06	2047420	13983	43.5	10	53.5
mmu-mir-103-2	miRNA	5.22963e+06	2420	5.21766e+06	34.3333	16.8333	51.1667
mmu-mir-376b	miRNA	443773	88229.5	355182	40	10	50
mmu-mir-598	miRNA	105225	65	105138	46	4	50
mmu-mir-148a	miRNA	2.16735e+06	16209	2150886	25	24	49
mmu-let-7a-2	miRNA	1.42816e+07	1.42784e+07	399	18.5	30	48.5
mmu-mir-10a	miRNA	936257	914942	20112	44	4	48
mmu-mir-532	miRNA	203530	173493	29812.2	34.5	13	47.5
mmu-mir-103-1	miRNA	5.13149e+06	432	5.12156e+06	31.3333	15.8333	47.1667
mmu-let-7a-1	miRNA	1.43497e+07	1.43378e+07	8083	20	27	47
mmu-mir-128-2	miRNA	596410	2429	593926	35.5	11.5	47
mmu-mir-541	miRNA	1376921	1.36134e+06	10238	28	18	46
mmu-mir-501	miRNA	81415.8	16333.8	64908	37	8	45
mmu-mir-425	miRNA	501345	470598	22215	31	12	43
mmu-mir-101b	miRNA	2.76519e+06	478	2.76397e+06	36.5	5.5	42
mmu-mir-676	miRNA	82802.8	11110	71677.3	34	8	42
mmu-mir-203	miRNA	307878	3630	304064	22	19	41
mmu-mir-137	miRNA	607909	3537.33	603590	37	3	40
mmu-let-7b	miRNA	1.29601e+07	1.29525e+07	5401	17	22	39
mmu-let-7g	miRNA	1.03985e+07	1.03919e+07	5615	20	18	38
mmu-mir-139	miRNA	339821	274846	63679	34	4	38
mmu-mir-107	miRNA	1.5749e+06	3037	1567945	23.3333	14.3333	37.6667
mmu-mir-421	miRNA	75767.1	349	75304.8	28	9	37
mmu-mir-669c	miRNA	319433	319174	15.51	21	15	36
mmu-mir-299	miRNA	123004	44641.7	78218	26	9	35
mmu-let-7e	miRNA	2.60781e+06	2.59968e+06	6800	21	13	34
mmu-mir-320	Noncanonical	2.34385e+06	92.83	2.34193e+06	23	9.5	32.5
mmu-mir-130b	miRNA	890749	29688.5	860984	24	7	31
mmu-mir-195	miRNA	239219	238271	629	18	13	31
mmu-mir-496	miRNA	40921.2	206	40656.2	21	10	31
mmu-mir-134	miRNA	417064	415114	1448	13	17	30
mmu-mir-1839	miRNA	1.40387e+06	1.3881e+06	15496	27	3	30
mmu-mir-328	miRNA	94621.2	1981.5	91666.2	28	2	30
mmu-mir-28	miRNA	521028	385362	135378	20	9	29
mmu-mir-22	miRNA	6.05237e+06	73521	5.9786e+06	20	7	27
mmu-mir-301a	miRNA	396489	7604	386208	18	9	27
mmu-mir-872	miRNA	337358	289054	48222	23	3	26
mmu-mir-10b	miRNA	419308	403345	15320	21	4	25
mmu-mir-423	miRNA	2.45476e+06	2.16598e+06	287960	20	5	25
mmu-mir-672	miRNA	447549	444973	2257.83	18	7	25
mmu-let-7f-1	miRNA	2.74545e+07	2.74477e+07	2697.5	14.5	9.5	24
mmu-mir-19b-1	miRNA	864493	24288	838898	22	2	24
mmu-mir-19b-2	miRNA	855897	1632	852935	22	2	24
mmu-mir-324	miRNA	199286	144173	54376.7	19	5	24
mmu-mir-494	miRNA	88911	1099	87350	10	14	24
mmu-mir-450a-1	miRNA	52221	48960.5	3106.48	20.5	3	23.5
mmu-mir-450a-2	miRNA	51513.5	48875.5	2636	20.5	3	23.5
mmu-mir-1249	miRNA	13849	307.5	13510.5	18	5	23
mmu-mir-181d	miRNA	469416	467808	1246	12	11	23
mmu-mir-186	miRNA	899572	888297	6606	21	2	23
mmu-mir-200a	miRNA	450674	4568	445900	16	7	23
mmu-mir-224	miRNA	58388	56068	2018	9	12	21
mmu-mir-181a-1	miRNA	2114303	2047510	62297	13.5	7	20.5
mmu-let-7f-2	miRNA	3.08352e+07	3.08278e+07	2445	9.5	10.5	20
mmu-mir-124-1	miRNA	671899	2279.33	668324	15.6667	3.66667	19.3333
mmu-mir-124-2	miRNA	672046	2270.33	668297	15.6667	3.66667	19.3333
mmu-mir-124-3	miRNA	671836	2267.33	668299	15.6667	3.66667	19.3333
mmu-mir-451	miRNA	2406552	2.36558e+06	14	7	12	19
mmu-mir-1306	miRNA	21073.7	12808.7	8043	16	2	18
mmu-mir-145	miRNA	657394	612121	40332	16	2	18
mmu-mir-376c	miRNA	195615	1480.5	194054	17	0	17
mmu-mir-488	miRNA	27494.6	314	27179.1	15.6667	1	16.6667
mmu-mir-106a	miRNA	351800	351188	485.67	15.5	1	16.5
mmu-mir-1251	miRNA	3954	3879	69	16	0	16
mmu-mir-132	miRNA	484844	27678	456840	12	4	16
mmu-mir-3099	miRNA	12736.8	18.5	12717.3	13	3	16
mmu-mir-455	miRNA	56203.4	19734.4	36346.5	12	4	16
mmu-mir-503	miRNA	492323	470061	11976	7	9	16
mmu-mir-3107	miRNA	97616	96050.5	1555	9.5	6	15.5
mmu-mir-486	miRNA	120020	95287.5	24494	9.5	6	15.5
mmu-mir-101a	miRNA	1.39625e+06	11929	1.38293e+06	13	2	15
mmu-mir-219-2	miRNA	156104	35820.5	119548	12	3	15
mmu-mir-669o	miRNA	29117.9	21793	7300.67	11.1697	3	14.1697
uc009abj.1_intron_12_0_chr5_137467312_f	mirtron	3733	773	2909	12	2	14
mmu-let-7i	miRNA	8.50902e+06	8485360	18974	11	3	14
mmu-mir-148b	miRNA	550062	21398	528580	11	3	14
mmu-mir-185	miRNA	1.06832e+06	1.06317e+06	4774.33	9	5	14
mmu-mir-409	miRNA	187444	37867	148982	7	7	14
mmu-mir-149	miRNA	95399.9	92738.5	892.39	11	2	13
mmu-mir-615	miRNA	31746.3	750	30860	8	5	13
mmu-mir-190	miRNA	55289	54432.5	748	10.6667	2	12.6667
mmu-mir-130a	miRNA	2.00637e+06	2440.5	2.00307e+06	8	4	12
mmu-mir-20b	miRNA	510485	495057	15188	10	2	12
mmu-mir-375	miRNA	1850550	1515	1848966	6	6	12
mmu-mir-412	miRNA	13366.7	9360	3882	3	9	12
mmu-mir-708	miRNA	487313	452344	27024.2	11	1	12
mmu-mir-152	miRNA	1.25358e+06	1954.5	1.25154e+06	8	3	11
mmu-mir-380	miRNA	155774	62205	93523	11	0	11
mmu-mir-214	miRNA	308082	34022.5	272142	5	5	10
mmu-mir-1198	miRNA	25450.9	24334.5	1086.2	6	3	9
mmu-mir-330	miRNA	112845	45992.5	66729	5	4	9
mmu-mir-370	miRNA	81328.6	11950	69320	8	1	9
mmu-mir-377	miRNA	116262	3513	112688	3	6	9
mmu-mir-744	miRNA	769754	767129	2553.5	8	1	9
mmu-mir-296	miRNA	233028	49832.5	183092	6.5	2	8.5
mmu-mir-129-2	miRNA	187993	82686	104861	8	0	8
mmu-mir-136	miRNA	866461	687706	177190	7	1	8
mmu-mir-194-2	miRNA	653127	648575	4358	3	5	8
mmu-mir-212	miRNA	65705.7	23396.2	42237.5	4	4	8
mmu-mir-221	miRNA	1.99063e+06	76943	1.90719e+06	8	0	8
mmu-mir-222	miRNA	1.48896e+06	9313.2	1476265	6	2	8
mmu-mir-664	miRNA	47115.5	34097	12587	7	1	8
mmu-mir-760	miRNA	8367.83	229.5	8060.33	7	1	8
uc008cjk.1_intron_10_0_chr17_36097675_r	Mirtron	30633.4	27207	3317.89	7.5	0	7.5
mmu-mir-574	miRNA	13230	353.6	12871.8	1.1	6.2	7.3
mmu-mir-365-1	miRNA	27023.5	1457	25560	2.5	4	6.5
mmu-mir-141	miRNA	183760	4398	178488	4	2.33333	6.33333
mmu-mir-154	miRNA	225424	108658	116702	6	0	6
mmu-mir-34b	miRNA	377926	341648	34475.2	4	2	6
mmu-mir-34c	miRNA	1.71105e+06	1.69402e+06	13569	6	0	6
mmu-mir-467e	miRNA	138288	137449	822.23	3	3	6
mmu-mir-7b	miRNA	87535.5	76683.6	725	4	2	6
mmu-mir-365-2	miRNA	35416.8	9624	25560	1.5	4	5.5
mmu-mir-669m-1	miRNA	14989.7	14284.8	452.52	2.83333	2.5	5.33333
mmu-mir-669m-2	miRNA	15001	14284.8	456.52	2.83333	2.5	5.33333
mmu-mir-669a-1	miRNA	15334.5	7995.19	7300.67	2.75722	2.50417	5.26139
mmu-mir-669a-10	miRNA	15325.8	7995.19	7300.67	2.75722	2.50417	5.26139
mmu-mir-669a-11	miRNA	15325.8	7995.19	7300.67	2.75722	2.50417	5.26139
mmu-mir-669a-12	miRNA	15325.8	7995.19	7300.67	2.75722	2.50417	5.26139
mmu-mir-669a-2	miRNA	15335.6	7995.19	7300.67	2.75722	2.50417	5.26139
mmu-mir-669a-4	miRNA	15325.8	7995.19	7300.67	2.75722	2.50417	5.26139
mmu-mir-669a-5	miRNA	15325.8	7995.19	7300.67	2.75722	2.50417	5.26139
mmu-mir-669a-6	miRNA	15325.8	7995.19	7300.67	2.75722	2.50417	5.26139
mmu-mir-669a-7	miRNA	15325.8	7995.19	7300.67	2.75722	2.50417	5.26139
mmu-mir-669a-8	miRNA	15325.8	7995.19	7300.67	2.75722	2.50417	5.26139
mmu-mir-669a-9	miRNA	15325.8	7995.19	7300.67	2.75722	2.50417	5.26139
mmu-mir-669a-3	miRNA	10527.9	7995.19	2496.25	2.60337	2.50417	5.10754
mmu-mir-669p-1	miRNA	8466.57	7995.19	445.31	2.60337	2.50417	5.10754
mmu-mir-669p-2	miRNA	8466.57	7995.19	445.31	2.60337	2.50417	5.10754
mmu-mir-127	miRNA	3.15263e+06	225906	2925704	2	3	5
mmu-mir-150	miRNA	364185	257427	106729	4	1	5
mmu-mir-194-1	miRNA	444790	440998	3026	3	2	5
mmu-mir-223	miRNA	634867	21971	610745	4	1	5
mmu-mir-300	miRNA	509925	34054.2	472564	5	0	5
mmu-mir-302d	miRNA	46285.7	1028	45243	4	1	5
mmu-mir-431	miRNA	229076	200320	28600	3	2	5
mmu-mir-499	miRNA	381564	376859	4494	1	4	5
mmu-mir-671	miRNA	66592.5	61740	4519.5	4	1	5
mmu-mir-669l	miRNA	28136.2	27461.6	394.69	2.83333	2	4.83333
mmu-mir-673	miRNA	61084.6	57305.5	2548	1	3.5	4.5
mmu-mir-669b	miRNA	14471	14281.3	176.42	2.33333	2	4.33333
mmu-mir-466d	miRNA	43223.8	4087.59	38947.6	1.68992	2.38095	4.07087
mmu-mir-668	3p	20781.5	414	20288	3	1	4
uc007dyq.1_intron_2_0_chr1_186646286_r	Mirtron	168320	164121	4073.5	3	1	4
mmu-mir-1193	miRNA	12029	2941	8951	2	2	4
mmu-mir-19a	miRNA	835542	6479	823812	4	0	4
mmu-mir-337	miRNA	127986	97473	30343.5	4	0	4
mmu-mir-345	miRNA	199280	95015	104054	3	1	4
mmu-mir-449a	miRNA	99193.7	98358	270	1	3	4
mmu-mir-467c	miRNA	115657	115189	7.88	2	2	4
mmu-mir-96	miRNA	595401	575714	1243	4	0	4
mmu-mir-98	miRNA	310755	308314	2152.5	2	2	4
mmu-mir-378	miRNA	5.57337e+06	20666.6	5.5525e+06	3.25	0.5	3.75
mmu-mir-211	miRNA	2300.14	1844.81	403	3	0.5	3.5
mmu-mir-339	miRNA	100970	85834.3	15019.8	3.5	0	3.5
mmu-mir-669d	miRNA	8518.57	8302.59	166.11	2.66667	0.5	3.16667
mmu-mir-669d-2	miRNA	8510.58	8326.56	166.11	2.66667	0.5	3.16667
uc009jvr.1_intron_6_0_chr7_134632765_f	mirtron	164	114	40	3	0	3
uc009inu.1_intron_12_0_chr7_108030820_r	mirtron	14435.2	2501.18	10431	3	0	3
mmu-mir-155	miRNA	249838	246227	2178.5	2	1	3
mmu-mir-192	miRNA	1.0453e+07	1.04489e+07	2393	3	0	3
mmu-mir-219-1	miRNA	26716.5	17625.5	8877	2	1	3
mmu-mir-29c	miRNA	482448	12589.2	469345	1	2	3
mmu-mir-3060	miRNA	2125.89	21	2098	3	0	3
mmu-mir-3078	miRNA	381.5	265	106	3	0	3
mmu-mir-33	miRNA	253771	246206	7240	3	0	3
mmu-mir-331	miRNA	82217	5625	75370	3	0	3
mmu-mir-34a	miRNA	444517	433728	5483	2	1	3
mmu-mir-383	miRNA	134174	133635	370.5	3	0	3
mmu-mir-582	miRNA	29536.3	21929.3	7567	1	2	3
mmu-mir-665	miRNA	98628.6	660	97539.6	2	1	3
mmu-mir-670	miRNA	2769	962	1779	2	1	3
mmu-mir-466c-1	miRNA	25175.8	10471.8	14636.7	1.75837	0.519643	2.27802
mmu-mir-466c-2	miRNA	25175.8	10471.8	14636.7	1.75837	0.519643	2.27802
uc008vku.1_intron_2_0_chr4_137872047_r.3p	5p tailed mirtron	137.5	43.5	90	2	0	2
uc007lzp.1_intron_1_0_chr11_106644008_r.3p	5p tailed mirtron	1594.5	1411.5	153	1	1	2
mmu-mir-122	miRNA	2.53317e+07	2.52746e+07	53410	0	2	2
mmu-mir-129-1	miRNA	94857.5	82672	11988.5	2	0	2
mmu-mir-138-2	miRNA	443513	438402	4695	2	0	2
mmu-mir-142	miRNA	3.70949e+06	2.57818e+06	1.12812e+06	2	0	2
mmu-mir-143	miRNA	5.26073e+06	40913.5	5.20877e+06	1	1	2
mmu-mir-181c	miRNA	325050	270867	52329	2	0	2
mmu-mir-187	miRNA	103277	5827	97339	2	0	2
mmu-mir-1a-1	miRNA	9.91737e+06	266	9.91694e+06	0	2	2
mmu-mir-1a-2	miRNA	9.91754e+06	350	9.91703e+06	0	2	2
mmu-mir-210	miRNA	267220	1936	265152	2	0	2
mmu-mir-216b	miRNA	69359.7	69051.8	297.5	0	2	2
mmu-mir-298	miRNA	477155	462297	2064	2	0	2
mmu-mir-301b	miRNA	59044.5	470.5	58158	2	0	2
mmu-mir-302b	miRNA	134436	219	134184	1	1	2
mmu-mir-3057	miRNA	2680	2508	161	2	0	2
mmu-mir-3068	miRNA	85764.8	70736.5	14636	0	2	2
mmu-mir-32	miRNA	204431	198102	5667.5	1	1	2
mmu-mir-326	miRNA	40294.9	824	39305.7	2	0	2
mmu-mir-344c	miRNA	5585.83	48	5509.33	2	0	2
mmu-mir-363	miRNA	210325	89663	120232	2	0	2
mmu-mir-466n	miRNA	19465.9	4087.59	15233	2	0	2
mmu-mir-5126	miRNA	3547.39	0	3544.19	0	2	2
mmu-mir-551b	miRNA	29640	134	29490.5	2	0	2
mmu-mir-679	miRNA	7712	5467	2218.67	1	1	2
mmu-mir-3084	miRNA	2231.23	1340	784.23	1	0.5	1.5
mmu-mir-344-1	miRNA	73994.5	19	73823.5	0.5	1	1.5
mmu-mir-344-2	miRNA	73994.5	19	73823.5	0.5	1	1.5
mmu-mir-669f	miRNA	12666.4	8027.9	4319.84	1	0.5	1.5
mmu-mir-466b-1	miRNA	16580.5	1880.05	14636.7	0.841708	0.540919	1.38263
mmu-mir-466b-2	miRNA	16451.8	1751.48	14636.7	0.841708	0.540919	1.38263
mmu-mir-466b-4	miRNA	16581	1880.05	14636.7	0.841708	0.540919	1.38263
mmu-mir-466b-5	miRNA	16581	1880.05	14636.7	0.841708	0.540919	1.38263
mmu-mir-466b-6	miRNA	16581	1880.05	14636.7	0.841708	0.540919	1.38263
mmu-mir-466b-7	miRNA	16581	1880.05	14636.7	0.841708	0.540919	1.38263
mmu-mir-466b-8	miRNA	17095.3	2391.9	14636.7	0.841708	0.519643	1.36135
mmu-mir-466e	miRNA	17095.3	2391.9	14636.7	0.841708	0.519643	1.36135
mmu-mir-133a-1	miRNA	183222	10271.9	172835	1.33333	0	1.33333
mmu-mir-133a-2	miRNA	183248	10191.9	172835	1.33333	0	1.33333
mmu-mir-133b	miRNA	82662.9	850	81797.3	1.33333	0	1.33333
mmu-mir-466p	miRNA	15865.7	1179.93	14611.5	0.758375	0.540919	1.29929
mmu-mir-466a	miRNA	16315.2	1630.22	14634.6	0.758375	0.519643	1.27802
mmu-mir-467d	miRNA	85779.3	82075	3657.67	0	1.15385	1.15385
uc009jqy.1_intron_9_0_chr7_133518718_r.3p	5p tailed mirtron candidate	40.5	19	20.5	0	1	1
uc009fyn.1_intron_12_0_chr7_29153745_r	5p tailed mirtron candidate	41.5	6	30.5	1	0	1
uc009rty.1_intron_10_0_chr9_110292693_r	5p tailed mirtron candidate	74	35	38	1	0	1
uc009fru.1_intron_2_0_chr7_26002687_r.3p	5p tailed mirtron	138	35	96	0	1	1
uc009kww.1_intron_11_0_chr8_13135970_f	5p tailed mirtron	149	20.5	123.83	1	0	1
uc009mca.1_intron_0_0_chr8_73419407_r	5p tailed mirtron	171	32	136	1	0	1
uc009mga.1_intron_13_0_chr8_74993915_r	mirtron	344.333	166	165	1	0	1
uc009ugo.1_intron_1_0_chrX_131291882_f	5p tailed mirtron	369.758	40	205	1	0	1
uc009kls.1_intron_11_0_chr7_148806469_f	5p tailed mirtron	380.333	298.33	79	1	0	1
uc008xdg.1_intron_5_0_chr5_35363056_f.3p	5p tailed mirtron	556	297	259	1	0	1
uc008jpc.1_intron_7_0_chr2_44878625_r.3p	5p tailed mirtron	561	421	139	1	0	1
uc009evl.1_intron_10_0_chr7_3607555_f	5p tailed mirtron	800.167	496.83	209	0	1	1
mmu-mir-1247	miRNA	8941	7825	1111	1	0	1
mmu-mir-1298	miRNA	43346.5	31289	12042.5	1	0	1
mmu-mir-1843	miRNA	44524.8	36619	7834	0	1	1
mmu-mir-18b	miRNA	25469.5	24094	1296	1	0	1
mmu-mir-190b	miRNA	3803.4	3337.4	464	1	0	1
mmu-mir-1930	miRNA	1106	1084	21	0	1	1
mmu-mir-1964	miRNA	13284	2671	10602	1	0	1
mmu-mir-1969	miRNA	918	877	7	1	0	1
mmu-mir-28c	miRNA	1467.67	1	1465.67	1	0	1
mmu-mir-29a	miRNA	8.04209e+06	33154.7	8006853	1	0	1
mmu-mir-302a	miRNA	67689.3	16602	51017	0	1	1
mmu-mir-3095	miRNA	14062.5	520	13482	0	1	1
mmu-mir-31	miRNA	856925	846271	9555	1	0	1
mmu-mir-338	miRNA	152565	41119.5	107448	1	0	1
mmu-mir-346	miRNA	3851	3815	34	1	0	1
mmu-mir-3473d	miRNA	1499.63	1425.72	69.69	1	0	1
mmu-mir-3475	miRNA	8152	10	8141	1	0	1
mmu-mir-374c	miRNA	4419.18	431.51	3987.67	0	1	1
mmu-mir-381	miRNA	605189	3342	600995	0	1	1
mmu-mir-450b	miRNA	28584.9	11342	17204	1	0	1
mmu-mir-452	miRNA	7474	6798	639	1	0	1
mmu-mir-491	miRNA	5698	5137	555	0	1	1
mmu-mir-493	miRNA	13941.5	10592.5	3336	0	1	1
mmu-mir-500	miRNA	107854	2501.5	105105	0	1	1
mmu-mir-505	miRNA	15425.1	9886	5157.25	1	0	1
mmu-mir-511	miRNA	15186.8	220	14962.8	0	1	1
mmu-mir-540	miRNA	92095.1	9701.5	82342.3	1	0	1
mmu-mir-542	miRNA	98644.7	13107.7	85336.3	1	0	1
mmu-mir-666	miRNA	30357.9	20818.9	9272	1	0	1
mmu-mir-701	miRNA	1860	1611	249	0	1	1
mmu-mir-466b-3	miRNA	11059.6	1880.05	9139.99	0.627422	0.350443	0.977866
mmu-mir-467a-1	miRNA	20819.4	17094.2	3657.67	0.416667	0.403846	0.820513
mmu-mir-467a-10	miRNA	20819.4	17094.2	3657.67	0.416667	0.403846	0.820513
mmu-mir-467a-2	miRNA	20819.4	17094.2	3657.67	0.416667	0.403846	0.820513
mmu-mir-467a-3	miRNA	20819.4	17094.2	3657.67	0.416667	0.403846	0.820513
mmu-mir-467a-4	miRNA	20819.4	17094.2	3657.67	0.416667	0.403846	0.820513
mmu-mir-467a-5	miRNA	20819.4	17094.2	3657.67	0.416667	0.403846	0.820513
mmu-mir-467a-6	miRNA	20819.4	17094.2	3657.67	0.416667	0.403846	0.820513
mmu-mir-467a-7	miRNA	20819.4	17094.2	3657.67	0.416667	0.403846	0.820513
mmu-mir-467a-8	miRNA	20819.4	17094.2	3657.67	0.416667	0.403846	0.820513
mmu-mir-467a-9	miRNA	20819.4	17094.2	3657.67	0.416667	0.403846	0.820513
mmu-mir-467b	miRNA	17216.3	17094.2	55.45	0.416667	0.25	0.666667
mmu-mir-146b	miRNA	316929	314787	1415.5	0.333333	0.333333	0.666667
mmu-mir-297a-3	miRNA	4103.68	1336.97	2526.89	0.525	0	0.525
mmu-mir-297a-4	miRNA	4105.89	1336.97	2526.89	0.525	0	0.525
mmu-mir-297b	miRNA	4526.25	1980.7	2526.89	0.525	0	0.525
mmu-mir-297c	miRNA	4531.86	1987.4	2524.75	0.525	0	0.525
mmu-mir-1b	miRNA	1690.5	149.5	1498	0	0.5	0.5
mmu-mir-5105	miRNA	251646	133879	38869.7	0	0.5	0.5
mmu-mir-344d-1	miRNA	3395.8	45	3348.6	0.4	0	0.4
mmu-mir-344d-2	miRNA	3359.13	13	3343.93	0.4	0	0.4
mmu-mir-344d-3	miRNA	4015.13	668	3343.93	0.4	0	0.4
mmu-mir-669g	miRNA	52.4429	28.83	0.1	0.4	0	0.4
mmu-mir-448	miRNA	8114.33	2253.5	5303.33	0	0.333333	0.333333
mmu-mir-1191	miRNA	950.296	261.33	556.4	0.222222	0	0.222222
mmu-mir-466g	miRNA	1817.45	254.28	1545.25	0	0.136364	0.136364
mmu-mir-466o	miRNA	2491.11	1880.05	601.74	0.0833333	0.0212766	0.10461
mmu-mir-690	miRNA	144.401	54.74	20.24	0.01	0.03	0.04
mmu-mir-466f-3	miRNA	2580.79	1733.27	599.93	0	0.0333333	0.0333333
mmu-mir-466k	miRNA	359.046	317.75	8.83	0	0.0212766	0.0212766
mmu-mir-466f-2	miRNA	2089.85	1733.27	101.64	0.015873	0	0.015873
mmu-mir-1196	miRNA	55.0232	51.47	0.01	0.01	0	0.01
uc008zos.1_intron_26_0_chr5_124451102_f	5p tailed mirtron candidate	25	1	23	0	0	0
uc009gao.1_intron_71_0_chr7_29868654_r.3p	5p tailed mirtron	26	22	3	0	0	0
uc009mgj.1_intron_7_0_chr8_75198424_f.3p	5p tailed mirtron candidate	27	6	21	0	0	0
uc008wwz.1_intron_29_0_chr5_31375647_f	5p tailed mirtron candidate	31	6	23	0	0	0
uc009ewc.1_intron_4_0_chr7_3665887_r	5p tailed mirtron candidate	31	3	25	0	0	0
uc008wvj.1_intron_8_0_chr5_30658029_f.3p	5p tailed mirtron candidate	32.5	26	5	0	0	0
uc008wai.1_intron_15_0_chr4_151744752_f	3p tailed mirtron candidate	33	28	5	0	0	0
uc009fie.1_intron_16_0_chr7_17425322_f	5p tailed mirtron candidate	35	25	6	0	0	0
uc008wwz.1_intron_19_0_chr5_31370961_f	mirtron candidate	35	7	27	0	0	0
uc009nlb.1_intron_19_0_chr8_113362250_r.3p	5p tailed mirtron candidate	37	21	14	0	0	0
uc009caf.1_intron_6_0_chr6_54888216_r.3p	5p tailed mirtron candidate	38	27	11	0	0	0
uc009iha.1_intron_10_0_chr7_97543793_f.3p	5p tailed mirtron candidate	38	27	11	0	0	0
uc008wfu.1_intron_3_0_chr4_155389562_f	5p tailed mirtron candidate	40	32	4	0	0	0
uc009fgw.1_intron_9_0_chr7_16701000_f.3p	5p tailed mirtron candidate	41	8	30	0	0	0
uc009kfq.1_intron_11_0_chr7_146753337_f.3p	5p tailed mirtron candidate	41	36	5	0	0	0
uc009jrb.1_intron_3_0_chr7_133553908_r	5p tailed mirtron candidate	42	39	3	0	0	0
uc009mod.1_intron_10_0_chr8_87445132_r	5p tailed mirtron candidate	42	5	37	0	0	0
uc009bdn.1_intron_39_0_chr6_29406535_f	5p tailed mirtron candidate	43	1	42	0	0	0
uc009rps.1_intron_16_0_chr9_108399499_f.3p	3p tailed mirtron candidate	44	28	15	0	0	0
uc009jko.1_intron_10_0_chr7_125917562_f.3p	5p tailed mirtron candidate	45.75	39.5	4	0	0	0
uc009ikc.1_intron_3_0_chr7_105274953_r.3p	5p tailed mirtron candidate	46	38	8	0	0	0
uc009aiz.1_intron_8_0_chr5_143194852_f.3p	5p tailed mirtron candidate	48	1	46	0	0	0
uc009opz.1_intron_0_0_chr9_26786668_r	5p tailed mirtron candidate	48	15	16	0	0	0
uc009ese.1_intron_1_0_chr6_146554813_r.3p	5p tailed mirtron candidate	48.5	40	8.5	0	0	0
uc009gao.1_intron_40_0_chr7_29845154_r.3p	5p tailed mirtron candidate	49	20	29	0	0	0
uc009gzz.1_intron_10_0_chr7_54346205_r.3p	5p tailed mirtron candidate	49	44	3	0	0	0
uc009iac.1_intron_14_0_chr7_87430785_f	5p tailed mirtron candidate	49	13	34	0	0	0
uc009elq.1_intron_8_0_chr6_135730355_r.3p	5p tailed mirtron candidate	50	3	47	0	0	0
uc009ahb.1_intron_1_0_chr5_140243833_r.3p	5p tailed mirtron	52	45	7	0	0	0
uc008zhj.1_intron_10_0_chr5_120975810_f.3p	5p tailed mirtron candidate	52.03	26	23	0	0	0
uc009drf.1_intron_7_0_chr6_124652341_f	5p tailed mirtron candidate	53	45	8	0	0	0
uc009kgl.1_intron_9_0_chr7_147192060_r.3p	5p tailed mirtron candidate	53.5	19	33.5	0	0	0
uc009gfe.1_intron_5_0_chr7_31355648_r	5p tailed mirtron candidate	54	50	3	0	0	0
uc009mbn.1_intron_1_0_chr8_73293132_r	5p tailed mirtron candidate	55	33	17	0	0	0
uc009npa.1_intron_14_0_chr8_119976177_f.3p	5p tailed mirtron	55.5	19	34.5	0	0	0
uc009acd.1_intron_3_0_chr5_137753272_r	5p tailed mirtron candidate	56.3333	26.33	29	0	0	0
uc009mwj.1_intron_2_0_chr8_97003675_f.3p	5p tailed mirtron candidate	57	1	56	0	0	0
uc009fyh.1_intron_7_0_chr7_29102338_r	mirtron candidate	57	30	19	0	0	0
uc009gho.1_intron_5_0_chr7_31825277_r.3p	5p tailed mirtron	58.8333	45.5	8	0	0	0
uc009nms.1_intron_5_0_chr8_114213501_r.3p	5p tailed mirtron	59	31	26	0	0	0
uc009fyt.1_intron_0_0_chr7_29172044_r.3p	mirtron candidate	59	9	49	0	0	0
uc009dtk.1_intron_0_0_chr6_125046279_f.3p	5p tailed mirtron	59.9	10.4	42	0	0	0
uc008yzx.1_intron_9_0_chr5_115168470_f.3p	5p tailed mirtron	60	49	8	0	0	0
uc009cly.1_intron_6_0_chr6_83006429_f	5p tailed mirtron candidate	60	26	34	0	0	0
uc009ntb.1_intron_13_0_chr8_125010844_r	5p tailed mirtron candidate	61	48	5	0	0	0
uc009tmf.1_intron_3_0_chrX_70922793_f.3p	5p tailed mirtron candidate	61	35	23	0	0	0
uc009jrr.1_intron_2_0_chr7_133636891_r	5p tailed mirtron candidate	62	46	9	0	0	0
uc009gun.1_intron_3_0_chr7_52560451_r	5p tailed mirtron candidate	62.3733	22	39	0	0	0
uc009ijy.1_intron_27_0_chr7_105227414_r	5p tailed mirtron candidate	62.5	1	59	0	0	0
uc009fxy.1_intron_1_0_chr7_28959706_f	mirtron candidate	63	14	40	0	0	0
uc008zqv.1_intron_19_0_chr5_125516497_r.3p	5p tailed mirtron candidate	63.51	47.5	11	0	0	0
uc009ner.1_intron_16_0_chr8_108475537_r	5p tailed mirtron	64	10	51	0	0	0
uc008zos.1_intron_2_0_chr5_124439743_f	5p tailed mirtron candidate	64	8	34	0	0	0
uc008vud.1_intron_2_0_chr4_147521045_r	5p tailed mirtron	65	51	13	0	0	0
uc008zzm.1_intron_9_0_chr5_136507146_f.3p	5p tailed mirtron candidate	65	5	60	0	0	0
uc009hzo.1_intron_10_0_chr7_87365218_f	5p tailed mirtron candidate	65	56	6	0	0	0
uc009kme.1_intron_11_0_chr7_149174342_f.3p	5p tailed mirtron	66	10	55	0	0	0
uc008yzn.1_intron_13_0_chr5_114852699_f.3p	5p tailed mirtron	67	34	32	0	0	0
uc009rrz.1_intron_21_0_chr9_109013041_f	mirtron candidate	71	5	51	0	0	0
uc009gtx.1_intron_9_0_chr7_52428373_f	5p tailed mirtron	71.0227	29	40	0	0	0
uc008vjf.1_intron_34_0_chr4_137124761_f	5p tailed mirtron candidate	71.9262	56.33	11	0	0	0
uc008xvf.1_intron_4_0_chr5_77284143_f.3p	5p tailed mirtron candidate	76	69	7	0	0	0
uc009dsx.1_intron_4_0_chr6_124974571_f	5p tailed mirtron candidate	76	55	4	0	0	0
uc009ubh.1_intron_2_0_chrX_103174820_r.3p	5p tailed mirtron candidate	77	11	66	0	0	0
uc009kgj.1_intron_9_0_chr7_147172708_r	5p tailed mirtron	79	67	6	0	0	0
uc009clt.1_intron_8_0_chr6_82999641_f	5p tailed mirtron	83	76	6	0	0	0
uc009sct.1_intron_6_0_chr9_120862122_f.3p	5p tailed mirtron	83	22	50.5	0	0	0
uc008vuw.1_intron_4_0_chr4_147968107_f	5p tailed mirtron candidate	84	11	69	0	0	0
uc009rsx.1_intron_10_0_chr9_109791635_f.3p	5p tailed mirtron	90.5	28	60	0	0	0
uc008zeg.1_intron_21_0_chr5_116041077_f.3p	5p tailed mirtron candidate	90.5	82	5	0	0	0
uc009dtd.1_intron_3_0_chr6_124997344_f	5p tailed mirtron candidate	91	53	34	0	0	0
uc008uqy.1_intron_3_0_chr4_124420978_f	5p tailed mirtron	92	82	6	0	0	0
uc008zzt.1_intron_16_0_chr5_136580524_f.3p	5p tailed mirtron	92	19	71	0	0	0
uc009mmg.1_intron_0_0_chr8_86736705_r.3p	5p tailed mirtron candidate	92.74	34.5	42	0	0	0
uc009ror.1_intron_2_0_chr9_107983829_f	mirtron	93	14	78	0	0	0
uc009gif.1_intron_4_0_chr7_31919351_r	5p tailed mirtron candidate	94	24	46	0	0	0
uc009gvc.1_intron_0_0_chr7_52677376_r	5p tailed mirtron candidate	94	74	19	0	0	0
uc008zyu.1_intron_0_0_chr5_136211676_r	5p tailed mirtron	94.5	78	12	0	0	0
uc009kpn.1_intron_11_0_chr7_150756576_r.3p	5p tailed mirtron	95	79	12	0	0	0
uc009mrd.1_intron_0_0_chr8_90662057_f	5p tailed mirtron	96	23	71	0	0	0
uc009kqs.1_intron_2_0_chr7_152103586_f.3p	5p tailed mirtron candidate	101.833	93.83	4	0	0	0
uc009fyn.1_intron_8_0_chr7_29150565_r.3p	5p tailed mirtron candidate	104	99	2	0	0	0
uc008zos.1_intron_12_0_chr5_124446853_f	5p tailed mirtron	105	33	68	0	0	0
uc009pdh.1_intron_3_0_chr9_44208122_f	5p tailed mirtron	107	61	44	0	0	0
uc009okc.1_intron_4_0_chr9_20879941_r	mirtron	107	28	77	0	0	0
uc009ipw.1_intron_2_0_chr7_109058621_f	5p tailed mirtron candidate	107.5	74.5	13	0	0	0
uc009hhd.1_intron_32_0_chr7_73526553_r.3p	5p tailed mirtron	108	97	9	0	0	0
uc009nij.1_intron_14_0_chr8_112080444_r	5p tailed mirtron candidate	108	102	4	0	0	0
uc009alv.1_intron_2_0_chr5_145642689_r.3p	5p tailed mirtron candidate	109	5	95	0	0	0
uc009kar.1_intron_9_0_chr7_138048969_f.3p	5p tailed mirtron	110	88	21	0	0	0
uc009dpr.1_intron_2_0_chr6_122778522_f.3p	5p tailed mirtron candidate	110	107	3	0	0	0
uc009pdf.1_intron_14_0_chr9_44195176_f	5p tailed mirtron candidate	112	81	25	0	0	0
uc008zee.1_intron_9_0_chr5_116030589_f	5p tailed mirtron	114.5	69	41.5	0	0	0
uc008vmq.1_intron_11_0_chr4_139199458_f.3p	5p tailed mirtron	115.2	92	21.2	0	0	0
uc009ojo.1_intron_10_0_chr9_20718534_r.3p	5p tailed mirtron	116	7	105	0	0	0
uc009fkn.1_intron_3_0_chr7_19671934_f	5p tailed mirtron	116.59	72	42	0	0	0
uc009czu.1_intron_1_0_chr6_94556358_r.3p	5p tailed mirtron	118.25	61	56.25	0	0	0
uc009alv.1_intron_11_0_chr5_145657601_r.3p	5p tailed mirtron	119	116	3	0	0	0
uc009rgi.1_intron_8_0_chr9_103122223_r.3p	5p tailed mirtron candidate	123	51	43	0	0	0
uc009gpx.1_intron_11_0_chr7_51793476_r	5p tailed mirtron	124	51	47	0	0	0
uc009prk.1_intron_2_0_chr9_54554051_f.3p	5p tailed mirtron	126	84	42	0	0	0
uc009met.1_intron_10_0_chr8_74236464_r	5p tailed mirtron candidate	134	49	80	0	0	0
uc008vrs.1_intron_0_0_chr4_144767999_r	mirtron candidate	136.5	61	67.5	0	0	0
uc008zei.1_intron_4_0_chr5_116093709_f.3p	5p tailed mirtron	137.5	48.5	86	0	0	0
uc008vmk.1_intron_14_0_chr4_138981281_f	5p tailed mirtron candidate	138	5	132	0	0	0
uc009stw.1_intron_1_0_chrX_20440217_r	3p tailed mirtron	139	94	45	0	0	0
uc009jst.1_intron_5_0_chr7_133940423_r	5p tailed mirtron candidate	144.024	103	22	0	0	0
uc009rno.1_intron_10_0_chr9_107880877_f	5p tailed mirtron candidate	145	9	132	0	0	0
uc009gmt.1_intron_4_0_chr7_50712008_f.3p	5p tailed mirtron	149	90	58	0	0	0
uc008wrm.1_intron_0_0_chr5_23931254_f.3p	5p tailed mirtron candidate	149	128	18	0	0	0
uc009bhz.1_intron_2_0_chr6_34836179_r.3p	5p tailed mirtron candidate	151.5	135	12	0	0	0
uc009aca.1_intron_3_0_chr5_137737852_r	5p tailed mirtron	154.433	101	43	0	0	0
uc009fep.1_intron_2_0_chr7_13510951_f	5p tailed mirtron candidate	157	56	94	0	0	0
uc009npa.1_intron_19_0_chr8_119980858_f.3p	5p tailed mirtron	161	146	12	0	0	0
uc009flq.1_intron_19_0_chr7_19979050_f	5p tailed mirtron candidate	162.7	63.7	88	0	0	0
uc009kob.1_intron_1_0_chr7_149762236_r	5p tailed mirtron candidate	163	64.67	97.33	0	0	0
uc008yrf.1_intron_0_0_chr5_111095094_r	5p tailed mirtron	176	145	21	0	0	0
uc008vns.1_intron_31_0_chr4_140602613_r	5p tailed mirtron candidate	177	10	161	0	0	0
uc008zkg.1_intron_5_0_chr5_122269218_r.3p	5p tailed mirtron	180	145	35	0	0	0
uc009mlc.1_intron_0_0_chr8_86247802_r	5p tailed mirtron candidate	184	3	178	0	0	0
uc009ton.1_intron_3_0_chrX_71560912_f.3p	5p tailed mirtron	188.573	101.5	86.5	0	0	0
uc009mdi.1_intron_1_0_chr8_73996017_f	mirtron candidate	189.667	6.67	173	0	0	0
uc009mns.1_intron_9_0_chr8_87391818_f	5p tailed mirtron	192.5	139.5	48	0	0	0
uc009mwj.1_intron_22_0_chr8_97028365_f.3p	5p tailed mirtron	208	183	24	0	0	0
uc009pgt.1_intron_1_0_chr9_45747604_r.3p	5p tailed mirtron	212.4	189.4	18	0	0	0
uc009sas.1_intron_9_0_chr9_119258528_f	5p tailed mirtron candidate	224.5	217.17	2	0	0	0
uc009kyr.1_intron_1_0_chr8_13885882_r.3p	5p tailed mirtron candidate	224.642	107	63	0	0	0
uc009saj.1_intron_1_0_chr9_119057998_r	5p tailed mirtron candidate	225.5	217.17	3	0	0	0
uc009meh.1_intron_2_0_chr8_74154946_r.3p	5p tailed mirtron	231.167	22.67	207.5	0	0	0
uc008vws.1_intron_11_0_chr4_149029613_r	5p tailed mirtron	232.5	119.5	110	0	0	0
uc009ndj.1_intron_4_0_chr8_108139352_f	5p tailed mirtron	240	170	60	0	0	0
uc009dlj.1_intron_3_0_chr6_118034577_f.3p	5p tailed mirtron	244	3	241	0	0	0
uc009nqn.1_intron_10_0_chr8_122477246_f.3p	5p tailed mirtron candidate	254	241	5	0	0	0
uc008wwm.1_intron_4_0_chr5_31221746_f.3p	5p tailed mirtron candidate	261	253	2	0	0	0
uc009lys.1_intron_5_0_chr8_72626423_r.3p	5p tailed mirtron	268.333	223.33	43	0	0	0
uc009gzz.1_intron_5_0_chr7_54338536_r.3p	5p tailed mirtron	269.833	253.33	15.5	0	0	0
uc009gpl.1_intron_1_0_chr7_51724340_f.3p	5p tailed mirtron	274	95	159	0	0	0
uc009frc.1_intron_0_0_chr7_25755029_r	5p tailed mirtron	276	105	171	0	0	0
uc008sic.1_intron_6_0_chr4_40938917_f.3p	5p tailed mirtron	278	212	66	0	0	0
uc008ave.1_intron_7_0_chr17_24371480_r.3p	5p tailed mirtron	282	166	113	0	0	0
uc009dkm.1_intron_6_0_chr6_116595996_r.3p	5p tailed mirtron	284	30	253	0	0	0
uc009jyv.1_intron_8_0_chr7_135431884_r	5p tailed mirtron	293	149	133	0	0	0
uc009fzh.1_intron_2_0_chr7_29345944_r.3p	5p tailed mirtron	294.5	286	6	0	0	0
uc009fre.1_intron_6_0_chr7_25772623_r	5p tailed mirtron	312.833	60.83	246.5	0	0	0
uc009juy.1_intron_9_0_chr7_134450236_f	mirtron candidate	325	22	289.5	0	0	0
uc009nue.1_intron_4_0_chr8_125627855_f.3p	5p tailed mirtron	348.1	115	221.1	0	0	0
uc009guw.1_intron_3_0_chr7_52639256_r.3p	5p tailed mirtron candidate	348.367	110.83	228.53	0	0	0
uc009gso.1_intron_6_0_chr7_52267796_r	5p tailed mirtron	351	184	130	0	0	0
uc008zyi.1_intron_4_0_chr5_135859600_r	5p tailed mirtron	363.333	298.33	62	0	0	0
uc009ahr.1_intron_4_0_chr5_140903100_f	5p tailed mirtron	374.57	292	14.5	0	0	0
uc009evd.1_intron_0_0_chr7_3569010_f	5p tailed mirtron candidate	376	282	26	0	0	0
uc007udo.1_intron_0_0_chr14_58417192_f	5p tailed mirtron	382	41	340	0	0	0
uc009dtn.1_intron_10_0_chr6_125089965_f.3p	5p tailed mirtron candidate	392	195.5	60	0	0	0
uc009mfq.1_intron_0_0_chr8_74843049_f	5p tailed mirtron candidate	392.167	78	62	0	0	0
uc009btf.1_intron_4_0_chr6_47753589_r	5p tailed mirtron	436.5	248	180	0	0	0
uc009dhg.1_intron_3_0_chr6_113654901_f.3p	5p tailed mirtron	445	396	41	0	0	0
uc009pfp.1_intron_4_0_chr9_45074726_r.3p	5p tailed mirtron	463.5	451	7	0	0	0
uc009nhb.1_intron_8_0_chr8_109619925_r	5p tailed mirtron	470.333	41	407.33	0	0	0
uc008bcf.1_intron_2_0_chr17_25968311_r	5p tailed mirtron	560.06	113.56	445.5	0	0	0
uc009jqx.1_intron_4_0_chr7_133511485_r	5p tailed mirtron	598.013	559	31.01	0	0	0
uc009vaj.1_intron_414_0_chr12_115751849_r.3p	5p tailed mirtron	608	559.5	14.5	0	0	0
mmu-mir-101c	miRNA	476.102	0	475.95	0	0	0
mmu-mir-1186	miRNA	99.5412	97.37	0	0	0	0
mmu-mir-1186b	miRNA	14.3333	14.33	0	0	0	0
mmu-mir-1187	miRNA	50.3676	2.66	37.19	0	0	0
mmu-mir-1188	miRNA	4942	4850	1	0	0	0
mmu-mir-1190	miRNA	90	1	86	0	0	0
mmu-mir-1192	miRNA	120.177	99.67	0.06	0	0	0
mmu-mir-1195	miRNA	1179.11	1088.9	80.34	0	0	0
mmu-mir-1197	miRNA	1978.5	104	1684	0	0	0
mmu-mir-1199	miRNA	851.5	746	98	0	0	0
mmu-mir-1264	miRNA	2666.1	1390	1272	0	0	0
mmu-mir-138-1	miRNA	533367	508930	22940.5	0	0	0
mmu-mir-144	miRNA	218655	42324.5	176201	0	0	0
mmu-mir-146a	miRNA	424517	424102	374	0	0	0
mmu-mir-147	miRNA	30478.5	1061.5	29384	0	0	0
mmu-mir-184	miRNA	108481	5161.67	102976	0	0	0
mmu-mir-1843b	miRNA	38935.4	33492.5	5306	0	0	0
mmu-mir-188	miRNA	45901.7	43744	2118	0	0	0
mmu-mir-1892	miRNA	57.5	0	53	0	0	0
mmu-mir-1893	miRNA	142	46	20	0	0	0
mmu-mir-1894	miRNA	32.4	2	11	0	0	0
mmu-mir-1895	miRNA	3.22507	0.02	2.18	0	0	0
mmu-mir-1896	miRNA	1	1	0	0	0	0
mmu-mir-1897	miRNA	1	1	0	0	0	0
mmu-mir-1898	miRNA	1	1	0	0	0	0
mmu-mir-1901	miRNA	5	3	0	0	0	0
mmu-mir-1902	miRNA	55	5	11	0	0	0
mmu-mir-1903	miRNA	59.9167	6	20	0	0	0
mmu-mir-1904	miRNA	2	1	0	0	0	0
mmu-mir-1905	miRNA	8	2	0	0	0	0
mmu-mir-1906-1	miRNA	7.3125	2	0.5	0	0	0
mmu-mir-1906-2	miRNA	7.3125	2	0.5	0	0	0
mmu-mir-1907	miRNA	40	0	17.5	0	0	0
mmu-mir-1912	miRNA	1572	642	926	0	0	0
mmu-mir-1927	miRNA	705.125	143	553	0	0	0
mmu-mir-1928	miRNA	8.21	1	0.2	0	0	0
mmu-mir-1929	miRNA	6403	5344	1007	0	0	0
mmu-mir-193	miRNA	98480.2	18054	80367.8	0	0	0
mmu-mir-1931	miRNA	801.991	26	767.95	0	0	0
mmu-mir-1932	miRNA	130	2	115	0	0	0
mmu-mir-1933	miRNA	1115.5	308	801.5	0	0	0
mmu-mir-1934	miRNA	5987.09	822	5045	0	0	0
mmu-mir-1935	miRNA	403.189	157.75	24.84	0	0	0
mmu-mir-1936	miRNA	177	0	177	0	0	0
mmu-mir-1938	miRNA	389	321	60	0	0	0
mmu-mir-193b	miRNA	52151.5	16253	35857	0	0	0
mmu-mir-1940	miRNA	1635.83	1543.33	54.5	0	0	0
mmu-mir-1941	miRNA	21694.2	19041	2611.5	0	0	0
mmu-mir-1942	miRNA	1	0	0	0	0	0
mmu-mir-1943	miRNA	3207	2968	237	0	0	0
mmu-mir-1945	miRNA	508	0	507	0	0	0
mmu-mir-1946a	miRNA	9.71886	7.93	0.03	0	0	0
mmu-mir-1946b	miRNA	58.9799	49.7	6.68	0	0	0
mmu-mir-1947	miRNA	4971	4894	45	0	0	0
mmu-mir-1948	miRNA	6299.23	334.23	5965	0	0	0
mmu-mir-1949	miRNA	5152.5	16	4756	0	0	0
mmu-mir-1950	miRNA	327.896	323.67	2.22	0	0	0
mmu-mir-1951	miRNA	184.5	1	182.5	0	0	0
mmu-mir-1952	miRNA	3	0	0	0	0	0
mmu-mir-1953	miRNA	1278.5	1247.5	20	0	0	0
mmu-mir-1954	miRNA	165.146	153.61	9.86	0	0	0
mmu-mir-1955	miRNA	1667.17	879.67	782.5	0	0	0
mmu-mir-1956	miRNA	630	613	11	0	0	0
mmu-mir-1957	miRNA	32.3253	19.24	0	0	0	0
mmu-mir-1958	miRNA	1339.67	11	1327.67	0	0	0
mmu-mir-1960	miRNA	2158.67	2057	92	0	0	0
mmu-mir-1961	miRNA	16	0	16	0	0	0
mmu-mir-1962	miRNA	63.51	7	52.5	0	0	0
mmu-mir-1965	miRNA	41269	1	41179	0	0	0
mmu-mir-1967	miRNA	84	5.5	78	0	0	0
mmu-mir-1968	miRNA	8229	8082	120	0	0	0
mmu-mir-196a-1	miRNA	92074.3	89349.2	2596	0	0	0
mmu-mir-196a-2	miRNA	128283	127155	1035	0	0	0
mmu-mir-196b	miRNA	516417	511004	4839	0	0	0
mmu-mir-1970	miRNA	55.4006	45.08	3	0	0	0
mmu-mir-1971	miRNA	58	58	0	0	0	0
mmu-mir-201	miRNA	23014.5	21875	1130.5	0	0	0
mmu-mir-202	miRNA	733106	676491	56597	0	0	0
mmu-mir-207	miRNA	37.3704	14	1	0	0	0
mmu-mir-208a	miRNA	12481.5	1536	10801.5	0	0	0
mmu-mir-208b	miRNA	5084	26	5045	0	0	0
mmu-mir-2137	miRNA	44.5	0	44.5	0	0	0
mmu-mir-2139	miRNA	20.3333	7.83	4	0	0	0
mmu-mir-215	miRNA	1.69544e+07	1.68368e+07	117648	0	0	0
mmu-mir-216a	miRNA	105812	98899	6814.5	0	0	0
mmu-mir-217	miRNA	199244	195882	3252.67	0	0	0
mmu-mir-2861	miRNA	5	1	1	0	0	0
mmu-mir-28b	miRNA	270	270	0	0	0	0
mmu-mir-290	miRNA	563787	548484	13237	0	0	0
mmu-mir-291a	miRNA	2.61769e+06	751881	1.8649e+06	0	0	0
mmu-mir-291b	miRNA	60424.7	24081.7	36049	0	0	0
mmu-mir-292	miRNA	2164235	1.22052e+06	915045	0	0	0
mmu-mir-293	miRNA	3.63873e+06	178432	3459940	0	0	0
mmu-mir-294	miRNA	4.63015e+06	62861.2	4.56693e+06	0	0	0
mmu-mir-295	miRNA	5555784	122865	5431023	0	0	0
mmu-mir-297a-1	miRNA	1256.55	1254.14	0	0	0	0
mmu-mir-297a-2	miRNA	2920.08	0	2913.96	0	0	0
mmu-mir-297a-5	miRNA	2952.22	1338.79	1375.29	0	0	0
mmu-mir-297a-6	miRNA	2886.52	0.12	2877.11	0	0	0
mmu-mir-29b-1	miRNA	1.45978e+06	4128	1.44375e+06	0	0	0
mmu-mir-29b-2	miRNA	1.49214e+06	4832.83	1.47511e+06	0	0	0
mmu-mir-302c	miRNA	12634	399	12226	0	0	0
mmu-mir-3058	miRNA	663	508	152	0	0	0
mmu-mir-3059	miRNA	5195	4912.67	270	0	0	0
mmu-mir-3061	miRNA	1814	1245	560	0	0	0
mmu-mir-3062	miRNA	661.25	551	41	0	0	0
mmu-mir-3063	miRNA	267	73	145	0	0	0
mmu-mir-3065	miRNA	68888.8	67191.5	1589	0	0	0
mmu-mir-3066	miRNA	2303	2167	135	0	0	0
mmu-mir-3067	miRNA	75	65	10	0	0	0
mmu-mir-3069	miRNA	1032.5	553	288	0	0	0
mmu-mir-3070a	miRNA	838.5	31.5	806	0	0	0
mmu-mir-3070b	miRNA	267.5	31.5	235	0	0	0
mmu-mir-3071	miRNA	1222.5	300	918.5	0	0	0
mmu-mir-3072	miRNA	11512.7	1654	9848.67	0	0	0
mmu-mir-3073	miRNA	905	603	293	0	0	0
mmu-mir-3074-1	miRNA	44462.8	42539.3	1916.5	0	0	0
mmu-mir-3074-2	miRNA	42554.3	42534.3	12	0	0	0
mmu-mir-3075	miRNA	705	675	29	0	0	0
mmu-mir-3079	miRNA	4435.53	3525	805.33	0	0	0
mmu-mir-3080	miRNA	73	43	28	0	0	0
mmu-mir-3081	miRNA	2143	272	1858	0	0	0
mmu-mir-3083	miRNA	731.5	632	94	0	0	0
mmu-mir-3085	miRNA	1582	188	1391	0	0	0
mmu-mir-3086	miRNA	8701	7932	686	0	0	0
mmu-mir-3088	miRNA	429	47	382	0	0	0
mmu-mir-3089	miRNA	215.5	10	199	0	0	0
mmu-mir-3090	miRNA	6192.5	1312	4878.5	0	0	0
mmu-mir-3091	miRNA	647	426	204	0	0	0
mmu-mir-3092	miRNA	249	11	176	0	0	0
mmu-mir-3093	miRNA	373	94	275	0	0	0
mmu-mir-3096	miRNA	32532.2	26952.3	3356.33	0	0	0
mmu-mir-3096b	miRNA	35025.2	29205.3	3506.33	0	0	0
mmu-mir-3098	miRNA	219.847	151.85	67	0	0	0
mmu-mir-3101	miRNA	333.5	211.5	121	0	0	0
mmu-mir-3105	miRNA	1095.77	659.1	423	0	0	0
mmu-mir-3106	miRNA	5075	5035	39	0	0	0
mmu-mir-3108	miRNA	1382	1263	117	0	0	0
mmu-mir-3109	miRNA	1580	1126	406	0	0	0
mmu-mir-3110	miRNA	932	850	22	0	0	0
mmu-mir-3112	miRNA	171	167	4	0	0	0
mmu-mir-3113	miRNA	98.0333	86	9.7	0	0	0
mmu-mir-327	miRNA	1	1	0	0	0	0
mmu-mir-341	miRNA	132769	1407	130203	0	0	0
mmu-mir-344b	miRNA	8829.54	5	8823	0	0	0
mmu-mir-344e	miRNA	16677.9	260.33	16406	0	0	0
mmu-mir-344f	miRNA	4993.25	3313.75	1643	0	0	0
mmu-mir-344g	miRNA	319.5	143	150	0	0	0
mmu-mir-3470a	miRNA	367.455	354.28	1.81	0	0	0
mmu-mir-3470b	miRNA	627.755	583.67	13.85	0	0	0
mmu-mir-3471-1	miRNA	56.39	25.87	0	0	0	0
mmu-mir-3471-2	miRNA	101.725	79.59	2.93	0	0	0
mmu-mir-3472	miRNA	19	2.03	13.72	0	0	0
mmu-mir-3473	miRNA	61.11	0.18	59.7	0	0	0
mmu-mir-3473b	miRNA	1110.29	10.79	1096.37	0	0	0
mmu-mir-3473c	miRNA	321.25	11.02	308	0	0	0
mmu-mir-3474	miRNA	2164	2130	32	0	0	0
mmu-mir-367	miRNA	7985.33	74	7650	0	0	0
mmu-mir-376a	miRNA	568639	44933.5	522827	0	0	0
mmu-mir-378b	miRNA	8998.97	0	8998.97	0	0	0
mmu-mir-3960	miRNA	3.08681	0	2.06	0	0	0
mmu-mir-3961	miRNA	2	0	1	0	0	0
mmu-mir-3962	miRNA	952	0	952	0	0	0
mmu-mir-3963	miRNA	4878.33	4878.33	0	0	0	0
mmu-mir-3964	miRNA	968	0	968	0	0	0
mmu-mir-3965	miRNA	648.5	4	0	0	0	0
mmu-mir-3966	miRNA	7	7	0	0	0	0
mmu-mir-3967	miRNA	14	0	0	0	0	0
mmu-mir-3968	miRNA	109	0	106	0	0	0
mmu-mir-3969	miRNA	49	49	0	0	0	0
mmu-mir-3970	miRNA	1480	1480	0	0	0	0
mmu-mir-3971	miRNA	1	0	1	0	0	0
mmu-mir-432	miRNA	1	0	0	0	0	0
mmu-mir-449b	miRNA	195	160	33	0	0	0
mmu-mir-449c	miRNA	31964.8	30636	695	0	0	0
mmu-mir-453	miRNA	7	3	2	0	0	0
mmu-mir-463	miRNA	22366.5	12536	9777.5	0	0	0
mmu-mir-465a	miRNA	61404.7	46325	14829.8	0	0	0
mmu-mir-465b-1	miRNA	25968.5	11004.1	14829.8	0	0	0
mmu-mir-465b-2	miRNA	25968.5	11004.1	14829.8	0	0	0
mmu-mir-465c-1	miRNA	51206.4	36491	14596	0	0	0
mmu-mir-465c-2	miRNA	51206.4	36491	14596	0	0	0
mmu-mir-466f-1	miRNA	1999.91	1733.27	22.9	0	0	0
mmu-mir-466f-4	miRNA	1741.67	1733.27	0.01	0	0	0
mmu-mir-466h	miRNA	4552.56	4146.54	356.95	0	0	0
mmu-mir-466i	miRNA	58.9505	27.7	24.72	0	0	0
mmu-mir-466j	miRNA	65.8016	1.33	63.76	0	0	0
mmu-mir-466l	miRNA	434.509	5.13	305.32	0	0	0
mmu-mir-466m	miRNA	561.523	240.96	303.65	0	0	0
mmu-mir-466q	miRNA	867.72	23.91	776.32	0	0	0
mmu-mir-467f	miRNA	14.964	0.02	10.48	0	0	0
mmu-mir-467g	miRNA	7.44174	5.84	0.13	0	0	0
mmu-mir-467h	miRNA	38.45	0	37.41	0	0	0
mmu-mir-468	miRNA	52617.6	46989	2874	0	0	0
mmu-mir-470	miRNA	51233.5	35947.5	15193	0	0	0
mmu-mir-471	miRNA	34274.5	25706	8560.5	0	0	0
mmu-mir-489	miRNA	13905	72	13664.5	0	0	0
mmu-mir-490	miRNA	5440.9	1168.06	4269.5	0	0	0
mmu-mir-497	miRNA	128762	125654	2540	0	0	0
mmu-mir-504	miRNA	2547.33	2337.17	197.17	0	0	0
mmu-mir-5046	miRNA	1	1	0	0	0	0
mmu-mir-509	miRNA	3	0	2	0	0	0
mmu-mir-5097	miRNA	7391.41	0	1585.81	0	0	0
mmu-mir-5098	miRNA	121.08	66	21.47	0	0	0
mmu-mir-5099	miRNA	26590	0	26023.4	0	0	0
mmu-mir-5100	miRNA	35137.2	1	35131.2	0	0	0
mmu-mir-5101	miRNA	155.25	0	153.25	0	0	0
mmu-mir-5102	miRNA	16210.7	10391.4	3588.63	0	0	0
mmu-mir-5103	miRNA	263.154	9	251	0	0	0
mmu-mir-5104	miRNA	716.822	34.82	681	0	0	0
mmu-mir-5106	miRNA	15.4278	0	14.33	0	0	0
mmu-mir-5108	miRNA	47	0	47	0	0	0
mmu-mir-5109	miRNA	70350.4	0	56770.3	0	0	0
mmu-mir-5110	miRNA	55.5	55.5	0	0	0	0
mmu-mir-5111	miRNA	20.3546	5.18	3.02	0	0	0
mmu-mir-5112	miRNA	16.5	14.5	0	0	0	0
mmu-mir-5113	miRNA	5633.7	5581.37	10	0	0	0
mmu-mir-5114	miRNA	30495	30245	186	0	0	0
mmu-mir-5115	miRNA	30786.5	30687	4	0	0	0
mmu-mir-5116	miRNA	467	334	107.5	0	0	0
mmu-mir-5117	miRNA	123602	18472.5	80143.5	0	0	0
mmu-mir-5118	miRNA	2.02	0.01	2	0	0	0
mmu-mir-5119	miRNA	95	0	95	0	0	0
mmu-mir-5120	miRNA	48	43	3	0	0	0
mmu-mir-5121	miRNA	11819.3	6	11781	0	0	0
mmu-mir-5122	miRNA	836.26	468	54.62	0	0	0
mmu-mir-5123	miRNA	900.646	71.5	376.5	0	0	0
mmu-mir-5124	miRNA	8.17507	7	1.06	0	0	0
mmu-mir-5125	miRNA	144	41	101	0	0	0
mmu-mir-5127	miRNA	16	0	15	0	0	0
mmu-mir-5128	miRNA	2309.46	59	2240.69	0	0	0
mmu-mir-5130	miRNA	258	139	25	0	0	0
mmu-mir-5131	miRNA	161	54	18	0	0	0
mmu-mir-5133	miRNA	334	240	9	0	0	0
mmu-mir-5135	miRNA	53	3	25	0	0	0
mmu-mir-5136	miRNA	190.111	58	55	0	0	0
mmu-mir-539	miRNA	18057.6	11998	5632.92	0	0	0
mmu-mir-544	miRNA	21551.8	16714.5	4801	0	0	0
mmu-mir-546	miRNA	2770	1032	862	0	0	0
mmu-mir-547	miRNA	18300	100	18198	0	0	0
mmu-mir-568	miRNA	4	2	1	0	0	0
mmu-mir-592	miRNA	6016	5921	92	0	0	0
mmu-mir-599	miRNA	68	68	0	0	0	0
mmu-mir-653	miRNA	2284	2167	117	0	0	0
mmu-mir-654	miRNA	152	4	144	0	0	0
mmu-mir-669e	miRNA	3360.72	2746.38	558.57	0	0	0
mmu-mir-669h	miRNA	4996.61	4637	17.56	0	0	0
mmu-mir-669i	miRNA	118.114	50.1	46.88	0	0	0
mmu-mir-669j	miRNA	24.7487	13.18	9.8	0	0	0
mmu-mir-669k	miRNA	171.534	50.1	109.26	0	0	0
mmu-mir-669n	miRNA	41.0095	31.01	0	0	0	0
mmu-mir-675	miRNA	12610	7006	5508	0	0	0
mmu-mir-677	miRNA	8210	6828.5	786	0	0	0
mmu-mir-678	miRNA	22	5	3	0	0	0
mmu-mir-680-1	miRNA	3.29143	2.07	1.07	0	0	0
mmu-mir-680-2	miRNA	6.04935	2.07	0.69	0	0	0
mmu-mir-680-3	miRNA	2.34333	1.33	1	0	0	0
mmu-mir-682	miRNA	85.3245	26.79	13.42	0	0	0
mmu-mir-683-1	miRNA	6.5	0	3.5	0	0	0
mmu-mir-683-2	miRNA	6.5	0	3.5	0	0	0
mmu-mir-684-1	miRNA	21.8759	1.38	0.92	0	0	0
mmu-mir-684-2	miRNA	21.3045	1.38	0.92	0	0	0
mmu-mir-686	miRNA	94.1667	17.5	11.33	0	0	0
mmu-mir-688	miRNA	45.25	6	19	0	0	0
mmu-mir-692-1	miRNA	25.8074	0.82	12.03	0	0	0
mmu-mir-692-2	miRNA	194.03	8.9	98.9	0	0	0
mmu-mir-693	miRNA	1167.5	41.5	962	0	0	0
mmu-mir-694	miRNA	134	2	132	0	0	0
mmu-mir-697	miRNA	1	1	0	0	0	0
mmu-mir-700	miRNA	23582.2	11374	11022	0	0	0
mmu-mir-703	miRNA	2076.11	102.99	912	0	0	0
mmu-mir-705	miRNA	2.8619	0.53	0	0	0	0
mmu-mir-706	miRNA	1.69	1.42	0	0	0	0
mmu-mir-707	miRNA	27	1	10	0	0	0
mmu-mir-709	miRNA	11.97	0	10.74	0	0	0
mmu-mir-713	miRNA	17.276	1.17	6.5	0	0	0
mmu-mir-717	miRNA	3	2	1	0	0	0
mmu-mir-718	miRNA	10	6	1	0	0	0
mmu-mir-719	miRNA	58	23	6	0	0	0
mmu-mir-720	miRNA	1892.69	0	1891.69	0	0	0
mmu-mir-721	miRNA	22	0	0	0	0	0
mmu-mir-741	miRNA	147224	18397	128662	0	0	0
mmu-mir-742	miRNA	16433.3	1289	15138.3	0	0	0
mmu-mir-743a	miRNA	96576	2314	94236	0	0	0
mmu-mir-743b	miRNA	190860	6321	184529	0	0	0
mmu-mir-758	miRNA	7522.5	1369	6147.5	0	0	0
mmu-mir-759	miRNA	1	1	0	0	0	0
mmu-mir-761	miRNA	7	2	1	0	0	0
mmu-mir-763	miRNA	56	47	5	0	0	0
mmu-mir-764	miRNA	1615.5	641.5	964	0	0	0
mmu-mir-767	miRNA	20	20	0	0	0	0
mmu-mir-770	miRNA	38939	13773	25113	0	0	0
mmu-mir-802	miRNA	20418.5	10500	9897.5	0	0	0
mmu-mir-804	miRNA	1	0	1	0	0	0
mmu-mir-871	miRNA	86777.8	41612	45087.2	0	0	0
mmu-mir-873	miRNA	18989	16922.3	2051	0	0	0
mmu-mir-874	miRNA	13271	1392	11874	0	0	0
mmu-mir-875	miRNA	360	294	66	0	0	0
mmu-mir-876	miRNA	83	73	9	0	0	0
mmu-mir-878	miRNA	46658	21518	25128	0	0	0
mmu-mir-879	miRNA	14403.7	12499.8	1902	0	0	0
mmu-mir-880	miRNA	77895	694	77194	0	0	0
mmu-mir-881	miRNA	118344	9342	108999	0	0	0
mmu-mir-882	miRNA	1	1	0	0	0	0
mmu-mir-883a	miRNA	42208.5	11394.5	30750	0	0	0
mmu-mir-883b	miRNA	9660.5	3523.5	6122	0	0	0
uc009mzd.1_intron_0_0_chr8_98277051_r.3p	5p tailed mirtron	655	637	16	0	0	0
uc007gew.1_intron_4_0_chr10_80291542_f	5p tailed mirtron	672	88	571	0	0	0
uc008xbn.1_intron_0_0_chr5_34241559_r	5p tailed mirtron	674.5	638	36.5	0	0	0
uc008isc.1_intron_27_0_chr2_25298273_f	5p tailed mirtron	736.167	446.17	289	0	0	0
uc009act.1_intron_3_0_chr5_137970738_r	5p tailed mirtron	759	45	711	0	0	0
uc009jqx.1_intron_7_0_chr7_133511878_r	5p tailed mirtron candidate	799	1	795	0	0	0
uc009tof.1_intron_1_0_chrX_71519366_r	mirtron	851	636	215	0	0	0
uc009pud.1_intron_8_0_chr9_56985182_f	5p tailed mirtron candidate	861	725	136	0	0	0
uc009tno.1_intron_12_0_chrX_71268873_r	5p tailed mirtron	975	765	200	0	0	0
uc009onx.1_intron_1_0_chr9_21918388_r.3p	5p tailed mirtron	987	980	6	0	0	0
uc007svc.1_intron_11_0_chr14_31384432_f.3p	5p tailed mirtron	998.5	422	576	0	0	0
uc008wcl.1_intron_6_0_chr4_154345664_f.3p	5p tailed mirtron candidate	1026	1	1020	0	0	0
uc009mpd.1_intron_1_0_chr8_87585985_f	mirtron	1040.5	355.5	675	0	0	0
uc008vpz.1_intron_0_0_chr4_142726003_r.3p	5p tailed mirtron	1207	1197	10	0	0	0
uc009jrx.1_intron_8_0_chr7_133722988_r.3p	5p tailed mirtron	1335	1323	12	0	0	0
uc009omn.1_intron_10_0_chr9_21614385_r.3p	5p tailed mirtron	1465.83	1437	21	0	0	0
uc009nuf.1_intron_11_0_chr8_125654006_f	mirtron	3359.17	2687.17	634	0	0	0
uc008faz.1_intron_7_0_chr18_60971576_f	5p tailed mirtron	5932	5875	38	0	0	0
uc007yqd.1_intron_0_0_chr16_20604525_f	Mirtron	22070.9	21028.7	1029.25	0	0	0

## Sheet: Human_Detail
Locus	Type	Total_Reads	Fivep_Reads	Threep_Reads	SRR207113 5p + 3p	SRR207114 5p + 3p	RoviraIPAgo2 5p + 3p	Ago_sum		Library	Total reads	Clipped pass	Mapped reads	miRNA reads perfect	mirtron reads perfect	miRNA reads untemplated	mirtron reads untemplated
hsa-let-7a-1	miRNA	1.85764e+07	1.85619e+07	13072.2	160765	130723	159954	451442		SRR207113	17899848	15548337	12289588	12065756	5354	2100359	3107
hsa-let-7a-2	miRNA	1.85067e+07	1.85052e+07	299	160837	130623	159586	451046		SRR207114	17686372	16435810	13104170	12399432	3686	1882990	2196
hsa-let-7a-3	miRNA	1.86149e+07	1.86003e+07	13482.2	178844	138141	161378	478362		RoviraIPAgo2	29483510	16676925	11178615	6821270	2759	359239	561
hsa-let-7b	miRNA	30392865	30373357	17981	1.5339e+06	1141043	150975	2.82591e+06
hsa-let-7c	miRNA	1.42928e+07	1.42911e+07	1000	497099	208871	7964.25	713935
hsa-let-7d	miRNA	5666029	5639111	26793	15907	9960	34786	60653
hsa-let-7e	miRNA	4.07834e+06	4.07358e+06	4181	19411	17641	34495	71547
hsa-let-7f-1	miRNA	4.6088e+07	4.608e+07	5943.5	115678	90242.5	351562	557482
hsa-let-7f-2	miRNA	4.84387e+07	4.84357e+07	1652	113612	89355.5	352854	555822
hsa-let-7g	miRNA	2.16059e+07	2.16024e+07	3219	37121.3	29834.7	60706.7	127663
hsa-let-7i	miRNA	6554437	6535689	18360	30939	20787	132649	184375
hsa-mir-1-1	miRNA	586371	100	586270	12.8333	1.5	33	47.3333
hsa-mir-1-2	miRNA	598242	47	598190	12.8333	1.5	33	47.3333
hsa-mir-100	miRNA	2.17905e+06	2175268	3746.5	193961	133750	3	327714
hsa-mir-101-1	miRNA	5.18952e+06	6828.33	5182605	63738	52143.2	18181.2	134062
hsa-mir-101-2	miRNA	5.2714e+06	272	5270800	66798	53283.2	18576.2	138657
hsa-mir-103a-1	miRNA	6.24743e+06	559.5	6.23963e+06	11874.7	8688	22173.4	42736.1
hsa-mir-103a-2	miRNA	6.40919e+06	4579	6.39769e+06	11895.7	8668	22182.4	42746.1
hsa-mir-105-1	miRNA	17934.3	16118.3	1801	4837.33	2724	9.5	7570.83
hsa-mir-105-2	miRNA	17972.3	16118.3	1845	4843.33	2727	9.5	7579.83
hsa-mir-106a	miRNA	50980.5	49675	1266.5	489	360.5	8.25	857.75
hsa-mir-106b	miRNA	1.20815e+06	1.11165e+06	96148	13058	12629	7516.17	33203.2
hsa-mir-107	miRNA	2.45609e+06	439.33	2.4555e+06	313.667	186	505.917	1005.58
hsa-mir-10a	miRNA	2.06322e+06	2040527	21651	229346	172275	3065	404686
hsa-mir-10b	miRNA	770199	756930	12810	49650	35175	35	84860
hsa-mir-1178	miRNA	4	2	2	0	0	0	0
hsa-mir-1179	miRNA	1286.5	1252.5	34	1	0	5	6
hsa-mir-1180	miRNA	12455	350	12105	76	72	50	198
hsa-mir-1181	miRNA	524.008	25.5	432.92	0	0	2	2
hsa-mir-1182	miRNA	4	0	1	0	0	0	0
hsa-mir-1184-1	miRNA	1	0.33	0	0	0	0	0
hsa-mir-1184-2	miRNA	1	0.33	0	0	0	0	0
hsa-mir-1184-3	miRNA	1	0.33	0	0	0	0	0
hsa-mir-1185-1	miRNA	9321	3752.5	5568.5	0	0	0	0
hsa-mir-1185-2	miRNA	5447	3752.5	1694.5	0	0	0	0
hsa-mir-1193	miRNA	214	210	4	0	0	0	0
hsa-mir-1197	miRNA	1294.5	7	1264.5	0	0	0	0
hsa-mir-1204	miRNA	7	5	0	0	0	0	0
hsa-mir-1206	miRNA	1	0	1	0	0	1	1
hsa-mir-1207	miRNA	0.5	0.5	0	0	0	0	0
hsa-mir-122	miRNA	60664071	6.0505e+07	158508	54	8.5	0	62.5
uc002lef.2_intron_4_0_chr18_47801416_r	5p tailed mirtron candidate	1	1	0	0	0	0	0		SRR207113
uc001txh.1_intron_14_0_chr12_120151454_r.3p	5p tailed mirtron	4	2	2	0	0	0	0		SRR207114
uc002ddd.2_intron_7_0_chr16_15141778_r	5p tailed mirtron candidate	4	1	3	0	0	0	0		RoviraIPAgo2
uc001zih.2_intron_2_0_chr15_34674270_r	mirtron	4.85257	1.19	3.54	0.105263	0.105263	0.0526316	0.263158
uc004cjs.2_intron_1_0_chr9_139747662_f	mirtron candidate	5	0	5	0	0	0	0
uc002cgm.1_intron_4_0_chr16_332531_f	5p tailed mirtron candidate	6	3	2	0	0	0	0
uc003ayk.1_intron_2_0_chr22_40416013_f.3p	5p tailed mirtron candidate	6	0	6	0	0	0	0
hsa-mir-1233-2	miRNA	4.85257	1.19	3.54	0.105263	0.105263	0.0526316	0.263158
uc002mov.2_intron_7_0_chr19_10662798_f	mirtron	9	1	8	0	0	2	2
uc001uaq.2_intron_8_0_chr12_121882076_r	5p tailed mirtron	18	16	1	8	0	0	8
uc001agl.1_intron_14_0_chr1_1563780_f	3p tailed mirtron candidate	19	17	2	0	0	0	0
hsa-mir-124-1	miRNA	294381	1111.5	293263	1.33333	0	0	1.33333
hsa-mir-124-2	miRNA	294435	1104.5	293245	1.33333	0	0	1.33333
hsa-mir-124-3	miRNA	294338	1086	293246	1.33333	0	0	1.33333
hsa-mir-1243	miRNA	396	395	0	0	0	0	0
hsa-mir-1244-1	miRNA	79.9227	4.95	55.42	0	0	2.84286	2.84286
hsa-mir-1244-2	miRNA	79.9227	4.95	55.42	0	0	2.84286	2.84286
hsa-mir-1244-3	miRNA	78.0893	4.95	55.42	0	0	2.84286	2.84286
hsa-mir-1245	miRNA	389	93	296	0	0	0	0
hsa-mir-1245b	miRNA	133	37	96	0	0	0	0
hsa-mir-1246	miRNA	22250.3	22249.2	0	1.60317	0.236111	137.891	139.731
hsa-mir-1247	miRNA	8457	5507	2949	620	1431	130	2181
hsa-mir-1248	miRNA	29383.4	28813	219.5	0	0	155	155
hsa-mir-1249	miRNA	2781	407	2374	21	24	3	48
hsa-mir-1250	miRNA	2438	2409	29	0	0	22	22
hsa-mir-1251	miRNA	1457.5	1443.5	13	0	0	1231.5	1231.5
hsa-mir-1252	miRNA	1780.7	1720.7	60	0	0	7	7
hsa-mir-1253	miRNA	21	21	0	0	0	1	1
hsa-mir-1254	miRNA	3171.65	3166.16	1.2	34.5	22.5	19.5	76.5
hsa-mir-1254-2	miRNA	3156.78	3156.16	0.02	34.5	22.5	19.5	76.5
hsa-mir-1255a	miRNA	12651.8	12244.3	400	23.0625	63	45.5	131.562
hsa-mir-1255b-1	miRNA	182.747	182.72	0.03	0.493392	0.929241	0.521739	1.94437
hsa-mir-1255b-2	miRNA	182.73	182.67	0.06	0.493392	0.929241	0.521739	1.94437
hsa-mir-1256	miRNA	1423.77	281.77	1142	0	5	8	13
hsa-mir-1257	miRNA	474	474	0	0	0	0	0
hsa-mir-1258	miRNA	892.5	8	856	0	0	0.5	0.5
hsa-mir-125a	miRNA	646316	635298	10722	21092	28084	28335	77511
hsa-mir-125b-1	miRNA	993114	976937	16001.5	6610.5	4562.33	65	11237.8
hsa-mir-125b-2	miRNA	1.00494e+06	970970	33676.8	8959.5	6166.17	118.5	15244.2
hsa-mir-126	miRNA	831145	272396	558654	1565	2434	4598.17	8597.17
hsa-mir-1260	miRNA	331.708	331.71	0	0	0	0	0
hsa-mir-1260b	miRNA	7995.01	7994.91	0.11	0.422222	3.7	0.5	4.62222
hsa-mir-1261	miRNA	26.5	26.5	0	0	0	0	0
hsa-mir-1262	miRNA	12228	12227	0	3601	2682	4	6287
hsa-mir-1263	miRNA	76	76	0	0	0	0	0
hsa-mir-1264	miRNA	76	4	72	0	0	0	0
hsa-mir-1265	miRNA	92	92	0	0	0	0	0
hsa-mir-1266	miRNA	3018	3002	13	172	103	441	716
hsa-mir-1267	miRNA	25.5912	24.5	1.07	0	0	0	0
hsa-mir-1268	miRNA	778.637	776.34	1.08	2.46212	1.39336	0.0867351	3.94221
hsa-mir-1268b	miRNA	1466.46	1440.57	0	2.46212	1.39336	0.326735	4.18221
hsa-mir-1269	miRNA	32332.5	2132.43	30160	0	0	53	53
hsa-mir-1269b	miRNA	6717.75	6717.75	0	1	0	0	1
hsa-mir-127	miRNA	408964	35700.5	373251	0	0	15	15
hsa-mir-1270-1	miRNA	5005.42	4982.42	23	0	0	0	0
hsa-mir-1270-2	miRNA	5005.42	4982.42	23	0	0	0	0
hsa-mir-1271	miRNA	16805.8	16313	492.75	0	0	1	1
hsa-mir-1272	miRNA	732	727	2	0	0	0	0
hsa-mir-1273	miRNA	64.0133	8.91	27.56	0	0	0.11	0.11
hsa-mir-1273c	miRNA	738.194	711.96	25.86	1.64	0.69	2.4931	4.8231
hsa-mir-1273d	miRNA	223.288	218.16	2.33	25.5905	21.8821	1.42476	48.8974
hsa-mir-1273f	miRNA	11.2717	1.87	5.76	0	0	0.35	0.35
hsa-mir-1273g	miRNA	6.04575	3.24	2.02	0	0	0.04	0.04
hsa-mir-1275	miRNA	3730.5	3730.5	0	3	0	0	3
hsa-mir-1276	miRNA	4371	4296	73	2133.25	469	76.25	2678.5
hsa-mir-1277	miRNA	29022.3	2274.8	26747.2	72.2313	34.6389	51.7336	158.604
hsa-mir-1278	miRNA	11600.5	272	11326.5	21	40	1	62
hsa-mir-128-1	miRNA	1.36156e+06	1565	1.35998e+06	488	218.5	967.5	1674
hsa-mir-128-2	miRNA	854150	815	853334	387	173.5	933.5	1494
hsa-mir-1280	miRNA	65.8333	65.83	0	0	0	0	0
hsa-mir-1281	miRNA	3	2	0	0	0	0	0
hsa-mir-1283-1	miRNA	635.333	632.5	0	0	0	1	1
hsa-mir-1283-2	miRNA	940.433	632.5	305	5	0	1	6
hsa-mir-1284	miRNA	946	734	212	0	0	4	4
hsa-mir-1285-1	miRNA	1788.47	14.24	1768.31	119.718	79.2667	22.3244	221.309
hsa-mir-1285-2	miRNA	719.802	0.06	719.72	94.2107	54.9539	21.6778	170.842
hsa-mir-1286	miRNA	1259	32	1226	5	0	5	10
hsa-mir-1287	miRNA	7599	6742	857	12	6	25	43
hsa-mir-1288	miRNA	135	11	124	2	6	1	9
hsa-mir-1289-1	miRNA	85.9679	35.5	49.47	0	4	0	4
hsa-mir-1289-2	miRNA	45.3012	0	45.3	0	0	0	0
hsa-mir-129-1	miRNA	23387.7	14938.3	8447.83	7.5	5.5	16	29
hsa-mir-129-2	miRNA	53984.7	14940.3	39032.8	7.5	5.5	22	35
hsa-mir-1290	miRNA	412.843	0.01	411.83	0	0	2.5	2.5
hsa-mir-1291	miRNA	9838.83	9685	71	4	22	13.6667	39.6667
uc003nsc.1_intron_10_0_chr6_30887626_f	5p tailed mirtron candidate	19.5	15	4	4	5	0	9
hsa-mir-1293	miRNA	1821	1574	133	54	199	100	353
hsa-mir-1294	miRNA	2009.67	1858.17	150	4	1	8	13
hsa-mir-1295	miRNA	2423	11	2411	0	0	1	1
hsa-mir-1296	miRNA	7973.75	6753.75	1186	5	5	22.5	32.5
hsa-mir-1297	miRNA	5	0	0	0	0	0	0
hsa-mir-1298	miRNA	1418.75	1294	116.75	0	0	6	6
hsa-mir-1299	miRNA	663.757	0.33	660.37	2.33333	10.5	0.166667	13
hsa-mir-1301	miRNA	35409.8	176	34873.8	11	4	85	100
hsa-mir-1302-1	miRNA	16.5229	0.5	16.02	0	0	0	0
hsa-mir-1302-10	miRNA	20.5657	1.5	17	0	0	0	0
hsa-mir-1302-11	miRNA	20.5657	1.5	17	0	0	0	0
hsa-mir-1302-2	miRNA	20.5657	1.5	17	0	0	0	0
hsa-mir-1302-3	miRNA	24.0657	5	17	0	0	0	0
hsa-mir-1302-4	miRNA	16.33	0.02	16.31	0	0	0	0
hsa-mir-1302-5	miRNA	16.31	0	16.31	0	0	0	0
hsa-mir-1302-6	miRNA	15.9991	0	16	0	0	0	0
hsa-mir-1302-7	miRNA	16.1108	0	16.11	0	0	0	0
hsa-mir-1302-8	miRNA	16.1419	0	16	0	0	0	0
hsa-mir-1302-9	miRNA	20.5657	1.5	17	0	0	0	0
hsa-mir-1303	miRNA	686.97	457.33	219.33	20.9222	16.5422	4.17209	41.6365
hsa-mir-1304	miRNA	6895.71	5977.79	903.41	176.974	130.898	25	332.871
hsa-mir-1305	miRNA	952.5	37	913	60	50	2	112
hsa-mir-1306	miRNA	11495	4734.5	6731.5	51	39	148	238
hsa-mir-1307	miRNA	367506	223418	143874	13259	6312	1940	21511
hsa-mir-130a	miRNA	570328	1743.25	568515	908.5	414.5	8	1331
hsa-mir-130b	miRNA	438199	16775.8	421368	719.833	335.333	5446.33	6501.5
hsa-mir-132	miRNA	60698.5	15567	44381	925	1520	141	2586
hsa-mir-1321	miRNA	1.58333	0.08	1.5	0	0	0	0
hsa-mir-1322	miRNA	31.0909	0	27.09	0	0	0	0
hsa-mir-1323	miRNA	1001	1000	0	0	0	11	11
hsa-mir-1324	miRNA	1	0	1	0	0	0	0
hsa-mir-133a-1	miRNA	12672.9	2060.83	10599.1	0	0	0	0
hsa-mir-133a-2	miRNA	12663.9	2062.83	10599.1	0	0	0	0
hsa-mir-133b	miRNA	821.583	2	819.58	0	0	0	0
hsa-mir-134	miRNA	50620	50514	103	0	0	10	10
hsa-mir-1343	miRNA	338	39.5	295.5	12	2	4	18
hsa-mir-135a-1	miRNA	11268.9	9434.5	1645.5	7	2.5	1377.25	1386.75
hsa-mir-135a-2	miRNA	18051.4	9274.5	8580	6	2.5	1450.25	1458.75
hsa-mir-135b	miRNA	73594.4	65681.1	1974	883	545	29.5	1457.5
hsa-mir-136	miRNA	35877.2	26362.2	9382	0	0	1	1
hsa-mir-137	miRNA	145702	3351	140890	0	0	1	1
hsa-mir-138-1	miRNA	115519	101404	13919	3	5	4	12
hsa-mir-138-2	miRNA	69026.2	68793.2	117	4	0	4	8
hsa-mir-139	miRNA	181906	77346	104200	167	97	8	272
hsa-mir-140	miRNA	9.56159e+06	79385	9481839	51005	47283	3355	101643
hsa-mir-141	miRNA	926677	6783.67	915661	351	273	13527	14151
hsa-mir-142	miRNA	2.10485e+06	1.6398e+06	464226	50	19	45.5	114.5
hsa-mir-143	miRNA	5.86026e+06	126370	5732989	160	91	2370	2621
hsa-mir-144	miRNA	141411	50003	91389.5	0	3	15	18
hsa-mir-145	miRNA	1.77834e+06	1.71827e+06	59171.3	0	0	1	1
hsa-mir-1468	miRNA	1145.5	1135	10.5	15	3	24	42
hsa-mir-1469	miRNA	1	1	0	0	0	0	0
hsa-mir-146a	miRNA	734481	733355	911.17	69	34	10.25	113.25
hsa-mir-146b	miRNA	1.37056e+06	1.36401e+06	6016.5	6437	4606	3741.25	14784.2
hsa-mir-147	miRNA	7	0	7	0	0	0	0
hsa-mir-147b	miRNA	7732.75	267.75	7463	0	0	8	8
hsa-mir-148a	miRNA	2.91608e+06	22886	2.8929e+06	8917	8807	13964	31688
hsa-mir-148b	miRNA	796900	45588.5	751170	26779.5	17794	7298	51871.5
hsa-mir-149	miRNA	25804.7	25001.7	678.25	396	251	155.583	802.583
hsa-mir-150	miRNA	168176	146702	21445.5	0	3.5	1	4.5
hsa-mir-151	miRNA	1.0498e+06	117833	931896	124679	121048	40005.5	285732
hsa-mir-151b	miRNA	10764.9	0	10764.9	65.9111	81.6897	57.5733	205.174
hsa-mir-152	miRNA	678776	376.67	678384	190	96	1026.5	1312.5
hsa-mir-153-1	miRNA	15309.2	226	14017.8	0	1	7	8
hsa-mir-153-2	miRNA	15536.8	399.5	14017.8	0	1	3	4
hsa-mir-1537	miRNA	1218	117	1101	0	0	0	0
hsa-mir-1538	miRNA	194	73	23	0	0	0	0
hsa-mir-1539	miRNA	5	2	3	0	0	0	0
hsa-mir-154	miRNA	15371	6298	9072	0	0	0	0
hsa-mir-155	miRNA	387154	385645	1171	0	0	85	85
hsa-mir-1587	miRNA	29.2	26	0	0	0	0	0
hsa-mir-15a	miRNA	789066	781318	2124	1975.5	1242.5	1096.5	4314.5
hsa-mir-15b	miRNA	761411	731376	28711.5	1068	648	1783.5	3499.5
hsa-mir-16-1	miRNA	1.82797e+06	1792175	5734	4203.5	2450	4010.5	10664
hsa-mir-16-2	miRNA	1.85351e+06	1790892	32883.5	4343.5	2573	4442	11358.5
hsa-mir-17	miRNA	2.8956e+06	2.5808e+06	313147	33876	21560	1349.25	56785.2
hsa-mir-181a-1	miRNA	1254862	1206220	48247	9857.5	3954.5	7146.5	20958.5
hsa-mir-181a-2	miRNA	1.24806e+06	1206206	41197	11119.5	4033.5	7104.5	22257.5
hsa-mir-181b-1	miRNA	421784	415149	6445.5	12299	5526.5	7984.5	25810
hsa-mir-181b-2	miRNA	519843	518994	695.92	12259	5507.5	8001.5	25768
hsa-mir-181c	miRNA	73558	60033	13496	268	245	182	695
hsa-mir-181d	miRNA	221590	221251	235	1585	1491	594	3670
hsa-mir-182	miRNA	1.75278e+06	1.74297e+06	1220.5	312156	287648	734338	1334142
hsa-mir-1825	miRNA	4	2.67	1	0	0	0	0
hsa-mir-1827	miRNA	2118.5	0	2118.5	14	4	156	174
hsa-mir-183	miRNA	995551	983794	9701	200726	151030	291520	643276
hsa-mir-184	miRNA	119991	5060	114800	59	66	543	668
hsa-mir-185	miRNA	1.91675e+06	1904610	12073.4	996	461	810.5	2267.5
hsa-mir-186	miRNA	1.34215e+06	1.33114e+06	7269.92	114365	160197	864.25	275426
hsa-mir-187	miRNA	22422.5	365	22052	0	0	1	1
hsa-mir-188	miRNA	13964.5	12692	1269	456	184	88	728
hsa-mir-18a	miRNA	706464	669672	35684	3117	2273.5	281.5	5672
hsa-mir-18b	miRNA	22876	22547	285	7	4.5	8.5	20
hsa-mir-190	miRNA	21773.8	20599.8	1136.5	75	24	43	142
hsa-mir-1908	miRNA	2430.83	2259	171.5	3	1	146	150
hsa-mir-190b	miRNA	19516.8	19250	251.83	4	69	18	91
hsa-mir-191	miRNA	5.62677e+06	5621103	4923	70616.5	70436.5	21300	162353
hsa-mir-1910	miRNA	404.607	142	260.61	20.5	2	35.6667	58.1667
hsa-mir-1911	miRNA	134	129	5	0	0	78	78
hsa-mir-1912	miRNA	659	530	129	0	0	1	1
hsa-mir-1913	miRNA	117.5	94.5	23	0	0	3	3
hsa-mir-1914	miRNA	331.5	63.5	265	4	16	5	25
hsa-mir-1915	miRNA	233.5	87	146	22	9	26	57
hsa-mir-192	miRNA	1.93703e+07	1.93682e+07	1684.5	20005.5	16945.3	9982.83	46933.7
hsa-mir-193a	miRNA	318194	95968	221679	1513.67	1144.33	189	2847
hsa-mir-193b	miRNA	278950	83109	195790	1660	1610	604	3874
hsa-mir-194-1	miRNA	53243.3	53200.8	40	815	338	149.5	1302.5
hsa-mir-194-2	miRNA	166633	163407	3151	957.5	363	191.5	1512
hsa-mir-195	miRNA	370563	370134	408	109	67	1046.46	1222.46
hsa-mir-196a-1	miRNA	586396	586123	223	98902.4	112095	1592.5	212590
hsa-mir-196a-2	miRNA	681636	676786	4166.33	104881	116390	1664.5	222936
hsa-mir-196b	miRNA	444784	440329	4069	11273.5	10608	673.5	22555
hsa-mir-197	miRNA	56787.2	2437	54339.2	3703.5	2286	249.5	6239
hsa-mir-1972-1	miRNA	6.61939	2.56	0.85	0	0	0	0
hsa-mir-1972-2	miRNA	6.61939	2.56	0.85	0	0	0	0
hsa-mir-1973	miRNA	89.9081	0	89.26	0	0	0.111111	0.111111
uc001gwu.2_intron_17_0_chr1_201777739_f	3p tailed mirtron	20.5	17.5	1	2	0	0	2
hsa-mir-198	miRNA	7	7	0	0	0	0	0
hsa-mir-199a-1	miRNA	5.25066e+06	254222	4.99622e+06	4.83333	5.33333	6.66667	16.8333
hsa-mir-199a-2	miRNA	5.25097e+06	253936	4.99674e+06	4.83333	5.33333	6.66667	16.8333
hsa-mir-199b	miRNA	5.35456e+06	358178	4.99622e+06	3.33333	5.33333	18.6667	27.3333
hsa-mir-19a	miRNA	605007	5554.5	594834	469	156	520.5	1145.5
hsa-mir-19b-1	miRNA	656817	19874.5	635665	483	140	485	1108
hsa-mir-19b-2	miRNA	646240	168.5	644635	471	138	486	1095
hsa-mir-200a	miRNA	407068	3893	401912	0	0	1410	1410
hsa-mir-200b	miRNA	480342	19166.5	460570	4	3	11390.5	11397.5
hsa-mir-200c	miRNA	1161721	1590.5	1159291	2004	2393	275897	280294
hsa-mir-202	miRNA	7565	7214	349	0	0	1	1
hsa-mir-203	miRNA	253633	1267.67	252199	17504.5	11690	48883.8	78078.3
hsa-mir-204	miRNA	27311	24797	2200.53	0	0	0	0
hsa-mir-205	miRNA	614646	610690	3236.5	1	1	41	43
hsa-mir-206	miRNA	6593.33	0	6593.33	2	0	6	8
hsa-mir-208a	miRNA	10429	420	9954	0	0	0	0
hsa-mir-208b	miRNA	96	1	95	0	1	0	1
hsa-mir-20a	miRNA	1745503	1714086	28590.5	29390	27201.5	2044	58635.5
hsa-mir-20b	miRNA	29803.3	23381.3	6415	0	0	3	3
hsa-mir-21	miRNA	4.88944e+07	4.86789e+07	190927	1.07159e+06	1.98809e+06	2612928	5672610
hsa-mir-210	miRNA	175498	713.17	174640	127	278	1029	1434
hsa-mir-211	miRNA	49198.5	47633.2	1394.33	0	0	0	0
hsa-mir-2110	miRNA	27129	26478	541	79	116	82	277
hsa-mir-2113	miRNA	25	3	21	0	0	0	0
hsa-mir-2114	miRNA	1205	974	228	0	0	1	1
hsa-mir-2115	miRNA	1368.5	685	683	0	0	0	0
hsa-mir-2116	miRNA	706.333	248	455.33	7	2	2	11
hsa-mir-2117	miRNA	15	14	1	0	0	0	0
hsa-mir-212	miRNA	30033.3	20688.3	9340	13	32	6	51
hsa-mir-214	miRNA	156265	8743.5	146890	0	0	6	6
hsa-mir-215	miRNA	62389.5	62358.5	31	1238.5	423.833	109.833	1772.17
hsa-mir-216a	miRNA	102398	95938	6247	13	6	0	19
hsa-mir-216b	miRNA	4630.5	4592	16.5	17	18	1	36
hsa-mir-217	miRNA	42873	39922	2947	45	12	8	65
hsa-mir-218-1	miRNA	119776	112959	6218	0	0	20	20
hsa-mir-218-2	miRNA	106836	106235	371	0	0	18	18
hsa-mir-219-1	miRNA	12152.8	9204.5	2882	322	258	50.5	630.5
hsa-mir-219-2	miRNA	275618	16681.5	258834	0	0	1.5	1.5
hsa-mir-22	miRNA	2187633	75585	2.11192e+06	527	773	299	1599
hsa-mir-221	miRNA	3.94871e+06	444173	3500974	2161.5	2062	275	4498.5
hsa-mir-222	miRNA	2.40705e+06	6678.5	2.39735e+06	1725.5	703.75	47.5	2476.75
hsa-mir-223	miRNA	236953	27187	208841	5	0	0	5
hsa-mir-224	miRNA	183183	176200	6787	8891	7236	4	16131
hsa-mir-2276	miRNA	778	73	704	143	40	204	387
hsa-mir-2277	miRNA	1911.5	1569	336	5	5	5	15
hsa-mir-2278	miRNA	854.167	785.67	60	1	2	14	17
hsa-mir-2355	miRNA	5443.67	3362	2075.5	18	35	21	74
hsa-mir-2392	miRNA	74	0	74	0	0	0	0
hsa-mir-23a	miRNA	2.33687e+06	5348	2329918	7467.33	5789.17	11109.2	24365.8
hsa-mir-23b	miRNA	1.25442e+06	67633.5	1.1861e+06	2296	1049	5915.5	9260.5
hsa-mir-23c	miRNA	9203	0	9203	137	97	28	262
hsa-mir-24-1	miRNA	1.94465e+06	5669	1938716	92043	78802	9435.67	180281
hsa-mir-24-2	miRNA	1.98237e+06	44375	1937596	98983	80004	9459.67	188447
hsa-mir-2467	miRNA	377.5	197	180.5	1	0	2	3
hsa-mir-25	miRNA	2878278	234423	2643746	8410	10490	37454	56354
hsa-mir-2681	miRNA	275	89	186	0	0	0	0
hsa-mir-2682	miRNA	6591	6504	81	0	0	0	0
hsa-mir-26a-1	miRNA	3.02742e+06	3.02567e+06	663	2216.5	2004	10217.3	14437.8
hsa-mir-26a-2	miRNA	3.03688e+06	3.03304e+06	2707.33	2208.5	2004	10226.3	14438.8
hsa-mir-26b	miRNA	2335629	2333184	2105	1390	1342	3577	6309
hsa-mir-27a	miRNA	2.31391e+06	29778	2.28357e+06	38781	66709	8542	114032
hsa-mir-27b	miRNA	1.81018e+06	51598	1.75831e+06	41648	28261	18143.7	88052.7
hsa-mir-28	miRNA	501230	148845	352261	35583.7	31066.3	3950.72	70600.8
hsa-mir-2861	miRNA	5.33333	1	3.33	0	0	0	0
hsa-mir-296	miRNA	19287.3	6022	13259.3	1617.33	2839.5	162.333	4619.17
hsa-mir-2964a	miRNA	1396.5	612	783.5	0	0	2.5	2.5
hsa-mir-297	miRNA	4.74359	4.67	0	0	0	0	0
hsa-mir-298	miRNA	7	0	7	0	0	0	0
hsa-mir-299	miRNA	11229	7579	3647	0	0	0	0
hsa-mir-29a	miRNA	1.06104e+07	23889.2	10585422	4275	3834	861	8970
hsa-mir-29b-1	miRNA	563340	6599	555681	1411	499	355.667	2265.67
hsa-mir-29b-2	miRNA	588646	8082	579773	1349	316	361.333	2026.33
hsa-mir-29c	miRNA	1.2467e+06	26205	1.22005e+06	66	53	254.667	373.667
hsa-mir-300	miRNA	1	0	1	0	0	0	0
hsa-mir-301a	miRNA	154320	9434.5	144633	182	36	4257.5	4475.5
hsa-mir-301b	miRNA	50276.2	271	49955.5	34	12	354	400
hsa-mir-302a	miRNA	3142.2	348	2794.2	0	0	0	0
hsa-mir-302b	miRNA	19811.2	3	19807.2	0	0	2	2
hsa-mir-302c	miRNA	5580.7	5	5575.7	0	0	0	0
hsa-mir-302d	miRNA	18770.7	0.5	18770.2	0	0	1	1
hsa-mir-302e	miRNA	4	0	0	0	0	0	0
uc010yel.1_intron_9_0_chr19_54650394_f.3p	5p tailed mirtron candidate	21.1429	2	17	2	0	1	3
hsa-mir-3065	miRNA	28703.8	25371.8	3252	61	33	224	318
hsa-mir-3074	miRNA	1349	461	887	48	29	8.5	85.5
hsa-mir-30a	miRNA	9299239	8288086	1.00803e+06	1441598	1.71305e+06	23182.5	3177830
hsa-mir-30b	miRNA	369660	344585	24988.8	1098.75	605	605.083	2308.83
hsa-mir-30c-1	miRNA	294930	281389	12784	16739.8	8309	513.917	25562.7
hsa-mir-30c-2	miRNA	391647	283098	107661	21066.8	12398.5	584.083	34049.3
hsa-mir-30d	miRNA	4823027	4813493	7291.5	459588	367324	100992	927904
hsa-mir-30e	miRNA	1.89712e+06	1188332	704388	123764	103962	18635	246360
hsa-mir-31	miRNA	318542	309853	8637	20098.5	5382.5	35	25516
hsa-mir-3115	miRNA	574	568	3	4	2	2	8
hsa-mir-3116-1	miRNA	142.811	26.5	116.31	0.109091	1.24747	0	1.35657
hsa-mir-3116-2	miRNA	120.811	4.5	116.31	0.109091	1.24747	0	1.35657
hsa-mir-3117	miRNA	2149.5	18.5	2130	0	0	0	0
hsa-mir-3118-1	miRNA	38.55	0	38.55	0	0	0	0
hsa-mir-3118-2	miRNA	38.55	0	38.55	0	0	0	0
hsa-mir-3118-3	miRNA	38.55	0	38.55	0	0	0	0
hsa-mir-3118-4	miRNA	35.9667	0	35.97	0	0	0	0
hsa-mir-3118-5	miRNA	38.2167	0	38.22	0	0	0	0
hsa-mir-3118-6	miRNA	35.9667	0	35.97	0	0	0	0
hsa-mir-3119-1	miRNA	13.5	13.5	0	0	0	0	0
hsa-mir-3119-2	miRNA	19.5	18.5	0	0	0	0	0
hsa-mir-3120	miRNA	876.5	25	844.5	8	0	0	8
hsa-mir-3121	miRNA	950.5	13	937.5	45	18	1	64
hsa-mir-3122	miRNA	254	253	0	90	24	0	114
hsa-mir-3124	miRNA	1629	1599	20	1	4	8	13
hsa-mir-3125	miRNA	100	100	0	0	0	0	0
hsa-mir-3126	miRNA	916.833	785.83	131	145	52	1	198
hsa-mir-3127	miRNA	4548.53	4426	121	698.333	698	110.5	1506.83
hsa-mir-3128	miRNA	375	364	11	0	1	4	5
hsa-mir-3129	miRNA	2356	1465	886	284	277	0	561
hsa-mir-3130-1	miRNA	1261.59	286.5	974.09	3.5	7	1	11.5
hsa-mir-3130-2	miRNA	1326.59	351.5	974.09	3.5	10	1	14.5
hsa-mir-3131	miRNA	990	988	0	71	28	13	112
hsa-mir-3132	miRNA	53.5	47.5	0	2	1	0	3
hsa-mir-3133	miRNA	66.1192	64.79	1.32	0	0	0.125	0.125
hsa-mir-3134	miRNA	75.0792	0.03	75.05	1	0	0	1
hsa-mir-3135	miRNA	329.88	329.5	0.17	0	0	0.01	0.01
hsa-mir-3135b	miRNA	12.97	12.5	0.23	0	0	0.01	0.01
hsa-mir-3136	miRNA	971	946	23	2	2	4	8
hsa-mir-3137	miRNA	75	75	0	1	1	2	4
hsa-mir-3138	miRNA	1809.17	30	1561.17	33	15	5.5	53.5
hsa-mir-3139	miRNA	479.5	475.5	4	0	3	2	5
hsa-mir-3140	miRNA	1945.93	195	1747.93	70.6667	80	6	156.667
hsa-mir-3141	miRNA	66.9873	66.99	0	0	0	0	0
hsa-mir-3142	miRNA	12	5.33	0	0	0	0	0
hsa-mir-3143	miRNA	1541.5	1492	19.5	0	0	0	0
hsa-mir-3144	miRNA	2657.5	1744.5	913	0	0	5	5
hsa-mir-3145	miRNA	448.333	75.33	373	0	0	1	1
hsa-mir-3146	miRNA	755	4	751	108	24	2	134
hsa-mir-3147	miRNA	90.2	90.2	0	0	0	0	0
hsa-mir-3148	miRNA	94	94	0	0	0	2	2
hsa-mir-3149	miRNA	467.67	0	467.5	17	5	14	36
hsa-mir-3150a	miRNA	559	364	161	19	7	6	32
hsa-mir-3150b	miRNA	6533	53	6458	0	0	8	8
hsa-mir-3151	miRNA	248	248	0	0	0	0	0
hsa-mir-3152	miRNA	149	75	74	11	10	0	21
hsa-mir-3153	miRNA	153	0.5	148	5	0	0	5
hsa-mir-3154	miRNA	749.25	0	745.25	0	0	0	0
hsa-mir-3155	miRNA	376.611	221	151.61	5.5	6.5	0	12
hsa-mir-3156-1	miRNA	69.2421	57.35	7.31	0	0	0.97619	0.97619
hsa-mir-3156-2	miRNA	69.2421	57.35	7.31	0	0	0.97619	0.97619
hsa-mir-3156-3	miRNA	61.9325	57.35	0	0	0	0.809524	0.809524
hsa-mir-3157	miRNA	1109	984	123	0	0	1	1
hsa-mir-3158-1	miRNA	4117.5	567.83	3533.17	91	128.5	41.3333	260.833
hsa-mir-3158-2	miRNA	3869.5	320.83	3531.17	91	128.5	42.3333	261.833
hsa-mir-3159	miRNA	372.82	362	6.72	0	0	0.23	0.23
hsa-mir-3160-1	miRNA	226.679	3.5	216.68	0	0	0.5	0.5
hsa-mir-3160-2	miRNA	226.679	3.5	217.68	0	0	0.5	0.5
hsa-mir-3161	miRNA	169.75	161.75	7	0	0	6.25	6.25
hsa-mir-3162	miRNA	341.25	335.25	6	6	2	0	8
hsa-mir-3163	miRNA	735.707	735.67	0.04	29	65	0	94
hsa-mir-3164	miRNA	1354.53	1343.53	11	30.5	20	4	54.5
hsa-mir-3165	miRNA	437.5	413.5	23	0	0	0	0
hsa-mir-3166	miRNA	75	32	35	0	0	0	0
hsa-mir-3167	miRNA	172	3	164	0	0	0	0
hsa-mir-3168	miRNA	243.5	242.5	0	0	0	0	0
hsa-mir-3169	miRNA	12	12	0	0	0	0	0
hsa-mir-3170	miRNA	297	290	4	16	9	4	29
hsa-mir-3171	miRNA	1248.5	1175	72.5	0	0	0	0
hsa-mir-3173	miRNA	1327.33	372.5	954.83	8	0	19	27
hsa-mir-3174	miRNA	1137.5	1088	49.5	8	11	20	39
hsa-mir-3175	miRNA	546	521	16	30	16	11	57
hsa-mir-3176	miRNA	4114.3	3	4106.8	465.4	286.4	241.4	993.2
hsa-mir-3177	miRNA	1339.5	36	1299.5	106	64	137.5	307.5
hsa-mir-3178	miRNA	14	8	0	0	0	0	0
hsa-mir-3179-1	miRNA	512.167	13	496.5	0.333333	0	1.25	1.58333
hsa-mir-3179-2	miRNA	512.167	13	496.5	0.333333	0	1.25	1.58333
hsa-mir-3179-3	miRNA	512.167	13	496.5	0.333333	0	1.25	1.58333
hsa-mir-3180-1	miRNA	1877.8	88.8	1787.2	2.6	1.8	1.2	5.6
hsa-mir-3180-2	miRNA	1876.8	88.8	1787.2	2.6	1.8	1.2	5.6
hsa-mir-3180-3	miRNA	1877.8	88.8	1787.2	2.6	1.8	1.2	5.6
hsa-mir-3180-4	miRNA	1794.7	1788.7	2	2.6	1.8	1.2	5.6
hsa-mir-3180-5	miRNA	1791.95	1788.7	0.25	2.6	1.8	1.2	5.6
hsa-mir-3181	miRNA	161	153	8	7	0	0	7
hsa-mir-3182	miRNA	1	1	0	0	0	0	0
hsa-mir-3183	miRNA	275	271	3	0	0	2	2
hsa-mir-3184	miRNA	191	163	26	9	4	0	13
hsa-mir-3185	miRNA	19	19	0	0	0	0	0
hsa-mir-3186	miRNA	81	30	51	0	0	0	0
hsa-mir-3187	miRNA	1653	134	1519	16	7	16	39
hsa-mir-3188	miRNA	914.5	5	665	32	17	5	54
hsa-mir-3189	miRNA	175	34	141	26	0	1	27
hsa-mir-3190	miRNA	2400	18	2193	11	16	11	38
hsa-mir-3191	miRNA	250	14	202	6	12	1	19
hsa-mir-3192	miRNA	1454	1453	1	32	37	10	79
hsa-mir-3193	miRNA	506	479	1	8	19	2	29
hsa-mir-3194	miRNA	539.25	380.5	152.75	7	0	13.5	20.5
hsa-mir-3195	miRNA	36.4667	32.5	1	0	0	0	0
hsa-mir-3196	miRNA	6.64785	6.58	0	0	0	1.79167	1.79167
hsa-mir-3197	miRNA	421	412	1	68	54	0	122
hsa-mir-3198-1	miRNA	321.583	7.5	306.33	64	12.5	3	79.5
hsa-mir-3198-2	miRNA	326.583	7.5	306.33	64	12.5	3	79.5
hsa-mir-3199-1	miRNA	428	170.5	110.33	5	0	5	10
hsa-mir-3199-2	miRNA	703.5	229.5	110.33	5	0	5	10
hsa-mir-32	miRNA	119978	113996	5573.5	1477	259	891	2627
hsa-mir-3200	miRNA	7360	3330	4030	40	11	67	118
hsa-mir-3202-1	miRNA	832	712.5	10.5	0	0	0	0
hsa-mir-3202-2	miRNA	556	436.5	10.5	0	0	0	0
hsa-mir-320a	miRNA	4.70382e+06	176.5	4.70159e+06	7258.32	10379.9	2002.07	19640.3
hsa-mir-320b-1	miRNA	114649	114645	0	141.325	252.414	339.072	732.811
hsa-mir-320b-2	miRNA	116145	0	116130	141.325	252.414	339.072	732.811
hsa-mir-320c-1	miRNA	48401.4	0	48401.4	164.492	274.081	268.739	707.311
hsa-mir-320c-2	miRNA	49708.7	0	49708.7	128.492	230.081	268.739	627.311
hsa-mir-320d-1	miRNA	11397.3	0	11397.3	76.4583	196.181	219.139	491.778
hsa-mir-320d-2	miRNA	11346.4	0	11346.4	75.4583	186.181	218.139	479.778
hsa-mir-320e	miRNA	3808.06	0	3808.06	2.66667	19.5556	3.88889	26.1111
hsa-mir-323	miRNA	61501	1194	60306	0	0	1	1
hsa-mir-323b	miRNA	14448	35	14413	0	0	0	0
hsa-mir-324	miRNA	110240	73700	36450.6	822.5	491.5	513.5	1827.5
hsa-mir-325	miRNA	1.1	0	1	0	0	0	0
hsa-mir-326	miRNA	7051.83	179.5	23	0	0	0	0
hsa-mir-328	miRNA	11636.9	54.5	11571.4	7	5	26	38
hsa-mir-329-1	miRNA	4113.26	595.26	3516.5	0	0	0	0
hsa-mir-329-2	miRNA	4112.26	595.26	3516.5	0	0	0	0
hsa-mir-330	miRNA	290044	6076.87	283928	1881	535.5	355.933	2772.43
hsa-mir-331	miRNA	182273	5676	172690	249	212	599	1060
hsa-mir-335	miRNA	262489	249770	12653.3	704.5	260	1209.5	2174
hsa-mir-337	miRNA	7011.33	1914	5075.33	0	0	5	5
hsa-mir-338	miRNA	34196.2	5385	28570.3	8	0	152	160
hsa-mir-339	miRNA	96221.2	28708.3	67464	738.083	677.667	1063.54	2479.29
hsa-mir-33a	miRNA	307358	297877	8281.5	1276	624	189.5	2089.5
hsa-mir-33b	miRNA	44529.5	42130	2129	1020	1001.5	255	2276.5
hsa-mir-340	miRNA	834598	830913	3486.5	377.333	224	1423.83	2025.17
hsa-mir-342	miRNA	517262	41969	473909	26748	4924	32420	64092
hsa-mir-345	miRNA	100680	99771.6	887	375	154	2746.08	3275.08
hsa-mir-346	miRNA	1123	1053	32	0	0	0	0
hsa-mir-34a	miRNA	166594	156466	8538	283	171	149	603
hsa-mir-34b	miRNA	13251.8	10481	2760	0	0	0	0
hsa-mir-34c	miRNA	311657	309570	2032	173	4	9	186
hsa-mir-3529	miRNA	717	717	0	0	0	3	3
hsa-mir-3545	miRNA	569.833	18	550.83	6	0	24	30
hsa-mir-3591	miRNA	18225	16767	1456	0	0	0	0
uc010mih.1_intron_14_0_chr9_15728035_f.3p	5p tailed mirtron candidate	22	5	17	0	0	0	0
uc001tob.2_intron_50_0_chr12_109703086_f	mirtron candidate	23	6	17	3	0	0	3
hsa-mir-3607	miRNA	26350.8	23366	1817	0	0	1	1
hsa-mir-3609	miRNA	3594.75	0	3588.75	0	0	51	51
hsa-mir-361	miRNA	202921	164825	37922	1091	784	899.936	2774.94
hsa-mir-3610	miRNA	448	1	342	0	0	1	1
hsa-mir-3611	miRNA	1595.2	186.72	1408.48	4	3	5	12
hsa-mir-3612	miRNA	237	138	99	0	0	0	0
hsa-mir-3613	miRNA	11407.1	8858.71	2449.53	37.5	47	283.762	368.262
hsa-mir-3614	miRNA	2853.17	1390	1439.17	3	19	193	215
hsa-mir-3615	miRNA	14483	46	14283.5	753	757	194	1704
hsa-mir-3616	miRNA	302.5	43.5	215	0	0	2	2
hsa-mir-3617	miRNA	229.5	217	12	0	0	1	1
hsa-mir-3618	miRNA	266.333	198	37	18	0	0	18
hsa-mir-3619	miRNA	1096.27	375.77	719.5	234.5	240	153.1	627.6
hsa-mir-362	miRNA	39623	27342	12226	349	157	77	583
uc003bdd.2_intron_4_0_chr22_43206951_r.3p	5p tailed mirtron candidate	25	15	9	0	0	0	0
hsa-mir-3621	miRNA	8	4	0	0	0	0	0
hsa-mir-3622a	miRNA	724.5	679.5	45	42.5	20.5	0	63
hsa-mir-3622b	miRNA	63	18	29	0	4	0	4
hsa-mir-363	miRNA	204934	5596.5	199305	0	0	9	9
hsa-mir-3646	miRNA	48	3	43	14	20	0	34
hsa-mir-3647	miRNA	27375.6	22210.7	2029.35	0	0	7	7
hsa-mir-3648	miRNA	2689.34	353	179	0	0	15	15
hsa-mir-3649	miRNA	2	1	1	0	0	0	0
hsa-mir-365-1	miRNA	109049	27272	81760.4	1808	1922	1976	5706
hsa-mir-365-2	miRNA	106920	24717.5	81763.4	4173	749	1999	6921
hsa-mir-3650	miRNA	4	2	2	0	0	0	0
hsa-mir-3651	miRNA	267	32	154	0	0	2	2
hsa-mir-3652	miRNA	335.992	94.5	107.37	0	0	9	9
hsa-mir-3653	miRNA	4978.04	2488.67	1661	0	0.5	4	4.5
hsa-mir-3654	miRNA	246.976	1.58	216.68	0	0	1.66667	1.66667
hsa-mir-3655	miRNA	285	126	16	0	0	3	3
hsa-mir-3656	miRNA	1322.33	1	1321.33	0	0	87	87
hsa-mir-3657	miRNA	545.639	83.44	461	0	0	0	0
hsa-mir-3658	miRNA	3.33333	2	0	0	0	0	0
hsa-mir-3659	miRNA	311	0	311	0	2	5	7
hsa-mir-3660	miRNA	2169	11	2155	30	9	4	43
hsa-mir-3661	miRNA	386	378	6	12	29	16	57
hsa-mir-3662	miRNA	2008.5	0	2008.5	0	0	0	0
hsa-mir-3663	miRNA	90	39	51	0	0	1	1
hsa-mir-3664	miRNA	2322.08	179	2139.58	0	0	80.25	80.25
hsa-mir-3665	miRNA	7.98812	3.04	0	0	0	0	0
hsa-mir-3667	miRNA	454	399	54	45	11	0	56
hsa-mir-3668	miRNA	51	51	0	0	0	0	0
hsa-mir-3669	miRNA	0.519129	0	0.23	0	0	0	0
hsa-mir-367	miRNA	13	0	13	0	0	0	0
hsa-mir-3670	miRNA	0.75	0	0.75	0	0	0	0
hsa-mir-3671	miRNA	3	0	3	0	0	0	0
hsa-mir-3672	miRNA	122	122	0	0	0	1	1
hsa-mir-3673	miRNA	3.17857	0.39	0	0	0	0	0
hsa-mir-3674	miRNA	0.419573	0.4	0	0	0	0	0
hsa-mir-3675	miRNA	55.7333	52	2.73	0	0	0	0
hsa-mir-3676	miRNA	31334.8	6554.53	5181	0	0	7.54444	7.54444
hsa-mir-3677	miRNA	954.667	209	744.17	12.5	12	13	37.5
hsa-mir-3678	miRNA	167.5	17	138	0	0	1.5	1.5
hsa-mir-3679	miRNA	1486.5	1459	26	22.5	0.75	6.25	29.5
hsa-mir-3680	miRNA	187.333	130	53.33	5.66667	14.6667	4	24.3333
hsa-mir-3681	miRNA	378	340	38	0	2	0	2
hsa-mir-3682	miRNA	750	8	735	89	109	5	203
hsa-mir-3683	miRNA	20	20	0	0	0	0	0
hsa-mir-3684	miRNA	312	2	303	12	7	0	19
hsa-mir-3685	miRNA	79	76	0	10	1	0	11
hsa-mir-3686	miRNA	23	1	22	0	0	0	0
hsa-mir-3687	miRNA	3236.75	202.25	2436	0	0	32	32
hsa-mir-3688-1	miRNA	229.01	11.5	217.5	23	13.5	1	37.5
hsa-mir-3688-2	miRNA	196	15.5	179.5	23	13.5	1	37.5
hsa-mir-3689a	miRNA	936.663	911.67	14.63	0	0	0	0
hsa-mir-3689b	miRNA	935.498	911.67	21	0	0	0	0
hsa-mir-3689c	miRNA	68.9615	0	21	0	0	0	0
hsa-mir-3689d-1	miRNA	3	3	0	0	0	0	0
hsa-mir-3689d-2	miRNA	4	3	1	0	0	0	0
hsa-mir-3689e	miRNA	914.167	911.67	0	0	0	0	0
hsa-mir-3689f	miRNA	334	332	0	0	0	0	0
hsa-mir-369	miRNA	24210	7637	16565	0	0	3	3
hsa-mir-3690	miRNA	579.5	578.25	1.25	0	0	0	0
hsa-mir-3691	miRNA	4439	4200	122	670	585	95	1350
hsa-mir-3692	miRNA	223	109	114	36	23	0	59
hsa-mir-370	miRNA	9026.83	425.33	8600.5	0	0	0	0
hsa-mir-371	miRNA	1403	1235	168	0	0	1	1
hsa-mir-371b	miRNA	123	116	7	1	0	0	1
hsa-mir-372	miRNA	2334	11	2323	9	0	0	9
hsa-mir-373	miRNA	1208	5	1203	0	0	0	0
hsa-mir-374a	miRNA	453636	276370	176632	9100.67	5742.83	5490.33	20333.8
hsa-mir-374b	miRNA	336619	326222	10261.8	743.667	768	1039.5	2551.17
hsa-mir-374c	miRNA	805.917	672.58	133.33	0	0	4.83333	4.83333
hsa-mir-375	miRNA	547170	1516	545603	16	22	9290	9328
hsa-mir-376a-1	miRNA	3637.12	1253	2375.12	0	0	1	1
hsa-mir-376a-2	miRNA	2730.62	355.5	2375.12	0	0	0	0
hsa-mir-376b	miRNA	9502.37	512.5	8966.87	0	0	3	3
hsa-mir-376c	miRNA	46470	568.5	45894.5	0	0	3	3
hsa-mir-377	miRNA	15777.8	5526	10248.3	0	0	0	0
hsa-mir-378	miRNA	7.10834e+06	8350.17	7.09997e+06	1.64623e+06	1.92766e+06	220640	3.79453e+06
hsa-mir-378b	miRNA	84397.6	0	84397.6	21077	32913	3366.67	57356.7
hsa-mir-378c	miRNA	98673.7	98673.7	0	3987.55	5517.15	1082.62	10587.3
hsa-mir-378d-1	miRNA	23856.6	0	23856.6	2473.37	3486.49	248.153	6208.01
hsa-mir-378d-2	miRNA	23886.6	23884.6	0	2196.28	3225.51	241.692	5663.48
hsa-mir-378e	miRNA	4302.07	0	4302.07	803.5	1207.15	114.235	2124.88
hsa-mir-378f	miRNA	4123.01	0	4123.01	479.392	597.258	105.792	1182.44
hsa-mir-378g	miRNA	5145.54	5145.54	0	1226.85	1206.05	229.25	2662.15
hsa-mir-378h	miRNA	3761.33	3761.33	0	311	754	273.5	1338.5
hsa-mir-378i	miRNA	2101.42	2100.92	0	482.417	572.542	281.5	1336.46
hsa-mir-379	miRNA	70029	69173	854	6	16	6	28
hsa-mir-380	miRNA	1767	1014	750	0	0	0	0
hsa-mir-381	miRNA	7447.5	839	6596.5	0	0	2	2
hsa-mir-382	miRNA	105352	45452	59898	0	0	7	7
hsa-mir-383	miRNA	62997.5	62875	15	0	0	0	0
hsa-mir-384	miRNA	4	0	0	0	0	0	0
hsa-mir-3907	miRNA	35	1	33	0	0	0	0
hsa-mir-3908	miRNA	95.08	94	0.84	0	0	0	0
hsa-mir-3909	miRNA	2623	391	2227	5	1	1	7
hsa-mir-3910-1	miRNA	716.458	2.5	713.96	3.5	0	0	3.5
hsa-mir-3910-2	miRNA	716.458	2.5	713.96	3.5	0	0	3.5
hsa-mir-3911	miRNA	1148.5	1112.5	0	150.5	141	17.5	309
hsa-mir-3912	miRNA	2178.5	108.5	1941	29	29	15	73
hsa-mir-3913-1	miRNA	709.917	558.83	71.67	6	6	5	17
hsa-mir-3913-2	miRNA	698.917	558.83	71.67	6	6	5	17
hsa-mir-3914-1	miRNA	23	2.5	17.5	0	0	0	0
hsa-mir-3914-2	miRNA	20	2.5	17.5	0	0	0	0
hsa-mir-3915	miRNA	40	39	1	0	0	0	0
hsa-mir-3916	miRNA	798.455	727.35	9.33	0	0	0	0
hsa-mir-3917	miRNA	1514	2	1132	0	0	0	0
hsa-mir-3918	miRNA	213	193	19	0	0	3	3
hsa-mir-3919	miRNA	187	13	174	0	0	0	0
hsa-mir-3920	miRNA	4	2	2	0	0	1	1
hsa-mir-3921	miRNA	12	3	9	0	0	0	0
hsa-mir-3922	miRNA	123.7	26	92.2	6	2	0	8
hsa-mir-3923	miRNA	622	0	622	0	0	1	1
hsa-mir-3924	miRNA	16	0	15	0	0	0	0
hsa-mir-3925	miRNA	292	269	23	1	4	93	98
hsa-mir-3926-1	miRNA	101.643	85.5	12	24.5	0.5	0	25
hsa-mir-3926-2	miRNA	238.643	144.5	31	15	0	0	15
hsa-mir-3927	miRNA	220	0	220	0	0	0	0
hsa-mir-3928	miRNA	23091.5	29	22915.5	1942	2448	145	4535
hsa-mir-3929	miRNA	158.605	1.19	135.5	1	0	10.51	11.51
hsa-mir-3934	miRNA	9326.38	9252.38	72.5	1558.67	1018.83	253.75	2831.25
hsa-mir-3935	miRNA	1938.5	3	1935	439	701	0	1140
hsa-mir-3936	miRNA	1130	4	1123	75	92	3	170
hsa-mir-3937	miRNA	7	0	7	0	0	2	2
hsa-mir-3938	miRNA	306	47	258	0	2	2	4
hsa-mir-3939	miRNA	304	70	233	0	0	2	2
uc003byw.2_intron_7_0_chr3_14709026_f.3p	5p tailed mirtron candidate	25	17	7	0	0	0	0
hsa-mir-3941	miRNA	144	72	68	12	7	0	19
hsa-mir-3942	miRNA	837	699	138	4	14	18	36
hsa-mir-3943	miRNA	156	140	10	0	0	0	0
hsa-mir-3944	miRNA	361	162	199	5	0	7.5	12.5
hsa-mir-3945	miRNA	81	31	49	0	0	0	0
hsa-mir-3960	miRNA	6.96335	3.27	1.06	0	0	0.272856	0.272856
hsa-mir-3975	miRNA	2	2	0	0	0	0	0
hsa-mir-3976	miRNA	3	0	1	0	0	0	0
hsa-mir-3978	miRNA	1	0	1	0	0	0	0
hsa-mir-409	miRNA	55612	23078	32516	0	0	8	8
hsa-mir-410	miRNA	17594.2	41.25	17552	0	0	0	0
hsa-mir-411	miRNA	99146	96006	3136	0	15	6	21
hsa-mir-412	miRNA	1644	1589	48	0	0	0	0
hsa-mir-421	miRNA	78630.4	154.1	78440	251	78	7128.34	7457.34
hsa-mir-422a	miRNA	50	50	0	2	8	2	12
hsa-mir-423	miRNA	3096223	2585171	509276	29899.3	25639	2671	58209.3
hsa-mir-424	miRNA	1359181	1.23821e+06	82	798	550	30607.5	31955.5
hsa-mir-425	miRNA	479894	431792	42044	8724	9221	2676	20621
hsa-mir-4254	miRNA	46	10	36	0	0	0	0
hsa-mir-4258	miRNA	1	1	0	0	0	0	0
hsa-mir-4259	miRNA	1	1	0	0	0	0	0
hsa-mir-4262	miRNA	3	0	0	0	0	0	0
hsa-mir-4263	miRNA	3	3	0	0	0	0	0
hsa-mir-4284	miRNA	118.6	118.6	0	0	0	0	0
hsa-mir-4285	miRNA	1	0	1	0	0	0	0
hsa-mir-4286	miRNA	2066.62	2066.62	0	0.05	0.4	0.02	0.47
hsa-mir-4289	miRNA	14	14	0	0	0	0	0
hsa-mir-429	miRNA	86193	375	85667	0	0	809.5	809.5
hsa-mir-4292	miRNA	2	1	0	0	0	0	0
hsa-mir-4295	miRNA	1	0	1	0	0	0	0
hsa-mir-4298	miRNA	0.125	0.12	0	0	0	0	0
hsa-mir-4306	miRNA	448.917	1	446.92	0.25	0	5	5.25
hsa-mir-4308	miRNA	1	1	0	0	0	0	0
hsa-mir-4309	miRNA	2	0	0	0	0	0	0
hsa-mir-431	miRNA	3914	844	3041	0	0	0	0
hsa-mir-4312	miRNA	0.5	0.5	0	0	0	0	0
hsa-mir-4315-1	miRNA	3.5	0	3.5	0	0	0.5	0.5
hsa-mir-4315-2	miRNA	3.5	0	3.5	0	0	0.5	0.5
hsa-mir-4317	miRNA	7	7	0	0	0	0	0
hsa-mir-432	miRNA	107428	107352	72	0	0	0	0
hsa-mir-4323	miRNA	0.5	0	0.5	0	0	0	0
hsa-mir-4324	miRNA	162	1	0	0	0	0	0
hsa-mir-4325	miRNA	2	0	0	0	0	0	0
hsa-mir-4326	miRNA	2280.45	2280.17	0	145.333	75	0	220.333
hsa-mir-4328	miRNA	6.5	0	6.5	0	0	0	0
hsa-mir-433	miRNA	69326	1268	68055	0	0	0	0
hsa-mir-4417	miRNA	57.75	57.75	0	0	0	0	0
hsa-mir-4418	miRNA	9	0	9	0	0	0	0
hsa-mir-4419a	miRNA	9.43766	7.05	0	0	0	0.24	0.24
hsa-mir-4419b	miRNA	62.7222	0	62.67	0	0	0	0
hsa-mir-4420	miRNA	4390	1	4386	0	0	0	0
hsa-mir-4421	miRNA	903.564	16.5	887.06	3.16667	0	0	3.16667
hsa-mir-4422	miRNA	284	265	19	0	0	0	0
hsa-mir-4423	miRNA	1196.93	491.93	703	0	0	0	0
hsa-mir-4424	miRNA	167.5	114.5	53	0	0	0	0
hsa-mir-4425	miRNA	4147.5	1	4146.5	0	0	0	0
hsa-mir-4426	miRNA	112.7	85.02	3.5	0	0	0.2	0.2
hsa-mir-4427	miRNA	599	0	599	146	132	1	279
hsa-mir-4428	miRNA	117.058	0	117	0	0	4	4
hsa-mir-4429	miRNA	10468	10468	0	6.33333	7.5	25.3333	39.1667
hsa-mir-4430	miRNA	170.953	170.83	0.06	0	0	0	0
hsa-mir-4431	miRNA	467	449	3	0	0	0	0
hsa-mir-4432	miRNA	115	0	115	0	0	0	0
hsa-mir-4433	miRNA	123	10	113	0	0	0	0
hsa-mir-4434	miRNA	187.333	183.33	0	0	0	0	0
hsa-mir-4435-1	miRNA	1273.83	1256.83	15.5	194	131.5	28.5	354
hsa-mir-4435-2	miRNA	1273.83	1256.83	15.5	194	131.5	28.5	354
hsa-mir-4436a	miRNA	156	0	153	0	0	0	0
hsa-mir-4436b	miRNA	76.1667	6	69.17	0	0	0	0
hsa-mir-4437	miRNA	457	0	456	0	0	0	0
hsa-mir-4438	miRNA	51.5	2	49.5	0	0	0	0
hsa-mir-4439	miRNA	31	31	0	0	0	0	0
hsa-mir-4440	miRNA	85.6001	0	81.5	0	0	0	0
hsa-mir-4441	miRNA	2.86667	1.2	1.67	0	0	0	0
hsa-mir-4442	miRNA	412.5	4	370	0	0	1	1
hsa-mir-4443	miRNA	1195	1195	0	0	5	0	5
hsa-mir-4444	miRNA	733.5	1	454.67	2.66667	13.3333	9.66667	25.6667
hsa-mir-4445	miRNA	104.143	52	52.14	0	0	0	0
hsa-mir-4446	miRNA	6985.78	54	6929.78	0	0	2550.27	2550.27
hsa-mir-4447	miRNA	21.5	0	21.5	0	0	0	0
hsa-mir-4448	miRNA	415.583	0.25	415.33	0	0	3.33333	3.33333
hsa-mir-4449	miRNA	888.44	6.33	809.25	1	0	27	28
hsa-mir-4450	miRNA	1076.4	1076.4	0	238	37	0	275
hsa-mir-4451	miRNA	98.5	0	98.5	0	0	0	0
hsa-mir-4452	miRNA	51.3629	44.34	7	0	0	0	0
hsa-mir-4453	miRNA	166.5	136.5	2	0	0	0	0
hsa-mir-4454	miRNA	1400.41	1399.14	0.06	0.97	0.44	0.03	1.44
hsa-mir-4455	miRNA	1.58333	1.5	0	0	0	0	0
hsa-mir-4457	miRNA	154	7	147	1	2	7	10
hsa-mir-4458	miRNA	433	433	0	0	0	0	0
hsa-mir-4459	miRNA	36.3367	26.38	0.88	0	0	0	0
hsa-mir-4460	miRNA	51	51	0	0	0	0	0
hsa-mir-4461	miRNA	1075	111	579.5	10.3333	7.33333	10.5	28.1667
hsa-mir-4462	miRNA	32	0	32	0	0	0	0
hsa-mir-4463	miRNA	8.75	0	8.75	0	0	0	0
hsa-mir-4464	miRNA	996	668	7	0	0	0	0
hsa-mir-4465	miRNA	51	0	50	0	0	0	0
hsa-mir-4466	miRNA	1070.5	1069.5	0	154.5	36.5	29	220
hsa-mir-4467	miRNA	515	468	13	0	0	0	0
hsa-mir-4468	miRNA	6.5	0	5.5	0	0	0	0
hsa-mir-4469	miRNA	292	3	286	3	0	0	3
hsa-mir-4470	miRNA	445	14	411	0	0	0	0
hsa-mir-4471	miRNA	164.5	1	163	0	0	0	0
hsa-mir-4472-1	miRNA	1	0	0	0	0	0	0
hsa-mir-4472-2	miRNA	2.77444	2.49	0.22	0	0	0	0
hsa-mir-4473	miRNA	1983	1204	761	96	217	2	315
hsa-mir-4474	miRNA	291.5	14	277.5	0	4	2	6
hsa-mir-4475	miRNA	267	3	264	0	0	0	0
hsa-mir-4476	miRNA	1113	0	1109	0	1	0	1
hsa-mir-4477a	miRNA	111.911	23	88.91	2	0	0	2
hsa-mir-4477b	miRNA	291.014	2.6	264.87	0	0	10.5	10.5
hsa-mir-4478	miRNA	2	2	0	0	0	0	0
hsa-mir-4479	miRNA	171	29	130	3	3	3	9
hsa-mir-448	miRNA	5046	25	5011	0	0	7	7
hsa-mir-4480	miRNA	78	0	78	0	0	0	0
hsa-mir-4482	miRNA	258.6	125	132.6	23	35	0	58
hsa-mir-4483	miRNA	4	0	4	0	0	0	0
hsa-mir-4484	miRNA	645.648	0	645.65	0	0	0	0
hsa-mir-4485	miRNA	2310.3	167.93	2103	4.5	1.75	7	13.25
hsa-mir-4486	miRNA	15	15	0	0	0	0	0
hsa-mir-4487	miRNA	872	419.17	4.83	0	0	0	0
hsa-mir-4488	miRNA	4252.33	4252.33	0	2	5	207.167	214.167
hsa-mir-4489	miRNA	279	277	0	0	6	0	6
hsa-mir-4490	miRNA	109	0	109	0	0	0	0
hsa-mir-4491	miRNA	104.5	6.5	98	0	0	0	0
hsa-mir-4492	miRNA	384	7	375	0	4	21	25
hsa-mir-4493	miRNA	278	0	278	0	0	0	0
hsa-mir-4494	miRNA	41	0	41	0	0	0	0
hsa-mir-4495	miRNA	36	31	5	0	0	0	0
hsa-mir-4496	miRNA	118.61	0	115.61	0	0	0	0
hsa-mir-4497	miRNA	7	7	0	0	0	0	0
hsa-mir-4498	miRNA	344	331	12	17	18	14	49
hsa-mir-4499	miRNA	7.75	6.75	0	0	0	0	0
hsa-mir-449a	miRNA	14989.2	14852	117	0	0	0	0
hsa-mir-449b	miRNA	13296.8	13167.5	117.33	0	0	2	2
hsa-mir-449c	miRNA	55435.5	55370.5	51	0	0	2	2
hsa-mir-4500	miRNA	4.5	0	4.5	0	0	0	0
hsa-mir-4501	miRNA	191	121	70	0	0	4	4
hsa-mir-4502	miRNA	320	0	319	0	0	0	0
hsa-mir-4503	miRNA	126	126	0	0	0	0	0
hsa-mir-4504	miRNA	671.177	5	666.17	123	64	99	286
hsa-mir-4505	miRNA	253.333	248.33	1	0	0	0	0
hsa-mir-4506	miRNA	132	0	132	0	0	0	0
hsa-mir-4507	miRNA	82.7778	1	81.78	0	0	0	0
hsa-mir-4508	miRNA	1199.5	1199.5	0	0	0	7.83333	7.83333
hsa-mir-4509-1	miRNA	24.25	24	0.25	0	0	0.25	0.25
hsa-mir-4509-2	miRNA	24.25	24	0.25	0	0	0.25	0.25
hsa-mir-4509-3	miRNA	24.25	24	0.25	0	0	0.25	0.25
hsa-mir-450a-1	miRNA	20861.3	19074	1731	10.5	6	89.5	106
hsa-mir-450a-2	miRNA	25820	19141	6571.67	11.5	6	88.5	106
hsa-mir-450b	miRNA	15571.7	15192.6	377	270	105	850	1225
hsa-mir-451	miRNA	2645996	2.64255e+06	64	0	0	6	6
hsa-mir-4510	miRNA	10721	10721	0	12	10	63	85
hsa-mir-4511	miRNA	658	643	2	49	74	2	125
hsa-mir-4512	miRNA	340.07	1.23	338.33	9	19.0175	3.25	31.2675
hsa-mir-4513	miRNA	487	463	0	0	0	0	0
hsa-mir-4514	miRNA	12.5	12.5	0	0	0	0	0
hsa-mir-4515	miRNA	487.5	467.5	1	0	0	7	7
hsa-mir-4516	miRNA	252.2	251	0	0	0	48	48
hsa-mir-4517	miRNA	4455	4449	1	0	0	0	0
hsa-mir-4518	miRNA	230.023	0.02	230	0	0	0	0
hsa-mir-4519	miRNA	164	101	3	0	0	0	0
hsa-mir-451b	miRNA	11	9	0	0	0	0	0
hsa-mir-452	miRNA	427573	416408	10998.3	9598.17	8404.5	0	18002.7
hsa-mir-4520a	miRNA	624.167	1.5	619.67	0.5	0	3.83333	4.33333
hsa-mir-4520b	miRNA	340.167	0.5	339.67	0.5	0	3.83333	4.33333
hsa-mir-4521	miRNA	261475	256192	309	3	0	0	3
hsa-mir-4522	miRNA	208	0	135	0	0	0	0
hsa-mir-4523	miRNA	373	357	1	9	0	3	12
hsa-mir-4524	miRNA	2971.5	1064	1901.5	0	0	0	0
hsa-mir-4525	miRNA	1030	712	309	0	0	12	12
hsa-mir-4526	miRNA	363.286	9	353.29	0	0	2	2
hsa-mir-4527	miRNA	90	88	1	0	0	0	0
hsa-mir-4528	miRNA	98	2	96	0	0	0	0
hsa-mir-4529	miRNA	391.167	4.5	385.67	0	0	0	0
hsa-mir-4530	miRNA	56	1	48	0	0	0	0
hsa-mir-4531	miRNA	5	0	5	0	0	0	0
hsa-mir-4532	miRNA	21892	21892	0	17	3	136	156
hsa-mir-4533	miRNA	175	175	0	0	0	0	0
hsa-mir-4534	miRNA	1	0	0	0	0	0	0
hsa-mir-4535	miRNA	2	0	2	0	0	0	0
hsa-mir-4536	miRNA	295	0	294	0	0	0	0
hsa-mir-4537	miRNA	20.8374	15	3.04	0	0	0	0
hsa-mir-4538	miRNA	6.5	1	0.5	0	0	0	0
hsa-mir-4539	miRNA	11.2854	4.08	0	0	0	0	0
hsa-mir-454	miRNA	86972	1839	84995	324	240	725	1289
hsa-mir-4540	miRNA	3	0	3	0	0	0	0
hsa-mir-455	miRNA	252658	41851	210707	423	237	176	836
uc010iqh.1_intron_12_0_chr4_158281296_f.5p	5p tailed mirtron candidate	25.5	17.5	8	0	0	0	0
hsa-mir-4633	miRNA	38	4	34	0	0	0	0
hsa-mir-4634	miRNA	36	36	0	0	0	0	0
hsa-mir-4635	miRNA	153	2	145	0	0	2	2
hsa-mir-4636	miRNA	170	155	15	0	0	0	0
hsa-mir-4637	miRNA	205	3	193	20	2	0	22
hsa-mir-4638	miRNA	468	79	385	8	13	16	37
uc002pkp.2_intron_4_0_chr19_49300280_r	5p tailed mirtron candidate	26	1	24	0	0	1	1
uc003foz.2_intron_8_0_chr3_184296255_f.3p	5p tailed mirtron candidate	26	11	15	0	0	0	0
uc010yzf.1_intron_1_0_chr2_127808099_r	5p tailed mirtron candidate	26.5	4	18	0	1	0	1
hsa-mir-4642	miRNA	80	78	2	3	0	3	6
hsa-mir-4643	miRNA	59	8	51	0	0	0	0
hsa-mir-4644	miRNA	64.95	9	55.95	7	0	0	7
hsa-mir-4645	miRNA	243.333	19	184	0	1	1	2
uc003dbw.1_intron_10_0_chr3_51971603_r	mirtron candidate	27.5833	13	14	0	0	5	5
hsa-mir-4647	miRNA	1521.83	1507.83	2	5	0	4.5	9.5
hsa-mir-4648	miRNA	80.5	71.5	0	4	0	7	11
uc003zbt.3_intron_4_0_chr8_145534936_f	5p tailed mirtron candidate	27.5833	8	17	0	0	2	2
hsa-mir-4650-1	miRNA	34	1.5	32.5	0	0	0	0
hsa-mir-4650-2	miRNA	34	1.5	32.5	0	0	0	0
hsa-mir-4651	miRNA	381.5	379.5	0	0	0	0	0
hsa-mir-4652	miRNA	291	264	27	0	0	80	80
hsa-mir-4653	miRNA	39.5	12	27.5	0	0	1	1
hsa-mir-4654	miRNA	414	412	1	34	27	30	91
hsa-mir-4655	miRNA	104	88	14	0	11	3	14
hsa-mir-4656	miRNA	48.25	48.25	0	0	0	0	0
hsa-mir-4657	miRNA	412.5	407	0	0	0	15	15
hsa-mir-4658	miRNA	158	2	156	0	0	19	19
hsa-mir-4659a	miRNA	366.7	23.33	343.37	3	1	3	7
hsa-mir-4659b	miRNA	75.7	3.33	72.37	0	0	0	0
hsa-mir-466	miRNA	286.51	164.5	121	0	0	0	0
hsa-mir-4660	miRNA	385	384	0	12	2	3	17
hsa-mir-4661	miRNA	587.5	520.5	65	87	93	4	184
hsa-mir-4662a	miRNA	629	339	288	0	0	19	19
hsa-mir-4662b	miRNA	117	2	115	0	0	1	1
hsa-mir-4663	miRNA	34	34	0	0	0	0	0
hsa-mir-4664	miRNA	870	700	165	26	19	5	50
hsa-mir-4665	miRNA	179	176	2	2	9	0	11
hsa-mir-4666	miRNA	54	17	31.5	0	3.5	1.5	5
uc001ajm.1_intron_6_0_chr1_2444479_r.3p	5p tailed mirtron candidate	28	14	14	0	0	0	0
hsa-mir-4668	miRNA	252.024	161.53	82.36	0	0	0	0
hsa-mir-4669	miRNA	74.5	0	73	0	1	29	30
hsa-mir-4670	miRNA	133	103.5	28.5	0	0	1.5	1.5
hsa-mir-4671	miRNA	56	20	36	0	0	0	0
hsa-mir-4672	miRNA	94.3333	4.33	90	1	0	2	3
uc001ymw.3_intron_14_0_chr14_103958372_f.3p	5p tailed mirtron candidate	28	19	7	0	0	0	0
hsa-mir-4674	miRNA	68	0	67	0	1	2	3
hsa-mir-4675	miRNA	13	1	12	0	0	1	1
hsa-mir-4676	miRNA	139.5	91	48.5	5	0	0	5
hsa-mir-4677	miRNA	3372.33	280	3090.33	32	27	16	75
hsa-mir-4678	miRNA	14	12	2	0	0	0	0
hsa-mir-4679-1	miRNA	31	26.5	4.5	0	0.5	0	0.5
hsa-mir-4679-2	miRNA	31	26.5	4.5	0	0.5	0	0.5
hsa-mir-4680	miRNA	252.667	91	144.17	20	18	1	39
hsa-mir-4681	miRNA	14	14	0	0	0	0	0
hsa-mir-4682	miRNA	33	31	2	0	0	0	0
hsa-mir-4683	miRNA	64	1	58	0	0	0	0
hsa-mir-4684	miRNA	114	4	110	0	0	0	0
uc002jth.2_intron_6_0_chr17_74901416_f.3p	5p tailed mirtron candidate	28	4	24	3	0	0	3
hsa-mir-4686	miRNA	55.5	54	1.5	0	0	2	2
hsa-mir-4687	miRNA	400	42	355	1	0	6	7
uc002xro.2_intron_3_0_chr20_44983605_r	5p tailed mirtron candidate	28	3	24	0	0	0	0
hsa-mir-4689	miRNA	229	222	7	3	0	0	3
uc003bmk.3_intron_7_0_chr22_51010552_r	5p tailed mirtron candidate	30	15	14	0	0	0	0
hsa-mir-4691	miRNA	238	3	234	0	17	2	19
hsa-mir-4692	miRNA	14	2	12	0	0	0	0
hsa-mir-4693	miRNA	30	6	24	0	0	0	0
hsa-mir-4694	miRNA	15	2	13	0	1	0	1
hsa-mir-4695	miRNA	107	95	12	0	0	0	0
hsa-mir-4696	miRNA	25	23	1	0	0	0	0
hsa-mir-4697	miRNA	39	16	21	0	0	0	0
hsa-mir-4698	miRNA	48	0	39	0	0	2	2
hsa-mir-4699	miRNA	195.5	167.5	28	0	0	1	1
hsa-mir-4700	miRNA	164	145	11	0	5	1	6
uc003mgx.2_intron_8_0_chr5_176894334_r	5p tailed mirtron candidate	30	5	25	0	0	1	1
hsa-mir-4703	miRNA	34	2	32	0	0	0	0
hsa-mir-4704	miRNA	9	2	7	0	0	0	0
hsa-mir-4705	miRNA	132.167	131.5	0.67	0	0	0	0
hsa-mir-4706	miRNA	128	118	9	0	0	0	0
hsa-mir-4707	miRNA	643.5	258.5	357.5	33	37	4	74
hsa-mir-4708	miRNA	121	6.67	112.33	0	0	2	2
hsa-mir-4709	miRNA	234.5	113.5	77	0	0	0	0
hsa-mir-4710	miRNA	61.8333	48.5	2	0	0	0	0
hsa-mir-4711	miRNA	26	22	2	0	0	0	0
hsa-mir-4712	miRNA	48	5.5	40.5	0	0	0	0
hsa-mir-4713	miRNA	227	194	33	0	0	5	5
hsa-mir-4714	miRNA	163	48	115	1	29	2	32
hsa-mir-4715	miRNA	52.5	41.5	6	0	0	1	1
hsa-mir-4716	miRNA	122.567	5.5	96.57	1	2.5	0	3.5
hsa-mir-4717	miRNA	127.033	12	108.53	1	12.6667	0.5	14.1667
hsa-mir-4718	miRNA	7	6	0	0	0	0	0
hsa-mir-4719	miRNA	9	0	9	0	0	0	0
hsa-mir-4720	miRNA	27	23	1	0	0	1	1
hsa-mir-4721	miRNA	192.5	2	188	0	0	150	150
uc010ruh.1_intron_8_0_chr11_95555741_f.3p	5p tailed mirtron candidate	30	25	3	0	20	0	20
hsa-mir-4723	miRNA	194	154	32	0	4	0	4
hsa-mir-4724	miRNA	715	677	13	13	0	6	19
hsa-mir-4725	miRNA	278.833	29	244.5	4	12	4	20
uc010eei.2_intron_27_0_chr19_36223037_f	5p tailed mirtron candidate	30.1345	10.13	18	4	5	1.03448	10.0345
hsa-mir-4727	miRNA	369	7	362	0	0	0	0
uc003nsq.3_intron_15_0_chr6_31124614_r	3p tailed mirtron candidate	30.5	4	26	8	0	1	9
hsa-mir-4729	miRNA	27	18	8	0	0	1	1
hsa-mir-4730	miRNA	54	49	4	0	0	2	2
hsa-mir-4731	miRNA	103	92	11	0	0	2	2
hsa-mir-4732	miRNA	832.583	815.25	7.33	0	0	0	0
hsa-mir-4733	miRNA	98	66.5	9	3	0	1	4
hsa-mir-4734	miRNA	288.5	2	282.5	0	1	0	1
hsa-mir-4735	miRNA	128	58	70	0	0	0	0
hsa-mir-4736	miRNA	520	519	0	0	0	0	0
hsa-mir-4737	miRNA	25.4212	13.18	6.82	0	0	1.84848	1.84848
hsa-mir-4738	miRNA	399.9	4	362	18	23	1	42
hsa-mir-4739	miRNA	129.75	124.75	4	1	0	0	1
hsa-mir-4740	miRNA	104	98	3	12	8	0	20
hsa-mir-4741	miRNA	2472	4	2428	69	46	0	115
uc002daa.1_intron_3_0_chr16_10846536_f.3p	5p tailed mirtron candidate	31	17	14	0	0	0	0
uc002hbn.2_intron_8_0_chr17_26890926_r.3p	5p tailed mirtron candidate	31	20	9	4	0	0	4
hsa-mir-4744	miRNA	52	46	6	0	1	0	1
uc002hqj.2_intron_0_0_chr17_36872082_f.3p	5p tailed mirtron candidate	31	23	3	0	0	0	0
hsa-mir-4746	miRNA	2195.33	2138	54	204	207	17	428
uc003mwv.2_intron_1_0_chr6_6152183_r.3p	5p tailed mirtron candidate	31	26	4	0	0	0	0
hsa-mir-4748	miRNA	125.5	125.5	0	8	1	0	9
uc011aru.1_intron_12_0_chr22_50754517_r	5p tailed mirtron candidate	31	22	5	0	0	0	0
uc001txo.2_intron_3_0_chr12_120569138_r.3p	5p tailed mirtron candidate	32	27	4	5	11	2	18
hsa-mir-4751	miRNA	285.333	205	0	4	0	12	16
hsa-mir-4752	miRNA	8	8	0	0	0	0	0
hsa-mir-4753	miRNA	514	475	36	19	6	2	27
hsa-mir-4754	miRNA	113	104	3	1	0	1	2
hsa-mir-4755	miRNA	208	67	141	0	1	0	1
hsa-mir-4756	miRNA	23	15	8	0	0	7	7
hsa-mir-4757	miRNA	119	47	71	5	0	0	5
uc002mxv.2_intron_2_0_chr19_14074088_r	5p tailed mirtron candidate	32	12	20	1	6	0	7
hsa-mir-4759	miRNA	12	9.5	1.5	0	0	0	0
hsa-mir-4760	miRNA	401	399	2	0	0	309	309
hsa-mir-4761	miRNA	427	130	293	0	0	0	0
hsa-mir-4762	miRNA	362.833	183.67	153.17	0	10	3	13
hsa-mir-4763	miRNA	181.5	30	139.92	5	0	2	7
hsa-mir-4764	miRNA	122	117	5	0	0	3	3
hsa-mir-4765	miRNA	97	3	94	2	0	0	2
hsa-mir-4766	miRNA	729	256	472	22	37	1	60
hsa-mir-4767	miRNA	161.5	159.5	1	0.5	0	0	0.5
hsa-mir-4768	miRNA	147.333	128.83	18.5	14.5	1	2	17.5
hsa-mir-4769	miRNA	68.5	65	3	0	11	0	11
hsa-mir-4770	miRNA	78	0	77	0	0	0	0
hsa-mir-4771-1	miRNA	23	21	2	5	0	0	5
hsa-mir-4771-2	miRNA	23	21	2	5	0	0	5
hsa-mir-4772	miRNA	397.5	227.5	170	0	1	0	1
hsa-mir-4773-1	miRNA	21	6	15	0	0	0	0
hsa-mir-4773-2	miRNA	21	6	15	0	0	0	0
hsa-mir-4774	miRNA	255	242	13	0	0	3	3
hsa-mir-4775	miRNA	282.67	270.07	7.6	24	15	0	39
hsa-mir-4776-1	miRNA	40.3333	35.33	3.5	0	0	0	0
hsa-mir-4776-2	miRNA	44.3333	38.33	3.5	0	0	0	0
hsa-mir-4777	miRNA	72.5	14	52	0	0	0	0
hsa-mir-4778	miRNA	817	360	452	0	0	2	2
hsa-mir-4779	miRNA	223	11	211	24	46	0	70
hsa-mir-4780	miRNA	24	1	22	0	0	0	0
hsa-mir-4781	miRNA	357	32	315	43	55	2	100
hsa-mir-4782	miRNA	112.5	110	1.5	0	1	0	1
hsa-mir-4783	miRNA	277	10	267	5	10	8	23
hsa-mir-4784	miRNA	107.5	99	5	7	14	13	34
hsa-mir-4785	miRNA	350.5	3	346	0	0.5	0	0.5
hsa-mir-4786	miRNA	451	313	138	38	30	1	69
hsa-mir-4787	miRNA	1224	30	1194	23	4	4	31
hsa-mir-4788	miRNA	42.5	42.5	0	0.5	1	0	1.5
hsa-mir-4789	miRNA	215	45	170	0	0	7	7
hsa-mir-4790	miRNA	48	20	23.5	0	0	0	0
hsa-mir-4791	miRNA	933	933	0	0	0	0	0
hsa-mir-4792	miRNA	37	37	0	0	0	0	0
hsa-mir-4793	miRNA	195	30	164	35	11	5	51
hsa-mir-4794	miRNA	44	20	24	0	0	1	1
hsa-mir-4795	miRNA	73.8333	20.5	36	0	0	1	1
hsa-mir-4796	miRNA	470.5	16	454.5	0	0	0	0
hsa-mir-4797	miRNA	200.75	37	163.75	9.5	3.5	2	15
hsa-mir-4798	miRNA	510	504	6	106	79	3	188
hsa-mir-4799	miRNA	65.5	56.5	9	1	0	1	2
hsa-mir-4800	miRNA	165.53	139	13	2	1	0	3
hsa-mir-4801	miRNA	8	0	8	0	0	0	0
hsa-mir-4802	miRNA	817	175	642	75	75	28	178
hsa-mir-4803	miRNA	34	33	1	0	0	1	1
hsa-mir-4804	miRNA	167	131	34	5	9	0	14
hsa-mir-483	miRNA	474419	426920	47301.3	6	0	0	6
hsa-mir-484	miRNA	85302.9	85266.9	3	143	139	456.5	738.5
hsa-mir-485	miRNA	147697	101247	46443	0	0	0	0
hsa-mir-486	miRNA	182736	171566	11168	868	328.667	25.5	1222.17
hsa-mir-487a	miRNA	4933	770	4163	0	0	0	0
hsa-mir-487b	miRNA	36138	153	35984	0	0	0	0
hsa-mir-488	miRNA	16415	13870	2545	0	0	0	0
hsa-mir-489	miRNA	15600	86	15513	0	0	12474	12474
hsa-mir-490	miRNA	7979	678	7299	0	0	0	0
hsa-mir-491	miRNA	6897	6397	499	8	3	4	15
hsa-mir-492	miRNA	45.5	35.5	0	0	0	2.5	2.5
hsa-mir-493	miRNA	21032.9	17082.5	3945.33	0	0	2	2
hsa-mir-494	miRNA	13536	152	13347	0	0	0	0
hsa-mir-495	miRNA	56245	227	56014	0	0	0	0
hsa-mir-496	miRNA	1814	199	1585	0	0	0	0
hsa-mir-497	miRNA	223287	220884	1919.5	43.5	46	162.5	252
hsa-mir-498	miRNA	70	65	5	0	0	0	0
hsa-mir-499	miRNA	180675	176375	3997	1	0	4	5
hsa-mir-499a	miRNA	159	122	35	0	0	0	0
hsa-mir-500a	miRNA	50617.1	5522.25	45025.3	361.75	187	80.75	629.5
hsa-mir-500b	miRNA	6716	5532.25	1133.75	180.25	51.5	7.75	239.5
hsa-mir-501	miRNA	22129.5	6509	15583	610	223	240.5	1073.5
hsa-mir-502	miRNA	46992.8	2719.5	44271.3	125.5	84.5	41	251
hsa-mir-503	miRNA	347869	345509	1901.5	2234	1834	1289	5357
hsa-mir-504	miRNA	12671.8	12316.5	345.25	0	0	33	33
hsa-mir-5047	miRNA	47.3333	5	11	0	0	2	2
hsa-mir-505	miRNA	55185.8	24012.5	31154.5	2283.5	491.5	109	2884
hsa-mir-506	miRNA	2370	848	1512	8	0	1	9
hsa-mir-507	miRNA	297	4	293	0	0	0	0
hsa-mir-508	miRNA	28577	4675	23894	0	3	27	30
hsa-mir-509-1	miRNA	16171	6794	9370.33	0	0	9.66667	9.66667
hsa-mir-509-2	miRNA	16171	6794	9370.33	0	0	9.66667	9.66667
hsa-mir-509-3	miRNA	53678.7	44306	9370.33	0	0	12.6667	12.6667
hsa-mir-5095	miRNA	13.97	6.2	4.63	0	0	0.32	0.32
hsa-mir-5096	miRNA	19.8	10.48	1.76	0.01	0.01	0.18	0.2
hsa-mir-510	miRNA	724	673	51	0	0	0	0
hsa-mir-511-1	miRNA	4585.39	454.98	4129.92	24.5	0	0	24.5
hsa-mir-511-2	miRNA	4585.39	454.98	4129.92	24.5	0	0	24.5
hsa-mir-512-1	miRNA	254.5	40	214.5	0	0	0.5	0.5
hsa-mir-512-2	miRNA	254.833	40	214.5	0	0	0.5	0.5
hsa-mir-513a-1	miRNA	1595.58	1346.33	233.75	0	0	0	0
hsa-mir-513a-2	miRNA	1583.08	1346.33	233.75	0	0	0	0
hsa-mir-513b	miRNA	1161	1129	32	0	0	1	1
hsa-mir-513c	miRNA	3159.25	2659	500.25	0	0	0	0
hsa-mir-514-1	miRNA	3216	733.67	2478.67	0	0	2.66667	2.66667
hsa-mir-514-2	miRNA	3215.17	734.17	2478.67	0	0	2.66667	2.66667
hsa-mir-514-3	miRNA	3215.17	734.17	2478.67	0	0	2.66667	2.66667
hsa-mir-514b	miRNA	840	745	95	0	0	0	0
hsa-mir-515-1	miRNA	146	104	42	0	0	1	1
hsa-mir-515-2	miRNA	146	104	42	0	0	1	1
hsa-mir-516a-1	miRNA	2255.93	2221.5	17.5	5	0.5	0	5.5
hsa-mir-516a-2	miRNA	2255.93	2221.5	17.5	5	0.5	0	5.5
hsa-mir-516b-1	miRNA	390.5	373	17.5	0	0	0.5	0.5
hsa-mir-516b-2	miRNA	346.5	329	17.5	0	0	0.5	0.5
hsa-mir-517a	miRNA	191.833	2.33	189.5	0	0	0.5	0.5
hsa-mir-517b	miRNA	191.833	2.33	189.5	0	0	0.5	0.5
hsa-mir-517c	miRNA	75.3333	2.33	69.25	0	0	3	3
hsa-mir-518a-1	miRNA	134	97	37	0	0	0	0
hsa-mir-518a-2	miRNA	138	101	37	0	0	0	0
hsa-mir-518b	miRNA	184.143	1.14	183	0	0	1	1
hsa-mir-518c	miRNA	145.5	11	131.5	0	0	0	0
hsa-mir-518d	miRNA	17.55	5.55	12	0	0	0	0
hsa-mir-518e	miRNA	124.41	27.41	97	0	0	0	0
hsa-mir-518f	miRNA	109.3	9.8	99.5	0	0	0	0
hsa-mir-519a-1	miRNA	2123.64	273.67	1848.58	0	0	2	2
hsa-mir-519a-2	miRNA	2044.33	194.5	1848.58	1	0	0.5	1.5
hsa-mir-519b	miRNA	241.843	27.41	214.33	0	0	0	0
hsa-mir-519c	miRNA	135.51	27.41	108	0	0	0	0
hsa-mir-519d	miRNA	101	2	99	0	0	0	0
hsa-mir-519e	miRNA	36.5	15.5	21	0	0	0	0
hsa-mir-520a	miRNA	145.571	72	73	0	0	1	1
hsa-mir-520b	miRNA	249.1	194.5	54.5	1	0	0.5	1.5
hsa-mir-520c	miRNA	60.15	5.55	54.5	0	0	0	0
hsa-mir-520d	miRNA	73.5	44.5	29	0	0	0	0
hsa-mir-520e	miRNA	27	2	24	0	0	0	0
hsa-mir-520f	miRNA	215	4	211	0	0	3	3
hsa-mir-520g	miRNA	91	4	87	0	0	0.5	0.5
hsa-mir-520h	miRNA	35	4	31	0	0	0.5	0.5
hsa-mir-521-1	miRNA	511	62	449	0	0	0	0
hsa-mir-521-2	miRNA	449	0	449	0	0	0	0
hsa-mir-522	miRNA	1109.51	27.41	1081	7	1	0	8
hsa-mir-523	miRNA	69.5095	27.41	42	0	0	0	0
hsa-mir-524	miRNA	146.5	126.5	20	0	0	0	0
hsa-mir-525	miRNA	95	62	33	0	0	0	0
hsa-mir-526a-1	miRNA	13.55	5.55	8	0	0	1	1
hsa-mir-526a-2	miRNA	5.55	5.55	0	0	0	0	0
hsa-mir-526b	miRNA	95	71	24	0	0	0	0
hsa-mir-527	miRNA	175	97	78	0	0	0	0
hsa-mir-532	miRNA	142027	120385	21605	5432	3673	1336	10441
hsa-mir-539	miRNA	101091	839	100243	0	0	0	0
hsa-mir-541	miRNA	551	494	56	0	0	0	0
hsa-mir-542	miRNA	93609.5	5718	87833	766	310	2679	3755
hsa-mir-543	miRNA	33935	138	33796	0	0	0	0
hsa-mir-544	miRNA	175.112	54.7	116.01	0	0	0	0
hsa-mir-544b	miRNA	222	1	219	0	0	1	1
hsa-mir-545	miRNA	5097.78	2220.25	2668.83	34.0714	12.5833	98.3968	145.052
hsa-mir-548a-1	miRNA	2449.08	3.22	2443.14	1	0	1.25	2.25
hsa-mir-548a-2	miRNA	2477.59	1.56	2474.47	1	0	1.25	2.25
hsa-mir-548a-3	miRNA	3108.76	511.5	2474.47	1	0	1.25	2.25
hsa-mir-548aa-1	miRNA	35.76	0	31.28	0.09	0.07	0.08	0.24
hsa-mir-548aa-2	miRNA	36.66	0.05	32.3	0.09	0.07	0.08	0.24
hsa-mir-548ab	miRNA	109.887	108.53	0	1.10897	3.25	0	4.35897
hsa-mir-548ac	miRNA	353.004	29.29	322.5	6.28448	0.637931	0.103448	7.02586
hsa-mir-548ad	miRNA	103.752	66.14	32	0.03	0.18	0.710513	0.920513
hsa-mir-548ae-1	miRNA	22.6321	0	22.62	0	0	0	0
hsa-mir-548ae-2	miRNA	61.923	38.45	22.62	0.03	0.294286	0.29	0.614286
hsa-mir-548ag-1	miRNA	59.7023	59.7	0	0	0	0	0
hsa-mir-548ag-2	miRNA	383.702	310.7	73	0	0	0	0
hsa-mir-548ah	miRNA	2748.66	2646	101.52	70.3463	80.8704	0.0755138	151.292
hsa-mir-548ai	miRNA	375.331	373.15	0.1	0	0.333333	0.5	0.833333
hsa-mir-548aj-1	miRNA	16.4475	0	15.42	0	0	0	0
hsa-mir-548aj-2	miRNA	23.6556	3.89	15.42	0	0.01	0	0.01
hsa-mir-548ak	miRNA	67.8169	67.07	0.22	0.0888889	0	0	0.0888889
hsa-mir-548al	miRNA	664.658	4.09	631.25	2	2	1	5
hsa-mir-548am	miRNA	125.252	45.3	77.39	0.841935	0.87331	0.109851	1.8251
hsa-mir-548an	miRNA	747.105	670.08	76.93	0	0	0	0
hsa-mir-548b	miRNA	11035	100.71	10920	0.0461153	0	0.0857143	0.13183
hsa-mir-548c	miRNA	61.7873	50.39	5.63	0.190909	0.372727	0.08	0.643636
hsa-mir-548d-1	miRNA	386.196	99.04	279.13	2.84	1.43	3.96	8.23
hsa-mir-548d-2	miRNA	383.463	98.67	279.13	2.84	1.43	3.96	8.23
hsa-mir-548e	miRNA	27411.2	1853	25558.2	291.5	213	10	514.5
hsa-mir-548f-1	miRNA	328.707	6.29	316.94	18.1012	44.9138	2.03448	65.0495
hsa-mir-548f-2	miRNA	51.4466	0	49.1	11.7414	8.71834	0.261755	20.7215
hsa-mir-548f-3	miRNA	51.1462	0.01	48.82	11.7414	8.71834	0.261755	20.7215
hsa-mir-548f-4	miRNA	68.028	10.42	54.94	0.101224	0.913793	0.0344828	1.0495
hsa-mir-548f-5	miRNA	4.28354	0.02	4.26	1	0.285714	0	1.28571
hsa-mir-548g	miRNA	7.10097	3.94	2.96	0.046875	0.295714	0	0.342589
hsa-mir-548h-1	miRNA	466.554	460.92	4.63	0	0	0.733333	0.733333
hsa-mir-548h-2	miRNA	473.536	460.92	6.69	0	0	0.793333	0.793333
hsa-mir-548h-3	miRNA	503.046	460.92	36.26	0.14	0.13	0.943333	1.21333
hsa-mir-548h-4	miRNA	481.058	460.92	14	0.07	0	0.733333	0.803333
hsa-mir-548h-5	miRNA	466.772	461.77	5	0	0	0.733333	0.733333
hsa-mir-548i-1	miRNA	37.5119	34.26	0	0	0	0	0
hsa-mir-548i-2	miRNA	34.3751	34.26	0	0	0	0	0
hsa-mir-548i-3	miRNA	34.369	34.26	0	0	0	0	0
hsa-mir-548i-4	miRNA	37.2919	34.26	0	0	0	0	0
hsa-mir-548j	miRNA	5382.63	5157.46	224.18	92.3929	69.5833	5	166.976
hsa-mir-548k	miRNA	13199.9	13053.5	128.81	36.037	6	6	48.037
hsa-mir-548l	miRNA	3169.9	3123	40.55	20	9	0	29
hsa-mir-548m	miRNA	5.01	3	2	0	0	0	0
hsa-mir-548n	miRNA	785.782	763.59	10.04	25.109	10.25	3	38.359
hsa-mir-548o	miRNA	1980.55	0.54	1980.02	43.8333	31.75	79.1784	154.762
hsa-mir-548o-2	miRNA	2032.67	50.4	1982.01	43.9333	31.85	79.2584	155.042
hsa-mir-548p	miRNA	130.415	18.2	111.27	1.67964	2.87044	0.0637491	4.61383
hsa-mir-548q	miRNA	156.747	142.04	0	7.2	0.333333	9.90385	17.4372
hsa-mir-548s	miRNA	818.987	5.49	805.67	0	0	0.0222222	0.0222222
hsa-mir-548t	miRNA	890.6	855	31.31	45.09	65.57	0.08	110.74
hsa-mir-548u	miRNA	1191.97	22.33	1169.59	12.2401	2.27632	2.55882	17.0753
hsa-mir-548v	miRNA	783.212	65.18	712.62	15.02	3	1.04762	19.0676
hsa-mir-548w	miRNA	104.709	101.95	1.31	0.592	0.153846	0.01	0.755847
hsa-mir-548x	miRNA	3790.51	11.69	3777.82	0	0.01	0	0.01
hsa-mir-548x-2	miRNA	96.8841	3.01	93.7	0	0.0192308	0	0.0192308
hsa-mir-548y	miRNA	224.657	206.07	10	0	0	0.666667	0.666667
hsa-mir-548z	miRNA	17.75	0.21	14.03	0.07	0	0	0.07
hsa-mir-549	miRNA	307.5	68	236.5	0.5	9.5	0	10
hsa-mir-550a-1	miRNA	4389.17	2632.17	1739.33	149.167	58.1667	11.3333	218.667
hsa-mir-550a-2	miRNA	4388.67	2632.17	1739.33	149.167	58.1667	11.3333	218.667
hsa-mir-550a-3	miRNA	2316.83	569.67	1739.33	48.6667	12.6667	5.33333	66.6667
hsa-mir-550b-1	miRNA	22	16.67	5.33	0.666667	0.333333	0	1
hsa-mir-550b-2	miRNA	22	16.67	5.33	0.666667	0.333333	0	1
hsa-mir-551a	miRNA	1113.5	6	1100.5	0	2	0	2
hsa-mir-551b	miRNA	25768	1940	23772	0	0	0	0
hsa-mir-552	miRNA	515.5	134	380	0	0	1	1
hsa-mir-553	miRNA	1	0	1	0	0	0	0
hsa-mir-554	miRNA	1	1	0	0	0	0	0
hsa-mir-555	miRNA	15.5	5	2	0	0	0	0
hsa-mir-556	miRNA	5081.5	2614	2467.5	52	73	323	448
hsa-mir-558	miRNA	6.29	0	0.5	0	0	0	0
hsa-mir-559	miRNA	126	34.5	89.5	0	0	2	2
hsa-mir-561	miRNA	2610	2349	258.5	0	0	21	21
hsa-mir-562	miRNA	0.0107527	0	0.01	0	0	0	0
hsa-mir-564	miRNA	40	6	9	0	0	0	0
hsa-mir-566	miRNA	3.7944	0.41	0.23	0	0	0.04	0.04
hsa-mir-567	miRNA	3.05087	1	2	0	0	0	0
hsa-mir-569	miRNA	3	0	3	0	0	0	0
hsa-mir-570	miRNA	3523.1	373.15	3120.03	2	10.3333	25.5	37.8333
hsa-mir-572	miRNA	3.5	0.5	1	0	0	0	0
hsa-mir-573	miRNA	1166.5	1163.5	0	0	0	0	0
hsa-mir-574	miRNA	90871.4	1034.03	89786.2	78.5827	131.952	126.61	337.145
hsa-mir-575	miRNA	3	0	3	0	0	0	0
hsa-mir-576	miRNA	9504.47	7223	2277.7	80.9785	196.488	123.65	401.117
hsa-mir-577	miRNA	31787.8	31506.5	276.33	6440.33	5514.5	0	11954.8
hsa-mir-578	miRNA	32	24	8	0	0	0	0
hsa-mir-579	miRNA	2160.62	1214	937	11	19	4	34
hsa-mir-580	miRNA	527.5	34	493.5	20	46.5	2	68.5
hsa-mir-581	miRNA	183	143	39	17	35	2	54
hsa-mir-582	miRNA	82302	12344	69909	12478	15703.5	27	28208.5
hsa-mir-584	miRNA	28878.4	28396.4	476	270	255	56	581
hsa-mir-585	miRNA	1223	278	944	0	0	0	0
hsa-mir-586	miRNA	66	52	14	12	0	0	12
hsa-mir-587	miRNA	9	9	0	0	0	0	0
hsa-mir-588	miRNA	145	91	54	0	0	0	0
hsa-mir-589	miRNA	17671.7	14355.7	3235	1946	1854	387	4187
hsa-mir-590	miRNA	124658	62762	61585.5	500	470.333	297	1267.33
hsa-mir-591	miRNA	2	1	0	0	0	0	0
hsa-mir-592	miRNA	2257	2150	104	0	0	1	1
hsa-mir-593	miRNA	22	3	19	0	0	0	0
hsa-mir-595	miRNA	2.5	0	1.5	0	0	0	0
hsa-mir-596	miRNA	1	1	0	0	0	0	0
hsa-mir-597	miRNA	966.5	367	589	5	20	1	26
hsa-mir-598	miRNA	87037.3	122	86868.2	0	0	1768.5	1768.5
hsa-mir-599	miRNA	9699.5	9076.5	621	3	0	1	4
hsa-mir-600	miRNA	327	267	55	0	0	4	4
hsa-mir-601	miRNA	2	1	0	0	0	1	1
hsa-mir-602	miRNA	68	66	2	14	0	6	20
hsa-mir-603	miRNA	12.1941	0.14	12.05	0	0	0	0
hsa-mir-605	miRNA	504	150	354	0	0	0	0
hsa-mir-606	miRNA	1	1	0	0	0	0	0
hsa-mir-607	miRNA	57.6083	34	20.33	0	1	35.3333	36.3333
hsa-mir-609	miRNA	19	11	8	0	0	2	2
hsa-mir-610	miRNA	16	15.5	0.5	0	0	0.5	0.5
hsa-mir-611	miRNA	62.5	17.5	23	0	0	0	0
hsa-mir-612	miRNA	117.5	30	59	0	0	1	1
hsa-mir-613	miRNA	1	1	0	0	0	0	0
hsa-mir-614	miRNA	30.3333	8	1	0	0	0	0
hsa-mir-615	miRNA	14945.8	1582	13253	216.5	224.5	36	477
hsa-mir-616	miRNA	1242.47	413.12	826.24	56	69	5.5	130.5
hsa-mir-617	miRNA	3	3	0	0	0	0	0
hsa-mir-618	miRNA	4526.67	4524.67	0	0	0	60	60
hsa-mir-619	miRNA	40.41	37.54	1	0.01	0.12	0.29	0.42
hsa-mir-620	miRNA	5.09667	3	0.5	3	0	0	3
hsa-mir-621	miRNA	50	10	2	0	0	0	0
hsa-mir-622	miRNA	18.2678	2.5	11.5	0	0	3.18553	3.18553
hsa-mir-623	miRNA	2	1	1	0	0	0	0
hsa-mir-624	miRNA	3654	2172	1480	8	0	12	20
hsa-mir-625	miRNA	17544.8	12292.5	5229	63.5	66	636.5	766
hsa-mir-627	miRNA	6376.33	5818.83	533.25	237.833	208	24	469.833
hsa-mir-628	miRNA	20666	18594	2054	263	164	223	650
hsa-mir-629	miRNA	85742.5	80622	5075	3995	4594	947	9536
hsa-mir-630	miRNA	4	0	3	0	0	0	0
hsa-mir-631	miRNA	5.5	0	4	0	0	1	1
hsa-mir-632	miRNA	266	28	143	0	0	0	0
hsa-mir-633	miRNA	7	7	0	0	0	0	0
hsa-mir-634	miRNA	1.33333	0	1.33	0	0	0	0
hsa-mir-635	miRNA	1	1	0	0	0	0	0
hsa-mir-636	miRNA	195.667	5	176	3	2	7	12
hsa-mir-637	miRNA	8	1	6	0	0	0	0
hsa-mir-638	miRNA	1	1	0	0	0	0	0
hsa-mir-639	miRNA	238.5	0.5	162	0	0	0	0
hsa-mir-640	miRNA	2.02	1	0	0	0	0	0
hsa-mir-641	miRNA	12217.5	11339.5	534	4	2	33	39
hsa-mir-642a	miRNA	3370.67	604.83	2765.83	1	1	3.5	5.5
hsa-mir-642b	miRNA	97.1667	1.83	95.33	0	0	0.5	0.5
hsa-mir-643	miRNA	1704	339	1365	20	4	6	30
hsa-mir-644	miRNA	1.83333	0.5	1	0	0	0	0
hsa-mir-645	miRNA	1	0	1	0	0	0	0
hsa-mir-646	miRNA	2.33333	0	2	0	0	0	0
hsa-mir-648	miRNA	1	1	0	0	0	0	0
hsa-mir-649	miRNA	0.0384615	0	0.04	0	0	0	0
hsa-mir-650	miRNA	53.0611	37.17	0	0	0	0	0
hsa-mir-651	miRNA	5502	5317.5	183.5	61	42	58	161
hsa-mir-652	miRNA	102060	5475	96359	1088	787	1944	3819
hsa-mir-653	miRNA	2384.33	1259.5	1124.83	0	0	617.167	617.167
hsa-mir-654	miRNA	11124.2	1738	9385.25	0	0	0	0
hsa-mir-655	miRNA	7754	49.5	7693.5	0	0	0	0
hsa-mir-656	miRNA	2136	53	2083	0	0	0	0
hsa-mir-657	miRNA	57	50	4	0	0	0	0
hsa-mir-658	miRNA	123	37	36	0	1	0	1
hsa-mir-659	miRNA	1750.5	1692	33	90.5	105	9	204.5
hsa-mir-660	miRNA	77351.5	74075	3153.5	151	161	229	541
hsa-mir-661	miRNA	1	0	0	0	0	0	0
hsa-mir-662	miRNA	35	2	31	9	0	0	9
hsa-mir-663	miRNA	1126.4	321	311	0	0	42.5	42.5
hsa-mir-663b	miRNA	247.902	2.5	187	0	0	1	1
hsa-mir-664	miRNA	83222.8	62091.5	20850	150	128	103	381
hsa-mir-665	miRNA	2304.7	32	2265.7	0	0	0	0
hsa-mir-668	miRNA	808	4	799	0	0	3	3
hsa-mir-670	miRNA	126	16	110	0	0	0	0
hsa-mir-671	miRNA	54115.4	50136.9	3804	190	384	83.9333	657.933
hsa-mir-675	miRNA	5854.17	4628	1133	1	1	1	3
hsa-mir-676	miRNA	1149	243	902	0	0	11	11
hsa-mir-7-1	miRNA	663439	618768	17892	861.333	620.083	5668.83	7150.25
hsa-mir-7-2	miRNA	615907	593180	166	796.333	587.083	5395.83	6779.25
hsa-mir-7-3	miRNA	610063	587097	632	790.333	586.083	5366.83	6743.25
hsa-mir-708	miRNA	133105	122033	10826.2	8	3	33.125	44.125
hsa-mir-711	miRNA	0.5	0.5	0	0	0	0	0
hsa-mir-718	miRNA	4	1	2	0	0	0	0
hsa-mir-720	miRNA	7255.45	7253.09	0.03	3.36364	5.06818	2.25	10.6818
hsa-mir-744	miRNA	335580	333891	1574	18265	11959	2320	32544
hsa-mir-758	miRNA	2883	2160	722	0	0	0	0
hsa-mir-760	miRNA	17457.3	60	17376.3	934	1613.33	185	2732.33
hsa-mir-761	miRNA	3	1	0	0	0	0	0
hsa-mir-764	miRNA	8	0	8	0	0	0	0
hsa-mir-765	miRNA	1241.45	1	1239.45	21	2	17.25	40.25
hsa-mir-766	miRNA	23805.5	16421.5	7255.98	49	64	1	114
hsa-mir-767	miRNA	19193	18254	870	3642	2835	4	6481
hsa-mir-769	miRNA	41472.1	37840	3507	965	1639	760	3364
hsa-mir-770	miRNA	194	87	105	0	0	0	0
hsa-mir-802	miRNA	25	11	14	0	0	0	0
hsa-mir-873	miRNA	22464	18567.5	3895.5	183.5	100.5	0	284
hsa-mir-874	miRNA	15159	1750	13398.5	6	5	1	12
hsa-mir-875	miRNA	3593	3495	98	0	0	0	0
hsa-mir-876	miRNA	4462.25	2891	1559.25	11	8	0	19
uc010rea.1_intron_1_0_chr11_32118884_f.3p	5p tailed mirtron candidate	32	16	8	0	0	0	0
hsa-mir-885	miRNA	22678.8	3809.83	18831	0	0	1.5	1.5
hsa-mir-887	miRNA	10226	337	9881	0	0	1	1
hsa-mir-888	miRNA	46357	44450	1902	0	0	0	0
hsa-mir-889	miRNA	39860	129	39728	0	0	3	3
hsa-mir-890	miRNA	65.5	45.5	20	0	0	0	0
hsa-mir-891a	miRNA	219	219	0	2	7	27	36
hsa-mir-891b	miRNA	18	18	0	0	0	0	0
hsa-mir-892a	miRNA	87	15	72	0	0	0	0
hsa-mir-892b	miRNA	17	4	13	0	0	0	0
hsa-mir-9-1	miRNA	271578	175407	96012.2	91.3333	28.3333	997.333	1117
hsa-mir-9-2	miRNA	271445	175402	96012.2	91.3333	28.3333	997.333	1117
hsa-mir-9-3	miRNA	256709	175573	81086.7	93.3333	28.3333	999.333	1121
hsa-mir-922	miRNA	8	2	0	0	0	0	0
hsa-mir-92a-1	miRNA	2048638	135525	1.91296e+06	70220.5	43921	12215	126356
hsa-mir-92a-2	miRNA	1817099	1161	1.81591e+06	68291.5	41823	11687	121802
hsa-mir-92b	miRNA	337728	37702	299997	14700	25402	5806	45908
hsa-mir-93	miRNA	1.63462e+06	1619231	14916.5	152976	108649	80471	342096
hsa-mir-933	miRNA	488.5	29	455.5	19	0	0	19
hsa-mir-934	miRNA	6324.5	5992.5	332	0	0	1	1
hsa-mir-935	miRNA	8585	25	8560	12	34	151	197
hsa-mir-936	miRNA	23	23	0	2	0	0	2
uc003tyk.1_intron_11_0_chr7_73020442_r.3p	5p tailed mirtron candidate	33	23	4	0	0	0	0
hsa-mir-938	miRNA	22	16	3	0	0	0	0
uc003gdr.3_intron_12_0_chr4_1807668_f	5p tailed mirtron candidate	33.3333	8	25.33	1	0	0	1
hsa-mir-940	miRNA	6612.25	55.67	6482.33	4.5	2	23	29.5
hsa-mir-941-1	miRNA	6609.83	0	6212.11	247	256.286	140	643.286
hsa-mir-941-3	miRNA	12578.1	6212.11	0	247	256.286	140	643.286
hsa-mir-941-4	miRNA	12573.9	0	0	0	0	0	0
hsa-mir-942	miRNA	7226.5	5822.5	1385	328	359	128	815
hsa-mir-943	miRNA	176	6	170	1	0	0	1
hsa-mir-944	miRNA	21308	41	21265	42	0	1	43
hsa-mir-95	miRNA	65660.7	161.68	65497	69	114.8	972.31	1156.11
hsa-mir-96	miRNA	193741	182946	642.5	2550	817	1121	4488
hsa-mir-98	miRNA	306142	299752	5522.5	4888	2192	12363	19443
hsa-mir-99a	miRNA	4281426	4269395	11992	17509	9711	105	27325
hsa-mir-99b	miRNA	3680492	3647139	33321	1431720	1213675	154106	2799501
uc003clf.2_intron_10_0_chr3_42576597_f	3p tailed mirtron candidate	34	31	3	0	0	1	1
uc010oaf.1_intron_10_0_chr1_9780720_f	5p tailed mirtron candidate	34	4	26	0	0	0	0
uc001tuq.3_intron_0_0_chr12_113596918_r.3p	5p tailed mirtron	35	19	10	6	0	0	6
uc001ujz.1_intron_10_0_chr12_132635914_f	5p tailed mirtron candidate	35	2	33	0	0	0	0
uc002ozx.3_intron_4_0_chr19_45397139_f	3p tailed mirtron candidate	35	28	2	0	1	0	1
uc004chz.2_intron_29_0_chr9_139414018_r.3p	5p tailed mirtron	36	35	1	0	0	0	0
uc001aea.2_intron_20_0_chr1_1238662_r.3p	5p tailed mirtron candidate	36.3333	20.83	14.5	0	0	0	0
uc002kde.2_intron_1_0_chr17_79982216_f	5p tailed mirtron candidate	36.3333	9	25	11	9	3	23
uc002mcx.2_intron_7_0_chr19_5696769_r.3p	5p tailed mirtron candidate	36.5	25	10	2	4	0	6
uc003ubo.2_intron_7_0_chr7_74438639_f	5p tailed mirtron candidate	36.5833	11.75	24.83	0	0	2	2
uc002whd.2_intron_15_0_chr20_2844934_f	mirtron candidate	37	6	30	0	0	1	1
uc010yfs.1_intron_4_0_chr19_55603913_r	5p tailed mirtron candidate	37.5	1	34	0	0	0	0
uc002gsp.2_intron_9_0_chr17_18138627_f	5p tailed mirtron candidate	38	29	8	1	0	1	2
uc003afq.2_intron_9_0_chr22_29924167_r	5p tailed mirtron candidate	38	35	3	1	0	2	3
uc010lhs.2_intron_4_0_chr7_100853443_r	5p tailed mirtron candidate	38	5	33	1	0	3	4
uc001aya.1_intron_2_0_chr1_16456915_r.3p	5p tailed mirtron candidate	39.45	35.25	4	0	0	0	0
uc001obx.2_intron_23_0_chr11_64675137_r	5p tailed mirtron candidate	39.5	35.5	4	11	1	3.5	15.5
uc002oam.1_intron_6_0_chr19_36108096_f	5p tailed mirtron candidate	39.5	16.5	23	0	0	0.5	0.5
uc010dtt.1_intron_14_0_chr19_4212696_f.3p	5p tailed mirtron candidate	40	28	11	6	0	1	7
uc010ncj.1_intron_16_0_chr9_140389599_r.3p	5p tailed mirtron candidate	40	3	37	0	0	0	0
uc001hsh.2_intron_6_0_chr1_228335401_f.3p	5p tailed mirtron candidate	40.3333	33	1	6	0	0	6
uc002mki.1_intron_6_0_chr19_8651606_r	5p tailed mirtron candidate	41	4	37	3	0	0	3
uc002yzo.2_intron_10_0_chr21_43243806_r.3p	5p tailed mirtron candidate	41	24	13	0	0	0	0
uc003zcj.2_intron_28_0_chr8_145625476_r	5p tailed mirtron	41.0058	19.65	17.5	0.037037	0	0.131111	0.168148
uc002okf.1_intron_4_0_chr19_39440977_r.3p	5p tailed mirtron candidate	42	1	41	28	4	0	32
uc003ykr.1_intron_35_0_chr8_103311776_r	5p tailed mirtron candidate	42	22	17	0	0	2	2
uc004bzr.1_intron_10_0_chr9_133499099_f.3p	5p tailed mirtron	42	26	12	2	3	0	5
uc002zww.2_intron_13_0_chr22_23632601_f.3p	5p tailed mirtron candidate	42.01	38	3	9	0	3	12
uc001nzb.2_intron_2_0_chr11_64022289_f	mirtron candidate	43	35	7	2	0	0	2
uc001odu.3_intron_3_0_chr11_65161146_f	5p tailed mirtron candidate	43	39	3	5	2	0	7
uc001ubi.2_intron_4_0_chr12_122248742_f.3p	5p tailed mirtron candidate	43	41	2	0	0	0	0
uc010wsc.1_intron_7_0_chr17_73500562_r	mirtron candidate	43	42	1	18	2	1	21
uc001ako.2_intron_4_0_chr1_3551639_r	mirtron candidate	43.5	42.5	1	12	0	0	12
uc001okc.1_intron_13_0_chr11_67069123_f	5p tailed mirtron candidate	43.5	19	20	3	0	0	3
uc001att.2_intron_2_0_chr1_12251143_f.3p	5p tailed mirtron	44	6	38	0	0	0	0
uc010zvj.1_intron_11_0_chr20_34220157_r	5p tailed mirtron candidate	44	4	40	0	0	0	0
uc010xqt.1_intron_1_0_chr19_19576424_f.3p	5p tailed mirtron candidate	44.2	12	32	0	0	0	0
uc004bvw.2_intron_9_0_chr9_131476401_f	mirtron candidate	44.5	40	4	16	0	0	16
uc001ksp.2_intron_8_0_chr10_102797189_f.3p	5p tailed mirtron candidate	44.55	15.3	29.25	0	0	2.25	2.25
uc002gqu.1_intron_15_0_chr17_17075180_f.3p	5p tailed mirtron candidate	45	42	3	0	0	4	4
uc010xlk.1_intron_2_0_chr19_11213463_f.3p	5p tailed mirtron candidate	45	34	8	8	7	1	16
uc001bny.1_intron_0_0_chr1_27681961_r	5p tailed mirtron candidate	45.1429	22	23	0	0	0	0
uc002cos.1_intron_0_0_chr16_2140196_r	mirtron	45.5	30	8	0	0	21	21
uc002jlo.2_intron_0_0_chr17_72745427_f.3p	5p tailed mirtron candidate	45.5	17.5	17	0	1	6.5	7.5
uc001clg.2_intron_4_0_chr1_44451073_f	5p tailed mirtron candidate	45.7262	13.73	30	0	1	1	2
uc010bsb.1_intron_3_0_chr16_2025440_f	mirtron candidate	46	37	3	15	0	8	23
uc002ozy.3_intron_0_0_chr19_45394572_f	5p tailed mirtron candidate	46.5	16	17	0	0	0	0
uc001rsh.3_intron_3_0_chr12_49165757_r	5p tailed mirtron	47	20	25	0	0	1.5	1.5
uc001uiz.1_intron_7_0_chr12_132237909_f.3p	5p tailed mirtron candidate	47	8	39	0	3	0	3
uc009zpl.2_intron_1_0_chr12_57638009_r	5p tailed mirtron candidate	47	32	10	0	4	0	4
uc002imz.3_intron_3_0_chr17_46134484_f	5p tailed mirtron candidate	47.025	37	6	0	0	0	0
uc002seu.2_intron_9_0_chr2_69050005_f.3p	5p tailed mirtron candidate	47.25	22	24.25	0	0	0	0
uc002muf.1_intron_2_0_chr19_12788026_r	5p tailed mirtron candidate	48	3	45	2	0	0	2
uc002xbv.1_intron_0_0_chr20_33867010_r	5p tailed mirtron candidate	48	38	6	0	0	0	0
uc002oxj.2_intron_3_0_chr19_44237886_r.3p	5p tailed mirtron candidate	48.75	44.75	2	1	1	3	5
uc002fzo.1_intron_5_0_chr17_4842271_r	5p tailed mirtron candidate	49	37	9	3	2	2	7
uc002kdg.2_intron_1_0_chr17_79994185_r	3p tailed mirtron candidate	49	10	38	0	0	2	2
uc002mwj.2_intron_8_0_chr19_13220816_r	5p tailed mirtron candidate	49	43	3	11	1	0	12
uc002oou.1_intron_2_0_chr19_41250102_r	5p tailed mirtron candidate	49	21	21	0	0	0	0
uc002oxj.2_intron_4_0_chr19_44238648_r.3p	5p tailed mirtron candidate	49	34	14	11	9	0	20
uc010wsc.1_intron_11_0_chr17_73502011_r	5p tailed mirtron candidate	49	10	27	7	0	0	7
uc010cwp.1_intron_5_0_chr17_38241069_f.3p	5p tailed mirtron candidate	49.0333	16.03	31	1	0	1	2
uc002clv.2_intron_14_0_chr16_1505797_r	5p tailed mirtron candidate	49.1667	38	9	4	0	0	4
uc002elz.1_intron_7_0_chr16_57690184_f	5p tailed mirtron candidate	49.8333	35.33	9	4.33333	2	4.66667	11
uc001war.1_intron_28_0_chr14_21881156_r.3p	5p tailed mirtron candidate	50	34	14	1	8	0	9
uc002cvv.2_intron_4_0_chr16_3786817_r.3p	5p tailed mirtron candidate	50	1	49	0	0	0	0
uc003mhh.3_intron_2_0_chr5_176932112_r.3p	5p tailed mirtron candidate	50	2	48	0	0	2	2
uc010cyj.2_intron_9_0_chr17_40717824_f	5p tailed mirtron candidate	50	44	4	3	0	0	3
uc010yel.1_intron_7_0_chr19_54649554_f	5p tailed mirtron candidate	50	16	33	0	0	0	0
uc004ars.1_intron_6_0_chr9_95005594_r.3p	5p tailed mirtron candidate	51	1	49	7	0	0	7
uc001bnz.1_intron_6_0_chr1_27687330_r	mirtron candidate	52	50	1	8	3	17	28
uc002cqh.2_intron_7_0_chr16_2512734_f.3p	5p tailed mirtron	52	42	10	0	1	9	10
uc004ayq.2_intron_8_0_chr9_100991431_r.3p	5p tailed mirtron	52.069	35	17	0	0	0	0
uc001obw.2_intron_13_0_chr11_64669859_r	5p tailed mirtron	52.3333	22	30.33	10	11	0	21
uc002chm.2_intron_1_0_chr16_624764_f.3p	5p tailed mirtron candidate	53	40	8	5	7	3	15
uc002gjp.2_intron_18_0_chr17_7852476_f	5p tailed mirtron candidate	53	34	3	3	4	0	7
uc002mgu.3_intron_16_0_chr19_7682325_f	3p tailed mirtron	53	46	7	0	0	0	0
uc003cqp.2_intron_17_0_chr3_47038537_f	5p tailed mirtron candidate	54	47	4	1	0	1	2
uc002giw.1_intron_12_0_chr17_7753496_f.3p	5p tailed mirtron	55	40	10	0	0	0	0
uc003kwg.2_intron_12_0_chr5_131553542_r.3p	5p tailed mirtron	55.5	48.5	7	0	0	0	0
uc001kva.2_intron_14_0_chr10_104159952_f	5p tailed mirtron candidate	56	51	2	0	1	0	1
uc002yzn.1_intron_3_0_chr21_43166932_r.3p	5p tailed mirtron	56	19	37	1	0	3	4
uc001txo.2_intron_52_0_chr12_120616754_r.3p	5p tailed mirtron candidate	56.5	41	12	0	1	0	1
uc001okr.2_intron_2_0_chr11_67160254_f.3p	5p tailed mirtron candidate	57	17	35	0	1	1	2
uc002eux.1_intron_5_0_chr16_67970216_r	mirtron candidate	57	15	33	5	0	1	6
uc001bqa.1_intron_8_0_chr1_28861893_f	5p tailed mirtron candidate	58	42	8	0	0	0	0
uc001oqm.2_intron_6_0_chr11_71184413_f	5p tailed mirtron	58	38	19	1	0	0	1
uc003fgx.2_intron_0_0_chr3_170137081_f.3p	5p tailed mirtron	58	53	5	0	0	0	0
uc010rnu.1_intron_1_0_chr11_64785947_f	5p tailed mirtron	58.75	17.5	39	0	0	0	0
uc002cow.2_intron_6_0_chr16_2221607_f.3p	5p tailed mirtron candidate	59	10	47	0	0	0	0
uc002gad.2_intron_0_0_chr17_4862939_r	5p tailed mirtron	59	12	44	0	0	0	0
uc002iib.2_intron_4_0_chr17_43191735_r.3p	5p tailed mirtron	59	25	34	29	4	0	33
uc002lvf.1_intron_3_0_chr19_2235828_r	mirtron	59	33	26	1	0	0	1
uc003yvn.2_intron_11_0_chr8_141567336_r.3p	5p tailed mirtron candidate	59	2	57	2	0	0	2
uc003alk.2_intron_3_0_chr22_32017459_r	5p tailed mirtron	60	13	42	0	11	0	11
uc003oql.2_intron_15_0_chr6_41565689_f.3p	5p tailed mirtron	60	2	58	0	0	0	0
uc003yzv.2_intron_6_0_chr8_144919928_r.3p	5p tailed mirtron	60.3333	50	9.33	7	4	0	11
uc004fjr.1_intron_12_0_chrX_153285050_r	5p tailed mirtron candidate	60.5	22	24	7	7	0	14
uc002dzs.1_intron_1_0_chr16_30795837_r.3p	5p tailed mirtron candidate	61	43	18	0	1	5	6
uc003aes.3_intron_6_0_chr22_29683124_f.3p	5p tailed mirtron candidate	61	14	41	0	0	2	2
uc003cum.2_intron_7_0_chr3_48717663_r.3p	5p tailed mirtron candidate	61	29.5	29	0	7	0	7
uc011llg.1_intron_8_0_chr8_145660934_r	5p tailed mirtron	61.5	50.5	11	0	0	5	5
uc001neq.2_intron_2_0_chr11_47296711_f.3p	5p tailed mirtron candidate	62.5	54	5.5	1	0	0	1
uc002pyp.2_intron_11_0_chr19_52724387_f.3p	5p tailed mirtron	63	50	10	0	0	0	0
uc010vuq.1_intron_4_0_chr17_8048312_r.3p	5p tailed mirtron	63.5	17	37.5	0	2	0	2
uc002cxa.2_intron_7_0_chr16_4718314_f.3p	5p tailed mirtron	65	43	22	0	0	0	0
uc002meq.2_intron_11_0_chr19_6392915_r	3p tailed mirtron	65	56	5	0	3	1	4
uc010zyo.1_intron_2_0_chr20_48562026_f.3p	5p tailed mirtron candidate	65	59	5	3	0	0	3
uc001cbb.3_intron_1_0_chr1_37941541_f.3p	5p tailed mirtron	66.0417	27	37	3	0	3	6
uc001fge.1_intron_4_0_chr1_154962734_f	3p tailed mirtron	66.3333	50.33	7	0	0	3.33333	3.33333
uc010hlh.1_intron_5_0_chr3_50308912_f.3p	5p tailed mirtron	68	60	6	14	7	16	37
uc001fpr.2_intron_2_0_chr1_156670845_r.3p	5p tailed mirtron candidate	68.25	65.25	3	0	0	9	9
uc003egc.1_intron_15_0_chr3_122880303_f	5p tailed mirtron	68.39	15	47	2.5	4.5	4.5	11.5
uc002fux.1_intron_6_0_chr17_2596155_r.3p	5p tailed mirtron	68.5	33.5	31	17	6	0	23
uc002emm.2_intron_16_0_chr16_57806201_r.3p	5p tailed mirtron	69	41	26	3	21	0	24
uc003cjc.2_intron_25_0_chr3_39179202_f.3p	5p tailed mirtron	69	66	3	0	0	1	1
uc011mel.1_intron_23_0_chr9_139909263_r	5p tailed mirtron candidate	69	10	3	0	0	0	0
uc010gcd.1_intron_13_0_chr20_10630284_r.3p	5p tailed mirtron	70	6	64	0	0	0	0
uc003lam.1_intron_6_0_chr5_134705833_r.3p	5p tailed mirtron candidate	70.5	6.5	63	2	0	1	3
uc001nvd.3_intron_3_0_chr11_62557152_f	5p tailed mirtron	71	47	16	1	5	0	6
uc003zcj.2_intron_29_0_chr8_145625671_r	5p tailed mirtron	71	45	26	10	16	0	26
uc002dcx.3_intron_4_0_chr16_15024613_f	5p tailed mirtron	71.7857	32.71	33.67	0	0	0.809524	0.809524
uc010vad.1_intron_1_0_chr16_16423098_f	5p tailed mirtron candidate	71.7857	32.71	33.67	0	0	0.809524	0.809524
uc002ibn.2_intron_10_0_chr17_40975898_r	5p tailed mirtron	72	38	27	0	0	3	3
uc003apg.2_intron_6_0_chr22_36682893_r.3p	5p tailed mirtron	72	23	47	4	0	0	4
uc011lxl.1_intron_59_0_chr9_117071759_f.3p	5p tailed mirtron candidate	72.8333	66.33	5.5	0	0	0	0
uc001lof.2_intron_1_0_chr11_209319_f	5p tailed mirtron	75	8	66	0	0	0	0
uc009zwc.2_intron_1_0_chr12_112601069_r	5p tailed mirtron	75	33	42	0	0	0	0
uc003buw.2_intron_19_0_chr3_10103896_f.3p	5p tailed mirtron candidate	75.5333	62.2	11.33	0.5	9	2	11.5
uc002qcs.1_intron_2_0_chr19_54483262_f.3p	5p tailed mirtron candidate	75.7697	68.88	4	0	0	36.881	36.881
uc002evq.1_intron_10_0_chr16_68267329_r	5p tailed mirtron	76	60	4	1	1	5	7
uc003bjb.2_intron_4_0_chr22_50356514_f	mirtron	76	68	6	6	0	10	16
uc010juo.1_intron_1_0_chr6_33255004_r	5p tailed mirtron	76.1497	57	19.15	6	3.33333	3.04878	12.3821
uc002kbg.2_intron_9_0_chr17_79660783_f	5p tailed mirtron	76.25	14	62	8	17	0	25
uc010zcm.1_intron_14_0_chr2_160042411_f.3p	5p tailed mirtron	77.4	15	62	2	0	0	2
uc002kea.2_intron_1_0_chr17_80194108_f	5p tailed mirtron	77.5	35	28	11	7	0	18
uc002bns.3_intron_14_0_chr15_89869970_r	5p tailed mirtron	78	31	47	0	0	1	1
uc003cuf.1_intron_19_0_chr3_48671069_r.3p	5p tailed mirtron	79	48	28	0	7	0	7
uc009xbu.1_intron_3_0_chr1_206647815_f	5p tailed mirtron	79	38	40	7	3	2	12
uc010ulk.1_intron_1_0_chr15_74703698_r	5p tailed mirtron	79	53	24	0	2	0	2
uc002dzz.1_intron_8_0_chr16_30953858_f.3p	5p tailed mirtron candidate	79.5	65	14	4	3	0	7
uc010gac.2_intron_3_0_chr20_1373526_r	3p tailed mirtron	79.5	61	12.5	6	3	4	13
uc011lio.1_intron_6_0_chr8_125579420_r.3p	5p tailed mirtron candidate	80.5	58	22.5	0	0	0	0
uc002nxk.2_intron_1_0_chr19_35500234_f.3p	5p tailed mirtron candidate	81	5	74	0	2	0	2
uc010scp.1_intron_5_0_chr11_134131074_f	5p tailed mirtron candidate	81	77	4	0	0	0	0
uc001olv.2_intron_3_0_chr11_67257686_f	5p tailed mirtron	81.3333	34.33	44.33	9	15	1.33333	25.3333
uc003zbv.3_intron_3_0_chr8_145540916_r	5p tailed mirtron	82	70	12	0	0	0	0
uc002fyj.2_intron_6_0_chr17_4621048_f	5p tailed mirtron candidate	83.5	9.5	74	0	0	1	1
uc010xsl.1_intron_4_0_chr19_35612150_f.3p	5p tailed mirtron	83.5	37.5	45	0	0	1	1
uc002egb.1_intron_3_0_chr16_50325809_f.3p	5p tailed mirtron	84	80	4	0	4	0	4
uc002ieh.2_intron_14_0_chr17_41907476_r.3p	5p tailed mirtron candidate	85	1	84	4	3	0	7
uc003oit.2_intron_1_0_chr6_34205095_f.3p	5p tailed mirtron	85	79	3	5	3	0	8
uc010cgn.1_intron_2_0_chr16_72132945_f	5p tailed mirtron candidate	85.5333	78	3	4	1	0	5
uc011moc.1_intron_6_0_chrX_53224593_r.3p	5p tailed mirtron	86	43	38	0	0	7	7
uc002gta.2_intron_6_0_chr17_18244128_r.3p	5p tailed mirtron	86.5	75.5	6	1	2	0	3
uc001ndw.2_intron_4_0_chr11_47201138_r.3p	5p tailed mirtron	86.75	0	85.25	5	0	1	6
uc009zbe.1_intron_10_0_chr11_123479511_f.3p	5p tailed mirtron candidate	87	85	2	14	13	0	27
uc002cos.1_intron_33_0_chr16_2162965_r	5p tailed mirtron candidate	87.0833	4	77	0	0	1	1
uc002fjh.2_intron_5_0_chr16_85948127_f.3p	5p tailed mirtron	87.5	18.5	66	0	0	0	0
uc009whm.2_intron_3_0_chr1_120267093_f	5p tailed mirtron candidate	87.97	85	2	0	0	0	0
uc001yqf.2_intron_14_0_chr14_105617115_r	mirtron	88	30	58	31	0	0	31
uc002ign.2_intron_0_0_chr17_42397485_r	3p tailed mirtron candidate	88.2	4.2	72	35	8	4	47
uc002dkj.1_intron_14_0_chr16_22335735_f	5p tailed mirtron candidate	88.9583	52.96	24	0	0	0	0
uc003xfx.1_intron_7_0_chr8_27468118_r.3p	5p tailed mirtron	89	16	69	7	12	1	20
uc003lgc.1_intron_8_0_chr5_139943256_r	mirtron	89.5	85	4	2	0	3	5
uc003zbm.3_intron_2_0_chr8_145317576_r	5p tailed mirtron	90.5	14.5	70.5	0	0	0.5	0.5
uc011czi.1_intron_6_0_chr5_139942085_r.5p	3p tailed mirtron candidate	90.5	85	4	2	0	3	5
uc004fju.2_intron_6_0_chrX_153284239_r	5p tailed mirtron candidate	91	4	84	2	1	1	4
uc010rxe.1_intron_2_0_chr11_117052688_f	mirtron candidate	91	88	2	18	0	5	23
uc003ctv.2_intron_11_0_chr3_48587394_r	5p tailed mirtron	93	89	4	10	0	1	11
uc003eqg.1_intron_7_0_chr3_134086646_r.3p	5p tailed mirtron	93	74.5	16.5	0	0	0	0
uc010tax.1_intron_8_0_chr12_124821727_r.3p	5p tailed mirtron	93.2	54.2	39	7	0	1	8
uc009vjd.2_intron_3_0_chr1_17369_r	5p tailed mirtron	94.877	86.4	5.32	3	2	2.16071	7.16071
uc001fdn.3_intron_5_0_chr1_153945555_f	5p tailed mirtron candidate	95	86	9	0	0	11	11
uc001sbd.2_intron_2_0_chr12_53292684_r.3p	5p tailed mirtron candidate	95.59	1.5	93	0	0	3	3
uc010utu.1_intron_5_0_chr15_102513556_f	5p tailed mirtron candidate	95.9484	86.4	5.32	3	2	2.16071	7.16071
uc001fdh.2_intron_1_0_chr1_153934827_r	5p tailed mirtron	96	4	92	0	4	0	4
uc002mgo.2_intron_12_0_chr19_7598540_f	5p tailed mirtron candidate	96	83	8	27	27	1	55
uc003slw.2_intron_2_0_chr7_2297150_r	5p tailed mirtron	96	56	37	2	0	1	3
uc003xee.2_intron_2_0_chr8_24811310_r	5p tailed mirtron	96.5	90.5	6	0	0	0	0
uc002jup.2_intron_14_0_chr17_76135322_f.3p	shrna candidate	565	12	529	0	9	0	9
uc003dap.2_intron_6_0_chr3_50403595_r	mirtron candidate	96.75	95.75	1	0	0	0	0
uc001tux.2_intron_23_0_chr12_113728804_f.3p	5p tailed mirtron	97	17.5	79.5	0	0	0	0
uc002pcg.2_intron_11_0_chr19_46029262_f	5p tailed mirtron candidate	97.2857	93.29	3	2	1	0	3
uc003mtz.2_intron_4_0_chr6_2783796_f.3p	5p tailed mirtron	98	5	87	54	6	5	65
uc001qnt.2_intron_0_0_chr12_6438789_r	5p tailed mirtron candidate	98.3333	2	96	0	0	2	2
uc001uje.2_intron_5_0_chr12_132393363_f	5p tailed mirtron candidate	99	1	97	1	10	4	15
uc009yqd.1_intron_11_0_chr11_64973193_f.3p	5p tailed mirtron candidate	99.3333	94.33	5	10	0	0	10
uc002ppw.1_intron_10_0_chr19_50335279_f	mirtron	99.5256	29	60	10	0	1	11
uc003cxr.2_intron_2_0_chr3_49843599_r.3p	5p tailed mirtron candidate	100	3	97	0	0	0	0
uc001ynf.1_intron_4_0_chr14_103988288_r	5p tailed mirtron candidate	100.992	77.66	22	0	1.16667	0.0555556	1.22222
uc001nkm.1_intron_0_0_chr11_57296392_r.3p	5p tailed mirtron candidate	101	96	3	8	0	0	8
uc001orw.2_intron_0_0_chr11_71820975_r	5p tailed mirtron candidate	102.091	90.09	11	0	0	0.0909091	0.0909091
uc001ncg.2_intron_2_0_chr11_46342080_f	5p tailed mirtron candidate	104.5	96.5	5	0	0	0	0
uc001obw.2_intron_8_0_chr11_64665835_r	5p tailed mirtron	104.5	81	22	5	0	0	5
uc010luf.1_intron_24_0_chr8_25200024_f.3p	5p tailed mirtron	104.5	97.5	7	0	0	4	4
uc003zxv.2_intron_0_0_chr9_35732899_f	5p tailed mirtron	105	4	99	0	7	0	7
uc010cku.1_intron_4_0_chr17_4872997_r	5p tailed mirtron	105	97	7	0	0	0	0
uc001nsm.2_intron_6_0_chr11_61645688_r	5p tailed mirtron	105.167	61.67	41	0	1	1	2
uc002cof.1_intron_3_0_chr16_2050258_r	5p tailed mirtron candidate	106	6	98	0	0	0	0
uc002qlt.2_intron_9_0_chr19_56180536_f	5p tailed mirtron candidate	106	102	1	5	4	3	12
uc001gvr.1_intron_17_0_chr1_200960854_r.3p	5p tailed mirtron candidate	107	102	5	0	0	1	1
uc002lrj.3_intron_25_0_chr19_1123639_r	5p tailed mirtron candidate	107	2	103	31	13	1	45
uc003zar.3_intron_17_0_chr8_145112224_r	5p tailed mirtron	107	97	10	14	14	1	29
uc002igb.2_intron_2_0_chr17_42285139_r	5p tailed mirtron	108	72	35	34	27	6	67
uc002pls.1_intron_6_0_chr19_49513129_f	5p tailed mirtron	108	18	90	14	2	1	17
uc001fxk.2_intron_4_0_chr1_161022154_r	mirtron candidate	109	1	108	0	0	0	0
uc003ouy.1_intron_2_0_chr6_43401099_f.3p	5p tailed mirtron	109.333	43.83	65	0	0	1	1
uc002lvy.2_intron_6_0_chr19_2434912_r	mirtron	109.554	89.5	20	2	4	13.5	19.5
uc002qjv.2_intron_2_0_chr19_55742253_r.3p	5p tailed mirtron	111	100	10	22	1	1	24
uc010ksz.1_intron_4_0_chr7_5751471_r.3p	5p tailed mirtron	111	74	37	18	11	1	30
uc002nan.2_intron_11_0_chr19_15290094_r	5p tailed mirtron	113	41	72	0	0	2	2
uc002nyr.1_intron_2_0_chr19_35760603_f.3p	5p tailed mirtron candidate	114	53	22	6	6	0	12
uc002quu.2_intron_5_0_chr1_1275030_r	5p tailed mirtron	114	4	110	16	1	1	18
uc001spv.2_intron_0_0_chr12_58142401_r.3p	5p tailed mirtron	114.232	98.45	4	10	0	1	11
uc002xoh.1_intron_10_0_chr20_44053220_f.3p	5p tailed mirtron	116.5	52	59.5	11	11	2.5	24.5
uc010sly.1_intron_8_0_chr12_49219553_f.3p	5p tailed mirtron candidate	116.5	110.5	6	5	2	2.5	9.5
uc010xss.1_intron_3_0_chr19_35760907_f	5p tailed mirtron candidate	118.083	53	22	6	6	0	12
uc001pwf.2_intron_10_0_chr11_119183660_r.3p	5p tailed mirtron	118.5	46	69.5	6.5	7	1	14.5
uc003els.2_intron_18_0_chr3_128990753_f	5p tailed mirtron	119.083	91.08	28	0	6	2	8
uc003mim.2_intron_8_0_chr5_177574637_f	5p tailed mirtron candidate	119.5	108.5	9	0	0	5	5
uc010ggf.2_intron_3_0_chr20_39797511_f	5p tailed mirtron	121	85	34	8	7	1	16
uc001qds.2_intron_7_0_chr11_126278392_f.3p	5p tailed mirtron candidate	122	112	7	0	0	3	3
uc002hcs.2_intron_4_0_chr17_27075442_f	5p tailed mirtron candidate	122	78	23	2	0	0	2
uc002tra.1_intron_4_0_chr2_131103273_f	5p tailed mirtron candidate	123	30	88	0	3	2	5
uc001dxa.3_intron_16_0_chr1_109810683_f.3p	5p tailed mirtron candidate	123.5	121.5	2	60	21	5	86
uc002jni.1_intron_10_0_chr17_73238555_r	5p tailed mirtron candidate	125	28	96	3	4	2	9
uc010bsa.1_intron_1_0_chr16_2012658_r	mirtron candidate	126.643	111.64	14	0	1	1	2
uc002pem.2_intron_9_0_chr19_46891706_f	5p tailed mirtron	127	95	12	0	2	8	10
uc010dgv.1_intron_13_0_chr17_74094100_r.3p	5p tailed mirtron	127.03	4	122	4	2	17	23
uc011mex.1_intron_2_0_chr9_140344478_r	5p tailed mirtron	127.75	82.75	44	4	0	1	5
uc011bcd.1_intron_9_0_chr3_49137287_r	5p tailed mirtron	128.516	120	2.5	30	12	3	45
uc001sbl.2_intron_9_0_chr12_53449630_f.3p	5p tailed mirtron	129.833	101.83	27	0	0	0	0
uc001ztb.2_intron_2_0_chr15_44092983_f	5p tailed mirtron candidate	130	101	6	21	2	0	23
uc010cku.1_intron_5_0_chr17_4873381_r	5p tailed mirtron	132.643	119.5	3	0	0	0	0
uc010dsq.2_intron_0_0_chr19_1816154_r	3p tailed mirtron	133.333	34	98.33	0	0	1	1
uc001tsa.1_intron_8_0_chr12_111736394_f.3p	5p tailed mirtron	134.143	98	34.14	0	0	0	0
uc002onm.3_intron_5_0_chr19_40873787_f.3p	5p tailed mirtron	134.333	103	31.33	5	11	2	18
uc011bmv.1_intron_13_0_chr3_139092255_r	5p tailed mirtron candidate	135.25	125.25	4	6	11	0	17
uc002asd.1_intron_2_0_chr15_69747627_f	mirtron candidate	136	2	127	0	0	0	0
uc001dbo.1_intron_20_0_chr1_65141667_f.3p	5p tailed mirtron candidate	137.018	135	1	0	0	0	0
uc001odb.2_intron_2_0_chr11_64897388_r	5p tailed mirtron	142	72	70	0	6	0	6
uc011aoz.1_intron_4_0_chr22_41648996_r.3p	5p tailed mirtron	142.5	109	31	17	7	0	24
uc002smi.1_intron_0_0_chr2_74757640_f	shrna candidate	45.3333	34.33	9	0	0	1	1
uc001aee.1_intron_3_0_chr1_1247882_r	5p tailed mirtron	142.555	115.5	23	1	0	1	2
uc003zab.1_intron_4_0_chr8_145001504_r	3p tailed mirtron candidate	143	72	59	3.5	1	46	50.5
uc003upz.2_intron_5_0_chr7_98988723_f	5p tailed mirtron candidate	143.5	100.5	32	5	0	23.5	28.5
uc004cpu.2_intron_2_0_chrX_1508621_r	5p tailed mirtron candidate	145.146	106.5	11.5	26	11	0.5	37.5
uc004fph.2_intron_2_0_chrY_1458621_r	5p tailed mirtron candidate	145.146	106.5	11.5	26	11	0.5	37.5
uc001jvb.2_intron_0_0_chr10_75541958_f	5p tailed mirtron candidate	145.833	109.83	32	1	0	2	3
uc001kuo.2_intron_1_0_chr10_103916832_f	5p tailed mirtron candidate	146	144	2	3	2	3	8
uc001kuq.2_intron_1_0_chr10_103916832_f	5p tailed mirtron candidate	146	144	2	3	2	3	8
uc002mfo.3_intron_16_0_chr19_6736723_r	5p tailed mirtron	146.25	46.25	93	3	2	0	5
uc001yfc.3_intron_1_0_chr14_96178140_r	5p tailed mirtron candidate	147.05	142	1.05	0	0	0.03	0.03
uc001hss.2_intron_1_0_chr1_228584749_r	5p tailed mirtron	148	31	116	3	4	8	15
uc011lpt.1_intron_0_0_chr9_36840634_r.3p	5p tailed mirtron candidate	149	147	2	0	0	0	0
uc003dej.2_intron_63_0_chr3_52557358_f	5p tailed mirtron candidate	150.5	20.5	129	0	0	0	0
uc001ato.1_intron_4_0_chr1_12089199_f	5p tailed mirtron	152	127	20	2	0	1	3
uc003atr.2_intron_19_0_chr22_38165195_f	mirtron candidate	153	3	150	0	0	3	3
uc001one.2_intron_8_0_chr11_67811812_f.3p	5p tailed mirtron	154.067	0	153	0	3	1	4
uc001ont.2_intron_5_0_chr11_68154181_f.3p	5p tailed mirtron candidate	155.5	139	13.5	6.5	0	6	12.5
uc010cwu.1_intron_13_0_chr17_38349670_f	5p tailed mirtron	155.583	149	3	0	0	2	2
uc002cos.1_intron_37_0_chr16_2166120_r	5p tailed mirtron	155.733	140	9.33	29	22	4.5	55.5
uc003odt.1_intron_2_0_chr6_33258022_f	mirtron	157	131	24	14	49	3	66
uc001ukf.2_intron_14_0_chr12_133158411_f	5p tailed mirtron	157.238	143.24	13	5	4.5	0.142857	9.64286
uc001ady.2_intron_7_0_chr1_1231490_r	5p tailed mirtron	159	44	114	0	12	1	13
uc002ort.2_intron_3_0_chr19_42373285_f	5p tailed mirtron	159.143	101.14	52	17	2	2	21
uc011mbg.1_intron_9_0_chr9_131342018_f.3p	5p tailed mirtron candidate	160	149	11	3	0	0	3
uc002vgu.3_intron_12_0_chr2_218765236_r.3p	5p tailed mirtron	163.182	138.92	21.26	0	0	0	0
uc003lcf.1_intron_18_0_chr5_137503768_r.3p	5p tailed mirtron candidate	164.5	161.5	2	20	17	1	38
uc003bjb.2_intron_2_0_chr22_50355017_f	5p tailed mirtron candidate	164.803	84.57	61	0	0.01	46.54	46.55
uc002hcq.1_intron_1_0_chr17_27074283_f.3p	5p tailed mirtron candidate	166	66	8	19	3	0	22
uc001mjb.2_intron_15_0_chr11_10825751_r	mirtron candidate	168.5	7	148	0	0	0	0
uc010pcd.1_intron_4_0_chr1_150464139_f.3p	5p tailed mirtron	170	160	9	4	0	0	4
uc001ygy.1_intron_3_0_chr14_100742986_f.3p	5p tailed mirtron	170.5	149.5	19	0	0	5	5
uc001pbp.2_intron_10_0_chr11_85989034_f	5p tailed mirtron	173	149	19	7	2	13	22
uc001uyj.2_intron_0_0_chr13_42142442_r.3p	5p tailed mirtron	173	13	158	0	2	1	3
uc004dsg.2_intron_14_0_chrX_53432605_r	5p tailed mirtron	174	26	145	7	7	2	16
uc001amh.2_intron_3_0_chr1_6270031_f	5p tailed mirtron candidate	177	0	177	22	20	3	45
uc002mvk.2_intron_9_0_chr19_12963062_f	5p tailed mirtron	177	169	7	36	63	3	102
uc010lgo.2_intron_1_0_chr7_99753079_r	5p tailed mirtron candidate	177	15	155	0	0	0	0
uc001oad.2_intron_10_0_chr11_64136074_f	5p tailed mirtron	179	11	168	1	0	2	3
uc002flp.3_intron_2_0_chr16_88782686_r	5p tailed mirtron	179.75	137.75	1	0	0	0	0
uc003oeo.1_intron_7_0_chr6_33406069_f	5p tailed mirtron	181.5	145.5	34	7	1	0	8
uc001fmr.2_intron_2_0_chr1_155921064_r	5p tailed mirtron	182.5	109	71	3	10	0	13
uc001xls.1_intron_2_0_chr14_70420250_f.3p	5p tailed mirtron candidate	182.5	180.5	2	0	126	0	126
uc010rpz.1_intron_2_0_chr11_67799804_f.3p	5p tailed mirtron	182.75	165.75	15	0	1	12	13
uc011bvq.1_intron_57_0_chr4_3227471_f.3p	5p tailed mirtron candidate	183	179	2	0	1	0	1
uc003slx.2_intron_1_0_chr7_2400538_f.3p	5p tailed mirtron candidate	184	177	1	0	0	0	0
uc002vws.2_intron_3_0_chr2_238419439_f	5p tailed mirtron	185.497	155	5	0	0	2	2
uc003tkb.2_intron_11_0_chr7_44150409_f	5p tailed mirtron	186	77	103	0	0	0	0
uc003abu.2_intron_0_0_chr22_25844252_f.3p	5p tailed mirtron	187.5	8	178.5	9	1	1.5	11.5
uc002ycq.2_intron_52_0_chr20_60907537_r	3p tailed mirtron	189	104	58	0	0	8	8
uc001gwz.2_intron_12_0_chr1_201828123_f.3p	5p tailed mirtron	189.271	111.36	71	9	1	3	13
uc010yvj.1_intron_19_0_chr2_99181227_f.3p	5p tailed mirtron candidate	193.5	185.5	1	20	3	1	24
uc003dby.2_intron_4_0_chr3_51978927_f	5p tailed mirtron candidate	194.5	1	193.33	55	57	3	115
uc003tjt.2_intron_0_0_chr7_44112977_r	5p tailed mirtron	194.5	128	62.5	0	0	4	4
uc002ufv.2_intron_22_0_chr2_171300557_f.3p	5p tailed mirtron candidate	198	0	198	0	0	0	0
uc002iht.2_intron_10_0_chr17_43011986_r	5p tailed mirtron	199.333	132	44.33	15	24	4	43
uc010xxf.1_intron_10_0_chr19_45494204_f	5p tailed mirtron candidate	199.5	197	1	0	0	0	0
uc003mhm.2_intron_8_0_chr5_176941839_r	shrna candidate	195.833	22.83	136	0	0	1	1
uc002hba.2_intron_3_0_chr17_26687595_f	5p tailed mirtron	200	154	32	0	4	0	4
uc003fvs.1_intron_8_0_chr3_195609200_r.3p	5p tailed mirtron	200	193	7	1.5	11	3	15.5
uc003mik.1_intron_1_0_chr5_177546915_f	5p tailed mirtron candidate	200	192	1	9	2	100	111
uc002huk.1_intron_4_0_chr17_38508323_f	5p tailed mirtron candidate	202.643	178.5	21	6	0	12	18
uc002dpf.3_intron_10_0_chr16_28402303_r.3p	5p tailed mirtron candidate	203.476	197.64	5	1	2	1.5	4.5
uc010byi.2_intron_9_0_chr16_28734873_f.3p	5p tailed mirtron	203.476	197.64	5	1	2	1.5	4.5
uc010vpb.1_intron_44_0_chr16_88804849_r	5p tailed mirtron candidate	205	169	5	1	2	0	3
uc001obg.2_intron_5_0_chr11_64559559_r	5p tailed mirtron candidate	206	0	205	6	0	0	6
uc011dmt.1_intron_3_0_chr6_30857208_f.3p	5p tailed mirtron	210.433	152.43	56	4	1.5	12	17.5
uc002egp.1_intron_17_0_chr16_50828340_f.3p	5p tailed mirtron candidate	214	213	1	3	0	0	3
uc003nyk.2_intron_7_0_chr6_31924616_r	mirtron	216.333	156	36	28.5	16	3	47.5
uc003odf.2_intron_1_0_chr6_33169434_f	shrna candidate	284.2	217.2	57	12	63	3	78
uc003crt.2_intron_16_0_chr3_47890041_f	5p tailed mirtron candidate	220.05	18.86	197	0	0	0	0
uc001nzq.1_intron_4_0_chr11_64082384_f	5p tailed mirtron candidate	221	221	0	6	15	11	32
uc001eoc.1_intron_10_0_chr1_145584298_f	5p tailed mirtron	222.5	203	16	2	0	3	5
uc002lvg.2_intron_5_0_chr19_2246802_f	5p tailed mirtron candidate	224	169	17	8	7	8	23
uc003oqx.1_intron_2_0_chr6_41700478_r.5p	shrna candidate	224	22	202	2	0	0	2
uc003nvx.1_intron_16_0_chr6_31668806_r	5p tailed mirtron	225	174	37	18	2	2	22
uc003nbq.2_intron_1_0_chr6_16130979_f.3p	5p tailed mirtron	226	178	46	0	2	0	2
uc002zrk.1_intron_5_0_chr22_20102209_r	5p tailed mirtron	227	16	211	6	0	2	8
uc003oaj.3_intron_2_0_chr6_32147541_f	5p tailed mirtron	229.7	136.5	87.2	1	2	2	5
uc002qjv.2_intron_19_0_chr19_55756554_r	5p tailed mirtron	231	3	227	2	2	5	9
uc002mfn.2_intron_13_0_chr19_6735716_r	5p tailed mirtron candidate	232.292	210	1	14	40	1	55
uc001bfj.2_intron_61_0_chr1_22191567_r	5p tailed mirtron candidate	235	233	1	86	43	0	129
uc011dnk.1_intron_1_0_chr6_31323001_r	3p tailed mirtron	238	229.5	3	8	0	10	18
uc001hps.1_intron_0_0_chr1_226109780_r	5p tailed mirtron	240.2	148.2	91	21	5	0	26
uc002hra.2_intron_4_0_chr17_37070729_f.3p	5p tailed mirtron	245.667	233.67	9	18	6	1	25
uc003uuk.2_intron_12_0_chr7_99952864_f.3p	shrna candidate	361	214	135	7	1	1	9
uc003uzn.2_intron_0_0_chr7_102105608_f.3p	shrna candidate	818	810	7	1	1	17	19
uc004fll.3_intron_11_0_chrX_153678668_f	3p tailed mirtron	246	198.5	39	4	0	1.33333	5.33333
uc002kos.1_intron_9_0_chr18_10759582_r	5p tailed mirtron	252.867	196.87	55	5	14	0	19
uc001sof.1_intron_14_0_chr12_57906137_f	5p tailed mirtron	253.583	102.33	122	11	7	2	20
uc004dyy.2_intron_42_0_chrX_70361221_f.3p	5p tailed mirtron candidate	253.63	181	6	4	5	3	12
uc003ykr.1_intron_57_0_chr8_103373855_r.5p	shrna candidate	93.5	70	12	1	0	1	2
uc002fwx.1_intron_16_0_chr17_3853891_r	5p tailed mirtron candidate	254.5	252.5	2	0	0	4.5	4.5
uc001aub.2_intron_2_0_chr1_12638985_r	5p tailed mirtron	255	229	16	13	10	1	24
uc009xwb.2_intron_8_0_chr10_100191049_r.3p	5p tailed mirtron	265.658	22	239.66	3	0	2	5
uc001gxd.2_intron_7_0_chr1_201970896_f.3p	5p tailed mirtron	271.5	212.5	57	2	2	2	6
uc010xlk.1_intron_8_0_chr19_11224126_f	5p tailed mirtron	273.25	258	14.25	5	0	52.5	57.5
uc002jnz.3_intron_28_0_chr17_73494620_f	5p tailed mirtron	274	262	11	3	1	10	14
uc003okp.1_intron_4_0_chr6_35438129_f	5p tailed mirtron	274.667	102.67	140	3	0	7	10
uc002fsg.2_intron_0_0_chr17_909410_r.3p	5p tailed mirtron candidate	275	270.5	1	17	0	1	18
uc011ktd.1_intron_1_0_chr7_143079541_f	5p tailed mirtron candidate	276.5	6	264.5	4	4	0	8
uc003zsz.2_intron_14_0_chr9_33467867_r	5p tailed mirtron	281.5	235.5	44	0	0	11	11
uc010ryj.1_intron_1_0_chr11_118514659_f	5p tailed mirtron	284.5	4.5	276	5	9	0	14
uc002zhg.2_intron_7_0_chr21_46897880_f	5p tailed mirtron	296	278	17	0	0	0	0
uc002lvf.1_intron_1_0_chr19_2234061_r	mirtron	301	4	296	7	0	2	9
uc003zwe.2_intron_11_0_chr9_35095974_r	shrna candidate	107.571	2	77	0	7	2	9
uc003yre.2_intron_5_0_chr8_125520756_r	mirtron	301.567	12	255.73	5	0	1	6
uc001cim.2_intron_6_0_chr1_43637323_r	5p tailed mirtron	302	220	81	1	10	0	11
uc003zau.2_intron_0_0_chr8_145133803_f.3p	5p tailed mirtron	302	290	10	17	2	10	29
uc003agu.3_intron_8_0_chr22_30398983_f.3p	5p tailed mirtron	303	222	80	3	0	0	3
uc002mvw.1_intron_6_0_chr19_13060223_f.3p	5p tailed mirtron candidate	305.333	6	287.83	1	1	4	6
uc002yia.2_intron_4_0_chr20_62708308_r.3p	5p tailed mirtron	311.5	256	48	0	0	2	2
uc002hqi.3_intron_12_0_chr17_36875837_f	5p tailed mirtron	316.6	278	33	0	9.5	1	10.5
uc011mzn.1_intron_13_0_chrX_153582660_r	mirtron candidate	326	318	1	27	0	11	38
uc001rra.1_intron_7_0_chr12_48525177_f.3p	5p tailed mirtron	330.5	279	49.5	2	30	5	37
uc003nvb.3_intron_16_0_chr6_31601425_f	5p tailed mirtron	334.833	279.83	38	2	7	0	9
uc002mbo.2_intron_3_0_chr19_4930889_f.3p	5p tailed mirtron	336	287	47	0	0	6	6
uc001gyx.1_intron_5_0_chr1_202987690_f.3p	5p tailed mirtron candidate	339	0	334	0	0	0	0
uc002ppn.2_intron_3_0_chr19_50285982_f.3p	5p tailed mirtron	340.333	262.33	71	66	27	4	97
uc001ltb.2_intron_37_0_chr11_1277456_f	5p tailed mirtron	345	335	9	2	0	11	13
uc004bys.2_intron_12_0_chr9_132631705_f	5p tailed mirtron	345	44	299	0	0	0	0
uc002dww.2_intron_3_0_chr16_30198267_f	5p tailed mirtron candidate	355	45	307	0	0	1	1
uc002ppc.1_intron_3_0_chr19_50185323_f	5p tailed mirtron	355.5	334.5	20	20	33	4	57
uc002gct.1_intron_0_0_chr17_6347809_f.5p	3p tailed mirtron candidate	357.42	330	16.51	0.04	0	1.04	1.08
uc010fya.1_intron_5_0_chr2_233346560_r.3p	5p tailed mirtron candidate	359.833	26	321.33	155	61	0	216
uc010ybf.1_intron_1_0_chr19_50357801_f	5p tailed mirtron	361.667	298.67	60	1	0	3	4
uc011ktd.1_intron_2_0_chr7_143079779_f	mirtron	363	331	10	33	57	14	104
uc001bjq.2_intron_2_0_chr1_25245836_r.3p	5p tailed mirtron	366	328	36	6	8	0	14
uc002qjv.2_intron_11_0_chr19_55751280_r	5p tailed mirtron	366.5	88.5	277	10	8	3	21
uc003tjo.3_intron_1_0_chr7_44089880_f.3p	5p tailed mirtron	367.167	294.17	68	1	8	1	10
uc010bts.2_intron_1_0_chr16_4555612_f.3p	5p tailed mirtron candidate	373.867	1	372.87	34	17.2	2	53.2
uc002fkm.2_intron_1_0_chr16_87868198_r.3p	5p tailed mirtron	373.917	27.17	315.5	7	14	0	21
uc002ldd.2_intron_5_0_chr18_46190923_f.3p	5p tailed mirtron	385	377	7	15	35	1	51
uc010ceu.2_intron_19_0_chr16_67991700_r	shrna candidate	71.5833	5	55	1	0	0	1
uc001eto.2_intron_1_0_chr1_149937804_r.3p	5p tailed mirtron candidate	394.5	388.5	1	86	62	13	161
uc001tsa.1_intron_19_0_chr12_111776279_f.3p	5p tailed mirtron candidate	396.333	394	2.33	0	0	0	0
uc002qsc.2_intron_0_0_chr19_58838481_f.3p	5p tailed mirtron	416	3	412	11	10	5	26
uc001api.1_intron_5_0_chr1_8926561_r.3p	5p tailed mirtron	417	392	12	63	43	1	107
uc010vab.1_intron_10_0_chr16_16418385_f	5p tailed mirtron	418.379	184.35	226.69	4.4	1.4	23.0536	28.8536
uc002vho.1_intron_9_0_chr2_219144850_r.3p	5p tailed mirtron	424.5	356	67.5	1	4	0	5
uc011moc.1_intron_11_0_chrX_53228071_r	5p tailed mirtron	424.833	186	100	16	7.5	7	30.5
uc010ccm.2_intron_23_0_chr16_56936421_f.3p	5p tailed mirtron	426	420	1	103	55	0	158
uc003zcj.2_intron_4_0_chr8_145619376_r	5p tailed mirtron	431.117	286.7	143.42	6	4	0.5	10.5
uc001ubj.2_intron_5_0_chr12_122286983_r.3p	5p tailed mirtron candidate	439.843	1	436.83	15	24	0	39
uc001oey.2_intron_32_0_chr11_65403779_f	3p tailed mirtron	443.833	47.5	373.33	0	0	9	9
uc002ola.2_intron_6_0_chr19_39868465_f.3p	5p tailed mirtron candidate	450.75	387.75	1	7	10	12	29
uc002crm.2_intron_3_0_chr16_2827129_r	5p tailed mirtron candidate	462.231	446.2	6	0	0	0.5	0.5
uc002mps.1_intron_17_0_chr19_10935898_f.3p	5p tailed mirtron	472.323	313	144.83	30.5	26	2	58.5
uc010xjc.1_intron_8_0_chr19_6389649_r.3p	5p tailed mirtron	495	442	53	141	102	5	248
uc010rgq.1_intron_21_0_chr11_46397948_f	3p tailed mirtron	498.833	485.83	9	1	0	1	2
uc003aul.2_intron_3_0_chr22_38363178_f	5p tailed mirtron	519.333	337.33	175	9	5	2	16
uc001xed.2_intron_3_0_chr14_59925723_r.3p	5p tailed mirtron candidate	530.583	529.58	1	32.3333	12.6667	3	48
uc003zwz.1_intron_5_0_chr9_35608009_f	5p tailed mirtron	538	513	25	2	6	3	11
uc002cqd.1_intron_8_0_chr16_2493802_f.3p	5p tailed mirtron	542.333	531.33	9	1	0	0	1
uc009yrl.2_intron_5_0_chr11_66812185_f.3p	5p tailed mirtron	543	541	1	107	114	29	250
uc010szo.1_intron_0_0_chr12_121442296_r.3p	5p tailed mirtron candidate	547.333	529.67	17	35	18	7	60
uc002qtg.1_intron_15_0_chr19_59061652_f	mirtron	553.95	473.95	62	94	4	7	105
uc002uqj.1_intron_20_0_chr2_189859826_f.3p	5p tailed mirtron	558.333	530	4	0	0	0	0
uc010wes.1_intron_7_0_chr17_38182585_r	5p tailed mirtron	561.45	554.7	5	0	2	1	3
uc003mkp.2_intron_1_0_chr5_179225278_r	mirtron	600.5	213	373	153	34	72.5	259.5
uc001ciz.2_intron_2_0_chr1_43830319_r	5p tailed mirtron	618.983	576.98	41	10.3333	23.4	3	36.7333
uc010cws.1_intron_3_0_chr17_38318165_f	5p tailed mirtron	622.5	577.5	44	0	1	0	1
uc010off.1_intron_6_0_chr1_26880743_f	5p tailed mirtron	627.867	87.5	538.53	53	9	11	73
uc001hrr.2_intron_1_0_chr1_228284964_f	5p tailed mirtron	628.737	111.62	443	8	0	3	11
uc001zbj.2_intron_85_0_chr15_28518151_r.3p	5p tailed mirtron candidate	629	624	3	0	0	2	2
uc002pqo.2_intron_14_0_chr19_50391092_f	5p tailed mirtron	636	626	9	1	1	2	4
uc003ejl.2_intron_1_0_chr3_127294109_r	5p tailed mirtron	638	629	6	6	8	3	17
uc002vhn.2_intron_5_0_chr2_219206350_f	5p tailed mirtron	642.5	580.5	60	37	34	8	79
uc002cos.1_intron_28_0_chr16_2156679_r	5p tailed mirtron	681.967	184.35	494.62	2.5	3.5	28.5202	34.5202
uc002ddj.1_intron_3_0_chr16_15227932_r	5p tailed mirtron	681.967	184.35	494.62	2.5	3.5	28.5202	34.5202
uc002lwi.1_intron_5_0_chr19_2762643_r.3p	5p tailed mirtron candidate	689.7	684.7	5	3	10	2	15
uc002grp.1_intron_1_0_chr17_17716794_r	5p tailed mirtron	700.5	606	92	69	5	12	86
uc010lhk.1_intron_1_0_chr7_100465611_f	5p tailed mirtron	723.167	694.33	13.5	81	37	15	133
uc001ntn.1_intron_2_0_chr11_62334483_r	5p tailed mirtron	753.417	250.25	490.17	81	48	14.1667	143.167
uc001cjk.1_intron_53_0_chr1_43914156_f	5p tailed mirtron	772.975	703.97	48.5	6	0	6	12
uc002hsm.2_intron_25_0_chr17_37882107_f.3p	5p tailed mirtron	783.533	140.2	642.33	51	1	10	62
uc002iaz.2_intron_6_0_chr17_40860102_r.3p	5p tailed mirtron	791.367	772.83	17.33	1	2	0	3
uc001pyp.2_intron_0_0_chr11_122928537_r.3p	5p tailed mirtron candidate	817.572	0	221.31	0	4	3	7
uc002cqk.2_intron_5_0_chr16_2550492_f	5p tailed mirtron candidate	830	11	814	27	15	2	44
uc010mzz.2_intron_2_0_chr9_135926366_f.3p	5p tailed mirtron	846	840	4	8	3	2	13
uc003yzo.1_intron_29_0_chr8_144895132_r	3p tailed mirtron	875.833	75.33	798	252	104	76.3333	432.333
uc002qkv.2_intron_3_0_chr19_55899417_f	5p tailed mirtron	939	921	7	3	4	1	8
uc003zxt.2_intron_24_0_chr9_35710681_r	5p tailed mirtron	972.583	937.08	27	6	17	0	23
uc003ttd.2_intron_1_0_chr7_64129557_f.3p	5p tailed mirtron	1002	966	14	11	14	16	41
uc003tte.2_intron_0_0_chr7_64126664_f.3p	5p tailed mirtron candidate	1002	966	14	11	14	16	41
uc002mvu.2_intron_4_0_chr19_13051267_f	5p tailed mirtron	1072.5	902	165	50	33	9	92
uc001snd.2_intron_48_0_chr12_57588287_f	mirtron	1119	853	263.5	358	27	0	385
uc002mer.3_intron_5_0_chr19_6416419_r	3p tailed mirtron	1237.5	682	553.5	345.5	275	7.5	628
uc003xfn.1_intron_14_0_chr8_27289879_f.3p	5p tailed mirtron	1290	37	1253	0	0	2	2
uc002lpp.2_intron_6_0_chr19_804940_f	3p tailed mirtron	1329	1196	99	117	10	75	202
uc001nvf.1_intron_1_0_chr11_62560174_r.3p	5p tailed mirtron	1433	1360	70	89	43	35	167
uc001tst.2_intron_9_0_chr12_112236047_f.3p	5p tailed mirtron	1478	1454	22	0	2	0	2
uc010deh.2_intron_1_0_chr17_62496892_r.3p	5p tailed mirtron	1536.5	1363	144	3	1	19	23
uc010pvh.1_intron_3_0_chr1_224585929_r	5p tailed mirtron	1656.5	767.5	884	75	44	76	195
uc010ulp.1_intron_11_0_chr15_75132983_r.3p	5p tailed mirtron	1660.17	1622.67	19	5	1	12	18
uc002hwy.2_intron_6_0_chr17_39673418_r.3p	5p tailed mirtron	1871	22	1847	36	35	8	79
uc003crt.2_intron_20_0_chr3_47891045_f	mirtron	2157.33	368	1489	54	15	61	130
uc003zdz.2_intron_4_0_chr8_146017300_r	3p tailed mirtron	2606.6	2585	9	1331	866	46	2243
uc010pkk.1_intron_1_0_chr1_161196395_f.3p	5p tailed mirtron	2768	2614	154	183	77	21	281
uc002hzr.2_intron_19_0_chr17_40665997_f	5p tailed mirtron	3928	3324.5	595.5	4	0	9.83333	13.8333
uc010edt.2_intron_10_0_chr19_35836030_f	5p tailed mirtron	5229.27	53	267	5	0	0	5
uc001bxe.1_intron_4_0_chr1_33798006_r.3p	5p tailed mirtron	6061	5440	600	164	107	30	301
uc010zpy.1_intron_0_0_chr20_2633310_f	5p tailed mirtron	6679.06	6628	18	761	516	200	1477
uc011bra.1_intron_17_0_chr3_183959193_f	mirtron	7027.38	6963	64.38	574	1066	33	1673
uc003nqk.2_intron_12_0_chr6_30552109_f	mirtron	38927.6	38249.2	598.81	4739	3228	1345.92	9312.92
